# Supplementary material for: Transcriptomic Data Meta-Analysis Sheds Light on High Light Response in Arabidopsis thaliana L.
Source: MDPI journal article supplement (doi:10.3390/ijms23084455), 2022-04-18
Supplement: s1 [file s1]

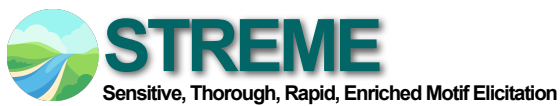

For further information on how to interpret these results please access <https://meme-suite.org/meme/doc/streme.html>.

To get a copy of the MEME software please access <https://meme-suite.org>.

If you use STREME in your research, please cite the following paper:

Timothy L. Bailey, "STREME: accurate and versatile sequence motif discovery", *Bioinformatics*, Mar. 24, 2021. [[full text](#)]

[DISCOVERED MOTIFS](#) | 
 [INPUTS & SETTINGS](#) | 
 [PROGRAM INFORMATION](#) | 
 [MOTIFS IN MEME TEXT FORMAT](#) | 
 [MATCHING SEQUENCES](#)  | 
 [RESULTS IN XML FORMAT](#)

## DISCOVERED MOTIFS

[Next Top](#)

| Motif      | Logo | RC Logo | P-value  | E-value  | Sites        | More              | Submit/Download   | Positional Distribution | Matches per Sequence |
|------------|------|---------|----------|----------|--------------|-------------------|-------------------|-------------------------|----------------------|
| 1-WATTAATW |      |         | 8.9e-023 | 2.0e-021 | 1746 (35.4%) | <a href="#">↓</a> | <a href="#">→</a> |                         |                      |
| 2-ATTTATAA |      |         | 1.0e-014 | 2.4e-013 | 1483 (30.0%) | <a href="#">↓</a> | <a href="#">→</a> |                         |                      |
| 3-TTAAATAW |      |         | 1.4e-009 | 3.1e-008 | 1387 (28.1%) | <a href="#">↓</a> | <a href="#">→</a> |                         |                      |
| 4-MTAATAT  |      |         | 2.8e-008 | 6.3e-007 | 674 (13.6%)  | <a href="#">↓</a> | <a href="#">→</a> |                         |                      |
| 5-ATTAAT   |      |         | 5.9e-008 | 1.4e-006 | 1660 (33.6%) | <a href="#">↓</a> | <a href="#">→</a> |                         |                      |
| 6-TATCCA   |      |         | 4.7e-005 | 1.1e-003 | 353 (7.1%)   | <a href="#">↓</a> | <a href="#">→</a> |                         |                      |

Stopped because 3 consecutive motifs exceeded the p-value threshold (0.05).  
 STREME ran for 1667.29 seconds.

| Motif        | Logo                                                                                | RC Logo                                                                             | P-value  | E-value  | Sites        | More              | Submit/Download   | Positional Distribution                                                               | Matches per Sequence                                                                  |
|--------------|-------------------------------------------------------------------------------------|-------------------------------------------------------------------------------------|----------|----------|--------------|-------------------|-------------------|---------------------------------------------------------------------------------------|---------------------------------------------------------------------------------------|
| 7-ATTTAA     |    |    | 9.9e-005 | 2.3e-003 | 211 (4.3%)   | <a href="#">↓</a> | <a href="#">→</a> |    |    |
| 8-AWAACGW    |    |    | 3.0e-004 | 7.0e-003 | 1021 (20.7%) | <a href="#">↓</a> | <a href="#">→</a> |    |    |
| 9-AGTCAA     |    |    | 8.7e-004 | 2.0e-002 | 466 (9.4%)   | <a href="#">↓</a> | <a href="#">→</a> |    |    |
| 10-TAACAAA   |    |    | 1.4e-003 | 3.3e-002 | 568 (11.5%)  | <a href="#">↓</a> | <a href="#">→</a> |    |    |
| 11-MCACGTDAY |    |    | 4.1e-003 | 9.5e-002 | 716 (14.5%)  | <a href="#">↓</a> | <a href="#">→</a> |    |    |
| 12-CATTTAV   |   |   | 9.7e-003 | 2.2e-001 | 406 (8.2%)   | <a href="#">↓</a> | <a href="#">→</a> |   |   |
| 13-ATTATAAT  |  |  | 1.2e-002 | 2.8e-001 | 87 (1.8%)    | <a href="#">↓</a> | <a href="#">→</a> |  |  |
| 14-TCTAGA    |  |  | 1.3e-002 | 3.1e-001 | 31 (0.6%)    | <a href="#">↓</a> | <a href="#">→</a> |  |  |

Stopped because 3 consecutive motifs exceeded the p-value threshold (0.05).  
STREME ran for 1667.29 seconds.

| Motif                    | Logo                                                                                | RC Logo                                                                             | P-value  | E-value  | Sites       | More              | Submit/Download   | Positional Distribution                                                               | Matches per Sequence                                                                  |
|--------------------------|-------------------------------------------------------------------------------------|-------------------------------------------------------------------------------------|----------|----------|-------------|-------------------|-------------------|---------------------------------------------------------------------------------------|---------------------------------------------------------------------------------------|
| 15-ATATAC                |    |    | 1.5e-002 | 3.4e-001 | 584 (11.8%) | <a href="#">↓</a> | <a href="#">→</a> |    |    |
| 16-TATTAAAA              |    |    | 2.3e-002 | 5.3e-001 | 52 (1.1%)   | <a href="#">↓</a> | <a href="#">→</a> |    |    |
| 17-NHTCTAGADN            |    |    | 2.6e-002 | 5.9e-001 | 257 (5.2%)  | <a href="#">↓</a> | <a href="#">→</a> |    |    |
| 18-YACGWAW               |    |    | 3.0e-002 | 6.9e-001 | 356 (7.2%)  | <a href="#">↓</a> | <a href="#">→</a> |    |    |
| 19-RRACCATTA             |    |    | 4.6e-002 | 1.1e+000 | 99 (2.0%)   | <a href="#">↓</a> | <a href="#">→</a> |    |    |
| 20-AGTCCTHW              |   |   | 4.9e-002 | 1.1e+000 | 275 (5.6%)  | <a href="#">↓</a> | <a href="#">→</a> |   |   |
| 21-<br>AAARACTTTRTTKTAAA |  |  | 1.3e-001 | 3.0e+000 | 9 (0.2%)    | <a href="#">↓</a> | <a href="#">→</a> |  |  |
| 22-GTGACRWA              |  |  | 2.4e-001 | 5.4e+000 | 253 (5.1%)  | <a href="#">↓</a> | <a href="#">→</a> |  |  |

Stopped because 3 consecutive motifs exceeded the p-value threshold (0.05).  
STREME ran for 1667.29 seconds.

Motif

Logo

RC Logo

P-value

E-value

Sites

More

Submit/Download

Positional Distribution

Matches per Sequence

23-ACAAGT

2.8e-001

6.5e+000

422 (8.5%)

↓

→

Stopped because 3 consecutive motifs exceeded the p-value threshold (0.05).  
STREME ran for 1667.29 seconds.

INPUTS & SETTINGS

[Previous](#) [Next](#) [Top](#)

Sequences

| Role                         | Source          | Alphabet | Sequence Count | Total Size |
|------------------------------|-----------------|----------|----------------|------------|
| Positive (primary) Sequences | regions-7.fasta | DNA      | 4939           | 480645     |
| Negative (control) Sequences | prom-1500.fasta | DNA      | 32805          | 3198248    |

Background Model

Source: built from the negative (control) sequences

Order: 2 (only order-0 shown)

| Name     | Freq. | Bg.  |       | Bg.  | Freq. | Name    |
|----------|-------|------|-------|------|-------|---------|
| Adenine  | 0.351 | 0.33 | A ~ T | 0.33 | 0.351 | Thymine |
| Cytosine | 0.149 | 0.17 | C ~ G | 0.17 | 0.149 | Guanine |

Other Settings

|                        |                                                                         |
|------------------------|-------------------------------------------------------------------------|
| Strand Handling        | Both the given and reverse complement strands are processed.            |
| Objective Function     | Differential Enrichment                                                 |
| Statistical Test       | Binomial Test                                                           |
| Minimum Motif Width    | 6                                                                       |
| Maximum Motif Width    | 20                                                                      |
| Test Set               | 10% of the input sequences were randomly assigned to the test set.      |
| Word Evaluation        | Up to 25 words of each width from 6 to 20 were evaluated to find seeds. |
| Seed Refinement        | Up to 4 seeds of each width from 6 to 20 were further refined.          |
| Refinement Iterations  | Up to 20 iterations were allowed when refining a seed.                  |
| Random Number Seed     | 1                                                                       |
| Total Length           | The total length of the sequence set(s) was not limited.                |
| Maximum Motif p-value  | Stop when the p-value is greater than 0.05 for 3 consecutive motifs.    |
| Maximum Motifs to Find | No maximum number of motifs.                                            |
| Maximum Run Time       | No maximum running time.                                                |

[Previous](#) [Top](#)

STREME version

5.4.1 (Release date: Sat Aug 21 19:23:23 2021 -0700)

Reference

Timothy L. Bailey, "STREME: accurate and versatile sequence motif discovery", *Bioinformatics*, Mar. 24, 2021. [\[full text\]](#)

Command line

streme --p regions-7.fasta --n prom-1500.fasta --o ./streme\_out-7\_005-1148 --dna --minw 6 --maxw 20 --seed 1
