# Supplementary material for: Transcriptomic Data Meta-Analysis Sheds Light on High Light Response in Arabidopsis thaliana L
Source: Int J Mol Sci. 2022 Apr 18;23(8):4455. doi: 10.3390/ijms23084455 (PMC9026532; doi:10.3390/ijms23084455)
Supplement: Supplementary file 1 [file ijms-23-04455-s001.zip]

Archive with 10 entries (10 files):
- S1.pdf
- S10.pdf
- S2.xlsx
- S3.xlsx
- S4.xlsx
- S5.xlsx
- S6.xlsx
- S7.xlsx
- S8.xlsx
- S9.xlsx
