# Supplementary material for: Transcriptomic Data Meta-Analysis Sheds Light on High Light Response in Arabidopsis thaliana L
Source: Int J Mol Sci. 2022 Apr 18;23(8):4455. doi: 10.3390/ijms23084455 (PMC9026532; doi:10.3390/ijms23084455)
Supplement: Supplementary file 1 [file ijms-23-04455-s001.zip › S2.xlsx]

## Sheet: Лист1
Table S2	Differentially expressed genes in response to high light
experiment	id	log2fold	FDR	genotype/treatment
GSE111062	AT2G34430	9.41109	0.000173045	24hr
GSE111062	AT5G46900	6.50349	0.00406687	72hr
GSE111062	AT2G21650	6.01826	0.00217514	72hr
GSE111062	AT5G10250	5.71577	0.000220734	48hr
GSE111062	AT5G46890	4.88065	0.0463522	72hr
GSE111062	AT1G02380	4.70758	0.0118434	72hr
GSE111062	AT2G45180	4.70534	0.000182255	72hr
GSE111062	AT1G49130	4.66486	0.000409426	24hr
GSE111062	AT3G55240	4.63556	1.93777e-05	24hr
GSE111062	AT2G22810	4.61	0.0276343	12hr
GSE111062	AT3G05730	4.53938	0.0352089	72hr
GSE111062	AT2G21650	4.37635	0.0109137	24hr
GSE111062	AT3G23550	4.31898	0.0020069	72hr
GSE111062	AT5G53250	4.21886	0.0296813	72hr
GSE111062	AT5G48490	4.05826	0.0156184	72hr
GSE111062	AT5G36270	4.05195	0.0106967	24hr
GSE111062	AT4G36850	3.96829	0.000587463	72hr
GSE111062	AT3G46490	3.96699	0.0153332	72hr
GSE111062	AT2G46860	3.91183	0.0217209	48hr
GSE111062	AT1G29450	3.80628	0.0102414	72hr
GSE111062	AT2G18300	3.70994	0.0019457	72hr
GSE111062	AT3G06070	3.67262	0.00815641	72hr
GSE111062	AT1G68520	3.63	0.000903707	12hr
GSE111062	AT1G29460	3.6187	0.000137139	48hr
GSE111062	AT1G66100	3.61125	8.093e-06	72hr
GSE111062	AT1G29910	3.56849	0.00201838	24hr
GSE111062	AT3G27690	3.48413	0.00847083	6hr
GSE111062	AT5G02760	3.4437	1.11624e-07	48hr
GSE111062	AT1G05135	3.35808	0.0292228	24hr
GSE111062	AT2G25900	3.20368	0.0134564	6hr
GSE111062	AT4G19170	3.18	0.00369141	12hr
GSE111062	AT4G11460	3.17	0.00967814	12hr
GSE111062	AT1G29450	3.15895	0.0157823	6hr
GSE111062	AT2G16980	3.12182	0.00153258	72hr
GSE111062	AT3G16240	3.118	0.00103093	72hr
GSE111062	AT5G22920	3.10293	0.020122	72hr
GSE111062	AT4G04840	3.07301	0.00183419	72hr
GSE111062	AT5G47990	3.06599	0.0296839	24hr
GSE111062	AT5G16030	3.04299	0.00218395	24hr
GSE111062	AT1G80440	3.02762	0.032315	72hr
GSE111062	AT1G29510	3.00762	0.0076256	24hr
GSE111062	AT2G34420	2.90036	0.00561929	24hr
GSE111062	AT3G16240	2.89	0.00478256	12hr
GSE111062	AT1G68520	2.87617	0.0134534	48hr
GSE111062	AT5G54585	2.85	0.00664118	12hr
GSE111062	AT3G08940	2.73	0.00816051	12hr
GSE111062	AT5G02160	2.72438	0.0211097	72hr
GSE111062	AT2G25735	2.72	0.000351471	12hr
GSE111062	AT3G46490	2.71418	0.026298	24hr
GSE111062	AT3G54890	2.64583	0.0217307	24hr
GSE111062	AT2G17880	2.57955	0.00231915	6hr
GSE111062	AT5G47455	2.567	0.0342926	0.5hr
GSE111062	AT3G23480	2.53403	0.00111419	48hr
GSE111062	AT1G23390	2.5	0.0022946	12hr
GSE111062	AT4G38690	2.48	0.00392234	12hr
GSE111062	AT1G21500	2.47921	8.48125e-05	24hr
GSE111062	AT2G44740	2.46773	0.00436421	6hr
GSE111062	AT3G56060	2.45	0.000311611	12hr
GSE111062	AT2G16980	2.39348	0.0409139	24hr
GSE111062	AT1G13420	2.37982	0.00798382	48hr
GSE111062	AT1G03130	2.35141	0.0060698	72hr
GSE111062	AT5G64040	2.34007	3.39415e-06	72hr
GSE111062	AT5G65730	2.33414	0.0294562	72hr
GSE111062	AT3G62040	2.32264	0.0256523	72hr
GSE111062	AT1G31330	2.31714	0.000629082	72hr
GSE111062	AT3G45070	2.30652	0.00331535	24hr
GSE111062	AT1G70290	2.30589	0.0370575	72hr
GSE111062	AT1G07050	2.28753	2.98072e-05	24hr
GSE111062	AT1G22330	2.27	0.0155628	12hr
GSE111062	AT2G34620	2.2	0.00547826	12hr
GSE111062	AT1G21270	2.18264	0.00938984	24hr
GSE111062	AT2G25200	2.1779	0.00546946	6hr
GSE111062	AT5G04390	2.16837	0.0201814	24hr
GSE111062	AT1G01580	2.16321	0.0259544	72hr
GSE111062	AT1G25440	2.16	0.0244431	12hr
GSE111062	AT1G64720	2.10604	0.012686	6hr
GSE111062	AT1G69160	2.10269	0.000175411	6hr
GSE111062	AT1G64720	2.01	0.0207891	12hr
GSE111062	AT4G00950	2	0.0430522	12hr
GSE111062	AT2G42750	1.98124	0.00401541	6hr
GSE111062	AT1G72150	1.97638	0.0106663	72hr
GSE111062	AT2G39310	1.97372	0.00978776	24hr
GSE111062	AT1G77210	1.97118	0.00379298	72hr
GSE111062	AT2G01420	1.93837	0.0128415	48hr
GSE111062	AT2G18800	1.93532	0.0131586	48hr
GSE111062	AT1G56220	1.92	0.0410645	12hr
GSE111062	AT1G03870	1.91379	0.0151132	48hr
GSE111062	AT2G05100	1.90315	0.00128192	6hr
GSE111062	AT4G22212	1.85999	0.040983	72hr
GSE111062	AT1G34760	1.85668	0.0315577	6hr
GSE111062	AT5G42250	1.839	0.0373698	24hr
GSE111062	AT1G21130	1.80903	0.0112869	72hr
GSE111062	AT4G30610	1.80734	0.0139054	48hr
GSE111062	AT2G01420	1.79364	0.00159291	24hr
GSE111062	AT1G29930	1.79	0.00741609	12hr
GSE111062	AT1G73280	1.7756	0.0181618	24hr
GSE111062	AT4G37800	1.76664	0.00920615	72hr
GSE111062	AT3G45710	1.75022	0.000661318	72hr
GSE111062	AT1G21500	1.7455	0.0028869	6hr
GSE111062	AT1G29660	1.73092	0.00327934	72hr
GSE111062	AT5G19140	1.72989	0.0464472	6hr
GSE111062	AT2G43010	1.7289	0.0183943	72hr
GSE111062	AT1G14430	1.67757	0.0213358	48hr
GSE111062	AT2G41560	1.67734	0.0161801	24hr
GSE111062	AT1G22530	1.67402	0.00572124	72hr
GSE111062	AT1G78260	1.66879	0.0387273	72hr
GSE111062	AT1G70820	1.66394	0.0428777	24hr
GSE111062	AT5G18060	1.65181	0.00217995	6hr
GSE111062	AT5G54630	1.64	0.0467203	12hr
GSE111062	AT4G11190	1.62379	0.0110942	72hr
GSE111062	AT3G62550	1.6	0.00851805	12hr
GSE111062	AT5G45650	1.58	0.000820811	12hr
GSE111062	AT1G65590	1.57574	0.0309893	24hr
GSE111062	AT2G44380	1.5564	0.000387798	48hr
GSE111062	AT5G45830	1.55	0.00181659	12hr
GSE111062	AT5G44190	1.54	0.00993287	12hr
GSE111062	AT2G30930	1.53	0.00124105	12hr
GSE111062	AT2G20570	1.53	0.00622962	12hr
GSE111062	AT3G54500	1.52476	0.0249779	6hr
GSE111062	AT2G40610	1.51437	0.0051444	0.5hr
GSE111062	AT4G04570	1.51	3.66581e-05	12hr
GSE111062	AT2G30010	1.49924	0.000856367	6hr
GSE111062	AT1G61840	1.47833	0.0063707	24hr
GSE111062	AT3G48590	1.47116	0.00474012	6hr
GSE111062	AT4G31820	1.47	0.0498681	12hr
GSE111062	AT3G58990	1.45427	0.0413307	72hr
GSE111062	AT3G16850	1.44217	0.0477917	24hr
GSE111062	AT3G25717	1.44	0.0183222	12hr
GSE111062	AT5G16400	1.43045	0.0436901	24hr
GSE111062	AT1G10400	1.42187	0.00032431	72hr
GSE111062	AT5G54630	1.41343	0.0129316	48hr
GSE111062	AT2G34510	1.40087	0.0286642	72hr
GSE111062	AT2G23600	1.38	0.00506673	12hr
GSE111062	AT1G55450	1.37311	5.58099e-07	72hr
GSE111062	AT3G05160	1.37	0.0452055	12hr
GSE111062	AT3G60130	1.36	0.00347879	12hr
GSE111062	AT3G50740	1.34931	0.0097656	72hr
GSE111062	AT5G08330	1.34011	3.09601e-05	6hr
GSE111062	AT2G46710	1.33553	0.00124004	24hr
GSE111062	AT1G31330	1.33	0.0316787	12hr
GSE111062	AT1G13300	1.32139	0.039802	72hr
GSE111062	AT2G26440	1.31162	0.0153512	24hr
GSE111062	AT1G12010	1.30591	0.0360778	6hr
GSE111062	AT5G04530	1.30364	0.0305146	72hr
GSE111062	AT3G14370	1.29174	0.00499954	24hr
GSE111062	AT1G48480	1.28976	0.0432176	24hr
GSE111062	AT4G16980	1.28	0.00049719	12hr
GSE111062	AT5G19940	1.27785	0.00113418	24hr
GSE111062	AT3G16420	1.27354	0.00892152	24hr
GSE111062	AT1G62500	1.26783	0.0478307	72hr
GSE111062	AT5G10100	1.25555	0.0165884	72hr
GSE111062	AT5G51790	1.25301	0.0223313	48hr
GSE111062	AT1G17710	1.25	0.0282308	12hr
GSE111062	AT5G51970	1.24	0.0338675	12hr
GSE111062	AT3G26510	1.22963	0.0186712	72hr
GSE111062	AT5G66985	1.22913	0.0357905	72hr
GSE111062	AT1G74710	1.22652	0.0306803	6hr
GSE111062	AT1G01120	1.22	0.0102626	12hr
GSE111062	AT1G48260	1.21772	0.00357758	6hr
GSE111062	AT4G20260	1.21	0.0464186	12hr
GSE111062	AT5G25460	1.20891	0.00668761	72hr
GSE111062	AT1G48480	1.20075	0.0105466	72hr
GSE111062	AT1G77210	1.19099	0.0411507	6hr
GSE111062	AT4G34220	1.1886	0.0362879	72hr
GSE111062	AT2G42220	1.18593	0.0287094	6hr
GSE111062	AT1G18810	1.18	0.0095054	12hr
GSE111062	AT1G51805	1.175	0.00776319	24hr
GSE111062	AT2G18280	1.17	0.00154649	12hr
GSE111062	AT2G42870	1.1636	0.0007436	0.5hr
GSE111062	AT5G57630	1.1625	0.00657641	24hr
GSE111062	AT3G25670	1.16	0.0303488	12hr
GSE111062	AT4G12980	1.15905	0.0436199	72hr
GSE111062	AT2G34170	1.14115	0.0171514	6hr
GSE111062	AT4G33000	1.13594	0.00495777	6hr
GSE111062	AT1G28670	1.13459	0.00245635	6hr
GSE111062	AT1G27290	1.13	0.00163608	12hr
GSE111062	AT5G40380	1.12	0.041956	12hr
GSE111062	AT1G03400	1.12	0.0435275	12hr
GSE111062	AT5G54130	1.11	0.00264321	12hr
GSE111062	AT3G19680	1.09	0.0341749	12hr
GSE111062	AT5G14060	1.08	0.000141715	12hr
GSE111062	AT1G61840	1.07	0.00639947	12hr
GSE111062	AT5G07080	1.06707	0.0209017	72hr
GSE111062	AT2G30770	1.05512	0.0114371	6hr
GSE111062	AT5G49760	1.04658	0.00147861	24hr
GSE111062	AT4G30690	1.04635	0.00955852	24hr
GSE111062	AT4G18430	1.03216	0.0188653	72hr
GSE111062	AT3G63210	1.02672	0.0388466	24hr
GSE111062	AT2G31800	1.01	0.0291634	12hr
GSE111062	AT5G14060	0.99931	0.0491368	6hr
GSE111062	AT5G25140	0.991317	0.000128953	6hr
GSE111062	AT3G46590	0.983979	0.021063	6hr
GSE111062	AT3G01690	0.980357	0.000532707	6hr
GSE111062	AT5G26230	0.98	0.0233787	12hr
GSE111062	AT5G49440	0.972588	0.0498112	72hr
GSE111062	AT1G20190	0.97	0.0032872	12hr
GSE111062	AT5G42750	0.950716	0.00382575	6hr
GSE111062	AT3G14310	0.95	0.00173372	12hr
GSE111062	AT1G55960	0.95	0.0256213	12hr
GSE111062	AT2G38120	0.95	0.0444924	12hr
GSE111062	AT1G72820	0.944605	0.00409524	0.5hr
GSE111062	AT5G01530	0.94	0.00866033	12hr
GSE111062	AT2G45470	0.92	0.011526	12hr
GSE111062	AT2G32150	0.917482	0.0445749	6hr
GSE111062	AT1G66150	0.914155	0.0380087	72hr
GSE111062	AT1G26920	0.900429	0.00298699	0.5hr
GSE111062	AT5G64330	0.894002	0.0492333	24hr
GSE111062	AT5G08520	0.88955	0.00108081	72hr
GSE111062	AT3G22120	0.889144	0.00234297	72hr
GSE111062	AT2G22830	0.88	0.00799752	12hr
GSE111062	AT3G60180	0.878798	0.0279276	6hr
GSE111062	AT5G45490	0.865708	0.0015156	48hr
GSE111062	AT1G14430	0.863443	0.0217693	0.5hr
GSE111062	AT3G07195	0.862083	0.00474841	72hr
GSE111062	AT4G35100	0.86	0.00040149	12hr
GSE111062	AT1G11700	0.85636	0.0106457	6hr
GSE111062	AT1G70460	0.856099	0.00139192	0.5hr
GSE111062	AT3G05320	0.849259	0.00599848	24hr
GSE111062	AT2G21850	0.836815	0.0384323	72hr
GSE111062	AT1G07650	0.834098	0.0120415	24hr
GSE111062	AT2G24580	0.823323	0.0224928	72hr
GSE111062	AT4G37540	0.822836	0.033229	24hr
GSE111062	AT3G53720	0.81	0.00209585	12hr
GSE111062	AT3G10760	0.8	0.0278765	12hr
GSE111062	AT4G01430	0.797568	0.0301601	6hr
GSE111062	AT4G15140	0.796246	0.00480202	24hr
GSE111062	AT2G02080	0.791626	0.00868097	24hr
GSE111062	AT5G57700	0.79	0.0325583	12hr
GSE111062	AT5G48790	0.782786	0.0159645	24hr
GSE111062	AT1G14920	0.775401	0.0153881	48hr
GSE111062	AT4G11360	0.77	0.0415076	12hr
GSE111062	AT1G31770	0.765891	0.0118111	0.5hr
GSE111062	AT1G19350	0.765096	0.000740944	72hr
GSE111062	AT3G07310	0.761269	0.0263709	0.5hr
GSE111062	AT3G26890	0.755234	0.045125	6hr
GSE111062	AT5G01810	0.754692	0.0159085	0.5hr
GSE111062	AT1G57680	0.74	0.00562055	12hr
GSE111062	AT2G39010	0.737521	0.00169893	72hr
GSE111062	AT1G14700	0.733285	0.000115434	24hr
GSE111062	AT3G60900	0.733062	0.0245764	72hr
GSE111062	AT5G46440	0.73	0.00604267	12hr
GSE111062	AT5G23280	0.725862	0.00819993	6hr
GSE111062	AT1G65295	0.717427	6.44643e-06	48hr
GSE111062	AT5G02090	0.7	0.0210663	12hr
GSE111062	AT5G53450	0.7	0.0213375	12hr
GSE111062	AT4G03330	0.7	0.0373194	12hr
GSE111062	AT1G77490	0.698268	0.00303293	24hr
GSE111062	AT5G01620	0.693128	0.0147402	24hr
GSE111062	AT5G18210	0.67	0.029517	12hr
GSE111062	AT3G47620	0.66808	0.0142483	24hr
GSE111062	AT1G54130	0.668022	0.00418921	6hr
GSE111062	AT1G11380	0.667016	0.00916842	24hr
GSE111062	AT1G07240	0.664841	0.00527991	72hr
GSE111062	AT4G02540	0.662604	0.00126983	0.5hr
GSE111062	AT3G50890	0.655955	0.000916359	6hr
GSE111062	AT3G61430	0.653799	0.0456838	72hr
GSE111062	AT1G25450	0.65	0.0319405	12hr
GSE111062	AT2G46030	0.65	0.0455857	12hr
GSE111062	AT5G40240	0.648442	0.0302909	24hr
GSE111062	AT3G62630	0.642544	0.0293324	0.5hr
GSE111062	AT3G49070	0.64	0.01909	12hr
GSE111062	AT3G17650	0.62208	0.0248018	24hr
GSE111062	AT1G27130	0.620964	0.0122635	48hr
GSE111062	AT5G16000	0.62	0.018792	12hr
GSE111062	AT5G19220	0.612801	0.0180466	48hr
GSE111062	AT5G27550	0.612356	0.00212434	72hr
GSE111062	AT4G13860	0.610625	0.0169427	48hr
GSE111062	AT2G24530	0.605993	0.0175688	6hr
GSE111062	AT1G67840	0.6	0.0134291	12hr
GSE111062	AT1G16530	0.597957	0.0204961	0.5hr
GSE111062	AT3G59300	0.59626	0.0108484	6hr
GSE111062	AT1G66940	0.586412	0.011438	0.5hr
GSE111062	AT1G11790	-0.59	0.00195252	12hr
GSE111062	AT4G02890	-0.591099	0.0187358	24hr
GSE111062	AT2G36970	-0.596507	0.0200327	48hr
GSE111062	AT5G47870	-0.598916	0.0220814	24hr
GSE111062	AT4G32250	-0.599879	0.0338385	24hr
GSE111062	AT2G13600	-0.601395	0.000639667	6hr
GSE111062	AT1G61380	-0.605097	0.0467825	0.5hr
GSE111062	AT5G40660	-0.609808	0.0282258	72hr
GSE111062	AT5G46160	-0.61	0.0322926	12hr
GSE111062	AT5G17790	-0.61	0.0477073	12hr
GSE111062	AT4G39980	-0.61	0.0492212	12hr
GSE111062	AT1G29700	-0.618405	0.00353516	72hr
GSE111062	AT3G07090	-0.621188	0.017929	48hr
GSE111062	AT1G31800	-0.625926	0.0103144	24hr
GSE111062	AT3G04120	-0.628736	0.0299939	72hr
GSE111062	AT5G56670	-0.63	0.0262572	12hr
GSE111062	AT3G63000	-0.630818	0.0457019	24hr
GSE111062	AT2G44830	-0.634274	0.00189806	48hr
GSE111062	AT4G03540	-0.643632	0.00340813	6hr
GSE111062	AT5G56350	-0.643785	0.017054	72hr
GSE111062	AT2G01320	-0.646963	0.000142927	72hr
GSE111062	AT2G37600	-0.65	0.0125449	12hr
GSE111062	AT5G55050	-0.65	0.0131318	12hr
GSE111062	AT1G77280	-0.663724	0.00936798	72hr
GSE111062	AT5G67300	-0.671288	0.00747332	6hr
GSE111062	AT4G04850	-0.678605	0.0149816	24hr
GSE111062	AT4G17090	-0.680747	0.000344392	72hr
GSE111062	AT5G04480	-0.682114	0.0091641	0.5hr
GSE111062	AT4G37310	-0.683591	6.76438e-06	6hr
GSE111062	AT1G48850	-0.69	0.00440961	12hr
GSE111062	AT4G03820	-0.692591	0.0136973	48hr
GSE111062	AT5G49555	-0.693497	0.00129622	72hr
GSE111062	AT3G16360	-0.701034	0.0242946	6hr
GSE111062	AT4G10390	-0.706642	0.00532882	24hr
GSE111062	AT4G13750	-0.709166	0.0118237	48hr
GSE111062	AT3G23710	-0.71	0.000443749	12hr
GSE111062	AT5G54770	-0.727857	0.0400604	72hr
GSE111062	AT2G16700	-0.728622	0.00158063	48hr
GSE111062	AT2G26290	-0.733378	0.00518186	24hr
GSE111062	AT1G36380	-0.736303	0.0212965	72hr
GSE111062	AT5G24150	-0.743204	0.0427822	6hr
GSE111062	AT4G23670	-0.750089	0.000462701	72hr
GSE111062	AT4G37180	-0.755312	0.000578106	0.5hr
GSE111062	AT5G06220	-0.755609	0.0361475	24hr
GSE111062	AT1G45230	-0.756363	0.0043441	24hr
GSE111062	AT3G10410	-0.758044	0.0131565	6hr
GSE111062	AT4G25700	-0.76	0.0386965	12hr
GSE111062	AT5G41210	-0.760684	1.85302e-05	48hr
GSE111062	AT2G35940	-0.762256	0.0335098	72hr
GSE111062	AT2G38780	-0.763437	0.0116252	72hr
GSE111062	AT5G60790	-0.77	0.0106099	12hr
GSE111062	AT4G35130	-0.781085	0.00187713	6hr
GSE111062	AT4G28740	-0.784016	0.0439336	6hr
GSE111062	AT4G33950	-0.788718	0.0328543	72hr
GSE111062	AT4G10450	-0.79	0.0122771	12hr
GSE111062	AT4G26080	-0.79	0.020088	12hr
GSE111062	AT3G48000	-0.792575	0.000477432	6hr
GSE111062	AT5G45970	-0.794031	0.00346148	24hr
GSE111062	AT4G09730	-0.8	0.0222425	12hr
GSE111062	AT2G38640	-0.802857	0.0204214	6hr
GSE111062	AT1G01720	-0.811643	1.49234e-05	48hr
GSE111062	AT2G46510	-0.818513	3.91531e-05	24hr
GSE111062	AT5G39850	-0.82	0.0398606	12hr
GSE111062	AT1G30240	-0.820825	0.0403659	24hr
GSE111062	AT5G08380	-0.821288	0.0302721	72hr
GSE111062	AT3G24170	-0.834921	0.0377776	6hr
GSE111062	AT1G24600	-0.840955	0.0248923	72hr
GSE111062	AT4G05100	-0.844668	0.0221378	48hr
GSE111062	AT2G23320	-0.850339	0.0240709	0.5hr
GSE111062	AT1G35720	-0.851606	0.0491739	72hr
GSE111062	AT1G80120	-0.852209	0.0158477	48hr
GSE111062	AT1G70000	-0.862265	0.00242633	72hr
GSE111062	AT2G46800	-0.864814	0.0224944	48hr
GSE111062	AT5G02790	-0.877026	0.000488019	72hr
GSE111062	AT1G22985	-0.882791	0.0247518	48hr
GSE111062	AT1G24330	-0.889377	0.0217753	72hr
GSE111062	AT1G66160	-0.896876	0.000274968	48hr
GSE111062	AT3G03920	-0.9	0.0169204	12hr
GSE111062	AT5G11242	-0.902039	8.78e-05	0.5hr
GSE111062	AT5G02950	-0.903745	0.0430821	72hr
GSE111062	AT1G17230	-0.905969	0.0357953	0.5hr
GSE111062	AT2G39240	-0.906545	0.00877092	72hr
GSE111062	AT2G04350	-0.909429	0.0209174	48hr
GSE111062	AT3G57157	-0.91	0.0362694	12hr
GSE111062	AT1G10170	-0.914092	0.0421504	72hr
GSE111062	AT5G01850	-0.918852	0.00104604	24hr
GSE111062	AT3G26080	-0.925545	0.0174466	72hr
GSE111062	AT2G30040	-0.92642	0.0168949	24hr
GSE111062	AT1G74410	-0.927149	0.0482962	24hr
GSE111062	AT4G24340	-0.93	0.00358073	12hr
GSE111062	AT1G53670	-0.93633	0.000400004	72hr
GSE111062	AT3G14067	-0.955532	0.00305726	72hr
GSE111062	AT5G02940	-0.956245	0.0157026	24hr
GSE111062	AT3G15790	-0.962714	0.0149397	48hr
GSE111062	AT5G61930	-0.964169	0.0341251	72hr
GSE111062	AT1G15510	-0.97	0.0069686	12hr
GSE111062	AT5G58290	-0.970183	0.0198125	24hr
GSE111062	AT5G50920	-0.971636	0.0145052	48hr
GSE111062	AT5G08360	-0.975361	0.017058	48hr
GSE111062	AT5G01340	-0.981611	0.00152108	6hr
GSE111062	AT5G65870	-0.994877	0.00280861	0.5hr
GSE111062	AT4G37310	-0.998359	0.00784911	72hr
GSE111062	AT4G25700	-1.00248	0.0399837	24hr
GSE111062	AT1G27200	-1.01455	0.00486692	0.5hr
GSE111062	AT5G20380	-1.02551	0.0441155	72hr
GSE111062	AT3G03890	-1.03161	0.0117159	48hr
GSE111062	AT1G50420	-1.04283	0.00367935	24hr
GSE111062	AT3G44720	-1.05	0.00785581	12hr
GSE111062	AT1G52590	-1.05449	0.0172215	48hr
GSE111062	AT3G11270	-1.05494	0.0085046	48hr
GSE111062	AT3G03250	-1.06088	0.0173858	48hr
GSE111062	AT1G51440	-1.06109	0.00956083	72hr
GSE111062	AT1G52570	-1.06484	0.00682446	24hr
GSE111062	AT4G05050	-1.09146	0.0420092	0.5hr
GSE111062	AT3G01350	-1.09225	0.0270245	72hr
GSE111062	AT5G24380	-1.09897	0.0101584	24hr
GSE111062	AT2G43780	-1.1	0.00381079	12hr
GSE111062	AT5G49910	-1.1	0.0313753	12hr
GSE111062	AT3G15790	-1.10289	0.0144731	24hr
GSE111062	AT5G19550	-1.10859	0.00416396	24hr
GSE111062	AT5G64170	-1.10987	0.0084174	72hr
GSE111062	AT1G57770	-1.11753	0.0244565	48hr
GSE111062	AT5G12010	-1.12078	0.02675	0.5hr
GSE111062	AT3G44310	-1.13519	6.0355e-05	48hr
GSE111062	AT3G10350	-1.14712	0.027383	24hr
GSE111062	AT5G20280	-1.14716	0.00167137	48hr
GSE111062	AT5G10730	-1.15894	0.000311189	6hr
GSE111062	AT3G27900	-1.1594	0.0287661	24hr
GSE111062	AT1G76040	-1.1767	0.0369362	0.5hr
GSE111062	AT4G12460	-1.17766	0.021018	24hr
GSE111062	AT2G18950	-1.17854	0.00768628	72hr
GSE111062	AT1G07620	-1.17975	0.0100045	6hr
GSE111062	AT5G43580	-1.18131	1.41348e-05	72hr
GSE111062	AT5G09590	-1.19854	0.0280997	24hr
GSE111062	AT2G23000	-1.21074	0.038958	6hr
GSE111062	AT3G60160	-1.21859	4.3708e-05	48hr
GSE111062	AT3G51000	-1.23541	0.0482492	72hr
GSE111062	AT4G01026	-1.24643	0.0282309	0.5hr
GSE111062	AT4G39955	-1.25486	0.00485319	72hr
GSE111062	AT1G64950	-1.26014	0.00290567	72hr
GSE111062	AT1G15100	-1.27043	0.0111639	0.5hr
GSE111062	AT5G47920	-1.29327	0.000814133	0.5hr
GSE111062	AT3G08770	-1.29357	0.00747383	72hr
GSE111062	AT5G26860	-1.29719	0.00245459	24hr
GSE111062	AT5G02490	-1.31677	0.00124135	72hr
GSE111062	AT4G25850	-1.32853	0.0122747	24hr
GSE111062	AT3G09440	-1.34789	0.0129683	24hr
GSE111062	AT2G31060	-1.36	0.0104329	12hr
GSE111062	AT1G32870	-1.36309	0.0483575	0.5hr
GSE111062	AT4G37760	-1.36969	0.0424078	24hr
GSE111062	AT5G53420	-1.37866	0.0057398	24hr
GSE111062	AT5G60470	-1.38118	0.0343449	24hr
GSE111062	AT5G24120	-1.38136	0.00207663	6hr
GSE111062	AT1G72240	-1.38483	0.0169844	0.5hr
GSE111062	AT1G33560	-1.40181	0.00342108	72hr
GSE111062	AT4G17840	-1.41061	0.0320064	72hr
GSE111062	AT5G42270	-1.41169	0.0228335	24hr
GSE111062	AT1G07510	-1.42255	0.000338712	24hr
GSE111062	AT4G18280	-1.43525	0.0305561	0.5hr
GSE111062	AT3G50910	-1.43638	0.0194317	72hr
GSE111062	AT5G16930	-1.44081	0.00369144	6hr
GSE111062	AT3G14720	-1.45127	0.0147605	72hr
GSE111062	AT1G23710	-1.4531	0.0404929	0.5hr
GSE111062	AT4G16490	-1.46731	0.00973505	0.5hr
GSE111062	AT1G73990	-1.47	0.00488621	12hr
GSE111062	AT5G20190	-1.48394	0.0208792	0.5hr
GSE111062	AT2G46370	-1.51028	0.000116331	0.5hr
GSE111062	AT4G02280	-1.51324	0.0365939	72hr
GSE111062	AT5G13370	-1.52	0.0425252	12hr
GSE111062	AT5G02950	-1.52189	0.0227272	0.5hr
GSE111062	AT4G17550	-1.52385	0.0374345	0.5hr
GSE111062	AT4G13230	-1.54	0.037594	12hr
GSE111062	AT1G56510	-1.55816	0.000200443	0.5hr
GSE111062	AT1G54100	-1.5605	0.0239275	72hr
GSE111062	AT1G76570	-1.56108	0.00453249	24hr
GSE111062	AT1G64810	-1.56502	0.0178794	72hr
GSE111062	AT4G27350	-1.56762	0.00656928	0.5hr
GSE111062	AT5G13740	-1.57169	0.0182162	72hr
GSE111062	AT3G14690	-1.58094	0.0193914	6hr
GSE111062	AT3G13330	-1.58147	0.0347779	24hr
GSE111062	AT1G20160	-1.59055	0.024095	24hr
GSE111062	AT1G69790	-1.59861	0.0468926	72hr
GSE111062	AT1G30040	-1.61361	0.000629734	48hr
GSE111062	AT2G02300	-1.63316	0.0025764	24hr
GSE111062	AT5G47450	-1.64399	0.0385175	6hr
GSE111062	AT1G10370	-1.65268	0.0484295	6hr
GSE111062	AT1G32870	-1.67	0.0288952	12hr
GSE111062	AT3G23920	-1.6703	0.000251644	72hr
GSE111062	AT5G52310	-1.69	0.0217131	12hr
GSE111062	AT4G19230	-1.69774	0.0443535	24hr
GSE111062	AT3G09350	-1.6978	0.0094921	48hr
GSE111062	AT2G41040	-1.70987	0.00224902	72hr
GSE111062	AT3G12520	-1.71005	0.0121302	72hr
GSE111062	AT5G05365	-1.7216	0.0356219	6hr
GSE111062	AT5G13490	-1.72425	0.0111367	6hr
GSE111062	AT2G39650	-1.7563	0.014275	0.5hr
GSE111062	AT1G72770	-1.76752	0.000245104	0.5hr
GSE111062	AT3G63380	-1.78062	3.92266e-06	48hr
GSE111062	AT2G30540	-1.78645	0.0205591	72hr
GSE111062	AT1G67360	-1.79921	0.000555559	48hr
GSE111062	AT1G06430	-1.80456	5.96062e-05	72hr
GSE111062	AT5G67480	-1.81109	0.00137463	48hr
GSE111062	AT4G27560	-1.81246	0.0145299	72hr
GSE111062	AT3G56290	-1.83153	0.0161037	6hr
GSE111062	AT1G67360	-1.83159	0.00140482	72hr
GSE111062	AT1G69870	-1.83355	0.00646008	6hr
GSE111062	AT3G13080	-1.85807	0.0253136	24hr
GSE111062	AT4G34710	-1.86524	0.0346036	72hr
GSE111062	AT1G20823	-1.88782	0.00152011	0.5hr
GSE111062	AT5G04150	-1.92331	0.00597737	72hr
GSE111062	AT3G05640	-1.94	0.00591104	12hr
GSE111062	AT3G10450	-1.94857	0.0134542	72hr
GSE111062	AT3G61920	-1.98931	0.0367399	6hr
GSE111062	AT5G40010	-2.02	0.00712841	12hr
GSE111062	AT4G13250	-2.04351	0.0214521	6hr
GSE111062	AT1G61930	-2.08189	0.00511636	72hr
GSE111062	AT1G17870	-2.0891	0.011494	48hr
GSE111062	AT2G40100	-2.10618	0.0256424	24hr
GSE111062	AT1G10220	-2.11925	0.0268162	24hr
GSE111062	AT2G36885	-2.12517	0.0319708	6hr
GSE111062	AT1G21400	-2.1467	0.00453621	72hr
GSE111062	AT1G14520	-2.16216	0.0329427	24hr
GSE111062	AT3G49570	-2.1854	0.008101	24hr
GSE111062	AT4G28790	-2.21654	0.000307525	48hr
GSE111062	AT1G54570	-2.26935	0.0399012	6hr
GSE111062	AT3G48700	-2.27796	0.0381851	24hr
GSE111062	AT2G34660	-2.28072	0.0324638	24hr
GSE111062	AT3G22910	-2.28551	0.00455885	6hr
GSE111062	AT5G61820	-2.30005	0.0181237	6hr
GSE111062	AT3G56260	-2.30486	0.0153416	0.5hr
GSE111062	AT1G77680	-2.33097	0.00745546	0.5hr
GSE111062	AT2G37260	-2.33521	0.00794126	24hr
GSE111062	AT4G34550	-2.36364	0.00317376	72hr
GSE111062	AT3G55120	-2.37	0.0236512	12hr
GSE111062	AT2G41040	-2.37758	0.0190833	24hr
GSE111062	AT1G65060	-2.41	0.00243808	12hr
GSE111062	AT1G47400	-2.42171	0.0065896	72hr
GSE111062	AT3G12580	-2.46704	0.0309021	72hr
GSE111062	AT5G24110	-2.48	0.00221615	12hr
GSE111062	AT3G50930	-2.53911	0.0447834	24hr
GSE111062	AT1G69260	-2.55012	0.0123698	6hr
GSE111062	AT1G62710	-2.59511	0.000924925	72hr
GSE111062	AT3G29575	-2.60457	0.0459719	0.5hr
GSE111062	AT2G37260	-2.61	0.0394629	12hr
GSE111062	AT3G28220	-2.63156	0.0127067	24hr
GSE111062	AT1G64660	-2.66744	0.000989953	24hr
GSE111062	AT2G23590	-2.70061	0.0291637	72hr
GSE111062	AT1G07150	-2.71488	0.0132534	0.5hr
GSE111062	AT4G23600	-2.74659	0.0141117	72hr
GSE111062	AT5G13930	-2.83	0.0390677	12hr
GSE111062	AT1G44350	-2.8987	0.0461184	24hr
GSE111062	AT2G23910	-2.90113	0.000721264	24hr
GSE111062	AT3G61890	-2.96729	0.00161817	0.5hr
GSE111062	AT5G55090	-2.98612	0.00254631	0.5hr
GSE111062	AT4G15248	-3.0191	0.019267	0.5hr
GSE111062	AT1G15990	-3.05981	0.0104962	0.5hr
GSE111062	ATCG00370	-3.05981	0.0107403	0.5hr
GSE111062	AT4G12000	-3.06106	0.0440551	0.5hr
GSE111062	AT1G02940	-3.08667	0.00015263	48hr
GSE111062	AT1G76960	-3.08857	0.0394913	72hr
GSE111062	AT5G52640	-3.09494	0.0029799	72hr
GSE111062	AT1G73480	-3.10593	0.0310651	0.5hr
GSE111062	AT1G04570	-3.13	5.79711e-05	12hr
GSE111062	AT3G44860	-3.1515	0.0446504	0.5hr
GSE111062	AT4G34550	-3.17618	6.81744e-05	6hr
GSE111062	AT1G60190	-3.18559	0.0278333	24hr
GSE111062	AT2G42540	-3.20129	0.000827898	72hr
GSE111062	AT1G73040	-3.23756	0.0338524	72hr
GSE111062	AT5G52310	-3.26958	0.0185248	0.5hr
GSE111062	AT4G37030	-3.27835	1.88053e-06	24hr
GSE111062	AT4G22880	-3.29251	0.0311069	72hr
GSE111062	AT3G48240	-3.36003	0.000276034	0.5hr
GSE111062	AT3G29590	-3.38067	0.00118773	72hr
GSE111062	AT5G42800	-3.38427	7.2354e-05	72hr
GSE111062	AT1G21120	-3.39895	0.00630645	0.5hr
GSE111062	AT1G45191	-3.45	0.000171593	12hr
GSE111062	AT1G01520	-3.48887	0.0122558	0.5hr
GSE111062	AT2G34360	-3.54043	0.000413545	48hr
GSE111062	AT3G27250	-3.54996	0.00248906	72hr
GSE111062	AT1G71520	-3.58421	0.0139863	24hr
GSE111062	AT4G14090	-3.6122	0.0230729	72hr
GSE111062	AT1G36610	-3.63316	5.479e-06	24hr
GSE111062	AT1G24070	-3.66137	0.000813497	24hr
GSE111062	AT3G10185	-3.70066	0.00159871	6hr
GSE111062	AT5G63130	-3.73128	0.0299473	0.5hr
GSE111062	AT1G80130	-3.73721	0.00828203	48hr
GSE111062	AT5G40790	-3.82245	0.0173129	24hr
GSE111062	AT1G49150	-3.8405	0.0124852	48hr
GSE111062	AT5G54060	-3.84245	0.00733635	72hr
GSE111062	AT1G69260	-3.87764	0.0336553	0.5hr
GSE111062	AT4G21680	-3.99	0.0108056	12hr
GSE111062	AT5G40000	-4.05985	0.0277154	0.5hr
GSE111062	AT1G52890	-4.22573	0.018765	48hr
GSE111062	AT5G07990	-4.32	0.00253194	12hr
GSE111062	AT1G07430	-4.45	0.00135045	12hr
GSE111062	AT5G13210	-4.46426	0.00921913	48hr
GSE111062	AT3G25795	-4.59765	0.0420412	24hr
GSE111062	AT2G20800	-4.64353	0.00132293	24hr
GSE111062	AT5G24640	-4.80531	0.0352013	24hr
GSE111062	AT2G36750	-4.83471	0.000961711	72hr
GSE111062	AT3G25795	-4.85	1.17835e-06	12hr
GSE111062	AT1G09500	-4.91621	0.0163215	72hr
GSE111062	AT3G63060	-5.0069	0.0435463	0.5hr
GSE111062	AT1G52890	-5.0487	0.0315636	72hr
GSE111062	AT1G02940	-5.12	0.0203492	12hr
GSE111062	AT1G07900	-5.12285	0.0347669	0.5hr
GSE111062	AT3G22840	-5.13446	0.00278723	6hr
GSE111062	AT1G07430	-5.22189	1.78744e-06	48hr
GSE111062	AT5G50360	-5.41768	0.0142739	6hr
GSE111062	AT2G37870	-5.5734	0.00888675	48hr
GSE111062	AT2G37770	-5.57484	0.0136822	6hr
GSE111062	AT2G04050	-5.69197	1.37244e-05	24hr
GSE111062	AT2G04050	-5.91068	0.000193557	48hr
GSE111062	AT2G33380	-6.08025	0.018219	0.5hr
GSE111062	AT2G20880	-6.80638	3.78e-05	0.5hr
GSE111062	AT5G53710	-6.85097	0.0125732	0.5hr
GSE111062	AT5G19470	-7.17	0.033451	12hr
GSE111062	AT1G55230	-7.63205	0.000784952	48hr
GSE111062	AT4G16590	-8.38371	0.00360123	72hr
GSE111062	AT1G61800	-8.47592	0.0164118	48hr
GSE111062	AT4G16590	-8.70121	0.00122082	48hr
GSE111062	AT1G61800	-8.96511	0.0474104	72hr
GSE111062	AT5G59310	-10.6139	4.92095e-05	6hr
GSE117296	AT4G16146	3.11442	9.53941e-05	local 2min regulation
GSE117296	AT4G16146	3.08761	0.0442364	systemic 2min regulation
GSE117296	AT3G13000	2.90423	0.00442968	local 2min regulation
GSE117296	AT3G44990	2.85822	0.000290869	local 2min regulation
GSE117296	AT5G53450	2.85297	0.00165462	systemic 2min regulation
GSE117296	AT1G51140	2.78974	0.00920645	local 2min regulation
GSE117296	AT4G26530	2.78779	0.00138385	systemic 2min regulation
GSE117296	AT4G26530	2.74097	0.000824184	local 2min regulation
GSE117296	AT3G13470	2.70047	1.22243e-06	local 2min regulation
GSE117296	AT1G53700	2.67187	0.0241018	local 8min regulation
GSE117296	AT1G07367	2.66867	0.0209538	local 2min regulation
GSE117296	AT1G78930	2.66327	1.07358e-05	systemic 2min regulation
GSE117296	AT2G24120	2.65988	4.84076e-06	local 2min regulation
GSE117296	AT3G03780	2.64738	0.00886095	local 2min regulation
GSE117296	AT2G19670	2.62652	0.00244479	local 2min regulation
GSE117296	AT5G13740	2.57751	2.0661e-09	systemic 2min regulation
GSE117296	AT1G53700	2.56595	0.00530566	local 4min regulation
GSE117296	AT1G23390	2.56355	0.00340457	systemic 2min regulation
GSE117296	AT1G51140	2.50893	3.66991e-06	systemic 2min regulation
GSE117296	AT2G32100	2.50645	0.00986362	systemic 2min regulation
GSE117296	AT2G32990	2.48648	0.0064927	local 2min regulation
GSE117296	AT3G03780	2.48029	5.1951e-05	systemic 2min regulation
GSE117296	AT1G31173	2.47684	0.00691532	local 2min regulation
GSE117296	AT3G23810	2.46023	0.000166111	local 2min regulation
GSE117296	AT3G44990	2.45827	0.00125584	systemic 2min regulation
GSE117296	AT5G53450	2.45354	0.00168378	local 2min regulation
GSE117296	AT1G08610	2.40962	1.77956e-05	local 2min regulation
GSE117296	AT2G29300	2.38511	0.00674951	local 2min regulation
GSE117296	AT1G47400	2.36345	0.0182793	local 2min regulation
GSE117296	AT3G04355	2.35648	0.000143952	local 8min regulation
GSE117296	AT3G62070	2.35189	0.000799293	local 2min regulation
GSE117296	AT4G16146	2.33994	0.00052643	local 8min regulation
GSE117296	AT5G13740	2.33608	9.88615e-05	local 2min regulation
GSE117296	AT3G06530	2.3239	0.0001728	local 2min regulation
GSE117296	AT1G23390	2.31466	2.99553e-05	local 2min regulation
GSE117296	AT1G73325	2.30279	0.0184981	local 2min regulation
GSE117296	AT5G05270	2.2931	8.07538e-06	systemic 2min regulation
GSE117296	AT1G65060	2.28644	0.00347303	systemic 2min regulation
GSE117296	AT1G69200	2.27607	0.0051364	local 2min regulation
GSE117296	AT2G29310	2.27428	0.0104621	systemic 2min regulation
GSE117296	AT5G24155	2.26049	0.000644722	local 2min regulation
GSE117296	AT2G44080	2.22867	0.00686377	local 4min regulation
GSE117296	AT5G24155	2.22675	0.0412806	systemic 2min regulation
GSE117296	AT2G04030	2.22253	1.8746e-08	local 2min regulation
GSE117296	AT3G18600	2.17999	0.000131213	local 2min regulation
GSE117296	AT3G18290	2.17829	0.000360742	systemic 2min regulation
GSE117296	AT2G28000	2.17026	0.0145942	local 2min regulation
GSE117296	AT2G42540	2.16173	0.000149409	local 2min regulation
GSE117296	AT5G12110	2.15882	7.94952e-05	local 2min regulation
GSE117296	AT3G06530	2.15834	0.00831418	systemic 2min regulation
GSE117296	AT5G45960	2.13869	0.00414101	systemic 2min regulation
GSE117296	AT5G20630	2.13851	5.75174e-05	local 2min regulation
GSE117296	AT3G17170	2.12913	0.0215035	local 2min regulation
GSE117296	AT2G18890	2.11433	0.000400545	local 2min regulation
GSE117296	AT3G52370	2.10405	0.0311167	local 2min regulation
GSE117296	AT3G13470	2.09064	0.0404578	systemic 2min regulation
GSE117296	AT1G68520	2.09012	0.000203413	local 2min regulation
GSE117296	AT4G04020	2.08917	0.00148378	systemic 2min regulation
GSE117296	AT1G13608	2.06567	0.0130776	local 4min regulation
GSE117296	AT1G31173	2.06452	0.0112013	local 8min regulation
GSE117296	AT2G03310	2.0576	0.000867567	systemic 2min regulation
GSE117296	AT2G04030	2.03096	0.000180045	systemic 2min regulation
GSE117296	AT3G09540	2.02967	0.00794756	local 2min regulation
GSE117296	AT2G27840	2.02828	0.00298291	local 2min regulation
GSE117296	AT3G59670	2.02139	0.000508714	systemic 2min regulation
GSE117296	AT3G25770	2.01761	0.0119776	local 2min regulation
GSE117296	AT5G64080	1.99391	0.0315437	local 2min regulation
GSE117296	AT5G08610	1.99292	0.0004963	local 2min regulation
GSE117296	AT3G03820	1.98593	0.00177586	local 8min regulation
GSE117296	AT1G67750	1.98575	0.0165829	systemic 2min regulation
GSE117296	AT3G23810	1.97844	4.15352e-05	systemic 2min regulation
GSE117296	AT4G13750	1.9717	0.000244839	local 2min regulation
GSE117296	AT3G18290	1.96005	0.0003501	local 2min regulation
GSE117296	AT5G13930	1.95731	0.0337161	systemic 2min regulation
GSE117296	AT3G57150	1.95391	0.000710577	local 2min regulation
GSE117296	AT1G03360	1.94111	0.000148497	systemic 2min regulation
GSE117296	AT4G13750	1.94065	0.01127	systemic 2min regulation
GSE117296	AT1G16350	1.93878	0.000507071	local 2min regulation
GSE117296	AT3G44750	1.93587	9.98874e-05	systemic 2min regulation
GSE117296	AT3G18600	1.92795	0.000827221	systemic 2min regulation
GSE117296	AT1G52930	1.91759	0.00184526	local 2min regulation
GSE117296	AT2G24762	1.91624	0.00394918	local 2min regulation
GSE117296	AT2G23010	1.91294	0.0026	systemic 2min regulation
GSE117296	AT5G55730	1.90956	0.000207847	local 2min regulation
GSE117296	AT1G70820	1.9093	0.000215044	local 2min regulation
GSE117296	AT3G24460	1.90795	0.000283959	local 2min regulation
GSE117296	AT4G25340	1.90129	0.0109335	systemic 2min regulation
GSE117296	AT3G18130	1.90059	0.0225839	local 2min regulation
GSE117296	AT3G52370	1.89834	6.10597e-06	systemic 2min regulation
GSE117296	AT4G39980	1.89114	9.08345e-05	systemic 2min regulation
GSE117296	AT5G45950	1.88457	0.000460446	local 2min regulation
GSE117296	AT1G55260	1.8841	4.45242e-05	local 2min regulation
GSE117296	AT4G04940	1.88119	0.0197031	local 2min regulation
GSE117296	AT2G02150	1.88028	0.0281895	systemic 2min regulation
GSE117296	AT1G55020	1.87749	0.00555604	local 2min regulation
GSE117296	AT3G55690	1.87732	0.0289954	local 2min regulation
GSE117296	AT1G78570	1.87326	3.94258e-05	systemic 2min regulation
GSE117296	AT5G67190	1.87305	0.000141228	systemic 2min regulation
GSE117296	AT4G18270	1.87229	0.00373836	local 2min regulation
GSE117296	AT5G11790	1.87202	0.00011775	local 2min regulation
GSE117296	AT1G56110	1.86697	8.17761e-05	systemic 2min regulation
GSE117296	AT2G25900	1.86529	0.000500641	systemic 2min regulation
GSE117296	AT1G56110	1.86428	0.000113824	local 2min regulation
GSE117296	AT2G14247	1.86203	0.0042362	systemic 2min regulation
GSE117296	AT3G59670	1.85826	0.00187675	local 2min regulation
GSE117296	AT4G04020	1.85806	0.00143907	local 2min regulation
GSE117296	AT1G69830	1.85749	0.0184331	local 2min regulation
GSE117296	AT3G12270	1.8554	6.01776e-05	local 2min regulation
GSE117296	AT1G80270	1.8495	0.00695425	local 2min regulation
GSE117296	AT5G05250	1.84643	0.00255998	systemic 2min regulation
GSE117296	AT1G49500	1.84609	0.00191696	local 2min regulation
GSE117296	AT1G68520	1.84574	0.0360247	systemic 2min regulation
GSE117296	AT1G52930	1.83729	0.0324424	systemic 2min regulation
GSE117296	AT5G05580	1.83601	1.17485e-05	local 2min regulation
GSE117296	AT5G08610	1.83431	0.00088545	systemic 2min regulation
GSE117296	AT1G73830	1.82782	0.00285867	local 8min regulation
GSE117296	AT1G70820	1.82233	0.0291423	systemic 2min regulation
GSE117296	AT5G05250	1.82056	4.19746e-07	local 2min regulation
GSE117296	AT5G49910	1.80295	5.38537e-05	local 2min regulation
GSE117296	AT3G24460	1.80024	0.0244595	systemic 2min regulation
GSE117296	AT1G02820	1.7999	0.000192103	local 2min regulation
GSE117296	AT5G67190	1.79914	0.00100964	local 2min regulation
GSE117296	AT3G56070	1.79847	0.0376204	systemic 2min regulation
GSE117296	AT4G04940	1.79257	9.67808e-05	systemic 2min regulation
GSE117296	AT1G75490	1.79123	3.49066e-05	local 8min regulation
GSE117296	AT3G12580	1.78891	6.35502e-05	local 2min regulation
GSE117296	AT2G23000	1.78795	0.000201516	local 2min regulation
GSE117296	AT1G79150	1.78635	0.00118715	local 2min regulation
GSE117296	AT3G21300	1.78362	0.0257461	local 2min regulation
GSE117296	AT4G25340	1.78045	0.00823321	local 2min regulation
GSE117296	AT5G55920	1.77963	0.00149141	local 2min regulation
GSE117296	AT4G16370	1.77097	1.51839e-07	systemic 2min regulation
GSE117296	AT1G73830	1.76921	0.00098715	local 4min regulation
GSE117296	AT1G69200	1.76892	0.00396558	systemic 2min regulation
GSE117296	AT1G69490	1.7675	0.0112963	systemic 2min regulation
GSE117296	AT5G53120	1.76613	0.000112317	systemic 2min regulation
GSE117296	AT1G75900	1.76549	0.00652724	local 2min regulation
GSE117296	AT1G48920	1.76301	0.000108403	local 2min regulation
GSE117296	AT1G55260	1.76147	0.00326891	systemic 2min regulation
GSE117296	AT1G73600	1.7574	0.00441679	systemic 2min regulation
GSE117296	AT3G54820	1.75707	0.00122792	systemic 2min regulation
GSE117296	AT2G37040	1.75404	0.000987972	local 2min regulation
GSE117296	AT4G10390	1.75111	0.0113019	local 2min regulation
GSE117296	AT2G23340	1.75084	0.0289016	local 2min regulation
GSE117296	AT2G42710	1.74977	0.0169621	local 2min regulation
GSE117296	AT1G48920	1.74738	2.53859e-08	systemic 2min regulation
GSE117296	AT1G02205	1.74209	0.0243803	local 2min regulation
GSE117296	AT5G27120	1.73822	0.0098911	systemic 2min regulation
GSE117296	AT1G15440	1.737	1.61596e-05	local 2min regulation
GSE117296	AT3G57150	1.73158	0.000709736	systemic 2min regulation
GSE117296	AT1G69830	1.7305	0.0288809	systemic 2min regulation
GSE117296	AT4G18270	1.7299	0.00929542	systemic 2min regulation
GSE117296	AT4G34290	1.72935	0.00269151	local 2min regulation
GSE117296	AT5G02190	1.72902	0.00803484	local 8min regulation
GSE117296	AT5G25130	1.72873	6.75386e-05	local 2min regulation
GSE117296	AT3G23990	1.72862	0.00110501	local 2min regulation
GSE117296	AT1G04310	1.72674	0.0101083	local 4min regulation
GSE117296	AT4G28250	1.72251	0.00589463	local 2min regulation
GSE117296	AT5G46580	1.71902	0.000624269	local 2min regulation
GSE117296	AT1G72040	1.71828	0.00181341	systemic 2min regulation
GSE117296	AT3G03820	1.715	0.0104577	local 2min regulation
GSE117296	AT1G73600	1.71405	0.0038908	local 2min regulation
GSE117296	AT1G23205	1.71281	0.00773654	local 2min regulation
GSE117296	AT1G72040	1.70886	7.53141e-10	local 2min regulation
GSE117296	AT3G47640	1.70516	0.000576442	systemic 4min regulation
GSE117296	AT1G79150	1.70308	0.00136966	systemic 2min regulation
GSE117296	AT5G11790	1.69664	0.000513216	systemic 2min regulation
GSE117296	AT1G63660	1.69582	0.00697201	systemic 2min regulation
GSE117296	AT5G55920	1.69085	0.00746097	systemic 2min regulation
GSE117296	AT1G02820	1.68997	0.000240915	systemic 2min regulation
GSE117296	AT1G75490	1.68347	0.0141411	local 4min regulation
GSE117296	AT3G23990	1.6786	0.0101621	systemic 2min regulation
GSE117296	AT2G29300	1.67432	8.82708e-08	systemic 2min regulation
GSE117296	AT4G26780	1.66538	0.00479089	systemic 2min regulation
GSE117296	AT5G56010	1.66359	0.000450135	local 2min regulation
GSE117296	AT5G08180	1.66335	0.00151076	systemic 2min regulation
GSE117296	AT3G63210	1.65658	0.000631614	systemic 2min regulation
GSE117296	AT3G47640	1.65466	0.00524133	systemic 2min regulation
GSE117296	AT5G08180	1.64753	0.00331025	local 2min regulation
GSE117296	AT4G39980	1.6383	0.00215138	local 2min regulation
GSE117296	AT4G31210	1.63619	0.0344915	local 2min regulation
GSE117296	AT4G20020	1.63543	0.0365022	local 2min regulation
GSE117296	AT1G63660	1.63243	0.00212622	local 2min regulation
GSE117296	AT3G03060	1.63128	0.0264218	systemic 2min regulation
GSE117296	AT1G64390	1.63105	9.68614e-05	local 2min regulation
GSE117296	AT1G16350	1.63067	0.00446155	systemic 2min regulation
GSE117296	AT3G57660	1.62637	0.000383573	local 2min regulation
GSE117296	AT2G29170	1.62442	2.26749e-06	systemic 2min regulation
GSE117296	AT4G00620	1.62167	0.0131001	systemic 2min regulation
GSE117296	AT5G53120	1.62142	0.0489876	local 2min regulation
GSE117296	AT1G04310	1.62106	0.00520456	systemic 4min regulation
GSE117296	AT3G21540	1.61729	0.00648249	systemic 2min regulation
GSE117296	AT4G16630	1.61153	0.00432615	local 2min regulation
GSE117296	AT1G31660	1.61059	0.0118067	local 2min regulation
GSE117296	AT3G05060	1.60959	8.95839e-06	local 2min regulation
GSE117296	AT1G70290	1.60939	0.00128041	local 2min regulation
GSE117296	AT1G78440	1.60874	0.0464217	local 2min regulation
GSE117296	AT4G29510	1.60857	7.90223e-05	systemic 2min regulation
GSE117296	AT1G15440	1.60573	0.0156617	systemic 2min regulation
GSE117296	AT5G44110	1.60494	4.97676e-05	local 4min regulation
GSE117296	AT3G18850	1.60006	0.00573553	local 2min regulation
GSE117296	AT5G56010	1.59994	0.000133441	systemic 2min regulation
GSE117296	AT4G37450	1.59836	0.00580777	local 2min regulation
GSE117296	AT1G10370	1.59484	0.0180257	local 2min regulation
GSE117296	AT3G23580	1.59453	5.62527e-05	systemic 2min regulation
GSE117296	AT3G16810	1.58569	0.000102853	systemic 2min regulation
GSE117296	AT1G48460	1.58386	0.000110482	systemic 2min regulation
GSE117296	AT1G55020	1.58174	0.0139244	systemic 2min regulation
GSE117296	AT4G16370	1.57751	0.00190623	local 2min regulation
GSE117296	AT5G27120	1.57502	5.70877e-07	local 2min regulation
GSE117296	AT5G49910	1.57411	0.0257829	systemic 2min regulation
GSE117296	AT1G63810	1.57277	0.0183969	systemic 2min regulation
GSE117296	AT2G18900	1.57203	0.000563698	local 2min regulation
GSE117296	AT5G19190	1.57157	0.0319362	local 8min regulation
GSE117296	AT5G19190	1.57014	0.0404623	local 2min regulation
GSE117296	AT2G23000	1.56916	9.79439e-06	systemic 2min regulation
GSE117296	AT3G05130	1.56849	0.0316731	local 2min regulation
GSE117296	AT5G22270	1.56632	0.000240525	local 8min regulation
GSE117296	AT1G31660	1.56458	0.00668395	systemic 2min regulation
GSE117296	AT1G12090	1.56412	0.000547379	local 2min regulation
GSE117296	AT5G57280	1.56182	0.00610015	systemic 2min regulation
GSE117296	AT3G10050	1.56166	0.0430388	local 2min regulation
GSE117296	AT3G55010	1.55342	3.54726e-05	local 2min regulation
GSE117296	AT5G45950	1.54351	0.00670186	systemic 2min regulation
GSE117296	AT5G55280	1.54333	0.000522638	local 2min regulation
GSE117296	AT1G06720	1.54216	0.00711866	local 2min regulation
GSE117296	AT1G47395	1.54128	0.00228751	local 2min regulation
GSE117296	AT4G27560	1.5396	0.0107479	systemic 2min regulation
GSE117296	AT2G34357	1.53745	0.00434092	systemic 2min regulation
GSE117296	AT4G20020	1.53403	0.00168677	systemic 2min regulation
GSE117296	AT4G27560	1.53377	0.0131769	local 2min regulation
GSE117296	AT4G36360	1.52918	2.52947e-06	local 2min regulation
GSE117296	AT3G05060	1.52874	0.00253432	systemic 2min regulation
GSE117296	AT4G05410	1.52094	0.0277049	systemic 2min regulation
GSE117296	AT3G47640	1.51993	0.00384055	local 2min regulation
GSE117296	AT3G55510	1.51692	0.0232591	local 2min regulation
GSE117296	AT4G15620	1.51545	0.00196914	systemic 2min regulation
GSE117296	AT5G03760	1.51448	0.00177159	local 2min regulation
GSE117296	AT2G22870	1.51436	0.0120846	systemic 2min regulation
GSE117296	AT2G28000	1.50997	0.00035671	systemic 2min regulation
GSE117296	AT2G34357	1.50233	4.31427e-05	local 2min regulation
GSE117296	AT4G27490	1.4983	0.00410395	systemic 2min regulation
GSE117296	AT5G23070	1.49739	0.00836072	local 2min regulation
GSE117296	AT5G14520	1.4924	0.0132964	local 2min regulation
GSE117296	AT5G67330	1.4907	0.0293888	systemic 2min regulation
GSE117296	AT5G44050	1.48578	0.0330868	local 2min regulation
GSE117296	AT5G04130	1.48558	0.0145652	local 2min regulation
GSE117296	AT4G30990	1.48228	0.00315437	systemic 2min regulation
GSE117296	AT1G24625	1.48104	0.00131689	local 2min regulation
GSE117296	AT2G40360	1.479	0.0167592	systemic 2min regulation
GSE117296	AT4G15770	1.4787	0.00538369	systemic 2min regulation
GSE117296	AT2G36830	1.47631	1.24104e-05	local 2min regulation
GSE117296	AT4G24830	1.47545	0.000241177	local 2min regulation
GSE117296	AT5G11240	1.47311	0.00362652	systemic 2min regulation
GSE117296	AT2G03310	1.47106	0.0194397	local 2min regulation
GSE117296	AT2G45560	1.47005	0.00845674	systemic 2min regulation
GSE117296	AT2G30766	1.46883	0.00105641	local 2min regulation
GSE117296	AT5G58370	1.46815	3.23848e-05	local 2min regulation
GSE117296	AT1G25425	1.46734	0.0175283	systemic 2min regulation
GSE117296	AT4G34250	1.45556	0.00796784	systemic 2min regulation
GSE117296	AT1G33170	1.45462	0.00227257	local 2min regulation
GSE117296	AT5G67190	1.45343	0.0147693	local 8min regulation
GSE117296	AT5G13740	1.44858	5.9561e-08	systemic 4min regulation
GSE117296	AT1G60590	1.44396	0.0208299	local 2min regulation
GSE117296	AT5G08620	1.44368	0.0111805	local 2min regulation
GSE117296	AT4G16630	1.44367	0.00287207	systemic 2min regulation
GSE117296	AT3G55120	1.43497	0.0191395	systemic 2min regulation
GSE117296	AT1G28395	1.4327	5.88285e-05	local 2min regulation
GSE117296	AT2G40360	1.43061	1.41708e-05	local 2min regulation
GSE117296	AT5G56100	1.42999	0.00179988	systemic 2min regulation
GSE117296	AT4G13493	1.42874	0.00320579	local 2min regulation
GSE117296	AT5G55960	1.42779	0.00131139	local 2min regulation
GSE117296	AT2G37040	1.42713	7.337e-05	systemic 2min regulation
GSE117296	AT1G31970	1.42645	0.00592029	local 2min regulation
GSE117296	AT5G67180	1.42581	0.0303514	local 2min regulation
GSE117296	AT3G25717	1.42543	0.0498375	systemic 2min regulation
GSE117296	AT1G14980	1.42539	0.000932397	local 2min regulation
GSE117296	AT1G63810	1.42513	0.00078203	local 2min regulation
GSE117296	AT4G17340	1.42358	0.000554849	systemic 2min regulation
GSE117296	AT3G47640	1.42336	0.00117334	local 4min regulation
GSE117296	AT2G37790	1.42278	0.0182097	local 2min regulation
GSE117296	AT2G43110	1.42242	0.0122136	systemic 2min regulation
GSE117296	AT3G03060	1.42157	0.0287043	local 2min regulation
GSE117296	AT3G04770	1.42091	9.41792e-05	local 2min regulation
GSE117296	AT2G19870	1.4198	0.000190224	local 2min regulation
GSE117296	AT1G10490	1.41864	0.0153986	local 2min regulation
GSE117296	AT5G04130	1.41754	0.0247663	systemic 2min regulation
GSE117296	AT1G49500	1.41656	0.0249726	systemic 2min regulation
GSE117296	AT3G18130	1.41455	0.000153018	systemic 2min regulation
GSE117296	AT1G74890	1.41412	0.00865833	local 8min regulation
GSE117296	AT4G39510	1.41347	0.0243493	local 2min regulation
GSE117296	AT4G25730	1.41335	0.00317184	systemic 2min regulation
GSE117296	AT3G58660	1.4108	0.00809777	local 2min regulation
GSE117296	AT2G40460	1.41076	0.00216605	local 2min regulation
GSE117296	AT2G29290	1.40826	6.92018e-07	local 2min regulation
GSE117296	AT5G14520	1.40551	2.18676e-05	systemic 2min regulation
GSE117296	AT3G23510	1.40538	0.00073773	local 2min regulation
GSE117296	AT2G42710	1.40375	0.0140808	systemic 2min regulation
GSE117296	AT4G29510	1.40284	0.00302092	local 2min regulation
GSE117296	AT3G10530	1.40156	0.0396534	systemic 2min regulation
GSE117296	AT1G30530	1.39858	0.000994313	systemic 2min regulation
GSE117296	AT1G64980	1.39786	0.0186688	local 2min regulation
GSE117296	AT1G56210	1.38856	0.0236729	local 2min regulation
GSE117296	AT2G37180	1.3861	0.0081943	local 2min regulation
GSE117296	AT3G21240	1.38349	0.00715908	local 2min regulation
GSE117296	AT1G65060	1.38112	0.00234153	systemic 4min regulation
GSE117296	AT1G74890	1.37754	0.00220369	local 2min regulation
GSE117296	AT1G29940	1.37482	0.00422813	local 2min regulation
GSE117296	AT5G15550	1.37205	0.0397633	systemic 2min regulation
GSE117296	AT2G40460	1.37111	0.00956109	systemic 2min regulation
GSE117296	AT3G61780	1.37097	0.00447699	local 2min regulation
GSE117296	AT1G35180	1.37095	0.0418719	systemic 2min regulation
GSE117296	AT5G44050	1.37012	0.00153473	systemic 2min regulation
GSE117296	AT1G10370	1.36741	0.0119827	systemic 2min regulation
GSE117296	AT4G01037	1.36662	0.000416729	local 2min regulation
GSE117296	AT1G11790	1.36604	0.00174637	systemic 2min regulation
GSE117296	AT3G58660	1.36577	0.0015649	systemic 2min regulation
GSE117296	AT4G16146	1.36494	4.55063e-05	local 4min regulation
GSE117296	AT4G23020	1.36339	0.01355	local 2min regulation
GSE117296	AT1G06720	1.36183	0.0326227	systemic 2min regulation
GSE117296	AT5G15550	1.35875	0.0239387	local 2min regulation
GSE117296	AT5G62070	1.35812	0.000164496	systemic 2min regulation
GSE117296	AT3G15570	1.35766	0.00374786	systemic 2min regulation
GSE117296	AT1G69070	1.35159	0.00103642	local 2min regulation
GSE117296	AT1G13810	1.35107	0.00152188	systemic 2min regulation
GSE117296	AT2G36880	1.35012	0.00225405	local 2min regulation
GSE117296	AT2G40890	1.34912	1.13761e-05	local 2min regulation
GSE117296	AT1G78570	1.34669	0.0165996	local 2min regulation
GSE117296	AT3G24420	1.34579	0.000313081	systemic 8min regulation
GSE117296	AT1G59990	1.34347	0.000875997	local 2min regulation
GSE117296	AT5G56030	1.34266	0.000279346	systemic 2min regulation
GSE117296	AT1G64980	1.33655	0.0136972	systemic 2min regulation
GSE117296	AT1G22360	1.336	9.83607e-05	systemic 2min regulation
GSE117296	AT4G01080	1.33584	0.0133608	systemic 2min regulation
GSE117296	AT2G42530	1.3346	0.000387777	local 2min regulation
GSE117296	AT4G34290	1.32747	0.011874	systemic 2min regulation
GSE117296	AT1G54570	1.32711	0.0129828	systemic 2min regulation
GSE117296	AT1G20220	1.32695	0.0472318	local 2min regulation
GSE117296	AT4G14740	1.32359	0.00113856	systemic 2min regulation
GSE117296	AT2G19870	1.32125	0.0269721	systemic 2min regulation
GSE117296	AT3G25230	1.31683	0.0279453	local 2min regulation
GSE117296	AT2G22870	1.31347	0.0227668	local 2min regulation
GSE117296	AT1G45191	1.31076	0.000533842	systemic 2min regulation
GSE117296	AT5G59130	1.31059	0.0192311	local 2min regulation
GSE117296	AT4G32920	1.30852	0.000602863	systemic 2min regulation
GSE117296	AT3G03840	1.30768	0.00277251	local 8min regulation
GSE117296	AT3G05165	1.30732	0.00390581	systemic 2min regulation
GSE117296	AT3G53830	1.30417	0.00376749	systemic 2min regulation
GSE117296	AT1G19350	1.30279	0.00244034	local 8min regulation
GSE117296	AT3G48500	1.30055	0.031476	systemic 2min regulation
GSE117296	AT5G16750	1.30006	0.0410943	local 2min regulation
GSE117296	AT3G21300	1.29842	0.0445539	systemic 2min regulation
GSE117296	AT5G67330	1.29758	0.000315584	local 2min regulation
GSE117296	AT3G06880	1.29653	0.0346548	local 2min regulation
GSE117296	AT3G13940	1.29611	0.00719437	systemic 2min regulation
GSE117296	AT2G29300	1.2955	0.00070128	systemic 8min regulation
GSE117296	AT3G53940	1.29473	0.0305356	systemic 2min regulation
GSE117296	AT3G06550	1.29393	0.00814813	local 2min regulation
GSE117296	AT4G02850	1.29371	0.0499775	local 2min regulation
GSE117296	AT3G19370	1.29353	0.00177775	local 2min regulation
GSE117296	AT1G51680	1.29348	1.28546e-05	local 2min regulation
GSE117296	AT5G55730	1.29277	0.020715	systemic 2min regulation
GSE117296	AT3G04770	1.29238	0.0302996	systemic 2min regulation
GSE117296	AT2G22250	1.2922	0.0387369	local 2min regulation
GSE117296	AT3G56990	1.29204	0.000175648	local 2min regulation
GSE117296	AT3G57490	1.28918	0.0286295	local 2min regulation
GSE117296	AT2G04240	1.28846	1.84651e-06	systemic 2min regulation
GSE117296	AT5G61950	1.28817	0.00451273	local 2min regulation
GSE117296	AT5G20720	1.28752	0.00689368	local 2min regulation
GSE117296	AT1G79490	1.28521	0.0322852	local 2min regulation
GSE117296	AT3G28760	1.28464	0.0229965	local 2min regulation
GSE117296	AT2G20450	1.28384	0.00123424	local 2min regulation
GSE117296	AT3G53260	1.28293	0.0431718	local 2min regulation
GSE117296	AT5G66540	1.28147	0.0332737	systemic 2min regulation
GSE117296	AT3G07310	1.28134	0.00595568	systemic 2min regulation
GSE117296	AT5G12080	1.28025	0.0445625	local 2min regulation
GSE117296	AT2G30230	1.27774	0.0413879	local 8min regulation
GSE117296	AT1G74560	1.27721	0.00162628	systemic 2min regulation
GSE117296	AT3G61820	1.27569	0.000830823	local 2min regulation
GSE117296	AT2G38240	1.27467	0.0282727	local 2min regulation
GSE117296	AT2G22250	1.27416	0.000911244	systemic 2min regulation
GSE117296	AT2G40890	1.27229	4.81772e-05	systemic 2min regulation
GSE117296	AT5G16750	1.26958	0.0032851	systemic 2min regulation
GSE117296	AT4G36360	1.26841	6.02913e-05	systemic 2min regulation
GSE117296	AT1G64970	1.26353	0.00107431	systemic 2min regulation
GSE117296	AT3G20540	1.26203	0.00200035	local 2min regulation
GSE117296	AT1G19350	1.26162	0.0209902	systemic 8min regulation
GSE117296	AT5G59130	1.25877	0.01004	systemic 2min regulation
GSE117296	AT3G28270	1.25754	0.0370407	local 2min regulation
GSE117296	AT3G46210	1.25644	0.00367712	systemic 2min regulation
GSE117296	AT2G20750	1.2564	0.00805792	local 2min regulation
GSE117296	AT1G79920	1.25519	0.000267658	local 2min regulation
GSE117296	AT5G02050	1.25399	0.0173211	systemic 2min regulation
GSE117296	AT1G33170	1.25251	0.00898567	systemic 2min regulation
GSE117296	AT1G48100	1.24921	0.0452689	local 4min regulation
GSE117296	AT2G35760	1.2481	0.00252352	systemic 2min regulation
GSE117296	AT1G28610	1.24622	0.00498692	local 2min regulation
GSE117296	AT1G31970	1.24388	0.0188218	systemic 2min regulation
GSE117296	AT1G68990	1.242	0.0125686	systemic 2min regulation
GSE117296	AT1G08130	1.23971	0.00211886	local 2min regulation
GSE117296	AT1G09900	1.23603	0.00508587	local 2min regulation
GSE117296	AT1G28395	1.23517	1.33715e-06	systemic 2min regulation
GSE117296	AT1G49760	1.23361	0.00112327	local 2min regulation
GSE117296	AT4G01560	1.23189	0.00403549	local 2min regulation
GSE117296	AT1G25260	1.23168	0.0120924	local 2min regulation
GSE117296	AT5G22650	1.23086	0.00322212	local 2min regulation
GSE117296	AT5G38530	1.23071	0.0269216	systemic 2min regulation
GSE117296	AT4G12730	1.23042	0.00210398	local 2min regulation
GSE117296	AT1G27470	1.22932	0.00687466	systemic 2min regulation
GSE117296	AT5G49665	1.22909	0.00705597	local 8min regulation
GSE117296	AT5G54160	1.22864	0.000491581	local 2min regulation
GSE117296	AT1G18800	1.22863	0.0013586	systemic 2min regulation
GSE117296	AT3G53830	1.22386	1.09585e-05	local 2min regulation
GSE117296	AT1G01500	1.22288	0.00459114	systemic 2min regulation
GSE117296	AT1G41830	1.22013	0.0433947	local 2min regulation
GSE117296	AT1G18360	1.21996	0.0391969	local 2min regulation
GSE117296	AT1G13250	1.21968	0.0200265	systemic 2min regulation
GSE117296	AT1G61870	1.21777	0.00887972	local 2min regulation
GSE117296	AT1G71030	1.21696	0.020593	systemic 2min regulation
GSE117296	AT4G20090	1.21568	0.0363146	local 2min regulation
GSE117296	AT5G54630	1.21553	1.19339e-05	systemic 2min regulation
GSE117296	AT5G55960	1.21155	0.00634338	systemic 2min regulation
GSE117296	AT3G63200	1.20937	0.0163226	local 8min regulation
GSE117296	AT3G20540	1.20835	0.0312286	systemic 2min regulation
GSE117296	AT4G38890	1.20781	0.000975017	local 2min regulation
GSE117296	AT1G19570	1.20488	0.017479	systemic 2min regulation
GSE117296	AT5G22100	1.20473	0.000845881	local 2min regulation
GSE117296	AT5G05990	1.20306	0.00195238	local 2min regulation
GSE117296	AT1G75280	1.20253	0.00729372	local 2min regulation
GSE117296	AT3G57940	1.20224	0.029683	systemic 2min regulation
GSE117296	AT3G57180	1.19951	0.0211067	local 2min regulation
GSE117296	AT5G13740	1.19468	0.000445778	local 4min regulation
GSE117296	AT5G08600	1.19448	0.00242226	local 2min regulation
GSE117296	AT1G78440	1.19237	0.0388328	systemic 2min regulation
GSE117296	AT3G07050	1.19018	0.00258847	systemic 2min regulation
GSE117296	AT1G64390	1.18906	0.0085374	systemic 2min regulation
GSE117296	AT5G08600	1.18867	0.0101345	systemic 2min regulation
GSE117296	AT3G13230	1.18843	0.0148024	systemic 2min regulation
GSE117296	AT3G19170	1.18834	0.0499029	local 2min regulation
GSE117296	AT4G01080	1.18833	0.0412092	local 2min regulation
GSE117296	AT3G17330	1.18523	1.34407e-07	local 2min regulation
GSE117296	AT3G17770	1.18369	0.0123358	systemic 2min regulation
GSE117296	AT3G10050	1.18355	0.0393432	systemic 2min regulation
GSE117296	AT2G36880	1.18302	3.3465e-05	systemic 2min regulation
GSE117296	AT1G26770	1.183	0.000224623	systemic 4min regulation
GSE117296	AT5G62350	1.18208	1.07724e-06	systemic 2min regulation
GSE117296	AT1G60640	1.18106	0.0203906	systemic 2min regulation
GSE117296	AT1G51680	1.17878	0.000188848	systemic 2min regulation
GSE117296	AT2G18630	1.17321	0.0270767	local 2min regulation
GSE117296	AT4G02930	1.16949	0.00631394	systemic 2min regulation
GSE117296	AT5G25350	1.16892	0.0327597	local 4min regulation
GSE117296	AT5G22270	1.16841	6.24789e-07	local 4min regulation
GSE117296	AT1G03220	1.1681	0.0164601	systemic 2min regulation
GSE117296	AT5G25280	1.16739	0.00144681	local 2min regulation
GSE117296	AT5G15750	1.16533	0.0427356	local 2min regulation
GSE117296	AT2G32990	1.16294	0.0394693	local 8min regulation
GSE117296	AT1G61870	1.16291	0.00143465	systemic 2min regulation
GSE117296	AT1G60590	1.16274	2.35237e-05	systemic 2min regulation
GSE117296	AT5G09590	1.16188	0.0035551	systemic 2min regulation
GSE117296	AT4G01560	1.15841	0.000702825	systemic 2min regulation
GSE117296	AT1G29320	1.15782	0.00706478	local 2min regulation
GSE117296	AT3G51870	1.15456	0.00758431	local 2min regulation
GSE117296	AT5G36910	1.15296	0.00417905	systemic 2min regulation
GSE117296	AT1G64880	1.15293	0.00280403	systemic 2min regulation
GSE117296	AT2G19860	1.15067	0.00117704	local 2min regulation
GSE117296	AT3G15460	1.14936	0.0187869	local 2min regulation
GSE117296	AT1G04310	1.14925	0.0152876	systemic 8min regulation
GSE117296	AT5G54910	1.14858	0.000143939	local 2min regulation
GSE117296	AT3G05640	1.14805	0.00530309	local 2min regulation
GSE117296	AT2G20670	1.14748	0.0273628	local 2min regulation
GSE117296	AT3G02060	1.14733	2.41795e-05	local 2min regulation
GSE117296	AT2G20670	1.14713	0.00102662	local 8min regulation
GSE117296	AT1G27470	1.14713	0.0217884	local 2min regulation
GSE117296	AT5G05990	1.14511	0.0226712	systemic 2min regulation
GSE117296	AT4G28450	1.14472	0.00060402	local 2min regulation
GSE117296	AT1G19570	1.14459	0.0268414	local 2min regulation
GSE117296	AT5G67420	1.14421	0.000597266	local 2min regulation
GSE117296	AT3G51800	1.14325	5.07991e-06	local 2min regulation
GSE117296	AT3G46740	1.14304	0.000881209	local 2min regulation
GSE117296	AT5G67420	1.14264	2.7918e-05	systemic 2min regulation
GSE117296	AT5G41670	1.14134	0.0299958	local 2min regulation
GSE117296	AT5G08620	1.13982	0.0171458	systemic 2min regulation
GSE117296	AT2G19750	1.13896	0.00596707	local 2min regulation
GSE117296	AT2G28450	1.13526	0.00272705	local 2min regulation
GSE117296	AT4G33010	1.13411	0.00347846	local 2min regulation
GSE117296	AT5G55280	1.13405	0.0327308	systemic 2min regulation
GSE117296	AT1G30530	1.13269	0.0154376	local 2min regulation
GSE117296	AT5G52470	1.13008	0.0235845	local 2min regulation
GSE117296	AT3G24420	1.13002	0.00144442	local 8min regulation
GSE117296	AT4G10770	1.12913	0.00212613	systemic 2min regulation
GSE117296	AT4G37910	1.12789	0.0233426	systemic 2min regulation
GSE117296	AT1G22410	1.12408	0.00468329	systemic 2min regulation
GSE117296	AT3G57000	1.12219	0.0450304	local 2min regulation
GSE117296	AT4G24830	1.12206	2.50613e-05	systemic 2min regulation
GSE117296	AT5G02180	1.12192	0.00607994	systemic 2min regulation
GSE117296	AT1G20450	1.1219	0.00134861	systemic 2min regulation
GSE117296	AT1G30070	1.12179	0.0320751	systemic 2min regulation
GSE117296	AT5G62070	1.12151	0.0359431	local 2min regulation
GSE117296	AT4G31700	1.11778	0.000786409	local 2min regulation
GSE117296	AT3G17330	1.11718	2.58392e-05	systemic 2min regulation
GSE117296	AT5G58590	1.11506	0.026072	systemic 2min regulation
GSE117296	AT1G55490	1.11369	0.00125024	local 2min regulation
GSE117296	AT5G55740	1.11239	0.0227161	local 2min regulation
GSE117296	AT1G29460	1.11114	0.000567904	local 8min regulation
GSE117296	AT3G06070	1.10913	0.00154002	local 8min regulation
GSE117296	AT4G10620	1.10841	0.00532998	systemic 2min regulation
GSE117296	AT4G09730	1.10841	0.0109828	systemic 2min regulation
GSE117296	AT5G52470	1.10822	0.000733864	systemic 2min regulation
GSE117296	AT1G06080	1.10817	0.00344618	local 2min regulation
GSE117296	AT3G07430	1.10793	0.000770441	local 2min regulation
GSE117296	AT5G03760	1.10567	0.00113133	systemic 2min regulation
GSE117296	AT2G14880	1.10534	0.026355	local 2min regulation
GSE117296	AT1G23205	1.1006	0.00184061	local 4min regulation
GSE117296	AT3G27280	1.10031	0.016635	local 2min regulation
GSE117296	AT1G03110	1.09652	0.0398361	systemic 2min regulation
GSE117296	AT2G33380	1.09536	0.000925299	systemic 2min regulation
GSE117296	AT1G32440	1.0953	0.00241208	local 2min regulation
GSE117296	AT3G07390	1.09435	0.00806077	systemic 2min regulation
GSE117296	AT1G09900	1.09405	0.00923958	systemic 2min regulation
GSE117296	AT4G23940	1.09152	0.009042	local 2min regulation
GSE117296	AT1G08580	1.09081	0.0112239	systemic 2min regulation
GSE117296	AT2G30490	1.08838	0.0222302	systemic 2min regulation
GSE117296	AT2G26840	1.08789	0.0171693	local 2min regulation
GSE117296	AT2G22240	1.08614	0.0488504	local 2min regulation
GSE117296	AT1G79060	1.08573	2.67805e-05	systemic 2min regulation
GSE117296	AT1G07070	1.08561	0.0324885	local 2min regulation
GSE117296	AT5G67280	1.0831	0.000146821	local 2min regulation
GSE117296	AT3G21460	1.07997	0.0241358	systemic 2min regulation
GSE117296	AT5G25280	1.07837	0.0377248	systemic 2min regulation
GSE117296	AT4G28240	1.07788	0.043408	systemic 2min regulation
GSE117296	AT2G38540	1.07632	0.00426828	systemic 2min regulation
GSE117296	AT3G18290	1.07468	0.00231171	systemic 4min regulation
GSE117296	AT5G54160	1.07229	0.000650498	systemic 2min regulation
GSE117296	AT4G02790	1.07183	0.00317624	local 2min regulation
GSE117296	AT3G17770	1.07007	0.0454578	local 2min regulation
GSE117296	AT3G57520	1.06929	0.00842175	local 2min regulation
GSE117296	AT5G09590	1.06928	0.00158377	local 2min regulation
GSE117296	AT3G51800	1.06651	0.0157877	systemic 2min regulation
GSE117296	AT4G12400	1.06425	0.00845761	local 2min regulation
GSE117296	AT2G29200	1.06418	0.00463494	local 2min regulation
GSE117296	AT2G34620	1.06219	0.0188494	local 2min regulation
GSE117296	AT3G14390	1.0589	3.59525e-07	local 2min regulation
GSE117296	AT4G19120	1.05888	0.0221596	local 8min regulation
GSE117296	AT1G23280	1.05799	0.00673284	systemic 2min regulation
GSE117296	AT3G05165	1.05658	0.00724768	local 2min regulation
GSE117296	AT1G78820	1.05331	8.8175e-05	local 2min regulation
GSE117296	AT5G39550	1.05262	0.022945	local 2min regulation
GSE117296	AT5G14050	1.05207	0.0161754	systemic 2min regulation
GSE117296	AT2G44860	1.05198	0.0491741	systemic 2min regulation
GSE117296	AT4G21880	1.05133	0.00567262	systemic 2min regulation
GSE117296	AT4G23020	1.05043	1.70053e-05	systemic 2min regulation
GSE117296	AT4G30610	1.04816	0.00101408	systemic 4min regulation
GSE117296	AT3G06550	1.04804	0.0330136	systemic 2min regulation
GSE117296	AT1G72440	1.04681	0.000380886	local 2min regulation
GSE117296	AT3G15000	1.04515	0.0238845	systemic 2min regulation
GSE117296	AT3G03770	1.043	0.00735029	systemic 2min regulation
GSE117296	AT3G13860	1.04271	0.0428555	local 2min regulation
GSE117296	AT5G47370	1.04138	0.00199515	systemic 2min regulation
GSE117296	AT4G34050	1.04117	0.00798134	local 2min regulation
GSE117296	AT5G64420	1.04067	0.00736953	systemic 2min regulation
GSE117296	AT3G10940	1.04054	0.0224917	systemic 2min regulation
GSE117296	AT1G74640	1.0404	0.0162302	systemic 2min regulation
GSE117296	AT3G55340	1.03875	0.00918036	systemic 2min regulation
GSE117296	AT4G13710	1.03863	3.15216e-05	local 2min regulation
GSE117296	AT1G51310	1.0375	0.00511685	local 2min regulation
GSE117296	AT1G68840	1.03644	0.0154697	systemic 2min regulation
GSE117296	AT5G25610	1.03549	0.00770547	systemic 2min regulation
GSE117296	AT3G62460	1.03524	0.00229204	systemic 2min regulation
GSE117296	AT5G66750	1.03432	0.00547494	local 2min regulation
GSE117296	AT1G30240	1.0342	0.0190064	systemic 2min regulation
GSE117296	AT5G65860	1.03234	9.23972e-05	systemic 2min regulation
GSE117296	AT5G10920	1.03137	0.0272756	systemic 2min regulation
GSE117296	AT3G55750	1.02829	0.0236266	local 2min regulation
GSE117296	AT5G54980	1.02645	0.0483851	local 2min regulation
GSE117296	AT1G11840	1.02635	2.24793e-06	local 2min regulation
GSE117296	AT3G54470	1.02007	0.0149004	systemic 2min regulation
GSE117296	AT1G15230	1.01987	0.0157291	systemic 2min regulation
GSE117296	AT2G22360	1.01827	0.0328796	local 2min regulation
GSE117296	AT2G20020	1.01822	0.000510734	local 2min regulation
GSE117296	AT3G03770	1.01755	0.000469653	local 2min regulation
GSE117296	AT3G18980	1.01478	0.000695058	local 2min regulation
GSE117296	AT3G04840	1.01464	0.0014721	local 2min regulation
GSE117296	AT4G20840	1.01375	0.00714205	local 2min regulation
GSE117296	AT3G07310	1.0124	0.00402465	local 2min regulation
GSE117296	AT5G48030	1.01211	0.0111643	systemic 2min regulation
GSE117296	AT2G39670	1.01116	0.017292	local 2min regulation
GSE117296	AT4G30840	1.01113	0.00454265	local 2min regulation
GSE117296	AT5G03350	1.01036	0.0211435	systemic 2min regulation
GSE117296	AT3G05030	1.00803	0.000808817	local 2min regulation
GSE117296	AT4G10770	1.00545	0.0312825	local 2min regulation
GSE117296	AT3G11964	1.00382	0.00354262	local 2min regulation
GSE117296	AT3G52520	1.00358	0.0177244	local 4min regulation
GSE117296	AT1G48120	1.00207	0.0492359	systemic 2min regulation
GSE117296	AT3G17390	1.00019	6.16396e-05	local 2min regulation
GSE117296	AT4G36250	1.00004	0.00095595	local 2min regulation
GSE117296	AT1G54385	0.999086	0.0324322	local 8min regulation
GSE117296	AT5G42150	0.996371	0.00369947	systemic 2min regulation
GSE117296	AT4G23540	0.995156	0.00532944	local 2min regulation
GSE117296	AT1G27210	0.994157	0.00161543	local 8min regulation
GSE117296	AT5G66400	0.994003	0.0176275	systemic 8min regulation
GSE117296	AT2G32970	0.991153	2.00602e-05	local 2min regulation
GSE117296	AT1G79550	0.991057	0.0417314	systemic 2min regulation
GSE117296	AT4G02400	0.989412	0.0381457	systemic 2min regulation
GSE117296	AT4G12600	0.988496	0.0174282	systemic 2min regulation
GSE117296	AT2G36470	0.988151	0.017587	systemic 4min regulation
GSE117296	AT1G30520	0.987726	0.0030082	local 2min regulation
GSE117296	AT2G17250	0.985773	0.0366724	local 2min regulation
GSE117296	AT2G29290	0.985721	0.0286353	systemic 2min regulation
GSE117296	AT2G33380	0.985249	0.00266714	local 2min regulation
GSE117296	AT1G07440	0.985197	0.00137792	local 2min regulation
GSE117296	AT1G60590	0.984816	0.0280838	systemic 4min regulation
GSE117296	AT3G05030	0.982881	0.000479862	systemic 2min regulation
GSE117296	AT1G18360	0.980337	0.0454946	systemic 2min regulation
GSE117296	AT1G70580	0.980204	0.0128829	systemic 2min regulation
GSE117296	AT5G18440	0.977041	0.000360971	local 2min regulation
GSE117296	AT5G65900	0.974921	0.000163236	local 2min regulation
GSE117296	AT4G34910	0.97472	0.00789982	local 2min regulation
GSE117296	AT5G20630	0.97236	0.00813658	local 8min regulation
GSE117296	AT1G12090	0.972065	0.0184805	local 8min regulation
GSE117296	AT3G06930	0.972017	0.00647958	local 2min regulation
GSE117296	AT1G64190	0.971098	0.0108052	local 2min regulation
GSE117296	AT3G23620	0.970903	0.0493435	systemic 2min regulation
GSE117296	AT1G70580	0.969982	0.000487059	local 2min regulation
GSE117296	AT1G78930	0.969289	0.000182651	systemic 8min regulation
GSE117296	AT5G01790	0.96836	0.0479339	local 2min regulation
GSE117296	AT1G50840	0.967393	0.010345	local 2min regulation
GSE117296	AT4G31790	0.966823	0.0129354	systemic 2min regulation
GSE117296	AT5G63180	0.9667	0.000786447	systemic 2min regulation
GSE117296	AT3G18980	0.965054	0.00214307	local 8min regulation
GSE117296	AT1G19350	0.964392	0.00234487	local 4min regulation
GSE117296	AT5G18030	0.962717	0.00131986	systemic 2min regulation
GSE117296	AT1G10270	0.961978	0.00823895	systemic 2min regulation
GSE117296	AT3G27060	0.961961	6.55981e-07	systemic 2min regulation
GSE117296	AT4G31790	0.961773	0.0189199	local 2min regulation
GSE117296	AT5G41190	0.960564	0.0494007	local 2min regulation
GSE117296	AT4G20910	0.959837	0.000919126	local 2min regulation
GSE117296	AT1G19350	0.957962	0.0138705	systemic 4min regulation
GSE117296	AT2G31790	0.956373	0.0103833	local 2min regulation
GSE117296	AT5G15090	0.955327	0.00156683	local 2min regulation
GSE117296	AT5G38720	0.955157	0.000842836	systemic 2min regulation
GSE117296	AT3G03250	0.953855	0.0235442	local 2min regulation
GSE117296	AT3G49680	0.953821	0.000100953	local 2min regulation
GSE117296	AT4G14440	0.953659	0.0247167	local 8min regulation
GSE117296	AT5G40610	0.9536	0.0285948	local 2min regulation
GSE117296	AT1G28330	0.953239	0.00296679	local 2min regulation
GSE117296	AT5G26860	0.951945	0.000481551	local 2min regulation
GSE117296	AT4G09900	0.947281	0.0394089	systemic 2min regulation
GSE117296	AT1G74640	0.945513	0.0157801	local 2min regulation
GSE117296	AT2G29540	0.939925	0.00517854	systemic 2min regulation
GSE117296	AT3G49430	0.93875	0.0118591	local 2min regulation
GSE117296	AT3G53460	0.937664	0.00102955	local 2min regulation
GSE117296	AT4G31590	0.934288	0.0102656	systemic 2min regulation
GSE117296	AT5G17010	0.934091	0.00860907	systemic 2min regulation
GSE117296	AT1G80480	0.932843	0.0447552	local 2min regulation
GSE117296	AT5G27350	0.931173	0.0238152	systemic 2min regulation
GSE117296	AT3G11710	0.929514	0.00019576	local 2min regulation
GSE117296	AT5G59850	0.929339	0.000698181	systemic 2min regulation
GSE117296	AT5G22020	0.929142	0.00355341	local 2min regulation
GSE117296	AT3G09820	0.92842	0.00319008	local 2min regulation
GSE117296	AT1G77940	0.92831	0.00471109	local 2min regulation
GSE117296	AT3G17465	0.924383	0.00985224	local 2min regulation
GSE117296	AT5G26742	0.924121	0.000457456	local 2min regulation
GSE117296	AT2G35040	0.922132	0.0314477	local 2min regulation
GSE117296	AT3G11250	0.922121	0.0300392	systemic 2min regulation
GSE117296	AT2G44120	0.921812	0.000813732	local 2min regulation
GSE117296	AT5G64380	0.918973	0.0108494	local 2min regulation
GSE117296	AT4G36220	0.918747	0.00357759	systemic 2min regulation
GSE117296	AT5G25460	0.911552	0.000308705	local 4min regulation
GSE117296	AT3G09440	0.91135	0.0253155	systemic 2min regulation
GSE117296	AT3G18290	0.910813	0.000595055	local 4min regulation
GSE117296	AT2G38760	0.90997	0.000935028	systemic 2min regulation
GSE117296	AT2G31610	0.909909	1.9085e-05	local 2min regulation
GSE117296	AT4G13840	0.908993	0.00706456	systemic 2min regulation
GSE117296	AT2G32640	0.908384	0.00137039	local 2min regulation
GSE117296	AT3G56980	0.907947	0.0147471	local 2min regulation
GSE117296	AT5G13740	0.907562	3.38404e-06	systemic 8min regulation
GSE117296	AT2G31190	0.906585	0.0137658	local 2min regulation
GSE117296	AT3G17390	0.9064	0.0489906	systemic 2min regulation
GSE117296	AT5G53450	0.905814	0.00782173	local 4min regulation
GSE117296	AT3G62750	0.904568	0.000629034	local 2min regulation
GSE117296	AT1G08410	0.903569	0.0020543	systemic 2min regulation
GSE117296	AT3G52140	0.903083	0.00368761	local 2min regulation
GSE117296	AT1G72440	0.902972	0.0245696	systemic 2min regulation
GSE117296	AT2G47610	0.902823	0.00102195	local 2min regulation
GSE117296	AT3G62750	0.90226	0.0082198	systemic 2min regulation
GSE117296	AT1G22770	0.900705	0.000868918	local 2min regulation
GSE117296	AT1G23400	0.900181	0.00290927	local 2min regulation
GSE117296	AT5G02500	0.899641	0.000271566	local 2min regulation
GSE117296	AT3G57490	0.899473	0.000116996	systemic 2min regulation
GSE117296	AT3G59970	0.898362	0.0238277	local 2min regulation
GSE117296	AT3G13940	0.897408	0.00559471	local 2min regulation
GSE117296	AT2G37190	0.896688	0.00139811	local 2min regulation
GSE117296	AT2G26840	0.896208	0.00984024	systemic 2min regulation
GSE117296	AT4G23740	0.895564	0.03656	local 2min regulation
GSE117296	AT1G61580	0.894838	0.00409188	local 2min regulation
GSE117296	AT1G25260	0.89424	0.0352869	systemic 2min regulation
GSE117296	AT1G76620	0.892182	0.0467064	systemic 2min regulation
GSE117296	AT4G35290	0.891861	0.00234724	systemic 2min regulation
GSE117296	AT4G24280	0.890216	0.0051634	local 2min regulation
GSE117296	AT5G60920	0.888544	0.00183223	local 2min regulation
GSE117296	AT1G75280	0.887723	0.000763503	systemic 2min regulation
GSE117296	AT4G34240	0.886187	0.000420045	systemic 2min regulation
GSE117296	AT1G06190	0.885753	0.00619357	local 2min regulation
GSE117296	AT4G02790	0.885141	0.00081785	systemic 2min regulation
GSE117296	AT1G05210	0.884802	0.00449232	local 2min regulation
GSE117296	AT5G53450	0.884283	0.0160853	systemic 4min regulation
GSE117296	AT5G40480	0.880172	0.000107278	systemic 2min regulation
GSE117296	AT5G47210	0.878332	0.0034679	local 2min regulation
GSE117296	AT5G56600	0.878299	7.59581e-06	local 2min regulation
GSE117296	AT1G50840	0.877713	0.00713077	systemic 2min regulation
GSE117296	AT2G18230	0.876612	0.0113649	local 2min regulation
GSE117296	AT1G47500	0.876239	0.0190196	local 2min regulation
GSE117296	AT4G31700	0.876053	0.00399896	systemic 2min regulation
GSE117296	AT2G36630	0.876004	0.00564532	systemic 4min regulation
GSE117296	AT1G74310	0.875548	0.0146646	systemic 4min regulation
GSE117296	AT4G36250	0.874938	0.00732436	systemic 2min regulation
GSE117296	AT1G17690	0.873737	0.0325511	local 2min regulation
GSE117296	AT3G11210	0.873207	0.0158184	systemic 4min regulation
GSE117296	AT1G17880	0.872831	0.00371416	local 2min regulation
GSE117296	AT3G06660	0.872681	0.0493232	local 2min regulation
GSE117296	AT2G22650	0.872498	0.0117617	local 2min regulation
GSE117296	AT5G63180	0.87229	0.00181128	systemic 8min regulation
GSE117296	AT1G31690	0.870847	0.0485419	systemic 2min regulation
GSE117296	AT1G45191	0.869698	0.00352139	systemic 8min regulation
GSE117296	AT1G18540	0.869409	0.0357582	local 2min regulation
GSE117296	AT2G18510	0.868291	0.0442797	local 2min regulation
GSE117296	AT3G44990	0.866462	0.0161471	local 8min regulation
GSE117296	AT2G37640	0.864159	0.0460633	local 8min regulation
GSE117296	AT1G21670	0.863675	0.00585917	local 2min regulation
GSE117296	AT1G23080	0.8632	0.042182	systemic 8min regulation
GSE117296	AT1G41830	0.862291	0.00428435	systemic 2min regulation
GSE117296	AT2G15050	0.861362	0.00149657	systemic 2min regulation
GSE117296	AT4G16370	0.860398	0.000355586	systemic 4min regulation
GSE117296	AT5G15090	0.860355	0.0349409	systemic 2min regulation
GSE117296	AT4G13575	0.860266	0.00281566	local 8min regulation
GSE117296	AT2G29290	0.860246	0.00734128	local 8min regulation
GSE117296	AT3G28220	0.859786	0.029744	local 8min regulation
GSE117296	AT5G39740	0.859558	0.0204124	local 2min regulation
GSE117296	AT2G03440	0.858279	0.0426293	local 2min regulation
GSE117296	AT3G09440	0.857661	0.000615831	local 2min regulation
GSE117296	AT5G02190	0.856924	0.033702	local 4min regulation
GSE117296	AT4G35850	0.85631	3.51726e-05	systemic 2min regulation
GSE117296	AT1G49660	0.85594	0.0224939	systemic 4min regulation
GSE117296	AT1G74850	0.855208	0.0018164	local 2min regulation
GSE117296	AT3G59670	0.853441	0.00158226	local 8min regulation
GSE117296	AT5G60960	0.851105	0.0164135	systemic 2min regulation
GSE117296	AT5G65460	0.848713	0.0178811	local 2min regulation
GSE117296	AT3G02720	0.84767	0.00115418	local 2min regulation
GSE117296	AT1G62390	0.846847	2.87197e-05	local 2min regulation
GSE117296	AT5G67070	0.846273	0.0124846	systemic 2min regulation
GSE117296	AT1G18540	0.846203	0.0353975	systemic 2min regulation
GSE117296	AT4G34240	0.845841	0.00218644	local 2min regulation
GSE117296	AT3G09350	0.845828	0.0431128	systemic 2min regulation
GSE117296	AT1G10522	0.845095	0.0228868	systemic 2min regulation
GSE117296	AT5G17920	0.844954	0.0014578	systemic 2min regulation
GSE117296	AT2G28470	0.844859	0.0240873	local 2min regulation
GSE117296	AT4G00630	0.844071	0.000154278	local 2min regulation
GSE117296	AT5G45950	0.842954	0.0144207	local 8min regulation
GSE117296	AT5G56600	0.839252	0.0169833	systemic 2min regulation
GSE117296	AT1G24490	0.839059	0.000572541	systemic 2min regulation
GSE117296	AT3G47370	0.83855	0.000426383	local 2min regulation
GSE117296	AT1G49760	0.837639	0.0107215	systemic 2min regulation
GSE117296	AT5G20630	0.836949	0.00898467	local 4min regulation
GSE117296	AT1G03630	0.836915	0.00577699	local 2min regulation
GSE117296	AT2G33380	0.836055	0.0226297	systemic 4min regulation
GSE117296	AT3G18110	0.83453	0.0212674	local 2min regulation
GSE117296	AT4G00370	0.83407	0.020725	local 2min regulation
GSE117296	AT4G34200	0.833955	0.0461227	local 2min regulation
GSE117296	AT3G54280	0.83315	0.00155257	systemic 2min regulation
GSE117296	AT4G09760	0.832489	0.00406689	local 2min regulation
GSE117296	AT3G54280	0.831074	0.0367866	local 2min regulation
GSE117296	AT5G38420	0.830581	0.000420137	local 2min regulation
GSE117296	AT3G16840	0.830539	0.0002686	systemic 2min regulation
GSE117296	AT2G36630	0.829856	0.0029107	local 4min regulation
GSE117296	AT4G08870	0.82912	0.000356965	local 2min regulation
GSE117296	AT2G14247	0.826805	0.0149803	systemic 4min regulation
GSE117296	AT1G47500	0.826411	0.00127256	systemic 2min regulation
GSE117296	AT1G23390	0.825819	0.00142551	local 8min regulation
GSE117296	AT2G24590	0.825052	0.00221318	local 2min regulation
GSE117296	AT3G02250	0.822917	0.0371062	systemic 2min regulation
GSE117296	AT4G36220	0.820827	0.00677409	local 2min regulation
GSE117296	AT3G12920	0.820555	0.00291736	local 8min regulation
GSE117296	AT2G43020	0.819888	0.0402457	local 2min regulation
GSE117296	AT1G78680	0.819666	0.0256884	local 2min regulation
GSE117296	AT1G18150	0.81857	0.0421652	systemic 2min regulation
GSE117296	AT5G11200	0.818312	0.0150405	local 2min regulation
GSE117296	AT3G12050	0.817868	0.000374214	local 2min regulation
GSE117296	AT3G23290	0.816789	0.0279262	local 4min regulation
GSE117296	AT4G32720	0.816323	0.0378133	local 2min regulation
GSE117296	AT3G53420	0.814271	0.00762873	local 2min regulation
GSE117296	AT1G53240	0.814116	0.000945286	local 2min regulation
GSE117296	AT2G25140	0.814098	0.0456661	local 2min regulation
GSE117296	AT4G30990	0.813001	0.00496611	local 2min regulation
GSE117296	AT4G35300	0.812586	0.0351191	systemic 2min regulation
GSE117296	AT4G21960	0.812513	0.0287413	local 2min regulation
GSE117296	AT2G33380	0.812108	0.00721699	systemic 8min regulation
GSE117296	AT5G08610	0.811133	0.00861472	systemic 8min regulation
GSE117296	AT3G25520	0.809499	0.00526972	local 2min regulation
GSE117296	AT2G02980	0.806786	0.0463657	local 2min regulation
GSE117296	AT3G50340	0.806629	0.0398392	systemic 8min regulation
GSE117296	AT1G13250	0.806072	0.0283726	systemic 8min regulation
GSE117296	AT4G39470	0.804922	0.00702457	local 2min regulation
GSE117296	AT4G36020	0.804686	0.0295451	systemic 2min regulation
GSE117296	AT4G23000	0.804642	0.0382489	systemic 4min regulation
GSE117296	AT1G44575	0.803727	0.0097126	local 2min regulation
GSE117296	AT5G67240	0.803696	0.0184042	local 2min regulation
GSE117296	AT4G32720	0.803133	0.0173572	systemic 2min regulation
GSE117296	AT1G50920	0.801687	0.000494704	systemic 2min regulation
GSE117296	AT4G24960	0.800404	0.00182635	systemic 4min regulation
GSE117296	AT3G49430	0.80039	0.0267806	systemic 2min regulation
GSE117296	AT3G60750	0.800078	0.00231248	local 2min regulation
GSE117296	AT2G24050	0.798988	0.0401057	local 2min regulation
GSE117296	AT5G06700	0.798679	0.00111693	systemic 2min regulation
GSE117296	AT1G04160	0.798162	0.0212028	systemic 2min regulation
GSE117296	AT5G65480	0.79773	0.00595379	local 2min regulation
GSE117296	AT4G32520	0.797666	0.034586	local 2min regulation
GSE117296	AT3G12670	0.794967	0.000402946	systemic 2min regulation
GSE117296	AT3G46740	0.794669	0.0019109	systemic 2min regulation
GSE117296	AT5G17310	0.794334	0.00959959	local 2min regulation
GSE117296	AT3G22330	0.793743	0.00433841	local 2min regulation
GSE117296	AT1G77470	0.792787	0.00628644	systemic 2min regulation
GSE117296	AT1G25440	0.792392	0.00219024	systemic 2min regulation
GSE117296	AT5G67510	0.790334	0.011723	systemic 2min regulation
GSE117296	AT3G15000	0.789087	0.00646327	local 2min regulation
GSE117296	AT4G18390	0.788767	0.000469737	systemic 2min regulation
GSE117296	AT1G48850	0.787886	0.0137973	systemic 2min regulation
GSE117296	AT1G17750	0.7867	0.036773	systemic 4min regulation
GSE117296	AT2G37640	0.784708	0.0477191	local 2min regulation
GSE117296	AT5G64740	0.784689	0.00473846	local 2min regulation
GSE117296	AT1G19570	0.784502	0.046808	systemic 8min regulation
GSE117296	AT5G49030	0.783059	0.0216528	local 2min regulation
GSE117296	AT3G23530	0.78282	0.0204728	local 2min regulation
GSE117296	AT5G09620	0.782512	7.59149e-06	systemic 2min regulation
GSE117296	AT1G61740	0.782199	0.0231197	systemic 4min regulation
GSE117296	AT3G25410	0.781834	0.0116579	systemic 2min regulation
GSE117296	AT5G05270	0.781538	0.00115331	systemic 4min regulation
GSE117296	AT3G52140	0.780457	0.0010216	systemic 2min regulation
GSE117296	AT2G34620	0.779809	0.00331261	systemic 2min regulation
GSE117296	AT5G45280	0.779295	0.000563016	systemic 2min regulation
GSE117296	AT2G27060	0.776369	0.0150931	systemic 8min regulation
GSE117296	AT5G48760	0.774421	0.0280089	local 2min regulation
GSE117296	AT5G22800	0.773968	0.000992469	local 2min regulation
GSE117296	AT3G51270	0.773701	0.00180664	local 2min regulation
GSE117296	AT3G14395	0.772924	0.00506018	systemic 4min regulation
GSE117296	AT5G15780	0.772475	2.34184e-05	systemic 4min regulation
GSE117296	AT1G23080	0.772392	0.00448483	local 8min regulation
GSE117296	AT4G13170	0.77174	0.00226373	systemic 2min regulation
GSE117296	AT4G18390	0.771271	0.0348505	local 2min regulation
GSE117296	AT3G19000	0.770218	0.0317861	systemic 2min regulation
GSE117296	AT1G71050	0.769705	0.0155286	systemic 2min regulation
GSE117296	AT1G64390	0.769067	0.00681605	local 8min regulation
GSE117296	AT1G43670	0.769026	9.10278e-05	local 2min regulation
GSE117296	AT2G37220	0.767098	0.000819911	local 2min regulation
GSE117296	AT2G36835	0.765441	0.00221921	systemic 2min regulation
GSE117296	AT2G27050	0.765188	0.0357619	systemic 8min regulation
GSE117296	AT2G37170	0.76509	0.0353973	local 2min regulation
GSE117296	AT3G04840	0.764699	0.0119368	systemic 2min regulation
GSE117296	AT1G19990	0.764259	0.0065896	systemic 2min regulation
GSE117296	AT1G65960	0.763578	0.0368606	local 2min regulation
GSE117296	AT2G26330	0.762838	0.0149926	local 2min regulation
GSE117296	AT1G26560	0.76211	0.0206865	local 2min regulation
GSE117296	AT1G72040	0.761653	0.0200854	systemic 8min regulation
GSE117296	AT5G63040	0.760671	0.00132259	local 2min regulation
GSE117296	AT5G13200	0.759727	0.00312793	systemic 2min regulation
GSE117296	AT5G50950	0.759703	0.001138	local 2min regulation
GSE117296	AT4G39510	0.756976	0.0110818	local 8min regulation
GSE117296	AT4G28200	0.756923	0.000717718	local 2min regulation
GSE117296	AT3G58610	0.754364	0.0381755	local 2min regulation
GSE117296	AT4G16370	0.754298	0.00732896	local 4min regulation
GSE117296	AT5G03553	0.753654	0.0111484	local 2min regulation
GSE117296	AT5G44050	0.753553	0.0218347	systemic 8min regulation
GSE117296	AT4G16141	0.753134	0.00582891	local 2min regulation
GSE117296	AT2G34070	0.752296	0.00242569	local 4min regulation
GSE117296	AT5G38430	0.751389	0.0109845	local 2min regulation
GSE117296	AT3G03250	0.750806	0.00851621	systemic 2min regulation
GSE117296	AT3G14350	0.750766	0.00109953	systemic 2min regulation
GSE117296	AT5G20290	0.749973	0.00864228	local 2min regulation
GSE117296	AT5G61020	0.749832	0.00602955	local 2min regulation
GSE117296	AT4G39350	0.748703	0.0213935	local 2min regulation
GSE117296	AT3G49990	0.748073	0.00623258	systemic 2min regulation
GSE117296	AT5G13740	0.746757	0.00810228	local 8min regulation
GSE117296	AT5G63980	0.746742	1.55769e-05	systemic 2min regulation
GSE117296	AT5G10360	0.74619	7.10762e-05	local 2min regulation
GSE117296	AT1G60590	0.746047	0.0227855	local 4min regulation
GSE117296	AT2G37180	0.745948	0.0356493	local 4min regulation
GSE117296	AT5G36910	0.744661	0.0220066	systemic 8min regulation
GSE117296	AT1G63680	0.744148	0.00840459	local 2min regulation
GSE117296	AT5G63980	0.741771	0.039243	local 2min regulation
GSE117296	AT1G23740	0.74145	0.0197387	local 2min regulation
GSE117296	AT1G20950	0.741244	0.0196199	systemic 2min regulation
GSE117296	AT1G61580	0.740241	0.0361494	systemic 2min regulation
GSE117296	AT1G50450	0.739615	0.0010157	local 2min regulation
GSE117296	AT4G31590	0.739117	0.0327277	systemic 8min regulation
GSE117296	AT2G18890	0.738357	0.00141649	local 8min regulation
GSE117296	AT4G13575	0.737867	0.0135881	local 2min regulation
GSE117296	AT3G08590	0.735934	0.000691962	systemic 2min regulation
GSE117296	AT4G28320	0.735821	0.00207243	systemic 2min regulation
GSE117296	AT2G30390	0.735325	0.00996663	local 2min regulation
GSE117296	AT3G56360	0.734379	0.0142018	local 2min regulation
GSE117296	AT3G14350	0.733416	4.03979e-05	local 2min regulation
GSE117296	AT2G21790	0.732651	0.0376421	local 2min regulation
GSE117296	AT2G28470	0.73215	0.0273617	systemic 2min regulation
GSE117296	AT5G56090	0.731206	0.0272214	local 2min regulation
GSE117296	AT5G20885	0.729933	0.0331447	local 4min regulation
GSE117296	AT2G21580	0.728486	0.00717121	systemic 2min regulation
GSE117296	AT3G04650	0.727339	0.0289443	local 2min regulation
GSE117296	AT1G33410	0.726838	0.00511849	systemic 2min regulation
GSE117296	AT5G14770	0.72647	0.0164945	systemic 2min regulation
GSE117296	AT3G24420	0.726283	0.0215505	systemic 2min regulation
GSE117296	AT1G48300	0.724697	2.04733e-06	systemic 2min regulation
GSE117296	AT5G65460	0.72422	0.000578656	systemic 2min regulation
GSE117296	AT3G56150	0.723824	0.00271069	local 2min regulation
GSE117296	AT5G60390	0.722492	0.0463174	local 2min regulation
GSE117296	AT3G24503	0.72224	0.00582737	systemic 2min regulation
GSE117296	AT5G05860	0.722142	0.00419694	local 2min regulation
GSE117296	AT3G24420	0.721996	0.0148445	local 2min regulation
GSE117296	AT4G36130	0.721281	0.0303764	systemic 2min regulation
GSE117296	AT3G18290	0.721236	0.0245049	systemic 8min regulation
GSE117296	AT3G02720	0.720856	0.000183073	systemic 2min regulation
GSE117296	AT1G66580	0.720673	0.0133989	systemic 2min regulation
GSE117296	AT3G56120	0.71931	0.00205857	local 2min regulation
GSE117296	AT1G26880	0.717029	0.0204369	systemic 2min regulation
GSE117296	AT2G47110	0.716411	0.0292087	local 2min regulation
GSE117296	AT3G27850	0.716121	0.00900258	local 2min regulation
GSE117296	AT4G11100	0.715585	0.000305976	local 2min regulation
GSE117296	AT2G24990	0.715064	0.00777234	local 2min regulation
GSE117296	AT2G45030	0.714866	0.00175812	systemic 2min regulation
GSE117296	AT2G40840	0.71449	0.0253608	local 2min regulation
GSE117296	AT1G77670	0.71418	0.00133245	systemic 2min regulation
GSE117296	AT5G14740	0.713006	0.0319336	local 2min regulation
GSE117296	AT3G19450	0.712437	0.00287089	local 2min regulation
GSE117296	AT1G32380	0.712078	0.0438723	local 2min regulation
GSE117296	AT3G22890	0.711916	0.0450086	systemic 2min regulation
GSE117296	AT1G04530	0.711765	0.00367651	local 2min regulation
GSE117296	AT3G09200	0.71012	3.49557e-06	local 2min regulation
GSE117296	AT5G03850	0.709596	0.0187132	systemic 2min regulation
GSE117296	AT2G42540	0.708057	0.039754	local 8min regulation
GSE117296	AT5G60920	0.706188	0.0133343	systemic 2min regulation
GSE117296	AT1G73230	0.705964	0.000151404	local 2min regulation
GSE117296	AT1G52930	0.70463	0.0113081	local 8min regulation
GSE117296	AT1G54040	0.702588	0.00386119	systemic 2min regulation
GSE117296	AT4G17340	0.702382	0.018231	systemic 8min regulation
GSE117296	AT5G25980	0.702055	0.0219654	local 8min regulation
GSE117296	AT3G11120	0.700774	0.0434968	systemic 2min regulation
GSE117296	AT4G18240	0.698681	0.0134569	local 2min regulation
GSE117296	AT4G19410	0.69655	0.00192004	local 4min regulation
GSE117296	AT4G37980	0.695902	0.0153724	local 2min regulation
GSE117296	AT2G20750	0.694093	0.0121387	local 8min regulation
GSE117296	AT3G61110	0.693701	0.00490553	systemic 2min regulation
GSE117296	AT1G64780	0.693483	0.00376927	local 2min regulation
GSE117296	AT4G02715	0.692997	0.00430371	local 8min regulation
GSE117296	AT3G44150	0.692514	0.000855387	local 2min regulation
GSE117296	AT3G47370	0.69178	0.00195925	systemic 2min regulation
GSE117296	AT3G57810	0.688869	0.0248915	systemic 2min regulation
GSE117296	AT1G19000	0.688721	0.0421232	local 2min regulation
GSE117296	AT3G08947	0.688225	0.0356609	systemic 2min regulation
GSE117296	AT3G27250	0.687981	0.0115972	systemic 8min regulation
GSE117296	AT5G63780	0.686999	0.00464099	systemic 2min regulation
GSE117296	AT4G01026	0.685657	0.0233129	local 2min regulation
GSE117296	AT1G31817	0.684766	0.0308122	local 2min regulation
GSE117296	AT4G14620	0.684461	0.0404093	local 2min regulation
GSE117296	AT2G34070	0.684273	0.00492808	systemic 4min regulation
GSE117296	AT4G30930	0.683941	0.0277549	local 2min regulation
GSE117296	AT5G05250	0.68362	0.0155895	local 4min regulation
GSE117296	AT5G06360	0.683543	0.00107328	local 2min regulation
GSE117296	AT3G57190	0.682766	0.0258318	local 2min regulation
GSE117296	AT3G06350	0.682338	0.000590607	local 2min regulation
GSE117296	AT2G34660	0.682063	0.014535	local 2min regulation
GSE117296	AT2G36830	0.682046	0.000375961	local 4min regulation
GSE117296	AT4G24280	0.681692	0.0177865	systemic 2min regulation
GSE117296	AT5G25610	0.681647	0.00425335	systemic 8min regulation
GSE117296	AT1G55370	0.681551	0.00759954	local 2min regulation
GSE117296	AT3G56150	0.680949	0.00394792	systemic 2min regulation
GSE117296	AT1G30360	0.679547	6.51788e-05	local 2min regulation
GSE117296	AT1G56050	0.679456	0.00239661	systemic 2min regulation
GSE117296	AT2G36590	0.678973	0.01465	systemic 2min regulation
GSE117296	AT3G01810	0.678887	0.00519282	local 2min regulation
GSE117296	AT3G07110	0.677949	0.0182498	local 2min regulation
GSE117296	AT1G12860	0.677899	0.0412595	local 2min regulation
GSE117296	AT1G53240	0.676921	0.0051615	systemic 2min regulation
GSE117296	AT3G52290	0.676664	0.00267838	local 2min regulation
GSE117296	AT3G62310	0.67633	0.00545866	local 2min regulation
GSE117296	AT1G01060	0.675897	0.000972374	systemic 4min regulation
GSE117296	AT5G26742	0.675673	0.0473026	systemic 2min regulation
GSE117296	AT3G62700	0.675138	0.00467813	local 2min regulation
GSE117296	AT1G29670	0.674505	1.61388e-05	systemic 2min regulation
GSE117296	AT4G21990	0.674326	0.0171248	local 2min regulation
GSE117296	AT2G47840	0.671817	0.0473959	local 8min regulation
GSE117296	AT1G48650	0.671229	0.000227867	local 2min regulation
GSE117296	AT5G08610	0.670166	0.0496238	local 8min regulation
GSE117296	AT1G01970	0.669248	0.0494733	local 2min regulation
GSE117296	AT2G24120	0.668932	0.0174775	local 8min regulation
GSE117296	AT2G24150	0.668774	0.00411017	local 2min regulation
GSE117296	AT5G60020	0.668653	0.00223984	local 4min regulation
GSE117296	AT5G61020	0.668224	0.0385883	systemic 2min regulation
GSE117296	AT3G50685	0.667502	0.0170317	local 2min regulation
GSE117296	AT4G36390	0.667302	0.00116009	local 2min regulation
GSE117296	AT1G15230	0.666898	0.0382606	local 2min regulation
GSE117296	AT1G43170	0.666792	0.0022521	systemic 2min regulation
GSE117296	AT4G37000	0.666651	0.000170762	local 2min regulation
GSE117296	AT4G14440	0.664166	0.031902	systemic 8min regulation
GSE117296	AT3G16770	0.664115	0.0307082	systemic 8min regulation
GSE117296	AT1G47210	0.663736	0.0365008	local 8min regulation
GSE117296	AT4G33520	0.663723	0.000724295	local 2min regulation
GSE117296	AT5G06350	0.662621	0.00418606	local 2min regulation
GSE117296	AT1G10760	0.662152	0.047511	systemic 2min regulation
GSE117296	AT1G78450	0.661152	0.0278763	local 8min regulation
GSE117296	AT5G25780	0.661067	0.000442228	local 2min regulation
GSE117296	AT2G33380	0.661053	0.0108974	local 8min regulation
GSE117296	AT1G09830	0.661017	0.00292996	local 2min regulation
GSE117296	AT2G38540	0.660756	0.0363992	systemic 8min regulation
GSE117296	AT5G43150	0.659959	0.00890494	systemic 2min regulation
GSE117296	AT5G06360	0.659871	0.014992	systemic 2min regulation
GSE117296	AT1G09590	0.658748	0.0319963	systemic 2min regulation
GSE117296	AT3G18600	0.658223	0.000177359	local 8min regulation
GSE117296	AT1G64490	0.655522	0.0253929	local 4min regulation
GSE117296	AT1G72040	0.655189	0.00560897	local 8min regulation
GSE117296	AT2G26840	0.654032	0.0236283	systemic 8min regulation
GSE117296	AT5G55920	0.650109	0.0322218	local 8min regulation
GSE117296	AT5G62350	0.648028	0.0267379	systemic 8min regulation
GSE117296	AT5G35495	0.647128	0.000539247	systemic 4min regulation
GSE117296	AT2G44120	0.646959	0.0477616	systemic 2min regulation
GSE117296	AT2G04030	0.64593	0.0325463	systemic 8min regulation
GSE117296	AT5G05250	0.644609	0.0291647	systemic 4min regulation
GSE117296	AT2G25530	0.64254	0.0323712	local 4min regulation
GSE117296	AT2G32560	0.642382	0.00278018	local 2min regulation
GSE117296	AT5G52040	0.642251	0.0359155	systemic 2min regulation
GSE117296	AT5G28770	0.64208	0.0258497	local 8min regulation
GSE117296	AT5G24850	0.641371	0.000952692	systemic 4min regulation
GSE117296	AT4G29060	0.640892	0.0153464	local 2min regulation
GSE117296	AT1G71695	0.639597	0.000337399	systemic 8min regulation
GSE117296	AT1G54270	0.639582	0.0470243	systemic 2min regulation
GSE117296	AT1G29880	0.638598	2.58205e-06	systemic 2min regulation
GSE117296	AT2G31530	0.636919	0.00108424	systemic 2min regulation
GSE117296	AT3G06530	0.636279	0.0343801	local 8min regulation
GSE117296	AT1G51140	0.636211	0.00465942	systemic 8min regulation
GSE117296	AT5G59480	0.635711	0.00185572	systemic 4min regulation
GSE117296	AT4G09040	0.635533	0.0132309	local 2min regulation
GSE117296	AT1G78850	0.63431	0.042742	local 4min regulation
GSE117296	AT5G62270	0.6341	0.0454143	local 8min regulation
GSE117296	AT3G19830	0.633814	0.00342208	systemic 2min regulation
GSE117296	AT1G72500	0.632856	2.91583e-05	systemic 2min regulation
GSE117296	AT3G52290	0.632687	0.0103199	local 8min regulation
GSE117296	AT3G62310	0.631818	0.0210594	systemic 2min regulation
GSE117296	AT2G36630	0.631749	0.000188905	systemic 8min regulation
GSE117296	AT3G57150	0.630425	0.0408365	local 8min regulation
GSE117296	AT4G31930	0.629532	0.0350999	local 2min regulation
GSE117296	AT2G45560	0.627745	0.0487026	systemic 8min regulation
GSE117296	AT3G52370	0.627415	0.01438	systemic 8min regulation
GSE117296	AT1G55360	0.626662	0.0323071	systemic 4min regulation
GSE117296	AT3G03960	0.626224	0.00572243	systemic 2min regulation
GSE117296	AT5G55510	0.626014	0.0010846	local 2min regulation
GSE117296	AT2G35130	0.625034	0.0203774	local 2min regulation
GSE117296	AT4G37800	0.624813	0.0126587	systemic 8min regulation
GSE117296	AT1G60710	0.62458	0.00247695	local 2min regulation
GSE117296	AT5G67330	0.62392	9.90207e-06	local 4min regulation
GSE117296	AT1G80920	0.623595	0.0228452	systemic 2min regulation
GSE117296	AT3G06350	0.622305	0.0016183	systemic 2min regulation
GSE117296	AT2G37040	0.621253	0.000995129	systemic 4min regulation
GSE117296	AT1G19150	0.619996	0.00517859	local 2min regulation
GSE117296	AT1G78820	0.619764	0.0183362	local 8min regulation
GSE117296	AT3G60245	0.619084	0.0217238	systemic 2min regulation
GSE117296	AT1G61740	0.618778	0.0302871	local 4min regulation
GSE117296	AT5G40380	0.61867	0.00116366	systemic 2min regulation
GSE117296	AT5G11790	0.618454	0.000294703	local 8min regulation
GSE117296	AT1G60600	0.617476	0.00160664	local 2min regulation
GSE117296	AT1G76280	0.617341	0.0292466	systemic 2min regulation
GSE117296	AT1G01080	0.617132	0.0158395	local 2min regulation
GSE117296	AT1G73710	0.617059	0.0308841	local 2min regulation
GSE117296	AT1G70310	0.616708	0.0124619	local 2min regulation
GSE117296	AT3G13570	0.616303	0.00243149	local 2min regulation
GSE117296	AT2G35040	0.616128	0.00475293	systemic 2min regulation
GSE117296	AT3G03600	0.615851	0.0130707	systemic 2min regulation
GSE117296	AT1G19050	0.615177	0.0437999	systemic 4min regulation
GSE117296	AT3G60880	0.615069	0.0401597	systemic 2min regulation
GSE117296	AT1G62740	0.614038	0.0391158	local 2min regulation
GSE117296	AT5G44190	0.613014	0.0051047	local 2min regulation
GSE117296	AT5G15450	0.612879	0.00553099	local 2min regulation
GSE117296	AT3G44750	0.611377	0.0396902	systemic 8min regulation
GSE117296	AT2G31040	0.611189	0.00989313	local 2min regulation
GSE117296	AT1G74560	0.61068	0.0139474	systemic 8min regulation
GSE117296	AT2G28000	0.609674	0.0223832	systemic 8min regulation
GSE117296	AT4G22010	0.607452	0.00223761	local 8min regulation
GSE117296	AT1G36160	0.607106	0.0250039	local 2min regulation
GSE117296	AT1G29670	0.607039	1.77739e-06	systemic 8min regulation
GSE117296	AT1G63000	0.607	0.00270246	systemic 2min regulation
GSE117296	AT5G59540	0.606866	0.00142406	systemic 2min regulation
GSE117296	AT1G15440	0.606715	0.00784849	local 8min regulation
GSE117296	AT2G29690	0.605868	7.58849e-05	local 2min regulation
GSE117296	AT2G29080	0.604898	0.0265576	local 2min regulation
GSE117296	AT2G42750	0.604863	0.00903419	systemic 4min regulation
GSE117296	AT1G72440	0.604697	0.0309259	local 8min regulation
GSE117296	AT4G15550	0.604241	0.00440019	systemic 4min regulation
GSE117296	AT4G36360	0.602643	1.97257e-05	systemic 8min regulation
GSE117296	AT3G48610	0.602608	0.0194483	systemic 4min regulation
GSE117296	AT1G56110	0.602506	0.0193713	local 8min regulation
GSE117296	AT2G40290	0.602359	0.0208574	local 2min regulation
GSE117296	AT1G59990	0.599999	0.0347976	local 8min regulation
GSE117296	AT5G15950	0.599439	0.00436408	local 4min regulation
GSE117296	AT1G18800	0.599247	0.0414718	systemic 8min regulation
GSE117296	AT3G23810	0.597216	0.00940172	systemic 8min regulation
GSE117296	AT3G18190	0.596567	0.00270192	local 2min regulation
GSE117296	AT2G16850	0.59596	0.0107765	local 4min regulation
GSE117296	AT4G11420	0.594529	0.00587246	local 2min regulation
GSE117296	AT3G62250	0.594525	0.0151016	systemic 2min regulation
GSE117296	AT5G27360	0.593008	0.00943443	systemic 4min regulation
GSE117296	AT1G78060	0.592859	0.0143576	systemic 2min regulation
GSE117296	AT5G10690	0.59168	0.00456801	local 2min regulation
GSE117296	AT4G22010	0.591029	0.0297175	local 4min regulation
GSE117296	AT5G65683	0.589203	3.57979e-05	local 4min regulation
GSE117296	AT4G36420	0.587965	0.0299861	systemic 2min regulation
GSE117296	AT5G41600	0.587917	0.00101307	systemic 2min regulation
GSE117296	AT1G48860	0.587749	0.0481713	systemic 2min regulation
GSE117296	AT1G16080	0.585663	0.000519264	systemic 2min regulation
GSE117296	AT1G30250	0.585409	0.00221176	local 8min regulation
GSE117296	AT1G02780	0.585126	0.001408	local 2min regulation
GSE117296	AT5G01850	-0.585148	0.0361453	systemic 8min regulation
GSE117296	AT1G31540	-0.585212	0.0413111	systemic 4min regulation
GSE117296	AT1G76490	-0.586181	0.0335211	local 2min regulation
GSE117296	AT3G23030	-0.586974	0.00534839	local 2min regulation
GSE117296	AT1G08460	-0.587	0.0320376	local 4min regulation
GSE117296	AT2G39050	-0.588611	0.0214018	local 4min regulation
GSE117296	AT3G09440	-0.588794	0.0125081	local 8min regulation
GSE117296	AT1G21130	-0.588839	0.0268863	local 2min regulation
GSE117296	AT3G58490	-0.588879	0.0333917	systemic 2min regulation
GSE117296	AT1G03400	-0.590367	0.0214434	systemic 8min regulation
GSE117296	AT1G53920	-0.591492	0.0143779	systemic 4min regulation
GSE117296	AT1G56510	-0.592823	0.008627	local 8min regulation
GSE117296	AT4G16950	-0.593629	2.44707e-05	local 4min regulation
GSE117296	AT5G60980	-0.593685	0.00233164	local 2min regulation
GSE117296	AT4G17900	-0.593724	0.0189283	systemic 4min regulation
GSE117296	AT3G07780	-0.593755	0.00302472	local 8min regulation
GSE117296	AT1G32700	-0.593894	0.0397759	local 2min regulation
GSE117296	AT5G45500	-0.595177	0.0249318	systemic 4min regulation
GSE117296	AT4G08930	-0.59534	0.0390301	systemic 8min regulation
GSE117296	AT2G22240	-0.595687	0.0454938	local 8min regulation
GSE117296	AT3G44630	-0.595737	5.70606e-08	local 2min regulation
GSE117296	AT3G10010	-0.596263	0.0304306	systemic 8min regulation
GSE117296	AT5G11650	-0.596943	0.0241687	systemic 8min regulation
GSE117296	AT4G00330	-0.59893	0.00246797	systemic 8min regulation
GSE117296	AT5G02290	-0.59979	0.00589761	systemic 4min regulation
GSE117296	AT4G32850	-0.600113	0.0172742	systemic 2min regulation
GSE117296	AT1G30810	-0.600849	0.0418873	local 2min regulation
GSE117296	AT5G10740	-0.600934	0.0409796	systemic 2min regulation
GSE117296	AT5G27100	-0.601427	0.031742	local 2min regulation
GSE117296	AT4G35780	-0.602095	0.0397326	local 2min regulation
GSE117296	AT4G32340	-0.602713	0.0124541	systemic 4min regulation
GSE117296	AT3G46970	-0.603102	0.0254253	systemic 4min regulation
GSE117296	AT4G33920	-0.603572	0.0245256	systemic 2min regulation
GSE117296	AT1G21900	-0.604078	0.0423239	systemic 8min regulation
GSE117296	AT5G39590	-0.604403	0.0459858	systemic 2min regulation
GSE117296	AT1G09070	-0.604464	7.84957e-06	local 4min regulation
GSE117296	AT5G25280	-0.604634	0.0224121	local 8min regulation
GSE117296	AT1G63690	-0.60478	0.0320603	local 2min regulation
GSE117296	AT3G63500	-0.605194	0.0185062	systemic 2min regulation
GSE117296	AT5G01600	-0.607721	0.0191073	systemic 2min regulation
GSE117296	AT1G71030	-0.607785	0.0112711	systemic 4min regulation
GSE117296	AT3G13790	-0.60809	0.0282559	systemic 8min regulation
GSE117296	AT3G57530	-0.61073	0.00187646	systemic 2min regulation
GSE117296	AT3G55240	-0.611283	0.00133829	local 4min regulation
GSE117296	AT3G09470	-0.617157	0.0343744	local 2min regulation
GSE117296	AT3G23410	-0.617789	0.00066528	local 2min regulation
GSE117296	AT3G10770	-0.6199	0.00726818	local 2min regulation
GSE117296	AT4G02050	-0.619951	0.00687939	local 2min regulation
GSE117296	AT3G50950	-0.621139	0.0209968	systemic 4min regulation
GSE117296	AT2G42780	-0.621208	4.9142e-05	local 2min regulation
GSE117296	AT2G15620	-0.622018	0.00865053	local 4min regulation
GSE117296	AT4G13350	-0.624475	0.00828533	local 2min regulation
GSE117296	AT4G38800	-0.627257	0.00758801	systemic 2min regulation
GSE117296	AT4G10770	-0.628467	0.00576268	local 4min regulation
GSE117296	AT4G00300	-0.629035	0.0465217	systemic 2min regulation
GSE117296	AT3G23410	-0.630512	0.00059782	local 8min regulation
GSE117296	AT5G65010	-0.631457	0.0290574	systemic 2min regulation
GSE117296	AT3G21630	-0.632063	3.40693e-05	local 2min regulation
GSE117296	AT1G05870	-0.632532	0.00145416	local 8min regulation
GSE117296	AT1G65820	-0.633478	0.0109103	systemic 8min regulation
GSE117296	AT5G59920	-0.634493	0.00142332	local 2min regulation
GSE117296	AT2G28720	-0.634954	0.0187171	systemic 4min regulation
GSE117296	AT5G13200	-0.635535	0.012112	systemic 8min regulation
GSE117296	AT5G35460	-0.636073	0.00267726	local 8min regulation
GSE117296	AT3G07760	-0.637734	0.00242282	systemic 2min regulation
GSE117296	AT1G11350	-0.637964	0.0259012	local 2min regulation
GSE117296	AT4G25940	-0.63813	0.0239241	systemic 4min regulation
GSE117296	AT2G15020	-0.638499	0.0108996	local 2min regulation
GSE117296	AT5G63160	-0.639021	0.0114242	local 8min regulation
GSE117296	AT4G00150	-0.639176	0.0168589	local 2min regulation
GSE117296	AT5G58510	-0.640417	0.0131133	local 2min regulation
GSE117296	AT3G56030	-0.640803	0.0081649	systemic 4min regulation
GSE117296	AT5G28300	-0.641158	0.000926579	local 2min regulation
GSE117296	AT2G16380	-0.641883	0.0366284	local 2min regulation
GSE117296	AT1G37130	-0.642706	0.00121211	local 2min regulation
GSE117296	AT3G22290	-0.643629	0.00338775	local 2min regulation
GSE117296	AT1G70530	-0.644399	0.021685	systemic 4min regulation
GSE117296	AT4G16990	-0.644727	0.0140184	systemic 2min regulation
GSE117296	AT4G17230	-0.6453	0.0274075	local 4min regulation
GSE117296	AT5G02270	-0.645313	0.0101456	local 8min regulation
GSE117296	AT1G09570	-0.645549	0.00328136	systemic 8min regulation
GSE117296	AT3G57410	-0.645608	0.000504285	systemic 2min regulation
GSE117296	AT5G47910	-0.646114	1.03037e-06	local 8min regulation
GSE117296	AT5G19330	-0.649972	0.000774341	systemic 2min regulation
GSE117296	AT3G10985	-0.650452	0.0252446	local 8min regulation
GSE117296	AT5G13200	-0.65079	0.00189615	local 8min regulation
GSE117296	AT3G13310	-0.651553	0.0137421	systemic 4min regulation
GSE117296	AT2G25900	-0.654048	1.02946e-05	systemic 4min regulation
GSE117296	AT1G11310	-0.654933	0.00118375	systemic 8min regulation
GSE117296	AT4G19420	-0.655288	3.81957e-06	systemic 4min regulation
GSE117296	AT1G53390	-0.656106	0.0144787	local 2min regulation
GSE117296	AT4G11900	-0.65623	0.0397784	systemic 4min regulation
GSE117296	AT1G65800	-0.656746	0.0346947	systemic 4min regulation
GSE117296	AT3G57410	-0.658293	0.000105329	local 2min regulation
GSE117296	AT5G11090	-0.660842	0.000287813	local 2min regulation
GSE117296	AT5G60980	-0.663968	0.000397616	systemic 2min regulation
GSE117296	AT3G06290	-0.666417	0.0115017	systemic 2min regulation
GSE117296	AT2G29670	-0.668077	0.021959	systemic 4min regulation
GSE117296	AT5G56240	-0.669444	0.000188127	local 2min regulation
GSE117296	AT2G16600	-0.670327	0.01357	systemic 4min regulation
GSE117296	AT1G29310	-0.670471	0.0020454	systemic 8min regulation
GSE117296	AT1G72890	-0.671376	0.00507209	local 4min regulation
GSE117296	AT4G34480	-0.671394	8.24186e-05	systemic 8min regulation
GSE117296	AT4G35230	-0.672053	0.00154713	local 2min regulation
GSE117296	AT1G23390	-0.673483	0.0191176	systemic 4min regulation
GSE117296	AT4G01120	-0.674707	0.0422165	local 2min regulation
GSE117296	AT2G40230	-0.675383	0.000792578	systemic 2min regulation
GSE117296	AT3G02380	-0.676118	0.0160982	systemic 2min regulation
GSE117296	AT4G18700	-0.6772	0.0450463	local 8min regulation
GSE117296	AT1G71220	-0.679825	0.000169524	systemic 8min regulation
GSE117296	AT4G30910	-0.680456	0.00725416	systemic 2min regulation
GSE117296	AT5G25280	-0.680654	0.0325619	local 4min regulation
GSE117296	AT1G65930	-0.681146	8.67358e-05	systemic 2min regulation
GSE117296	AT1G05890	-0.682414	0.0206109	local 2min regulation
GSE117296	AT3G07780	-0.682725	0.0318832	local 2min regulation
GSE117296	AT4G24690	-0.68439	0.0015276	systemic 8min regulation
GSE117296	AT1G49730	-0.684483	0.0246252	systemic 2min regulation
GSE117296	AT4G15540	-0.685405	0.00929635	systemic 8min regulation
GSE117296	AT5G51740	-0.685473	0.000938173	local 8min regulation
GSE117296	AT3G63310	-0.685708	0.00178976	local 8min regulation
GSE117296	AT3G52190	-0.686839	0.0242318	local 8min regulation
GSE117296	AT1G75400	-0.687145	0.0118959	local 2min regulation
GSE117296	AT2G40300	-0.688391	0.0187795	systemic 2min regulation
GSE117296	AT4G17140	-0.688538	0.0202159	local 2min regulation
GSE117296	AT2G30620	-0.688584	0.000525753	systemic 2min regulation
GSE117296	AT4G24570	-0.689127	0.0223165	local 2min regulation
GSE117296	AT1G31350	-0.689482	0.0176801	systemic 2min regulation
GSE117296	AT1G31540	-0.690066	0.0069492	local 8min regulation
GSE117296	AT5G47435	-0.691331	0.00038219	systemic 2min regulation
GSE117296	AT5G28540	-0.691888	0.0279392	systemic 4min regulation
GSE117296	AT1G63860	-0.69342	0.0147493	systemic 2min regulation
GSE117296	AT2G25530	-0.696127	0.000235604	local 2min regulation
GSE117296	AT1G49050	-0.696181	0.00190294	systemic 2min regulation
GSE117296	AT4G16210	-0.697732	0.0431073	local 2min regulation
GSE117296	AT2G26600	-0.698066	0.0372159	systemic 8min regulation
GSE117296	AT1G10020	-0.698132	0.0278975	local 2min regulation
GSE117296	AT2G16600	-0.698664	0.00617837	systemic 8min regulation
GSE117296	AT4G23200	-0.699158	0.023478	local 4min regulation
GSE117296	AT4G11600	-0.700398	0.0262865	local 8min regulation
GSE117296	AT3G60600	-0.70124	0.0066171	local 2min regulation
GSE117296	AT5G44530	-0.701708	0.00915287	local 2min regulation
GSE117296	AT2G33360	-0.702836	0.00149702	local 2min regulation
GSE117296	AT5G54130	-0.704517	4.57044e-06	systemic 8min regulation
GSE117296	AT4G08930	-0.704921	0.00081068	systemic 2min regulation
GSE117296	AT1G31130	-0.705132	0.0251297	systemic 8min regulation
GSE117296	AT5G11650	-0.706421	0.00250664	local 8min regulation
GSE117296	AT4G13340	-0.707877	0.00533219	systemic 8min regulation
GSE117296	AT1G74600	-0.709623	0.0069223	systemic 4min regulation
GSE117296	AT4G35600	-0.710819	0.00334476	systemic 2min regulation
GSE117296	AT2G34070	-0.711226	0.00830449	local 2min regulation
GSE117296	AT3G44670	-0.711601	3.7061e-05	local 2min regulation
GSE117296	AT5G13710	-0.712677	0.0386496	local 2min regulation
GSE117296	AT5G24210	-0.713554	0.0469929	local 8min regulation
GSE117296	AT1G73870	-0.71391	0.0107344	local 2min regulation
GSE117296	AT1G09430	-0.713969	0.0209078	local 2min regulation
GSE117296	AT5G63030	-0.715789	0.0329475	local 2min regulation
GSE117296	AT1G75380	-0.716174	0.00230972	systemic 8min regulation
GSE117296	AT2G26440	-0.716663	0.0474346	local 4min regulation
GSE117296	AT4G22820	-0.719325	0.00350552	local 2min regulation
GSE117296	AT5G64410	-0.72023	0.0484779	systemic 8min regulation
GSE117296	AT3G14150	-0.720788	0.0153444	systemic 2min regulation
GSE117296	AT1G59700	-0.720943	0.00126623	local 2min regulation
GSE117296	AT2G11225	-0.721497	0.00522568	systemic 2min regulation
GSE117296	AT1G07897	-0.723327	0.00218212	local 4min regulation
GSE117296	AT5G10860	-0.723972	0.00378306	systemic 2min regulation
GSE117296	AT3G05270	-0.724167	0.0201187	local 2min regulation
GSE117296	AT3G29240	-0.724184	0.000150455	systemic 2min regulation
GSE117296	AT5G23670	-0.726547	0.0157405	local 2min regulation
GSE117296	AT2G40600	-0.727808	0.0475272	local 2min regulation
GSE117296	AT2G26210	-0.72802	0.0141319	local 2min regulation
GSE117296	AT2G37760	-0.728424	0.0251461	systemic 4min regulation
GSE117296	AT3G46970	-0.728803	0.0104537	local 4min regulation
GSE117296	AT2G40520	-0.729666	0.00514822	systemic 8min regulation
GSE117296	AT1G25550	-0.730034	0.000459762	local 8min regulation
GSE117296	AT1G29300	-0.730313	0.0389388	systemic 2min regulation
GSE117296	AT3G01520	-0.730397	0.00304579	local 2min regulation
GSE117296	AT2G42790	-0.730712	0.0378882	systemic 8min regulation
GSE117296	AT5G11090	-0.731394	8.39852e-05	local 8min regulation
GSE117296	AT4G09570	-0.731577	0.0410041	systemic 8min regulation
GSE117296	AT2G15020	-0.731625	0.00118083	local 8min regulation
GSE117296	AT5G50950	-0.73179	0.0122729	systemic 4min regulation
GSE117296	AT3G61890	-0.731865	0.045556	systemic 2min regulation
GSE117296	AT3G02380	-0.73217	9.72977e-06	local 2min regulation
GSE117296	AT4G21990	-0.733325	0.0121621	systemic 4min regulation
GSE117296	AT3G50000	-0.734216	1.0401e-06	local 2min regulation
GSE117296	AT1G53780	-0.734418	0.0452773	systemic 2min regulation
GSE117296	AT1G32700	-0.734865	0.0388785	systemic 8min regulation
GSE117296	AT5G19250	-0.734886	0.00393374	systemic 8min regulation
GSE117296	AT1G63880	-0.735303	0.000707713	systemic 4min regulation
GSE117296	AT4G36580	-0.737004	0.0445076	systemic 8min regulation
GSE117296	AT1G63690	-0.737184	5.33224e-07	systemic 2min regulation
GSE117296	AT2G42790	-0.737923	0.00508398	systemic 2min regulation
GSE117296	AT5G22060	-0.738232	0.000716144	local 8min regulation
GSE117296	AT5G17050	-0.739017	0.013265	local 8min regulation
GSE117296	AT1G70820	-0.740175	0.0139544	systemic 4min regulation
GSE117296	AT1G33720	-0.741466	0.0444504	local 8min regulation
GSE117296	AT3G01490	-0.741619	0.0364056	local 2min regulation
GSE117296	AT3G55240	-0.743568	0.0140282	local 2min regulation
GSE117296	AT4G25900	-0.74376	0.0305313	systemic 8min regulation
GSE117296	AT5G45490	-0.744185	0.0141809	systemic 2min regulation
GSE117296	AT4G25690	-0.745416	0.0306351	local 2min regulation
GSE117296	AT1G23030	-0.745684	0.0419799	systemic 8min regulation
GSE117296	AT3G54620	-0.746045	0.0146212	local 2min regulation
GSE117296	AT1G11330	-0.746274	0.00530533	systemic 4min regulation
GSE117296	AT2G03120	-0.747171	0.00745983	systemic 8min regulation
GSE117296	AT1G26960	-0.748064	0.00053869	systemic 2min regulation
GSE117296	AT3G23920	-0.748779	0.000213081	local 8min regulation
GSE117296	AT2G05320	-0.750985	0.00289248	systemic 8min regulation
GSE117296	AT4G28270	-0.751037	0.0149666	local 2min regulation
GSE117296	AT4G38800	-0.751256	0.00253705	local 2min regulation
GSE117296	AT3G27870	-0.752417	0.0201826	systemic 2min regulation
GSE117296	AT3G03550	-0.754783	0.00337041	systemic 2min regulation
GSE117296	AT5G25460	-0.757569	0.00332062	local 2min regulation
GSE117296	AT5G56860	-0.75791	0.00248591	local 8min regulation
GSE117296	AT3G61010	-0.758619	0.00794267	systemic 2min regulation
GSE117296	AT1G06700	-0.760629	0.0222696	local 2min regulation
GSE117296	AT4G02130	-0.760669	0.0424082	local 2min regulation
GSE117296	AT2G29170	-0.762029	0.000885968	systemic 4min regulation
GSE117296	AT3G45040	-0.762452	0.0043646	local 2min regulation
GSE117296	AT1G72150	-0.763244	0.0088243	local 2min regulation
GSE117296	AT5G58710	-0.763431	0.000281467	systemic 8min regulation
GSE117296	AT5G08660	-0.765322	0.0198158	systemic 2min regulation
GSE117296	AT1G01520	-0.766826	0.0108046	local 8min regulation
GSE117296	AT3G11010	-0.767442	0.0155443	local 8min regulation
GSE117296	AT2G26190	-0.767526	0.000890859	local 2min regulation
GSE117296	AT5G13710	-0.768788	0.00910552	systemic 2min regulation
GSE117296	AT2G41090	-0.769409	0.0466787	systemic 4min regulation
GSE117296	AT2G45920	-0.772581	0.0466133	local 8min regulation
GSE117296	AT4G23260	-0.772742	0.00974954	local 4min regulation
GSE117296	AT4G29950	-0.772945	0.0175534	local 2min regulation
GSE117296	AT1G60490	-0.775086	0.0478438	local 2min regulation
GSE117296	AT1G09140	-0.778864	0.0194885	local 8min regulation
GSE117296	AT4G27440	-0.779985	0.0198519	systemic 2min regulation
GSE117296	AT3G62600	-0.78207	0.00199781	systemic 4min regulation
GSE117296	AT5G19120	-0.782508	0.0364684	systemic 4min regulation
GSE117296	AT1G02340	-0.782578	0.0197196	systemic 4min regulation
GSE117296	AT1G48570	-0.782786	0.0347792	local 2min regulation
GSE117296	AT1G52540	-0.783593	0.0231257	systemic 2min regulation
GSE117296	AT1G20693	-0.786434	0.0123293	local 2min regulation
GSE117296	AT3G11240	-0.786744	0.02783	systemic 2min regulation
GSE117296	AT1G47510	-0.78705	0.00461237	local 8min regulation
GSE117296	AT4G23270	-0.788152	0.0406527	local 2min regulation
GSE117296	AT4G36470	-0.788387	0.00179024	systemic 8min regulation
GSE117296	AT3G07760	-0.789514	0.00134223	local 2min regulation
GSE117296	AT4G16860	-0.791466	0.00600387	local 8min regulation
GSE117296	AT4G29950	-0.791899	1.09431e-05	systemic 8min regulation
GSE117296	AT4G36150	-0.792516	0.00614162	systemic 2min regulation
GSE117296	AT5G65630	-0.793312	0.00170045	local 8min regulation
GSE117296	AT3G48630	-0.793757	0.0139171	local 8min regulation
GSE117296	AT1G09250	-0.796928	0.025607	systemic 8min regulation
GSE117296	AT4G28070	-0.798602	0.00152953	local 2min regulation
GSE117296	AT5G44020	-0.798623	0.000556793	local 2min regulation
GSE117296	AT5G04410	-0.798698	0.000341233	local 8min regulation
GSE117296	AT4G28400	-0.799044	0.00549517	systemic 8min regulation
GSE117296	AT4G29050	-0.799184	0.0383406	systemic 2min regulation
GSE117296	AT4G29950	-0.799527	0.00058317	systemic 2min regulation
GSE117296	AT2G17130	-0.802816	0.0153568	systemic 8min regulation
GSE117296	AT4G12420	-0.804774	0.0456974	systemic 2min regulation
GSE117296	AT4G11280	-0.804869	0.0289203	local 4min regulation
GSE117296	AT2G17230	-0.806296	0.0464732	systemic 8min regulation
GSE117296	AT1G13000	-0.807379	4.52633e-06	local 2min regulation
GSE117296	AT3G13560	-0.807429	0.0308335	systemic 8min regulation
GSE117296	AT2G37150	-0.80783	0.0105464	local 2min regulation
GSE117296	AT4G18700	-0.808341	0.0380069	local 2min regulation
GSE117296	AT1G52870	-0.808461	0.000206043	local 8min regulation
GSE117296	AT5G62570	-0.809511	0.00686164	local 8min regulation
GSE117296	AT1G03370	-0.809633	0.0346748	systemic 8min regulation
GSE117296	AT3G09450	-0.811179	0.00133254	local 8min regulation
GSE117296	AT4G23180	-0.811259	0.00011446	systemic 8min regulation
GSE117296	AT5G20190	-0.811493	0.00116869	local 2min regulation
GSE117296	AT2G25850	-0.81212	0.0212837	systemic 2min regulation
GSE117296	AT3G50500	-0.813055	0.0131775	systemic 2min regulation
GSE117296	AT3G12740	-0.814116	0.031133	systemic 8min regulation
GSE117296	AT2G46830	-0.814545	0.00117274	systemic 2min regulation
GSE117296	AT5G42020	-0.815709	0.0156895	systemic 4min regulation
GSE117296	AT3G60130	-0.81589	0.00586191	systemic 2min regulation
GSE117296	AT5G56010	-0.815952	0.00738673	local 8min regulation
GSE117296	AT1G30755	-0.816054	0.0420175	systemic 4min regulation
GSE117296	AT1G61100	-0.818147	0.0127593	systemic 2min regulation
GSE117296	AT2G01650	-0.8185	0.0453045	systemic 8min regulation
GSE117296	AT5G51290	-0.820862	0.00252508	local 2min regulation
GSE117296	AT4G39090	-0.820978	0.00145624	local 2min regulation
GSE117296	AT5G43460	-0.821218	0.038446	local 2min regulation
GSE117296	AT4G26400	-0.825525	0.0159929	local 8min regulation
GSE117296	AT1G77960	-0.825724	0.0283929	local 4min regulation
GSE117296	AT4G08470	-0.825737	0.0358321	systemic 4min regulation
GSE117296	AT5G40910	-0.826547	0.000434976	systemic 2min regulation
[truncated: 3,489 more rows]
