# Supplementary material for: Transcriptomic Data Meta-Analysis Sheds Light on High Light Response in Arabidopsis thaliana L
Source: Int J Mol Sci. 2022 Apr 18;23(8):4455. doi: 10.3390/ijms23084455 (PMC9026532; doi:10.3390/ijms23084455)
Supplement: Supplementary file 1 [file ijms-23-04455-s001.zip › S3.xlsx]

## Sheet: Лист1
Table S3
Top of the list of differentially expressed genes according to ranking procedure
AT1G65486
AT1G57770
AT1G78930
AT5G45630
AT4G03450
AT4G29950
AT3G62600
AT5G18170
AT3G46230
AT1G66230
AT1G31540
AT3G25717
AT5G65010
AT3G22840
AT3G28080
AT4G15770
AT3G47340
AT5G03290
AT1G72920
AT4G11660
AT3G13080
AT2G29300
AT2G29290
AT4G39980
AT1G35710
AT3G53420
AT3G50060
AT1G16350
AT1G30900
AT1G49500
AT4G16630
AT3G13100
AT4G18010
AT1G27730
AT1G79700
AT2G15080
AT1G20510
AT4G14690
AT2G26560
AT1G52200
AT4G23200
AT1G04310
AT3G47470
AT1G52565
AT5G51440
AT2G34430
AT4G15640
AT5G54710
AT5G45950
AT1G48100
AT5G05410
AT2G31060
AT3G51910
AT4G25730
AT2G37260
AT5G54610
AT5G10760
AT4G26530
AT4G26600
AT5G60950
AT1G25260
AT2G06050
AT5G67190
AT3G28510
AT1G19570
AT5G08760
AT1G79150
AT5G56100
AT2G16720
AT5G20250
AT4G30610
AT3G11964
AT1G73830
AT1G08460
AT5G26340
AT1G43910
AT1G08610
AT2G40460
AT2G47730
AT5G55730
AT5G59820
AT1G56510
AT5G47230
AT5G15550
AT4G25110
AT4G23570
AT2G19310
AT1G80840
AT1G29940
AT5G62350
AT1G25230
AT4G29330
AT2G40890
AT4G37310
AT4G34790
AT2G31880
AT3G12150
AT1G64660
AT3G09830
AT5G52750
AT1G63750
AT2G27580
AT5G42760
AT3G28210
AT5G15450
AT4G17490
AT5G07990
AT3G19850
AT3G22910
AT5G48030
AT2G29170
AT1G63860
AT5G41740
AT2G14610
AT4G36990
AT1G45191
AT5G25460
AT3G03000
AT1G69490
AT1G29880
AT1G68840
AT3G12740
AT2G20142
AT3G63210
AT3G57490
AT3G09720
AT4G28510
AT3G23940
AT3G04210
AT3G49530
AT1G60190
AT5G25260
AT1G66880
AT3G13940
AT2G31865
AT2G29500
AT1G19330
AT1G07000
AT3G11010
AT3G18290
AT3G61920
AT4G28270
AT1G25440
AT2G19870
AT4G08870
AT2G26530
AT5G25280
AT1G52400
AT5G19240
AT2G44740
AT1G14880
AT2G23690
AT3G07010
AT5G54130
AT1G25550
AT1G21250
AT5G45490
AT2G26190
AT3G46600
AT2G13790
AT3G08970
AT1G48920
AT1G29450
AT1G68440
AT5G47455
AT1G21050
AT2G18900
AT4G01080
AT1G10740
AT1G03090
AT2G31800
AT5G61590
AT3G08940
AT3G12580
AT4G25100
AT1G68190
AT2G33580
AT4G11280
AT3G16240
AT4G17500
AT5G47560
AT1G30070
AT1G35210
AT1G28370
AT3G12050
AT4G36580
AT2G24600
AT1G23205
AT2G42750
AT1G01310
AT5G59430
AT1G66090
AT2G33380
AT2G40360
AT2G20750
AT5G49910
AT2G30020
AT2G22980
AT4G02930
AT1G10522
AT1G04570
AT4G37910
AT4G34710
AT1G01830
AT2G43010
AT1G03360
AT5G45650
AT5G44020
AT1G01520
AT1G47395
AT1G73805
AT5G27120
AT1G78080
AT1G30530
AT1G08930
AT1G54820
AT5G04340
AT1G31173
AT5G13930
AT2G37040
AT1G02930
AT3G47640
AT5G56020
AT5G49760
AT3G50950
AT4G18270
AT4G05070
AT2G38760
AT1G21130
AT3G10985
AT3G50770
AT1G60850
AT5G25440
AT1G64980
AT4G23310
AT1G71260
AT1G33590
AT5G24155
AT4G16590
AT1G77210
AT1G26800
AT3G03780
AT3G47480
AT5G03760
AT1G16720
AT3G17611
AT3G29370
AT1G56720
AT3G52140
AT2G03590
AT4G21380
AT5G55960
AT1G44414
AT2G23000
AT2G32680
AT1G07430
AT2G47440
AT3G23550
AT2G28000
AT4G16146
AT3G23120
AT5G20190
AT3G22231
AT5G11260
AT4G35770
AT5G48930
AT5G26030
AT3G10530
AT5G65860
AT5G02190
AT4G21320
AT3G23170
AT2G04495
AT2G47180
AT1G69260
AT4G27652
AT1G69200
AT4G34290
AT2G47130
AT1G22190
AT1G63810
AT1G08450
AT3G12920
AT3G57950
AT5G15330
AT1G55530
AT3G14770
AT3G45060
AT3G02040
AT4G18280
AT5G03210
AT5G16200
AT3G63060
AT1G24140
AT3G28270
AT1G06080
AT4G36500
AT4G19410
AT2G04030
AT5G57655
AT5G08610
AT2G42220
AT4G15260
AT2G34357
AT2G39240
AT1G74710
AT3G05640
AT5G03553
AT3G18130
AT1G76110
AT3G14200
AT1G34760
AT4G34410
AT4G35850
AT5G26920
AT1G03130
AT4G23270
AT5G54165
AT3G57520
AT5G14060
AT3G61190
AT1G49760
AT2G26440
AT1G70700
AT1G80270
AT1G02205
AT5G05270
AT5G49330
AT1G02380
AT5G53550
AT5G41080
AT5G04530
AT4G27657
AT1G66350
AT1G02820
AT3G52360
AT1G55450
AT1G24145
AT3G17790
AT3G06530
AT2G34070
AT1G29460
AT3G28180
AT2G46400
AT2G44080
AT2G25140
AT1G02940
AT1G11700
AT3G55510
AT3G46740
AT5G45110
AT5G08330
AT5G53120
AT2G30770
AT1G22400
AT1G77810
AT1G18570
AT2G33830
AT3G28220
AT2G18300
AT1G66500
AT3G57150
AT5G24530
AT3G47420
AT2G32990
AT4G23600
AT5G48570
AT3G01290
AT5G65730
AT3G05320
AT3G17330
AT3G52370
AT1G06030
AT4G13750
AT1G55260
AT2G43535
AT5G58780
AT5G03130
AT2G42760
AT1G42990
AT5G26860
AT3G04290
AT1G07350
AT3G46090
AT2G34930
AT1G34750
AT2G30600
AT3G51860
AT5G67300
AT1G22280
AT2G32100
AT1G27045
AT4G20260
AT1G67850
AT5G46170
AT5G15830
AT1G74310
AT2G41040
AT3G23920
AT5G56030
AT2G16980
AT4G34150
AT5G11680
AT4G11840
AT3G04640
AT1G66960
AT4G17140
AT4G28390
AT5G18670
AT5G62570
AT3G12610
AT5G23280
AT1G56110
AT1G13608
AT2G32140
AT5G17760
AT1G21500
AT2G39650
AT2G25200
AT1G07050
AT5G11790
AT3G27770
AT1G15870
AT3G07310
AT3G02380
AT2G41250
ATMG00690
AT2G20800
AT4G38560
AT1G04280
AT4G29510
AT1G20450
AT3G60300
AT2G45510
AT1G55020
AT4G10770
AT1G65060
AT4G15248
AT4G04490
AT3G55240
AT2G20020
AT1G56210
AT3G08720
AT1G35140
AT1G10970
AT1G76570
AT1G50745
AT1G05870
AT5G35495
AT5G08520
AT2G45180
AT5G52320
AT5G02760
AT1G72150
AT3G20540
AT3G46620
AT1G72940
AT2G37930
AT4G19700
AT1G72930
AT5G15950
AT1G18740
AT3G22970
AT4G22545
AT4G00620
AT5G11920
AT3G23810
AT4G00750
AT1G70290
AT5G08620
AT4G28070
AT5G62990
AT3G07050
AT3G18050
AT2G30250
AT3G51840
AT1G11260
AT1G10760
AT5G52882
AT1G51680
AT5G25140
AT2G15042
AT1G15002
AT2G26150
AT3G29590
AT3G01700
AT1G14700
AT1G19050
AT1G33960
AT3G10300
AT1G31660
AT1G63690
AT2G03310
AT1G48460
AT4G02130
AT2G20560
AT4G18880
AT1G29910
AT5G16930
AT5G03350
AT1G72416
AT1G80420
AT5G24780
AT1G64230
AT5G64510
AT2G36750
AT1G08650
AT2G18120
AT3G25010
AT2G25900
AT2G27420
AT3G46490
AT3G58120
AT1G20823
AT4G20860
AT5G66210
AT3G25795
AT3G14620
AT5G13740
AT1G67970
AT4G31800
AT3G13470
AT3G28540
AT1G07400
AT4G18253
AT3G15140
AT2G14560
AT3G12320
AT1G72440
AT2G30010
AT5G14580
AT1G27210
AT1G75100
AT1G22160
AT2G38120
AT1G23710
AT3G19970
AT5G41750
AT5G03990
AT1G80130
AT3G59670
AT5G24660
AT4G33920
AT5G20630
AT3G60130
AT5G18820
AT4G23150
AT5G12030
AT5G27395
AT1G09390
AT4G29020
AT4G33050
AT3G47820
AT1G47400
AT1G59865
AT1G57990
AT5G40780
AT3G44990
AT5G22380
AT3G53940
AT1G36622
AT1G63880
AT3G15790
AT2G46710
AT2G37940
AT4G35780
AT4G25490
AT5G14520
AT5G08770
AT1G75490
AT3G14720
AT3G60415
AT2G01420
AT4G24340
AT3G04220
AT4G26780
AT5G06320
AT3G13310
AT5G04150
AT5G18310
AT1G50920
AT3G23990
AT3G13750
AT5G10250
AT5G61600
AT1G16030
AT5G62020
AT5G48880
AT5G53290
AT4G25340
AT2G46510
AT3G06070
AT1G69870
AT3G50910
AT5G58070
AT2G30930
AT1G13430
AT4G27450
AT3G51800
AT4G28755
AT3G57000
AT2G43680
AT5G44680
AT1G51660
AT1G15510
AT1G07040
AT4G12720
AT3G52400
AT5G63980
AT5G08600
AT3G02170
AT1G61340
AT1G48020
AT5G67480
AT1G73540
AT5G47830
AT3G03250
AT5G57560
AT1G27770
AT1G70820
AT5G52310
AT1G14250
AT5G66540
AT1G23030
AT4G22880
AT3G52800
AT4G25470
AT5G37670
AT2G40000
AT2G44840
AT2G46430
AT1G53540
AT2G23010
AT1G53700
AT1G59870
AT1G64390
AT3G06500
AT2G17880
AT5G54490
AT1G11840
AT5G25250
AT3G27250
AT3G25770
AT5G44530
AT5G59720
AT2G26840
AT3G57260
AT2G17040
AT5G54160
AT1G31330
AT5G03555
AT2G29310
AT1G73870
AT2G36880
AT1G55230
AT3G50480
AT5G10380
AT5G06980
AT2G22240
AT4G39364
AT4G30700
AT3G57940
AT5G50950
AT3G51330
AT3G53830
AT3G60390
AT2G30766
AT1G15440
AT4G13395
AT1G33720
AT4G23220
AT1G68520
AT1G48480
AT2G37180
AT5G51465
AT4G17340
AT1G76600
AT2G36885
AT5G46900
AT4G11460
AT3G13450
AT1G20010
AT2G44380
AT5G22650
AT4G34390
AT5G12110
AT3G56990
AT5G54940
AT1G52880
AT3G12270
AT1G70000
AT5G60270
AT3G58660
AT1G76040
AT4G12400
AT3G15000
AT4G16370
AT3G11820
AT5G12020
AT3G57410
AT5G13710
AT5G22920
AT4G09730
AT4G36850
AT2G32120
AT3G48090
AT3G45860
AT2G36050
AT5G20110
AT5G40010
AT1G26790
AT1G06360
AT3G12830
AT1G14520
AT3G50800
AT1G64720
AT1G79060
AT1G21520
AT1G44350
AT5G24200
AT5G13210
AT5G20790
AT1G11790
AT1G72240
AT3G57530
AT1G12780
AT1G29670
AT4G02550
AT1G71030
AT4G29780
AT5G19190
AT5G52640
AT5G01720
AT1G79920
AT3G24420
AT1G24580
AT4G04500
AT5G09840
AT1G48570
AT1G72900
AT2G33210
AT5G44110
AT2G27840
AT5G24210
AT2G29540
AT1G78570
AT2G35040
AT3G06080
AT3G24000
AT3G16050
AT1G51270
AT2G32970
AT4G23260
AT5G01820
AT1G21270
AT3G62070
AT1G05570
AT2G22500
AT3G62260
AT5G25610
AT5G05250
AT1G07135
AT2G06510
AT5G55280
AT2G36800
AT3G17185
AT4G20020
AT1G70530
AT5G47610
AT5G39660
AT5G02290
AT3G25780
AT5G44568
AT4G08930
AT3G03060
AT3G17465
AT4G02050
AT1G73066
AT4G10500
AT1G44575
AT2G46240
AT5G66070
AT2G38750
AT5G67420
AT1G09070
AT5G09590
AT4G25200
AT3G61890
AT4G04570
AT2G45560
AT1G21750
AT5G58430
AT2G46940
AT4G24280
AT1G18330
AT3G51430
AT1G67365
AT1G13990
AT1G67360
AT5G24120
AT3G25882
AT1G73480
AT2G40140
AT3G44860
AT4G26270
AT1G02920
AT3G09350
AT3G05060
AT1G04530
AT4G24830
AT4G01037
AT1G22770
AT1G04770
AT4G14365
AT4G30990
AT1G28670
AT1G69840
AT4G04020
AT1G03850
AT3G48200
AT5G20230
AT3G04910
AT3G56290
AT5G13490
AT5G15580
AT3G19508
AT2G44500
AT4G23493
AT1G66940
AT2G28400
AT5G59670
AT5G63130
AT1G23390
AT5G52250
AT1G23820
AT5G35735
AT1G56120
AT1G76960
AT3G26510
AT4G23810
AT1G02390
AT5G02840
AT5G47910
AT5G54470
AT3G55120
AT4G09150
AT1G07620
AT5G16030
AT1G17380
AT3G29000
AT4G04940
AT2G41100
AT4G14620
AT1G19180
AT5G22270
AT3G16850
AT2G43020
AT5G02050
AT3G22460
AT5G39670
AT2G23610
AT5G56010
AT2G29450
AT5G37600
AT1G29510
AT3G10800
AT1G09932
AT2G46600
AT1G49130
AT5G53400
AT1G22530
AT3G49680
AT3G50930
AT1G17420
AT1G73080
AT4G00700
AT2G40610
AT3G62750
AT5G48380
AT4G17250
AT1G35230
AT1G14205
AT1G13470
AT3G56060
AT1G01060
AT2G25735
AT5G60900
AT2G37870
AT3G23880
AT4G27280
AT4G26150
AT2G30040
AT5G25450
AT1G01720
AT2G38470
AT1G51380
AT2G36630
AT1G21240
AT4G23130
AT1G28330
AT1G54050
AT5G27420
AT1G21120
AT3G48240
AT1G73600
AT3G21890
AT2G36460
AT2G30520
AT1G51140
AT3G13000
AT5G49360
AT4G27130
AT3G57040
AT1G52560
AT4G27560
AT5G53450
AT5G42530
AT3G24500
AT2G22870
AT1G72910
AT3G43670
AT1G44446
AT3G18600
AT1G71000
AT1G30410
AT4G10390
AT3G57460
AT3G03820
AT1G72040
AT1G52930
AT5G15750
AT1G14980
AT5G45500
AT5G58120
AT5G20150
AT3G57450
AT2G24100
AT4G13170
AT5G10550
AT5G63180
AT1G74940
AT1G75700
AT1G20310
AT5G04720
AT1G13360
AT1G20640
AT2G42540
AT3G48640
AT2G37990
AT5G59550
AT2G02950
AT4G01460
AT4G34550
AT1G74560
AT1G52890
AT1G10370
AT5G24590
AT4G14440
AT3G22600
AT3G23480
AT5G05600
AT2G33590
AT3G25020
AT3G56400
AT5G47120
AT2G19670
AT3G56880
AT5G24640
AT5G67340
AT5G23070
AT5G35320
AT1G80440
AT4G23180
AT4G04025
AT1G61580
AT2G18890
AT4G17230
AT1G02450
AT1G54570
AT3G21560
AT3G59820
AT5G18340
AT1G60590
AT2G22990
AT3G25230
AT1G74450
AT1G12090
AT5G17350
AT2G23120
AT1G24147
AT1G61870
AT1G11960
AT4G22010
AT5G44050
AT3G03470
AT1G02370
AT1G66080
AT5G11650
AT5G08180
AT4G39670
AT1G14200
AT5G46470
AT3G15210
AT1G74890
AT5G60800
AT5G16750
AT4G37260
AT1G74930
AT2G23810
AT4G28450
AT1G26920
AT4G19540
AT4G02360
AT3G45970
AT2G24120
AT1G52190
AT1G22330
AT1G30040
AT2G42870
AT4G15850
AT4G36040
AT5G64260
AT4G19160
AT1G19250
AT1G70090
AT3G03840
AT5G42050
AT4G33300
AT5G67330
AT1G13340
AT4G01560
AT5G61030
AT4G14540
AT2G34810
AT5G52760
AT4G12980
AT3G15460
AT1G21550
AT4G22540
AT5G25930
AT3G09440
AT5G55920
AT1G59860
AT5G54630
AT3G24460
AT5G57280
AT2G28500
AT1G19490
AT2G18660
AT1G33170
AT1G61890
AT4G15420
AT1G23280
AT4G24570
AT1G72520
AT5G22100
AT1G01680
AT1G18620
AT1G25275
AT1G74840
AT3G62950
AT5G64310
AT1G74670
AT5G14760
AT3G54020
AT3G07090
AT3G01490
AT2G04050
AT1G01140
AT1G19350
AT5G13200
AT5G59020
AT1G03070
AT3G10020
AT5G24110
AT1G18300
AT5G26690
AT3G45640
AT4G01010
AT1G17870
AT5G18020
AT3G16810
AT1G51940
AT1G63660
AT1G19000
AT1G06180
AT3G29240
AT1G28395
AT4G14400
AT4G35750
AT1G10340
AT5G42020
AT3G21150
AT1G09570
AT4G16860
AT1G20190
AT3G55980
AT1G09250
AT2G21650
AT5G64410
AT5G54585
AT1G78440
AT4G23140
AT3G44750
AT5G44190
AT1G74320
AT4G04840
AT3G46970
AT1G61800
AT2G23320
AT1G06720
AT5G58770
AT5G66650
AT3G56710
AT1G32920
AT3G16720
AT2G26400
AT2G38240
AT3G21540
AT1G29320
AT5G49920
AT2G43340
AT3G17800
AT3G44260
AT2G24762
AT5G17300
AT3G15760
AT4G11890
AT4G36360
AT5G37770
AT1G25360
AT3G01830
AT3G54510
AT2G42710
AT3G27170
AT2G04450
AT5G11090
AT3G50500
AT2G23910
AT2G20880
AT5G06750
AT2G17840
AT2G34620
AT5G66675
AT1G03870
AT1G72820
AT5G60730
AT5G54910
AT5G02490
AT1G78320
AT2G20670
