# Supplementary material for: Transcriptomic Data Meta-Analysis Sheds Light on High Light Response in Arabidopsis thaliana L
Source: Int J Mol Sci. 2022 Apr 18;23(8):4455. doi: 10.3390/ijms23084455 (PMC9026532; doi:10.3390/ijms23084455)
Supplement: Supplementary file 1 [file ijms-23-04455-s001.zip › S4.xlsx]

## Sheet: Лист1
Table S4	Experimental conditions and transcription factor families involved in the regulation of gene expression during high light response
	Experimental conditions & germplazm (Block 1)						TFBS Enrichment (Block 2 for PLS)
Experiment ID	Up/Down regulated gene list	High light duration (min)	age (days)	genotype (Columbia-0 (Col-0) - 0 and Wassilewskija (WS) - 1)	tissue (seedling - 1, mature leaf (local) - 2, mature leaf (systemic) - 3, mature leaf - 4)	High light intensity (PPFD, μmol m-2 s-1)	ABI3VP1	AP2EREBP	ARF	ARID	BBRBPC	BES1	bHLH	bZIP	BZR	C2C2-DOF	C2C2-GATA	C2C2YABBY	C2H2	C3H	CAMTA	CPP	E2FDP	EIL	FAR1	G2like	GeBP	GRF	HB	HSF	LOBAS2	MADS	mTERF	MYB	NAC	ND	Orphan	RAV	REM	RWPRK	S1Falike	SBP	SRS	TCP	Trihelix	WRKY	zfGRF	ZFHD
GSE111062	down	30	7	0	1	1200	3	7	0	0	2	2	6	40	2	21	1	1	16	3	0	1	1	1	1	13	1	0	15	2	2	0	0	55	50	1	2	1	1	0	0	4	0	1	3	13	0	8
GSE111062	down	360	7	0	1	1200	3	32	0	1	1	2	3	32	4	29	0	1	9	2	1	6	0	1	1	16	0	0	22	5	0	3	0	21	38	2	1	0	2	1	0	1	1	5	9	12	1	10
GSE111062	down	720	7	0	1	1200	1	51	1	0	2	2	7	28	3	21	1	1	16	1	0	1	0	0	1	13	0	2	21	4	2	2	1	32	3	2	2	2	2	0	0	5	1	4	9	1	0	9
GSE111062	down	1440	7	0	1	1200	4	6	1	0	2	0	5	28	3	31	0	0	12	4	1	1	0	0	0	10	1	0	21	5	3	2	0	57	53	2	1	2	2	1	0	3	1	7	8	15	1	3
GSE111062	down	2880	7	0	1	1200	1	19	1	0	0	1	5	20	0	26	3	1	13	4	0	6	0	0	0	12	1	2	9	2	2	1	1	31	36	0	1	0	2	2	0	1	0	8	6	29	1	5
GSE111062	down	4320	7	0	1	1200	2	26	0	0	2	1	4	20	4	7	2	1	11	1	0	0	0	0	0	12	1	1	11	6	0	4	0	53	12	1	1	1	2	1	0	4	1	1	2	3	1	11
GSE111062	up	30	7	0	1	1200	2	55	2	1	2	2	7	24	2	33	0	1	11	3	0	1	1	0	1	19	0	0	19	6	4	2	0	65	40	2	1	0	1	0	1	6	0	9	8	35	1	10
GSE111062	up	360	7	0	1	1200	4	38	2	0	0	2	7	23	2	15	1	0	7	4	1	5	2	1	0	18	0	1	14	5	5	1	0	51	22	0	1	1	2	0	1	2	0	7	1	8	0	8
GSE111062	up	720	7	0	1	1200	2	54	0	1	1	0	2	19	0	18	3	0	2	2	0	5	0	1	0	15	1	0	7	11	7	2	1	65	25	1	2	0	0	2	1	1	1	3	9	9	0	7
GSE111062	up	1440	7	0	1	1200	1	69	1	0	0	2	7	35	4	22	2	0	14	2	2	1	2	1	0	21	1	0	6	4	1	0	0	72	36	0	0	2	2	0	1	6	0	2	11	12	1	5
GSE111062	up	2880	7	0	1	1200	3	67	2	0	0	2	7	34	3	32	0	1	17	3	1	6	1	0	1	20	0	2	7	11	7	0	1	47	41	1	1	2	2	2	1	5	1	9	5	1	0	0
GSE111062	up	4320	7	0	1	1200	2	19	1	1	1	2	5	31	4	23	2	1	8	2	2	5	0	1	1	16	1	2	6	9	1	2	0	65	32	0	2	2	2	1	1	7	0	6	8	0	0	9
GSE117296	down	2	25	0	2	2000	1	45	1	0	2	1	4	31	2	2	3	0	16	1	0	0	0	0	0	16	1	2	11	7	10	1	1	47	7	1	1	2	0	2	1	4	1	5	9	0	0	0
GSE117296	down	4	25	0	2	2000	3	53	1	0	1	2	8	30	4	18	2	1	6	1	2	4	0	1	0	10	0	1	20	2	0	3	0	46	38	0	2	0	2	3	1	8	0	8	4	18	0	11
GSE117296	down	8	25	0	2	2000	3	68	1	1	2	2	7	20	3	27	2	1	16	2	1	2	0	1	0	10	1	2	22	4	4	2	1	56	15	1	1	0	2	2	0	9	1	4	11	27	1	7
GSE117296	down	2	25	0	3	2000	2	46	0	0	1	1	5	27	4	2	3	0	13	1	0	0	2	0	1	11	1	2	18	7	6	0	1	48	6	0	1	2	0	3	1	6	1	8	9	0	0	0
GSE117296	down	4	25	0	3	2000	3	19	2	0	2	2	6	26	4	17	1	1	8	3	2	4	1	1	0	4	1	1	19	9	3	1	0	61	18	1	2	0	2	3	0	2	0	8	9	6	0	11
GSE117296	down	8	25	0	3	2000	4	45	1	1	2	2	7	25	4	12	2	1	12	0	0	2	2	1	0	15	1	2	21	4	1	3	0	50	15	1	2	1	2	0	0	9	0	8	6	2	0	10
GSE117296	up	2	25	0	2	2000	2	8	1	0	2	2	4	19	3	33	1	1	16	4	1	0	0	1	1	15	1	0	20	2	1	3	0	41	30	1	1	1	2	2	0	9	0	8	6	33	1	10
GSE117296	up	4	25	0	2	2000	1	14	1	0	0	1	5	36	3	29	0	0	15	4	2	6	1	1	1	21	0	1	4	3	2	4	0	61	27	0	2	0	2	3	0	7	0	9	9	31	0	1
GSE117296	up	8	25	0	2	2000	3	28	1	0	0	2	4	19	3	26	1	0	10	2	0	6	0	1	1	22	1	0	17	0	3	3	1	72	35	1	2	0	2	2	0	8	1	7	6	30	1	8
GSE117296	up	2	25	0	3	2000	3	22	2	0	2	2	3	17	3	31	3	1	9	2	0	3	1	1	1	18	0	2	20	1	1	1	0	33	16	2	1	1	2	1	0	9	1	9	7	11	1	10
GSE117296	up	4	25	0	3	2000	2	14	0	0	0	0	4	21	0	1	0	0	9	1	2	6	0	1	1	1	1	1	13	7	1	1	1	47	54	0	1	1	1	0	1	0	1	0	3	2	0	11
GSE117296	up	8	25	0	3	2000	2	10	1	0	0	2	3	32	3	22	1	1	9	4	0	5	0	1	1	12	1	0	21	8	0	2	1	43	58	1	1	0	1	0	1	4	1	9	8	0	0	11
GSE117298	down	8	25	0	2	2000	3	39	1	0	2	2	8	10	1	32	1	1	14	2	1	1	0	1	1	5	1	0	22	1	2	1	0	76	15	1	2	0	2	1	0	9	0	6	7	2	0	7
GSE117298	down	8	25	0	3	2000	0	4	0	1	0	2	6	10	3	11	1	1	7	0	1	1	0	0	0	7	1	0	17	0	0	3	1	41	56	1	0	1	0	0	0	5	0	1	4	4	0	4
GSE117298	up	8	25	0	2	2000	2	33	2	1	0	2	3	27	3	24	2	0	10	2	0	6	0	1	1	21	1	0	19	0	3	1	0	59	44	1	2	0	2	1	0	2	0	9	10	1	0	10
GSE117298	up	8	25	0	3	2000	3	17	2	1	0	1	3	34	1	24	0	1	10	2	0	6	2	1	1	12	1	0	12	5	3	3	0	62	36	1	2	0	2	1	0	5	0	6	10	23	1	2
GSE134391	down	420	28	0	4	600	3	26	2	1	2	0	7	24	2	30	3	1	11	1	2	5	0	1	1	7	0	0	8	1	1	3	0	28	18	2	2	2	0	0	0	0	0	7	9	34	1	6
GSE134391	up	420	28	0	4	600	1	76	0	0	0	0	5	5	1	3	2	0	9	2	0	0	0	0	0	2	0	2	2	4	9	2	1	23	13	0	0	0	0	2	1	0	1	4	8	1	0	0
GSE132626	up	15	15	0	4	500	2	49	2	0	2	2	7	33	4	12	4	1	9	0	0	4	3	1	1	6	0	0	16	3	7	1	0	47	58	1	2	0	2	2	0	7	0	9	9	30	0	6
GSE132626	down	15	15	0	4	500	4	2	0	0	2	2	4	36	1	34	1	1	10	3	0	6	1	1	0	8	1	0	19	2	1	2	0	61	39	2	2	2	2	1	1	6	0	8	10	1	0	10
GSE132626	up	30	15	0	4	500	2	24	2	1	1	2	8	38	3	7	2	1	15	1	2	6	1	0	1	1	1	2	16	1	7	4	0	46	27	2	0	2	1	0	0	6	0	8	7	37	1	7
GSE132626	down	30	15	0	4	500	2	8	2	0	2	0	4	22	2	17	0	1	15	3	0	6	1	1	1	12	0	0	13	1	4	4	0	53	9	2	0	2	2	0	0	6	1	8	11	0	0	10
GSE132626	up	60	15	0	4	500	2	13	1	1	1	2	3	5	3	2	2	1	7	3	0	5	3	0	0	21	0	1	16	5	4	4	1	47	17	2	0	0	0	0	1	0	0	1	5	34	1	4
GSE132626	down	60	15	0	4	500	2	64	1	0	2	2	8	22	3	34	0	0	11	4	1	6	2	1	1	11	1	0	20	2	5	3	0	29	53	2	2	2	2	2	0	3	0	9	8	4	0	10
GSE132626	up	120	15	0	4	500	1	37	1	1	0	0	3	14	0	8	2	0	4	0	1	0	1	0	0	1	0	2	1	5	6	3	1	44	6	0	2	1	0	2	0	4	0	0	9	24	1	6
GSE132626	down	120	15	0	4	500	2	33	1	1	0	2	6	34	4	20	0	0	10	3	1	6	3	0	0	5	1	0	20	2	11	4	0	36	49	1	1	1	2	2	0	1	0	8	4	2	0	11
GSE132626	up	240	15	0	4	500	1	78	0	1	0	0	2	6	0	16	1	0	9	4	1	0	1	0	1	2	0	1	1	5	9	3	1	52	19	0	0	0	0	0	0	1	1	0	6	22	0	0
GSE132626	down	240	15	0	4	500	3	27	2	1	2	2	8	29	3	33	0	1	13	3	2	6	1	1	1	1	1	0	22	6	2	3	0	47	45	2	2	1	2	2	0	3	0	9	9	10	0	11
GSE132626	up	15	15	1	4	500	2	12	2	0	2	1	4	19	0	30	2	1	12	4	1	5	1	1	1	11	1	0	20	6	0	4	0	50	48	1	1	1	2	1	0	6	1	8	5	10	1	9
GSE132626	down	15	15	1	4	500	2	26	0	0	2	1	3	14	3	30	0	1	8	2	0	3	0	0	0	9	1	0	19	2	4	4	0	66	34	1	2	0	1	2	0	4	0	9	6	18	0	7
GSE132626	up	30	15	1	4	500	2	74	1	0	2	2	8	37	3	31	3	0	13	4	2	3	1	1	1	19	1	0	12	3	1	3	1	52	28	2	1	0	1	1	0	8	1	4	9	26	0	9
GSE132626	down	30	15	1	4	500	3	16	1	0	2	1	6	34	4	29	0	1	14	4	0	6	1	1	1	17	1	0	16	3	3	4	0	35	19	2	1	2	2	0	0	9	0	9	10	12	0	11
GSE132626	up	60	15	1	4	500	2	69	2	1	1	1	5	32	2	24	1	1	12	4	1	5	2	0	1	20	0	0	17	7	3	3	1	52	53	1	2	1	0	1	1	7	0	4	11	33	1	11
GSE132626	down	60	15	1	4	500	3	23	1	0	2	2	8	36	4	34	1	1	14	3	1	6	1	0	1	15	1	0	22	1	7	3	0	25	28	2	1	2	2	3	0	4	0	8	12	10	0	11
GSE132626	up	120	15	1	4	500	1	76	1	0	0	2	2	6	2	3	4	0	8	0	2	0	1	1	1	21	0	2	2	5	10	2	1	28	17	0	0	0	0	1	0	5	1	0	5	6	1	0
GSE132626	down	120	15	1	4	500	2	31	0	0	1	2	5	21	3	17	1	1	12	2	1	1	2	1	1	22	0	0	21	3	5	3	0	26	33	0	0	1	1	1	0	2	0	8	10	4	0	6
GSE132626	up	240	15	1	4	500	1	61	1	0	0	1	4	16	1	13	4	0	7	2	1	2	3	0	1	9	0	2	1	4	7	1	1	20	8	1	0	1	0	0	1	2	0	3	9	0	0	0
GSE132626	down	240	15	1	4	500	1	24	0	1	1	2	6	16	2	27	1	0	15	2	2	6	1	1	1	16	1	2	23	5	2	4	0	45	53	1	2	0	2	3	1	6	1	8	9	20	0	11
