# Supplementary material for: Transcriptomic Data Meta-Analysis Sheds Light on High Light Response in Arabidopsis thaliana L
Source: Int J Mol Sci. 2022 Apr 18;23(8):4455. doi: 10.3390/ijms23084455 (PMC9026532; doi:10.3390/ijms23084455)
Supplement: Supplementary file 1 [file ijms-23-04455-s001.zip › S5.xlsx]

## Sheet: Лист1
Table S5
List of significantly overpresented hexamers in the set of 1151 DEGs
hexamer_sequence	Meta P.Value	Adj.Meta P.Value	Permutation P.Value
ACGCGT|ACGCGT	2.88679e-24	6.00452e-21	0.000999001
CACGTG|CACGTG	1.00712e-15	1.04741e-12	0.000999001
ACGTGG|CCACGT	3.09684e-14	2.14714e-11	0.000999001
ACACGT|ACGTGT	6.13457e-12	3.18998e-09	0.000999001
AACGCG|CGCGTT	1.68582e-10	7.01301e-08	0.000999001
CGCGTA|TACGCG	1.02013e-09	3.53646e-07	0.000999001
CGTGGC|GCCACG	1.13122e-08	3.36134e-06	0.000999001
CGTCCA|TGGACG	6.53209e-07	0.000169834	0.001998
ACGTAA|TTACGT	9.39734e-07	0.000217183	0.001998
CGCGTC|GACGCG	1.10423e-06	0.00022968	0.001998
CGTGTA|TACACG	1.92296e-06	0.000353384	0.001998
CACGTA|TACGTG	2.03875e-06	0.000353384	0.001998
ACGCGG|CCGCGT	2.21364e-06	0.000354183	0.001998
CGTGGA|TCCACG	3.0158e-06	0.000448062	0.001998
CGTCAC|GTGACG	7.11229e-06	0.000986237	0.001998
CGTGTC|GACACG	1.1286e-05	0.00146718	0.001998
AATTAT|ATAATT	1.50292e-05	0.00183887	0.001998
ATATTA|TAATAT	1.7141e-05	0.00195408	0.001998
ACGTGA|TCACGT	1.78498e-05	0.00195408	0.001998
ACGCGC|GCGCGT	3.1515e-05	0.00327756	0.001998
CACGCG|CGCGTG	3.62274e-05	0.00358824	0.001998
CCACGC|GCGTGG	4.67258e-05	0.00441771	0.001998
CACGTC|GACGTG	5.84774e-05	0.00528839	0.001998
AATAAT|ATTATT	6.2134e-05	0.00538495	0.001998
ACTTGG|CCAAGT	7.50329e-05	0.00624274	0.001998
TTATAA|TTATAA	0.000122573	0.00980581	0.002997
ATTAAT|ATTAAT	0.000141251	0.0105919	0.002997
CACGAA|TTCGTG	0.000142584	0.0105919	0.002997
GCCGAC|GTCGGC	0.000177585	0.0125203	0.002997
AACGTG|CACGTT	0.000180581	0.0125203	0.002997
CAGCCG|CGGCTG	0.00019191	0.0128766	0.002997
GTCCAC|GTGGAC	0.000228556	0.0148562	0.003996
ACGTTA|TAACGT	0.000241434	0.0152176	0.003996
CGGCAC|GTGCCG	0.000270343	0.0165256	0.003996
ATAAAT|ATTTAT	0.000278074	0.0165256	0.003996
GAACGC|GCGTTC	0.000309374	0.017875	0.003996
GTGGCA|TGCCAC	0.000322531	0.0180707	0.003996
AATACG|CGTATT	0.000340305	0.0180707	0.003996
AAAACG|CGTTTT	0.000347087	0.0180707	0.003996
TATCCA|TGGATA	0.000347513	0.0180707	0.003996
AGTCAA|TTGACT	0.000421875	0.0214024	0.004995
TCTAGA|TCTAGA	0.000447024	0.0221383	0.004995
ATTTAA|TTAAAT	0.000479256	0.0231826	0.004995
AAGACT|AGTCTT	0.000561007	0.0265203	0.00599401
GCGTCA|TGACGC	0.000683796	0.0316066	0.00699301
TATTAA|TTAATA	0.000702405	0.0317609	0.00699301
CCATTA|TAATGG	0.000737463	0.0326367	0.00699301
CACACG|CGTGTG	0.000770837	0.0334029	0.00699301
GTGACA|TGTCAC	0.000796777	0.0338224	0.00799201
TACGAA|TTCGTA	0.000824265	0.0338955	0.00799201
GACTTA|TAAGTC	0.00083109	0.0338955	0.00799201
ATATAC|GTATAT	0.000866007	0.0344006	0.00799201
GTTGAA|TTCAAC	0.000888271	0.0344006	0.00799201
AAACGA|TCGTTT	0.000893092	0.0344006	0.00799201
GACCAC|GTGGTC	0.000969775	0.0366751	0.00799201
TAAATA|TATTTA	0.00105488	0.0391812	0.00799201
ACAAGT|ACTTGT	0.00107386	0.0391866	0.00799201
ATAACG|CGTTAT	0.00119478	0.0428472	0.00899101
CATTTA|TAAATG	0.00129119	0.0455198	0.00999001
AAACGT|ACGTTT	0.00133279	0.0462033	0.00999001
TAACAA|TTGTTA	0.00139168	0.0474539	0.00999001
