# Supplementary material for: Transcriptomic Data Meta-Analysis Sheds Light on High Light Response in Arabidopsis thaliana L
Source: Int J Mol Sci. 2022 Apr 18;23(8):4455. doi: 10.3390/ijms23084455 (PMC9026532; doi:10.3390/ijms23084455)
Supplement: Supplementary file 1 [file ijms-23-04455-s001.zip › S6.xlsx]

## Sheet: S6
Supplementary Table S6. Coordinates (bp) of regions enriched with hexamers (61 hexamers, 005) in 1151 promoters (1500 bp upstream of TSS) of Arabidopsis thaliana. Occurrences of all hexamers were counted in a 50 bp sliding window with a 5 bp increment. First column - gene ID, second column - start position, third column - end position.
AT1G01060	9	0	85
AT1G01060	9	1240	1355
AT1G01060	9	1380	1470
AT1G01060	9	385	495
AT1G01060	9	555	645
AT1G01060	9	905	995
AT1G01060	9	1010	1075
AT1G01140	9	1450	1510
AT1G01140	9	115	320
AT1G01140	9	440	510
AT1G01140	9	605	670
AT1G01140	9	680	770
AT1G01140	9	930	1045
AT1G01140	9	1040	1165
AT1G01140	9	1225	1360
AT1G01140	9	1335	1430
AT1G01310	9	1085	1165
AT1G01310	9	215	270
AT1G01310	9	405	465
AT1G01310	9	595	755
AT1G01520	9	35	165
AT1G01520	9	320	375
AT1G01520	9	425	490
AT1G01520	9	1375	1500
AT1G01680	9	25	100
AT1G01680	9	450	510
AT1G01680	9	915	1055
AT1G01680	9	1175	1290
AT1G01680	9	1310	1405
AT1G01720	9	285	375
AT1G01720	9	410	475
AT1G01720	9	510	600
AT1G01720	9	680	770
AT1G01720	9	1085	1150
AT1G01830	9	1230	1300
AT1G01830	9	310	400
AT1G01830	9	550	640
AT1G01830	9	675	745
AT1G01830	9	835	925
AT1G01830	9	960	1070
AT1G01830	9	1150	1225
AT1G02205	9	1295	1465
AT1G02205	9	65	145
AT1G02205	9	235	325
AT1G02370	9	380	455
AT1G02370	9	505	595
AT1G02370	9	745	880
AT1G02370	9	1390	1480
AT1G02380	9	805	875
AT1G02380	9	905	995
AT1G02380	9	1120	1195
AT1G02390	9	10	100
AT1G02390	9	1320	1395
AT1G02390	9	1405	1480
AT1G02390	9	180	245
AT1G02390	9	410	505
AT1G02390	9	520	600
AT1G02390	9	725	775
AT1G02390	9	955	1045
AT1G02390	9	1080	1295
AT1G02450	9	0	225
AT1G02450	9	1220	1380
AT1G02450	9	420	675
AT1G02450	9	750	855
AT1G02450	9	845	920
AT1G02450	9	1095	1145
AT1G02820	9	160	250
AT1G02820	9	945	1000
AT1G02820	9	1150	1300
AT1G02820	9	1330	1465
AT1G02920	9	10	65
AT1G02920	9	1275	1365
AT1G02920	9	1440	1510
AT1G02920	9	890	980
AT1G02930	9	1450	1535
AT1G02930	9	210	280
AT1G02930	9	630	715
AT1G02930	9	855	940
AT1G02930	9	980	1080
AT1G02930	9	1130	1220
AT1G02940	9	130	310
AT1G02940	9	605	695
AT1G02940	9	880	975
AT1G02940	9	1010	1100
AT1G02940	9	1175	1245
AT1G02940	9	1345	1465
AT1G03070	9	10	155
AT1G03070	9	1100	1175
AT1G03070	9	1390	1515
AT1G03070	9	210	260
AT1G03070	9	325	380
AT1G03070	9	665	760
AT1G03070	9	885	945
AT1G03070	9	975	1035
AT1G03090	9	1130	1195
AT1G03090	9	1200	1325
AT1G03090	9	315	575
AT1G03090	9	590	660
AT1G03090	9	660	780
AT1G03090	9	795	885
AT1G03090	9	885	1015
AT1G03130	9	1320	1460
AT1G03130	9	700	790
AT1G03130	9	935	1025
AT1G03130	9	1090	1155
AT1G03360	9	735	805
AT1G03360	9	855	940
AT1G03360	9	1305	1370
AT1G03360	9	1380	1485
AT1G03850	9	15	95
AT1G03850	9	1445	1535
AT1G03850	9	135	220
AT1G03850	9	580	640
AT1G03850	9	1060	1135
AT1G03850	9	1120	1220
AT1G03870	9	0	70
AT1G03870	9	1310	1380
AT1G03870	9	1400	1480
AT1G03870	9	90	170
AT1G03870	9	210	345
AT1G03870	9	720	855
AT1G03870	9	1030	1095
AT1G04280	9	135	195
AT1G04280	9	1020	1090
AT1G04280	9	1365	1455
AT1G04310	9	90	185
AT1G04310	9	1165	1260
AT1G04310	9	1245	1335
AT1G04310	9	210	325
AT1G04310	9	470	525
AT1G04310	9	810	900
AT1G04310	9	915	985
AT1G04530	9	260	315
AT1G04530	9	385	450
AT1G04530	9	605	665
AT1G04530	9	830	945
AT1G04530	9	1150	1240
AT1G04570	9	0	75
AT1G04570	9	1250	1345
AT1G04570	9	1360	1455
AT1G04570	9	185	275
AT1G04570	9	365	455
AT1G04570	9	475	555
AT1G04570	9	545	685
AT1G04570	9	840	920
AT1G04570	9	920	995
AT1G04570	9	1010	1135
AT1G04770	9	55	110
AT1G04770	9	1090	1180
AT1G04770	9	1315	1405
AT1G04770	9	205	295
AT1G04770	9	400	540
AT1G04770	9	705	860
AT1G04770	9	900	965
AT1G04770	9	1020	1085
AT1G05570	9	860	980
AT1G05570	9	1055	1130
AT1G05570	9	1360	1450
AT1G05570	9	210	300
AT1G05570	9	340	430
AT1G05570	9	515	605
AT1G05570	9	620	690
AT1G05570	9	705	795
AT1G05870	9	0	50
AT1G05870	9	1440	1495
AT1G05870	9	90	180
AT1G05870	9	340	550
AT1G05870	9	645	755
AT1G05870	9	750	870
AT1G05870	9	895	1025
AT1G05870	9	1010	1095
AT1G05870	9	1140	1230
AT1G06030	9	1340	1470
AT1G06030	9	1070	1135
AT1G06030	9	1190	1280
AT1G06080	9	90	225
AT1G06080	9	430	525
AT1G06080	9	510	590
AT1G06080	9	660	870
AT1G06080	9	910	990
AT1G06080	9	1110	1200
AT1G06080	9	1200	1275
AT1G06180	9	95	170
AT1G06180	9	1290	1380
AT1G06180	9	1440	1495
AT1G06180	9	460	540
AT1G06180	9	785	855
AT1G06180	9	850	930
AT1G06180	9	1040	1130
AT1G06360	9	1030	1120
AT1G06360	9	1385	1510
AT1G06360	9	110	260
AT1G06360	9	330	390
AT1G06360	9	585	660
AT1G06360	9	785	845
AT1G06720	9	190	240
AT1G06720	9	425	500
AT1G06720	9	725	805
AT1G06720	9	875	965
AT1G07000	9	260	380
AT1G07000	9	615	705
AT1G07000	9	825	915
AT1G07040	9	10	80
AT1G07040	9	180	270
AT1G07040	9	430	500
AT1G07040	9	510	570
AT1G07040	9	905	1000
AT1G07040	9	1330	1410
AT1G07050	9	440	515
AT1G07050	9	1010	1060
AT1G07050	9	1450	1535
AT1G07135	9	425	485
AT1G07135	9	505	795
AT1G07135	9	940	1045
AT1G07135	9	1155	1260
AT1G07135	9	1395	1505
AT1G07350	9	185	275
AT1G07350	9	1380	1460
AT1G07400	9	1385	1475
AT1G07430	9	30	85
AT1G07430	9	1220	1310
AT1G07430	9	1300	1380
AT1G07430	9	1445	1515
AT1G07430	9	265	410
AT1G07430	9	455	520
AT1G07430	9	900	950
AT1G07430	9	1020	1100
AT1G07430	9	1140	1220
AT1G07620	9	40	130
AT1G07620	9	150	235
AT1G07620	9	245	335
AT1G07620	9	380	515
AT1G07620	9	590	690
AT1G07620	9	740	890
AT1G07620	9	920	1010
AT1G07620	9	1185	1490
AT1G08450	9	1435	1505
AT1G08450	9	805	895
AT1G08450	9	960	1085
AT1G08460	9	285	355
AT1G08460	9	355	480
AT1G08460	9	730	785
AT1G08460	9	1335	1425
AT1G08460	9	1430	1525
AT1G08610	9	345	420
AT1G08610	9	540	620
AT1G08610	9	635	705
AT1G08610	9	695	875
AT1G08610	9	1050	1140
AT1G08610	9	1145	1235
AT1G08650	9	1070	1130
AT1G08650	9	1325	1435
AT1G08650	9	70	140
AT1G08930	9	0	65
AT1G08930	9	1370	1535
AT1G08930	9	610	665
AT1G08930	9	845	980
AT1G08930	9	985	1240
AT1G09070	9	40	145
AT1G09070	9	1245	1310
AT1G09070	9	1350	1440
AT1G09070	9	225	315
AT1G09070	9	355	430
AT1G09070	9	710	815
AT1G09070	9	820	895
AT1G09070	9	1010	1140
AT1G09250	9	0	70
AT1G09250	9	985	1070
AT1G09250	9	95	185
AT1G09250	9	465	600
AT1G09250	9	695	785
AT1G09250	9	875	950
AT1G09390	9	0	50
AT1G09390	9	95	160
AT1G09390	9	365	425
AT1G09390	9	595	800
AT1G09390	9	965	1055
AT1G09390	9	1200	1370
AT1G09570	9	1240	1290
AT1G09570	9	1420	1515
AT1G09932	9	1275	1375
AT1G09932	9	1375	1465
AT1G09932	9	55	140
AT1G09932	9	255	345
AT1G09932	9	575	665
AT1G09932	9	1000	1120
AT1G10340	9	300	370
AT1G10340	9	615	735
AT1G10340	9	1175	1250
AT1G10340	9	1310	1380
AT1G10340	9	1440	1490
AT1G10370	9	100	190
AT1G10370	9	280	415
AT1G10370	9	860	950
AT1G10370	9	1080	1165
AT1G10370	9	1195	1290
AT1G10370	9	1310	1415
AT1G10522	9	1175	1225
AT1G10522	9	1440	1530
AT1G10522	9	750	815
AT1G10740	9	0	85
AT1G10740	9	1090	1330
AT1G10740	9	1370	1450
AT1G10740	9	155	245
AT1G10740	9	290	390
AT1G10740	9	685	805
AT1G10760	9	145	270
AT1G10760	9	295	450
AT1G10760	9	550	640
AT1G10760	9	715	805
AT1G10760	9	1020	1195
AT1G10760	9	1300	1370
AT1G10970	9	180	245
AT1G10970	9	315	405
AT1G10970	9	990	1065
AT1G10970	9	1335	1395
AT1G11260	9	1300	1475
AT1G11260	9	165	495
AT1G11260	9	635	750
AT1G11260	9	835	925
AT1G11260	9	960	1025
AT1G11260	9	1055	1245
AT1G11700	9	40	220
AT1G11700	9	1135	1250
AT1G11700	9	1325	1405
AT1G11700	9	1425	1475
AT1G11700	9	255	315
AT1G11700	9	350	440
AT1G11700	9	465	545
AT1G11700	9	620	680
AT1G11700	9	685	835
AT1G11700	9	1040	1140
AT1G11790	9	45	200
AT1G11790	9	1370	1450
AT1G11790	9	1430	1515
AT1G11790	9	245	335
AT1G11790	9	435	490
AT1G11790	9	505	650
AT1G11790	9	1225	1350
AT1G11840	9	20	140
AT1G11840	9	200	310
AT1G11840	9	455	540
AT1G11840	9	525	605
AT1G11840	9	900	1030
AT1G11960	9	1055	1215
AT1G11960	9	1220	1310
AT1G11960	9	1435	1505
AT1G11960	9	860	950
AT1G12090	9	25	115
AT1G12090	9	190	245
AT1G12090	9	285	350
AT1G12090	9	460	530
AT1G12090	9	650	815
AT1G12090	9	855	970
AT1G12090	9	1000	1380
AT1G12780	9	1255	1350
AT1G12780	9	190	240
AT1G12780	9	815	885
AT1G12780	9	900	960
AT1G12780	9	1100	1235
AT1G13340	9	1285	1480
AT1G13340	9	370	460
AT1G13340	9	500	605
AT1G13340	9	625	685
AT1G13340	9	755	845
AT1G13340	9	1005	1055
AT1G13340	9	1070	1150
AT1G13360	9	0	80
AT1G13360	9	1185	1330
AT1G13360	9	1325	1390
AT1G13360	9	120	200
AT1G13360	9	215	305
AT1G13360	9	525	615
AT1G13430	9	315	405
AT1G13430	9	1170	1230
AT1G13430	9	1285	1495
AT1G13470	9	575	710
AT1G13470	9	985	1045
AT1G13470	9	1210	1430
AT1G13608	9	110	180
AT1G13608	9	245	395
AT1G13608	9	420	580
AT1G13608	9	720	810
AT1G13608	9	1050	1105
AT1G13608	9	1170	1235
AT1G13608	9	1235	1350
AT1G13608	9	1380	1445
AT1G13990	9	1230	1285
AT1G13990	9	215	265
AT1G13990	9	380	460
AT1G13990	9	770	830
AT1G14200	9	1240	1305
AT1G14200	9	1295	1480
AT1G14200	9	545	595
AT1G14205	9	355	435
AT1G14205	9	645	725
AT1G14205	9	1230	1330
AT1G14205	9	1365	1450
AT1G14250	9	1295	1365
AT1G14250	9	1415	1505
AT1G14250	9	445	505
AT1G14250	9	600	670
AT1G14520	9	1360	1445
AT1G14520	9	770	825
AT1G14520	9	870	960
AT1G14520	9	1110	1165
AT1G14520	9	1265	1355
AT1G14700	9	0	75
AT1G14700	9	965	1075
AT1G14700	9	1405	1515
AT1G14700	9	125	175
AT1G14700	9	400	450
AT1G14700	9	645	735
AT1G14700	9	790	910
AT1G14880	9	1220	1350
AT1G14880	9	1435	1515
AT1G14880	9	95	155
AT1G14880	9	170	255
AT1G14880	9	260	400
AT1G14880	9	520	585
AT1G14880	9	785	875
AT1G14880	9	895	975
AT1G14880	9	1020	1165
AT1G14980	9	20	70
AT1G15002	9	355	575
AT1G15002	9	675	765
AT1G15002	9	875	965
AT1G15002	9	1135	1375
AT1G15440	9	140	245
AT1G15440	9	1075	1165
AT1G15440	9	1260	1410
AT1G15510	9	230	285
AT1G15510	9	1175	1265
AT1G15510	9	1390	1460
AT1G15870	9	120	195
AT1G15870	9	1370	1445
AT1G15870	9	1450	1510
AT1G16030	9	1295	1370
AT1G16030	9	1360	1450
AT1G16030	9	425	505
AT1G16030	9	735	825
AT1G16350	9	55	225
AT1G16350	9	540	590
AT1G16350	9	885	950
AT1G16350	9	1235	1285
AT1G16720	9	105	215
AT1G16720	9	360	450
AT1G16720	9	520	630
AT1G16720	9	865	955
AT1G16720	9	1000	1090
AT1G16720	9	1270	1360
AT1G17380	9	560	625
AT1G17380	9	795	950
AT1G17380	9	1150	1250
AT1G17380	9	1240	1320
AT1G17380	9	1410	1525
AT1G17420	9	980	1100
AT1G17420	9	1190	1295
AT1G17420	9	1295	1370
AT1G17420	9	215	280
AT1G17420	9	305	360
AT1G17420	9	440	495
AT1G17420	9	590	670
AT1G17870	9	780	860
AT1G17870	9	1165	1215
AT1G17870	9	1245	1320
AT1G18300	9	195	270
AT1G18300	9	415	625
AT1G18300	9	740	890
AT1G18300	9	890	1045
AT1G18300	9	1140	1310
AT1G18300	9	1365	1450
AT1G18330	9	415	535
AT1G18330	9	655	745
AT1G18330	9	1090	1180
AT1G18330	9	1230	1295
AT1G18570	9	1010	1100
AT1G18570	9	1280	1405
AT1G18570	9	1400	1490
AT1G18570	9	235	295
AT1G18570	9	405	480
AT1G18570	9	520	575
AT1G18570	9	615	685
AT1G18570	9	765	855
AT1G18570	9	925	1015
AT1G18620	9	325	415
AT1G18620	9	605	695
AT1G18620	9	1205	1310
AT1G18740	9	50	125
AT1G18740	9	1200	1275
AT1G18740	9	1265	1355
AT1G18740	9	1390	1480
AT1G18740	9	305	360
AT1G18740	9	530	645
AT1G18740	9	765	840
AT1G19000	9	1225	1505
AT1G19000	9	125	265
AT1G19000	9	995	1085
AT1G19050	9	845	1010
AT1G19050	9	1055	1205
AT1G19180	9	100	175
AT1G19180	9	175	330
AT1G19180	9	590	705
AT1G19180	9	720	820
AT1G19180	9	995	1060
AT1G19180	9	1175	1335
AT1G19180	9	1415	1470
AT1G19250	9	70	130
AT1G19250	9	1245	1360
AT1G19250	9	150	255
AT1G19250	9	585	635
AT1G19250	9	670	835
AT1G19250	9	1050	1160
AT1G19330	9	1140	1235
AT1G19330	9	1240	1365
AT1G19330	9	330	420
AT1G19330	9	430	500
AT1G19330	9	665	715
AT1G19330	9	785	875
AT1G19330	9	935	1025
AT1G19350	9	85	175
AT1G19350	9	1310	1400
AT1G19350	9	390	470
AT1G19350	9	750	840
AT1G19350	9	910	1010
AT1G19350	9	1180	1260
AT1G19490	9	430	485
AT1G19490	9	670	735
AT1G19490	9	885	975
AT1G19490	9	1020	1110
AT1G19490	9	1095	1230
AT1G19490	9	1280	1395
AT1G19570	9	1310	1500
AT1G19570	9	260	335
AT1G19570	9	1075	1140
AT1G20010	9	30	95
AT1G20010	9	1360	1495
AT1G20010	9	775	900
AT1G20190	9	1380	1470
AT1G20190	9	310	360
AT1G20190	9	430	540
AT1G20190	9	605	805
AT1G20190	9	860	950
AT1G20190	9	1025	1090
AT1G20310	9	1190	1450
AT1G20310	9	315	375
AT1G20310	9	380	470
AT1G20310	9	540	630
AT1G20310	9	895	980
AT1G20310	9	970	1060
AT1G20450	9	0	65
AT1G20450	9	1345	1410
AT1G20450	9	70	130
AT1G20450	9	295	385
AT1G20450	9	410	525
AT1G20450	9	615	670
AT1G20450	9	855	945
AT1G20450	9	960	1035
AT1G20450	9	1045	1160
AT1G20510	9	0	65
AT1G20510	9	710	840
AT1G20510	9	1010	1080
AT1G20510	9	1300	1355
AT1G20640	9	60	135
AT1G20640	9	1150	1240
AT1G20640	9	1380	1470
AT1G20640	9	210	310
AT1G20640	9	445	520
AT1G20640	9	550	645
AT1G20640	9	865	1045
AT1G20823	9	15	95
AT1G20823	9	1260	1360
AT1G20823	9	1350	1515
AT1G20823	9	290	410
AT1G20823	9	480	560
AT1G20823	9	945	1035
AT1G21050	9	0	75
AT1G21050	9	1060	1180
AT1G21050	9	1290	1405
AT1G21050	9	1410	1500
AT1G21050	9	120	170
AT1G21050	9	680	770
AT1G21050	9	950	1020
AT1G21120	9	40	155
AT1G21120	9	1105	1205
AT1G21120	9	1230	1410
AT1G21120	9	1415	1520
AT1G21120	9	170	260
AT1G21120	9	270	365
AT1G21120	9	530	700
AT1G21120	9	820	910
AT1G21130	9	0	50
AT1G21130	9	955	1025
AT1G21130	9	1215	1345
AT1G21130	9	70	160
AT1G21130	9	310	410
AT1G21130	9	505	625
AT1G21130	9	640	735
AT1G21130	9	815	895
AT1G21240	9	105	240
AT1G21240	9	1295	1360
AT1G21240	9	300	355
AT1G21240	9	380	455
AT1G21240	9	495	555
AT1G21240	9	775	850
AT1G21240	9	1040	1110
AT1G21250	9	1375	1460
AT1G21250	9	350	450
AT1G21270	9	700	835
AT1G21270	9	860	1000
AT1G21500	9	1280	1345
AT1G21520	9	50	135
AT1G21520	9	210	280
AT1G21520	9	330	415
AT1G21520	9	845	965
AT1G21520	9	1085	1220
AT1G21520	9	1255	1425
AT1G21550	9	0	65
AT1G21550	9	520	585
AT1G21550	9	785	855
AT1G21550	9	985	1075
AT1G21550	9	1145	1200
AT1G21550	9	1340	1405
AT1G21750	9	70	160
AT1G21750	9	1370	1475
AT1G21750	9	595	685
AT1G21750	9	1120	1280
AT1G22160	9	0	85
AT1G22160	9	1210	1525
AT1G22160	9	175	245
AT1G22160	9	230	320
AT1G22160	9	400	520
AT1G22160	9	530	595
AT1G22190	9	190	365
AT1G22190	9	1335	1475
AT1G22190	9	380	440
AT1G22190	9	455	545
AT1G22190	9	625	675
AT1G22190	9	690	865
AT1G22190	9	1110	1200
AT1G22280	9	470	520
AT1G22280	9	780	975
AT1G22280	9	1015	1170
AT1G22280	9	1345	1485
AT1G22330	9	50	140
AT1G22330	9	1335	1385
AT1G22330	9	350	475
AT1G22330	9	530	610
AT1G22330	9	610	675
AT1G22330	9	680	770
AT1G22330	9	865	945
AT1G22330	9	1105	1195
AT1G22400	9	1210	1310
AT1G22400	9	1370	1455
AT1G22400	9	1430	1515
AT1G22400	9	775	830
AT1G22400	9	870	1005
AT1G22530	9	20	110
AT1G22530	9	1160	1250
AT1G22770	9	15	230
AT1G22770	9	250	315
AT1G22770	9	475	555
AT1G22770	9	550	645
AT1G22770	9	950	1075
AT1G22770	9	1100	1180
AT1G23030	9	40	95
AT1G23030	9	1225	1315
AT1G23030	9	1330	1495
AT1G23030	9	155	245
AT1G23030	9	310	360
AT1G23030	9	390	455
AT1G23030	9	520	695
AT1G23030	9	765	850
AT1G23030	9	1030	1110
AT1G23030	9	1100	1175
AT1G23205	9	845	1015
AT1G23205	9	1145	1265
AT1G23205	9	1305	1475
AT1G23205	9	155	245
AT1G23205	9	330	420
AT1G23205	9	525	610
AT1G23280	9	1380	1495
AT1G23280	9	545	605
AT1G23280	9	680	775
AT1G23280	9	1000	1080
AT1G23280	9	1205	1275
AT1G23390	9	55	110
AT1G23390	9	1410	1500
AT1G23390	9	265	340
AT1G23390	9	465	555
AT1G23390	9	670	815
AT1G23390	9	940	1000
AT1G23710	9	20	95
AT1G23710	9	990	1135
AT1G23710	9	1110	1190
AT1G23710	9	1230	1325
AT1G23710	9	1390	1460
AT1G23710	9	130	220
AT1G23710	9	365	455
AT1G23710	9	570	640
AT1G23710	9	640	725
AT1G23710	9	710	790
AT1G23710	9	835	990
AT1G23820	9	20	70
AT1G23820	9	1390	1520
AT1G23820	9	180	290
AT1G23820	9	325	375
AT1G23820	9	450	540
AT1G23820	9	815	895
AT1G23820	9	1265	1320
AT1G24140	9	0	195
AT1G24140	9	230	355
AT1G24140	9	520	755
AT1G24140	9	770	905
AT1G24140	9	960	1050
AT1G24140	9	1065	1160
AT1G24140	9	1170	1260
AT1G24140	9	1355	1495
AT1G24145	9	0	85
AT1G24145	9	1315	1390
AT1G24145	9	1400	1490
AT1G24145	9	180	285
AT1G24145	9	835	925
AT1G24145	9	1060	1180
AT1G24147	9	25	115
AT1G24147	9	1400	1450
AT1G24147	9	440	505
AT1G24147	9	575	755
AT1G24580	9	5	95
AT1G24580	9	1275	1365
AT1G24580	9	1365	1470
AT1G24580	9	175	270
AT1G24580	9	825	885
AT1G25230	9	0	90
AT1G25230	9	1095	1170
AT1G25230	9	1260	1315
AT1G25230	9	265	340
AT1G25230	9	425	480
AT1G25230	9	555	660
AT1G25230	9	665	825
AT1G25230	9	990	1080
AT1G25260	9	1315	1400
AT1G25260	9	125	215
AT1G25260	9	220	360
AT1G25260	9	415	490
AT1G25260	9	625	705
AT1G25260	9	890	1025
AT1G25260	9	1165	1315
AT1G25275	9	0	125
AT1G25275	9	1400	1515
AT1G25275	9	250	315
AT1G25275	9	820	875
AT1G25275	9	1000	1075
AT1G25275	9	1170	1235
AT1G25360	9	55	190
AT1G25360	9	1320	1400
AT1G25360	9	1425	1490
AT1G25360	9	665	740
AT1G25440	9	1370	1450
AT1G25440	9	90	245
AT1G25440	9	405	495
AT1G25440	9	870	1095
AT1G25440	9	1190	1280
AT1G25550	9	0	80
AT1G25550	9	560	610
AT1G25550	9	680	735
AT1G26790	9	0	95
AT1G26790	9	1275	1330
AT1G26790	9	355	495
AT1G26790	9	515	685
AT1G26790	9	820	885
AT1G26800	9	145	210
AT1G26800	9	1185	1240
AT1G26800	9	1290	1355
AT1G26800	9	1360	1430
AT1G26800	9	375	440
AT1G26800	9	640	690
AT1G26800	9	995	1085
AT1G26920	9	5	60
AT1G26920	9	1350	1505
AT1G26920	9	190	280
AT1G26920	9	330	420
AT1G26920	9	490	580
AT1G26920	9	855	935
AT1G26920	9	980	1070
AT1G26920	9	1085	1270
AT1G26920	9	1285	1345
AT1G27045	9	20	345
AT1G27045	9	385	480
AT1G27045	9	525	635
AT1G27045	9	625	775
AT1G27045	9	900	995
AT1G27045	9	995	1080
AT1G27045	9	1190	1260
AT1G27210	9	30	130
AT1G27210	9	285	375
AT1G27210	9	500	630
AT1G27210	9	675	795
AT1G27210	9	925	995
AT1G27210	9	1120	1305
AT1G27210	9	1315	1385
AT1G27730	9	1275	1365
AT1G27730	9	165	335
AT1G27730	9	325	410
AT1G27730	9	655	780
AT1G27770	9	295	350
AT1G27770	9	380	445
AT1G27770	9	1160	1225
AT1G27770	9	1305	1385
AT1G27770	9	1380	1470
AT1G28330	9	0	60
AT1G28330	9	1200	1255
AT1G28330	9	1380	1505
AT1G28330	9	105	215
AT1G28330	9	300	360
AT1G28330	9	425	520
AT1G28370	9	0	145
AT1G28370	9	1040	1370
AT1G28370	9	1395	1495
AT1G28370	9	155	270
AT1G28370	9	295	395
AT1G28370	9	455	545
AT1G28370	9	565	710
AT1G28370	9	925	1015
AT1G28395	9	0	195
AT1G28395	9	500	570
AT1G28395	9	755	885
AT1G28395	9	895	1000
AT1G28395	9	1185	1250
AT1G28395	9	1380	1465
AT1G28670	9	1325	1405
AT1G28670	9	440	500
AT1G28670	9	550	610
AT1G28670	9	705	785
AT1G28670	9	825	880
AT1G28670	9	1010	1190
AT1G29320	9	200	290
AT1G29320	9	440	530
AT1G29450	9	730	805
AT1G29450	9	995	1050
AT1G29450	9	1210	1300
AT1G29450	9	1440	1500
AT1G29460	9	835	910
AT1G29460	9	55	120
AT1G29460	9	200	260
AT1G29460	9	405	475
AT1G29460	9	495	585
AT1G29510	9	985	1060
AT1G29510	9	1390	1450
AT1G29670	9	0	60
AT1G29670	9	895	985
AT1G29670	9	985	1085
AT1G29670	9	1440	1530
AT1G29670	9	205	295
AT1G29670	9	565	645
AT1G29670	9	765	880
AT1G29880	9	1160	1240
AT1G29880	9	65	125
AT1G29880	9	395	470
AT1G29910	9	15	105
AT1G29910	9	140	220
AT1G29910	9	260	310
AT1G29910	9	455	590
AT1G29910	9	855	915
AT1G29910	9	1205	1295
AT1G29910	9	1450	1520
AT1G29940	9	0	50
AT1G29940	9	1345	1420
AT1G29940	9	105	195
AT1G29940	9	755	845
AT1G30040	9	1040	1160
AT1G30040	9	1235	1340
AT1G30040	9	1320	1410
AT1G30040	9	60	155
AT1G30040	9	150	240
AT1G30040	9	335	425
AT1G30040	9	420	510
AT1G30040	9	540	725
AT1G30040	9	720	840
AT1G30040	9	945	1035
AT1G30070	9	60	230
AT1G30070	9	1245	1300
AT1G30070	9	270	355
AT1G30070	9	480	560
AT1G30070	9	630	685
AT1G30070	9	700	775
AT1G30070	9	805	880
AT1G30070	9	1050	1140
AT1G30070	9	1155	1215
AT1G30410	9	1065	1140
AT1G30410	9	1215	1280
AT1G30410	9	1340	1430
AT1G30410	9	235	325
AT1G30410	9	350	440
AT1G30410	9	560	640
AT1G30530	9	1090	1165
AT1G30530	9	1405	1470
AT1G30530	9	765	935
AT1G30530	9	960	1050
AT1G30900	9	1065	1230
AT1G30900	9	1340	1395
AT1G30900	9	310	400
AT1G30900	9	400	465
AT1G30900	9	900	1035
AT1G31173	9	1215	1315
AT1G31173	9	85	145
AT1G31173	9	445	540
AT1G31173	9	950	1000
AT1G31173	9	1080	1140
AT1G31330	9	55	180
AT1G31330	9	1380	1495
AT1G31330	9	725	850
AT1G31540	9	1350	1435
AT1G31540	9	1435	1490
AT1G31540	9	255	330
AT1G31540	9	470	525
AT1G31540	9	715	835
AT1G31540	9	860	915
AT1G31540	9	955	1130
AT1G31660	9	135	230
AT1G31660	9	260	385
AT1G31660	9	705	830
AT1G31660	9	885	965
AT1G31660	9	965	1060
AT1G31660	9	1180	1300
AT1G32920	9	1375	1465
AT1G32920	9	285	345
AT1G32920	9	745	850
AT1G32920	9	905	985
AT1G32920	9	1045	1130
AT1G32920	9	1125	1230
AT1G33170	9	1255	1330
AT1G33170	9	1355	1450
AT1G33170	9	750	985
AT1G33170	9	1110	1190
AT1G33590	9	45	235
AT1G33590	9	1420	1510
AT1G33590	9	625	675
AT1G33590	9	835	885
AT1G33590	9	910	1070
AT1G33590	9	1240	1330
AT1G33720	9	1355	1430
AT1G33720	9	250	320
AT1G33720	9	885	935
AT1G33720	9	1060	1125
AT1G33720	9	1215	1355
AT1G33960	9	0	50
AT1G33960	9	1240	1300
AT1G33960	9	1320	1390
AT1G33960	9	1445	1525
AT1G33960	9	160	210
AT1G33960	9	885	960
AT1G33960	9	955	1220
AT1G34750	9	5	155
AT1G34750	9	1240	1350
AT1G34750	9	1450	1535
AT1G34750	9	165	255
AT1G34750	9	280	425
AT1G34750	9	460	525
AT1G34750	9	560	620
AT1G34750	9	620	820
AT1G34750	9	855	950
AT1G34750	9	1000	1120
AT1G34760	9	1010	1145
AT1G34760	9	1145	1265
AT1G34760	9	95	240
AT1G34760	9	340	430
AT1G34760	9	880	940
AT1G35140	9	140	200
AT1G35140	9	455	545
AT1G35140	9	890	1090
AT1G35210	9	40	130
AT1G35210	9	145	315
AT1G35210	9	300	430
AT1G35210	9	440	500
AT1G35210	9	610	765
AT1G35210	9	795	900
AT1G35210	9	960	1050
AT1G35210	9	1100	1190
AT1G35230	9	20	100
AT1G35230	9	1165	1335
AT1G35230	9	1385	1475
AT1G35230	9	95	185
AT1G35230	9	320	445
AT1G35230	9	630	720
AT1G35230	9	760	875
AT1G35230	9	920	1030
AT1G35710	9	85	225
AT1G35710	9	235	355
AT1G35710	9	510	630
AT1G35710	9	640	790
AT1G35710	9	780	845
AT1G35710	9	1005	1095
AT1G35710	9	1135	1280
AT1G36622	9	10	85
AT1G36622	9	1245	1335
AT1G36622	9	1385	1515
AT1G36622	9	100	190
AT1G36622	9	245	495
AT1G36622	9	540	660
AT1G36622	9	760	845
AT1G36622	9	835	920
AT1G36622	9	1035	1125
AT1G42990	9	260	350
AT1G42990	9	380	470
AT1G42990	9	540	720
AT1G42990	9	760	995
AT1G42990	9	1125	1215
AT1G42990	9	1220	1295
AT1G42990	9	1290	1395
AT1G43910	9	15	90
AT1G43910	9	1210	1300
AT1G43910	9	1405	1455
AT1G43910	9	100	155
AT1G43910	9	190	265
AT1G43910	9	585	660
AT1G44350	9	0	80
AT1G44350	9	1190	1270
AT1G44350	9	145	235
AT1G44350	9	250	425
AT1G44350	9	430	535
AT1G44350	9	645	730
AT1G44350	9	725	815
AT1G44350	9	885	970
AT1G44414	9	185	275
AT1G44414	9	285	345
AT1G44414	9	380	465
AT1G44414	9	465	575
AT1G44414	9	660	750
AT1G44414	9	1195	1265
AT1G44446	9	1245	1310
AT1G44446	9	1405	1495
AT1G44446	9	170	245
AT1G44446	9	630	725
AT1G44446	9	740	830
AT1G44446	9	985	1080
AT1G44575	9	1280	1370
AT1G44575	9	550	640
AT1G44575	9	790	960
AT1G44575	9	1085	1235
AT1G45191	9	10	105
AT1G45191	9	220	310
AT1G45191	9	335	430
AT1G45191	9	630	760
AT1G45191	9	800	1025
AT1G45191	9	1040	1175
AT1G45191	9	1345	1415
AT1G47395	9	230	320
AT1G47395	9	395	465
AT1G47395	9	785	840
AT1G47395	9	870	960
AT1G47400	9	55	175
AT1G47400	9	1285	1335
AT1G47400	9	305	465
AT1G47400	9	850	905
AT1G47400	9	950	1040
AT1G48020	9	1215	1305
AT1G48020	9	1430	1520
AT1G48100	9	0	75
AT1G48100	9	1060	1175
AT1G48100	9	1355	1445
AT1G48100	9	95	170
AT1G48100	9	260	345
AT1G48100	9	360	470
AT1G48100	9	635	725
AT1G48100	9	720	965
AT1G48100	9	1000	1060
AT1G48460	9	1300	1415
AT1G48460	9	330	390
AT1G48460	9	595	685
AT1G48460	9	720	775
AT1G48480	9	0	50
AT1G48480	9	780	845
AT1G48480	9	900	955
AT1G48480	9	1120	1200
AT1G48480	9	1185	1265
AT1G48480	9	1305	1395
AT1G48480	9	1425	1485
AT1G48480	9	65	175
AT1G48480	9	270	325
AT1G48480	9	465	555
AT1G48570	9	1275	1345
AT1G48570	9	1400	1490
AT1G48570	9	290	365
AT1G48570	9	465	515
AT1G48570	9	855	910
AT1G48920	9	1010	1065
AT1G48920	9	1165	1245
AT1G48920	9	1365	1435
AT1G48920	9	1435	1525
AT1G48920	9	315	425
AT1G48920	9	440	600
AT1G49130	9	1315	1405
AT1G49130	9	400	455
AT1G49130	9	585	645
AT1G49130	9	955	1030
AT1G49500	9	60	150
AT1G49500	9	160	255
AT1G49500	9	300	350
AT1G49500	9	370	530
AT1G49500	9	610	875
AT1G49500	9	1000	1170
AT1G49760	9	1155	1245
AT1G49760	9	55	120
AT1G49760	9	145	275
AT1G49760	9	390	460
AT1G49760	9	765	825
AT1G49760	9	980	1105
AT1G50745	9	110	160
AT1G50745	9	360	435
AT1G50920	9	290	355
AT1G50920	9	500	615
AT1G50920	9	1055	1145
AT1G50920	9	1210	1275
AT1G51140	9	15	75
AT1G51140	9	1225	1315
AT1G51140	9	1365	1465
AT1G51140	9	105	155
AT1G51140	9	180	320
AT1G51140	9	605	685
AT1G51140	9	690	840
AT1G51140	9	940	1040
AT1G51140	9	1065	1205
AT1G51270	9	1300	1465
AT1G51270	9	245	335
AT1G51270	9	650	755
AT1G51270	9	860	1015
AT1G51270	9	1180	1270
AT1G51380	9	0	60
AT1G51380	9	1365	1440
AT1G51660	9	1000	1070
AT1G51660	9	1115	1190
AT1G51660	9	1210	1350
AT1G51660	9	1380	1495
AT1G51660	9	265	345
AT1G51660	9	500	565
AT1G51680	9	55	125
AT1G51680	9	1230	1385
AT1G51680	9	1430	1515
AT1G51680	9	155	250
AT1G51680	9	365	415
AT1G51680	9	785	935
AT1G51680	9	1000	1065
AT1G51940	9	1275	1435
AT1G51940	9	210	300
AT1G51940	9	325	435
AT1G51940	9	650	705
AT1G51940	9	895	1020
AT1G51940	9	1025	1100
AT1G52190	9	75	165
AT1G52190	9	190	345
AT1G52190	9	745	825
AT1G52190	9	895	1005
AT1G52190	9	1115	1445
AT1G52200	9	1045	1095
AT1G52200	9	1255	1415
AT1G52200	9	370	460
AT1G52200	9	500	610
AT1G52200	9	640	710
AT1G52200	9	785	945
AT1G52400	9	85	135
AT1G52400	9	1205	1320
AT1G52400	9	1360	1410
AT1G52400	9	1440	1515
AT1G52400	9	370	535
AT1G52400	9	590	655
AT1G52400	9	950	1040
AT1G52400	9	1095	1165
AT1G52560	9	1165	1270
AT1G52560	9	175	230
AT1G52560	9	525	635
AT1G52560	9	845	915
AT1G52560	9	995	1085
AT1G52565	9	0	50
AT1G52565	9	950	1040
AT1G52565	9	1045	1140
AT1G52565	9	1375	1470
AT1G52565	9	235	315
AT1G52565	9	520	650
AT1G52565	9	715	800
AT1G52565	9	780	870
AT1G52880	9	35	160
AT1G52880	9	1270	1350
AT1G52880	9	1345	1500
AT1G52880	9	330	555
AT1G52880	9	865	945
AT1G52880	9	1040	1095
AT1G52890	9	10	185
AT1G52890	9	1240	1290
AT1G52890	9	1330	1395
AT1G52890	9	1430	1485
AT1G52890	9	405	495
AT1G52890	9	500	595
AT1G52890	9	670	760
AT1G52890	9	845	935
AT1G52890	9	1060	1150
AT1G52930	9	0	60
AT1G52930	9	1410	1505
AT1G52930	9	95	160
AT1G52930	9	435	525
AT1G52930	9	985	1065
AT1G52930	9	1095	1185
AT1G53540	9	55	110
AT1G53540	9	460	575
AT1G53540	9	1305	1455
AT1G53700	9	85	145
AT1G53700	9	185	265
AT1G53700	9	505	685
AT1G53700	9	1030	1120
AT1G54050	9	225	315
AT1G54050	9	1235	1340
AT1G54050	9	1375	1430
AT1G54570	9	15	105
AT1G54570	9	1240	1345
AT1G54570	9	1335	1445
AT1G54570	9	115	210
AT1G54570	9	455	595
AT1G54570	9	905	995
AT1G54820	9	145	225
AT1G54820	9	1185	1260
AT1G54820	9	1295	1365
AT1G54820	9	1370	1445
AT1G54820	9	275	375
AT1G54820	9	535	585
AT1G54820	9	650	740
AT1G54820	9	925	1000
AT1G55020	9	1375	1460
AT1G55020	9	205	275
AT1G55020	9	275	365
AT1G55020	9	350	450
AT1G55020	9	875	965
AT1G55020	9	1045	1225
AT1G55230	9	1425	1480
AT1G55230	9	320	470
AT1G55230	9	595	685
AT1G55230	9	790	865
AT1G55230	9	880	1035
AT1G55230	9	1035	1145
AT1G55230	9	1195	1340
AT1G55260	9	300	480
AT1G55260	9	670	1185
AT1G55260	9	1325	1415
AT1G55450	9	10	65
AT1G55450	9	690	755
AT1G55450	9	1250	1320
AT1G55450	9	1340	1405
AT1G55450	9	1440	1530
AT1G55530	9	1235	1285
AT1G55530	9	1380	1470
AT1G55530	9	870	945
AT1G56110	9	1255	1310
AT1G56110	9	415	495
AT1G56110	9	705	780
AT1G56120	9	255	325
AT1G56120	9	390	470
AT1G56120	9	510	585
AT1G56120	9	640	695
AT1G56120	9	870	945
AT1G56120	9	1425	1505
AT1G56210	9	105	195
AT1G56210	9	220	275
AT1G56210	9	425	515
AT1G56210	9	760	850
AT1G56210	9	985	1205
AT1G56210	9	1310	1400
AT1G56510	9	200	260
AT1G56510	9	315	365
AT1G56510	9	395	475
AT1G56510	9	1110	1190
AT1G56720	9	1255	1365
AT1G56720	9	105	190
AT1G56720	9	385	475
AT1G56720	9	920	1010
AT1G57770	9	1225	1305
AT1G57770	9	1400	1460
AT1G57770	9	305	360
AT1G57770	9	885	965
AT1G57990	9	250	340
AT1G57990	9	620	820
AT1G57990	9	965	1030
AT1G59860	9	1405	1520
AT1G59860	9	465	535
AT1G59860	9	540	630
AT1G59860	9	885	940
AT1G59860	9	970	1190
AT1G59865	9	355	435
AT1G59865	9	500	640
AT1G59865	9	745	820
AT1G59865	9	825	915
AT1G59870	9	1190	1270
AT1G59870	9	1300	1470
AT1G59870	9	370	495
AT1G59870	9	620	680
AT1G59870	9	945	1035
AT1G59870	9	1055	1145
AT1G60190	9	310	375
AT1G60190	9	530	615
AT1G60190	9	725	815
AT1G60190	9	1025	1190
AT1G60190	9	1215	1515
AT1G60590	9	140	245
AT1G60590	9	350	440
AT1G60590	9	530	620
AT1G60590	9	670	745
AT1G60590	9	900	1080
AT1G60590	9	1160	1250
AT1G61340	9	1165	1265
AT1G61340	9	1375	1480
AT1G61340	9	45	140
AT1G61340	9	375	440
AT1G61340	9	660	815
AT1G61340	9	865	945
AT1G61340	9	960	1085
AT1G61580	9	315	580
AT1G61580	9	625	710
AT1G61580	9	785	860
AT1G61580	9	940	1015
AT1G61580	9	1100	1160
AT1G61580	9	1275	1380
AT1G61800	9	10	90
AT1G61800	9	1210	1270
AT1G61800	9	1410	1505
AT1G61800	9	125	215
AT1G61800	9	290	360
AT1G61800	9	370	460
AT1G61800	9	525	605
AT1G61800	9	590	670
AT1G61800	9	800	945
AT1G61800	9	955	1190
AT1G61870	9	25	110
AT1G61870	9	1300	1405
AT1G61870	9	1430	1510
AT1G61870	9	200	280
AT1G61870	9	415	470
AT1G61870	9	995	1065
AT1G61890	9	1260	1350
AT1G61890	9	90	170
AT1G61890	9	205	300
AT1G61890	9	400	595
AT1G61890	9	825	890
AT1G61890	9	1105	1230
AT1G63660	9	335	390
AT1G63660	9	445	495
AT1G63660	9	1195	1275
AT1G63690	9	1320	1505
AT1G63690	9	210	290
AT1G63690	9	1185	1310
AT1G63750	9	1305	1375
AT1G63750	9	1405	1485
AT1G63750	9	180	325
AT1G63750	9	335	390
AT1G63750	9	575	655
AT1G63750	9	815	995
AT1G63750	9	990	1070
AT1G63750	9	1160	1290
AT1G63810	9	30	100
AT1G63810	9	95	185
AT1G63810	9	225	475
AT1G63810	9	510	585
AT1G63810	9	815	960
AT1G63860	9	1185	1270
AT1G63860	9	1380	1435
AT1G63860	9	65	125
AT1G63860	9	720	785
AT1G63880	9	255	305
AT1G63880	9	1320	1400
AT1G64230	9	5	65
AT1G64230	9	620	670
AT1G64230	9	965	1055
AT1G64390	9	995	1110
AT1G64390	9	1255	1415
AT1G64390	9	1450	1505
AT1G64390	9	65	125
AT1G64390	9	380	460
AT1G64390	9	795	875
AT1G64660	9	1380	1470
AT1G64660	9	75	155
AT1G64660	9	175	235
AT1G64660	9	255	470
AT1G64660	9	490	585
AT1G64660	9	655	710
AT1G64660	9	1035	1125
AT1G64720	9	0	70
AT1G64720	9	730	780
AT1G64720	9	1345	1420
AT1G64980	9	1275	1405
AT1G64980	9	1415	1515
AT1G64980	9	785	865
AT1G64980	9	865	1015
AT1G64980	9	1120	1270
AT1G65060	9	1170	1345
AT1G65060	9	265	315
AT1G65060	9	500	590
AT1G65060	9	625	815
AT1G65060	9	1005	1060
AT1G65060	9	1090	1160
AT1G65486	9	60	120
AT1G65486	9	1280	1380
AT1G65486	9	250	370
AT1G65486	9	460	540
AT1G65486	9	565	655
AT1G65486	9	645	790
AT1G66080	9	45	215
AT1G66080	9	720	950
AT1G66080	9	965	1045
AT1G66080	9	1075	1130
AT1G66080	9	1145	1255
AT1G66080	9	1290	1465
AT1G66090	9	620	715
AT1G66090	9	740	960
AT1G66090	9	990	1110
AT1G66090	9	1170	1240
AT1G66090	9	1375	1500
AT1G66230	9	0	85
AT1G66230	9	170	220
AT1G66230	9	400	525
AT1G66230	9	585	765
AT1G66230	9	1210	1460
AT1G66350	9	200	290
AT1G66350	9	585	755
AT1G66350	9	940	1000
AT1G66350	9	1130	1280
AT1G66350	9	1375	1465
AT1G66500	9	0	65
AT1G66500	9	175	260
AT1G66500	9	330	385
AT1G66500	9	450	520
AT1G66500	9	735	825
AT1G66500	9	1075	1165
AT1G66500	9	1345	1495
AT1G66880	9	0	60
AT1G66880	9	440	535
AT1G66880	9	565	840
AT1G66880	9	980	1070
AT1G66880	9	1145	1235
AT1G66940	9	1400	1490
AT1G66940	9	75	130
AT1G66940	9	420	490
AT1G66940	9	605	720
AT1G66940	9	825	890
AT1G66960	9	1095	1230
AT1G66960	9	1245	1335
AT1G67360	9	150	210
AT1G67360	9	1320	1400
AT1G67360	9	670	765
AT1G67365	9	1195	1360
AT1G67365	9	1360	1445
AT1G67365	9	195	255
AT1G67365	9	630	690
AT1G67850	9	1220	1300
AT1G67850	9	1400	1490
AT1G67850	9	595	650
AT1G67850	9	700	790
AT1G67970	9	0	70
AT1G67970	9	1230	1365
AT1G67970	9	1375	1500
AT1G67970	9	420	515
AT1G67970	9	575	760
AT1G67970	9	775	845
AT1G68190	9	275	335
AT1G68440	9	15	65
AT1G68440	9	1140	1340
AT1G68440	9	1415	1470
AT1G68440	9	205	305
AT1G68440	9	320	410
AT1G68440	9	390	575
AT1G68440	9	565	695
AT1G68440	9	725	815
AT1G68440	9	1055	1150
AT1G68520	9	1125	1190
AT1G68520	9	1245	1375
AT1G68520	9	95	185
AT1G68520	9	650	715
AT1G68520	9	845	935
AT1G68520	9	980	1100
AT1G68840	9	5	145
AT1G68840	9	640	905
AT1G68840	9	985	1115
AT1G68840	9	1175	1265
AT1G68840	9	1300	1425
AT1G69200	9	975	1040
AT1G69200	9	1085	1175
AT1G69200	9	1185	1270
AT1G69200	9	240	320
AT1G69200	9	750	845
AT1G69200	9	845	945
AT1G69260	9	60	135
AT1G69260	9	1135	1310
AT1G69260	9	1315	1375
AT1G69260	9	1410	1525
AT1G69260	9	265	350
AT1G69260	9	345	425
AT1G69260	9	415	495
AT1G69260	9	505	645
AT1G69260	9	715	945
AT1G69260	9	960	1055
AT1G69490	9	885	950
AT1G69490	9	1100	1305
AT1G69490	9	1345	1400
AT1G69490	9	155	295
AT1G69490	9	555	635
AT1G69490	9	710	770
AT1G69490	9	780	860
AT1G69840	9	20	110
AT1G69840	9	1315	1480
AT1G69840	9	610	740
AT1G69840	9	1020	1085
AT1G69870	9	105	170
AT1G69870	9	300	375
AT1G69870	9	450	665
AT1G69870	9	685	740
AT1G69870	9	1025	1095
AT1G69870	9	1085	1275
AT1G70000	9	0	105
AT1G70000	9	1200	1405
AT1G70000	9	290	370
AT1G70000	9	525	575
AT1G70000	9	655	745
AT1G70000	9	865	930
AT1G70000	9	940	1005
AT1G70090	9	1065	1170
AT1G70090	9	1325	1395
AT1G70090	9	1395	1465
AT1G70090	9	290	380
AT1G70090	9	640	715
AT1G70090	9	755	845
AT1G70090	9	865	980
AT1G70290	9	1115	1280
AT1G70290	9	225	315
AT1G70290	9	370	460
AT1G70290	9	710	890
AT1G70290	9	1025	1085
AT1G70530	9	1215	1300
AT1G70530	9	115	190
AT1G70530	9	510	705
AT1G70530	9	720	805
AT1G70530	9	815	975
AT1G70530	9	1115	1175
AT1G70700	9	50	105
AT1G70700	9	1295	1455
AT1G70700	9	140	215
AT1G70700	9	640	745
AT1G70700	9	835	890
AT1G70700	9	1090	1150
AT1G70700	9	1215	1280
AT1G70820	9	0	100
AT1G70820	9	120	180
AT1G70820	9	1340	1410
AT1G71000	9	180	320
AT1G71000	9	480	540
AT1G71000	9	545	625
AT1G71000	9	900	965
AT1G71000	9	1165	1345
AT1G71030	9	830	920
AT1G71030	9	1265	1355
AT1G71030	9	45	135
AT1G71030	9	135	220
AT1G71030	9	260	330
AT1G71030	9	480	540
AT1G71260	9	1155	1305
AT1G71260	9	270	350
AT1G71260	9	340	410
AT1G71260	9	520	580
AT1G72040	9	1355	1490
AT1G72040	9	450	525
AT1G72040	9	860	940
AT1G72040	9	950	1040
AT1G72040	9	1080	1155
AT1G72150	9	35	125
AT1G72150	9	1280	1385
AT1G72150	9	1435	1510
AT1G72150	9	215	295
AT1G72150	9	415	490
AT1G72150	9	545	655
AT1G72150	9	855	945
AT1G72150	9	1055	1170
AT1G72240	9	60	120
AT1G72240	9	1155	1235
AT1G72240	9	1225	1305
AT1G72240	9	1355	1445
AT1G72240	9	230	285
AT1G72240	9	600	685
AT1G72240	9	930	1005
AT1G72240	9	995	1085
AT1G72416	9	745	820
AT1G72416	9	865	1045
AT1G72416	9	1135	1210
AT1G72416	9	1375	1515
AT1G72440	9	315	365
AT1G72440	9	455	545
AT1G72440	9	650	715
AT1G72440	9	1160	1230
AT1G72440	9	1355	1470
AT1G72520	9	165	240
AT1G72520	9	380	535
AT1G72520	9	540	630
AT1G72520	9	755	930
AT1G72520	9	955	1090
AT1G72520	9	1255	1430
AT1G72820	9	1125	1210
AT1G72820	9	495	550
AT1G72820	9	730	820
AT1G72820	9	855	935
AT1G72820	9	925	1005
AT1G72900	9	360	440
AT1G72900	9	525	580
AT1G72900	9	1000	1060
AT1G72900	9	1220	1310
AT1G72900	9	1450	1500
AT1G72910	9	380	495
AT1G72910	9	515	605
AT1G72910	9	725	790
AT1G72910	9	960	1010
AT1G72910	9	1160	1300
AT1G72920	9	905	960
AT1G72920	9	1005	1125
AT1G72920	9	30	115
AT1G72920	9	95	230
AT1G72920	9	275	340
AT1G72920	9	450	520
AT1G72920	9	685	750
AT1G72930	9	960	1050
AT1G72940	9	1235	1355
AT1G72940	9	85	170
AT1G72940	9	330	465
AT1G72940	9	510	575
AT1G72940	9	820	870
AT1G73066	9	265	355
AT1G73066	9	670	740
AT1G73066	9	1325	1400
AT1G73080	9	330	420
AT1G73080	9	995	1070
AT1G73080	9	1150	1290
AT1G73480	9	1290	1385
AT1G73480	9	180	230
AT1G73480	9	485	560
AT1G73480	9	665	755
AT1G73480	9	795	1040
AT1G73480	9	1200	1290
AT1G73540	9	0	50
AT1G73540	9	1300	1420
AT1G73540	9	65	140
AT1G73540	9	655	715
AT1G73540	9	940	1230
AT1G73600	9	925	1110
AT1G73600	9	1190	1260
AT1G73600	9	1325	1415
AT1G73600	9	260	310
AT1G73600	9	430	505
AT1G73805	9	65	175
AT1G73805	9	1295	1370
AT1G73805	9	1415	1490
AT1G73805	9	245	345
AT1G73805	9	550	640
AT1G73830	9	330	400
AT1G73830	9	390	490
AT1G73830	9	545	790
AT1G73830	9	830	990
AT1G73830	9	1310	1365
AT1G73870	9	170	220
AT1G73870	9	1355	1430
AT1G73870	9	505	595
AT1G73870	9	880	930
AT1G74310	9	265	395
AT1G74310	9	905	965
AT1G74310	9	1165	1245
AT1G74310	9	1280	1505
AT1G74320	9	30	100
AT1G74320	9	590	655
AT1G74320	9	860	940
AT1G74320	9	1220	1495
AT1G74450	9	1110	1320
AT1G74450	9	1365	1470
AT1G74450	9	460	525
AT1G74450	9	635	810
AT1G74450	9	875	975
AT1G74450	9	1005	1055
AT1G74560	9	1295	1370
AT1G74560	9	1420	1475
AT1G74560	9	80	160
AT1G74560	9	255	385
AT1G74560	9	585	635
AT1G74560	9	700	755
AT1G74560	9	1010	1115
AT1G74560	9	1220	1290
AT1G74670	9	20	125
AT1G74670	9	1145	1195
AT1G74670	9	1405	1490
AT1G74670	9	145	235
AT1G74670	9	330	390
AT1G74670	9	400	490
AT1G74670	9	600	690
AT1G74670	9	795	870
AT1G74710	9	1030	1295
AT1G74710	9	110	240
AT1G74710	9	270	360
AT1G74710	9	470	540
AT1G74710	9	750	825
AT1G74710	9	890	945
AT1G74840	9	1385	1520
AT1G74840	9	490	615
AT1G74840	9	715	840
AT1G74840	9	1030	1080
AT1G74840	9	1115	1205
AT1G74840	9	1235	1355
AT1G74890	9	1330	1390
AT1G74890	9	1105	1165
AT1G74930	9	945	1025
AT1G74930	9	1375	1500
AT1G74930	9	235	370
AT1G74930	9	455	520
AT1G74940	9	725	775
AT1G74940	9	1070	1220
AT1G74940	9	1390	1500
AT1G75100	9	125	215
AT1G75100	9	700	765
AT1G75100	9	1395	1465
AT1G75490	9	10	90
AT1G75490	9	550	605
AT1G75490	9	795	870
AT1G75490	9	955	1045
AT1G75700	9	400	470
AT1G75700	9	665	715
AT1G75700	9	810	865
AT1G75700	9	1310	1365
AT1G75700	9	1435	1525
AT1G76040	9	1040	1120
AT1G76040	9	1245	1330
AT1G76040	9	340	420
AT1G76040	9	430	485
AT1G76110	9	5	90
AT1G76110	9	510	635
AT1G76110	9	1065	1165
AT1G76110	9	1195	1285
AT1G76110	9	1285	1520
AT1G76570	9	1225	1315
AT1G76570	9	550	625
AT1G76570	9	680	750
AT1G76570	9	1035	1115
AT1G76600	9	1030	1155
AT1G76600	9	1270	1435
AT1G76600	9	145	200
AT1G76600	9	395	480
AT1G76600	9	545	610
AT1G76600	9	630	720
AT1G76600	9	845	1035
AT1G76960	9	575	630
AT1G76960	9	735	840
AT1G76960	9	1265	1350
AT1G76960	9	1445	1535
AT1G77210	9	0	70
AT1G77210	9	845	925
AT1G77210	9	70	190
AT1G77210	9	205	265
AT1G77810	9	0	85
AT1G77810	9	1290	1360
AT1G77810	9	1350	1495
AT1G77810	9	395	465
AT1G77810	9	585	675
AT1G77810	9	755	815
AT1G78080	9	1215	1350
AT1G78080	9	1420	1470
AT1G78080	9	285	370
AT1G78080	9	470	575
AT1G78080	9	630	715
AT1G78080	9	870	1065
AT1G78320	9	45	185
AT1G78320	9	245	400
AT1G78320	9	535	625
AT1G78320	9	705	810
AT1G78320	9	1145	1205
AT1G78320	9	1230	1300
AT1G78440	9	0	130
AT1G78440	9	145	355
AT1G78440	9	575	665
AT1G78440	9	825	890
AT1G78440	9	1080	1150
AT1G78570	9	1270	1345
AT1G78570	9	1350	1440
AT1G78570	9	505	575
AT1G78570	9	610	660
AT1G78570	9	750	850
AT1G78570	9	965	1130
AT1G78570	9	1185	1255
AT1G78930	9	1315	1435
AT1G79060	9	0	55
AT1G79060	9	370	475
AT1G79060	9	1030	1120
AT1G79060	9	1135	1225
AT1G79060	9	1265	1355
AT1G79060	9	1425	1515
AT1G79150	9	210	320
AT1G79150	9	395	490
AT1G79150	9	540	630
AT1G79150	9	755	915
AT1G79150	9	1010	1200
AT1G79700	9	1385	1450
AT1G79700	9	180	270
AT1G79700	9	530	620
AT1G79700	9	755	845
AT1G79700	9	905	1040
AT1G79700	9	1185	1240
AT1G79920	9	250	315
AT1G79920	9	885	960
AT1G79920	9	1265	1380
AT1G79920	9	1375	1460
AT1G80130	9	10	125
AT1G80130	9	435	525
AT1G80130	9	775	835
AT1G80130	9	925	1150
AT1G80270	9	1335	1410
AT1G80270	9	1420	1500
AT1G80270	9	280	330
AT1G80270	9	1105	1165
AT1G80420	9	40	120
AT1G80420	9	1150	1240
AT1G80420	9	1360	1480
AT1G80420	9	130	220
AT1G80420	9	220	295
AT1G80420	9	370	505
AT1G80420	9	795	885
AT1G80420	9	1060	1110
AT1G80440	9	0	60
AT1G80440	9	1120	1195
AT1G80440	9	1430	1505
AT1G80440	9	235	350
AT1G80440	9	500	585
AT1G80440	9	590	700
AT1G80440	9	790	1040
AT1G80840	9	100	270
AT1G80840	9	590	640
AT1G80840	9	705	795
AT1G80840	9	795	885
AT1G80840	9	1010	1115
AT1G80840	9	1160	1370
AT2G01420	9	1345	1505
AT2G01420	9	295	380
AT2G01420	9	410	525
AT2G01420	9	680	740
AT2G01420	9	745	825
AT2G01420	9	1045	1130
AT2G02950	9	5	55
AT2G02950	9	1050	1170
AT2G02950	9	1260	1350
AT2G02950	9	1415	1475
AT2G02950	9	85	155
AT2G02950	9	165	290
AT2G02950	9	345	435
AT2G02950	9	590	715
AT2G02950	9	750	865
AT2G03310	9	45	125
AT2G03310	9	1180	1380
AT2G03310	9	1395	1505
AT2G03310	9	195	260
AT2G03310	9	275	350
AT2G03310	9	505	595
AT2G03310	9	660	785
AT2G03590	9	365	440
AT2G03590	9	605	670
AT2G03590	9	840	990
AT2G03590	9	1075	1145
AT2G03590	9	1370	1500
AT2G04030	9	70	130
AT2G04030	9	1355	1435
AT2G04030	9	335	425
AT2G04030	9	520	600
AT2G04030	9	655	770
AT2G04030	9	805	855
AT2G04030	9	865	1025
AT2G04030	9	1010	1230
AT2G04050	9	1370	1455
AT2G04050	9	1445	1525
AT2G04050	9	80	245
AT2G04050	9	505	595
AT2G04050	9	820	910
AT2G04050	9	940	1015
AT2G04050	9	1175	1305
AT2G04450	9	920	1005
AT2G04450	9	1235	1330
AT2G04495	9	1175	1280
AT2G04495	9	1330	1430
AT2G04495	9	200	330
AT2G04495	9	335	415
AT2G04495	9	520	580
AT2G04495	9	740	830
AT2G04495	9	840	910
AT2G04495	9	910	1000
AT2G06050	9	0	165
AT2G06050	9	1360	1450
AT2G06050	9	225	385
AT2G06050	9	400	480
AT2G06050	9	695	750
AT2G06510	9	115	200
AT2G06510	9	805	885
AT2G06510	9	1025	1075
AT2G06510	9	1115	1230
AT2G13790	9	105	190
AT2G13790	9	1315	1465
AT2G13790	9	420	485
AT2G13790	9	735	800
AT2G13790	9	895	975
AT2G14560	9	925	1060
AT2G14560	9	1395	1485
AT2G14560	9	100	170
AT2G14560	9	540	620
AT2G14560	9	795	900
AT2G14610	9	1255	1500
AT2G14610	9	240	355
AT2G14610	9	375	505
AT2G14610	9	660	730
AT2G14610	9	875	925
AT2G15042	9	655	745
AT2G15080	9	795	945
AT2G15080	9	1365	1505
AT2G16720	9	0	55
AT2G16720	9	955	1050
AT2G16720	9	1195	1415
AT2G16720	9	40	130
AT2G16720	9	125	200
AT2G16720	9	350	415
AT2G16720	9	430	495
AT2G16720	9	495	585
AT2G16720	9	615	710
AT2G16720	9	760	925
AT2G16980	9	1325	1450
AT2G16980	9	95	235
AT2G16980	9	395	460
AT2G16980	9	465	545
AT2G16980	9	895	960
AT2G16980	9	990	1185
AT2G17040	9	60	130
AT2G17040	9	235	325
AT2G17040	9	465	605
AT2G17040	9	820	895
AT2G17040	9	915	1060
AT2G17040	9	1425	1495
AT2G17840	9	1260	1315
AT2G17840	9	1385	1520
AT2G17840	9	380	445
AT2G17840	9	530	625
AT2G17840	9	1040	1215
AT2G17880	9	70	235
AT2G17880	9	250	385
AT2G17880	9	640	860
AT2G17880	9	965	1080
AT2G17880	9	1270	1350
AT2G17880	9	1440	1520
AT2G18120	9	1105	1220
AT2G18120	9	1220	1300
AT2G18120	9	1340	1460
AT2G18120	9	1445	1530
AT2G18120	9	275	360
AT2G18120	9	640	815
AT2G18120	9	855	910
AT2G18120	9	1020	1070
AT2G18300	9	275	365
AT2G18300	9	1160	1250
AT2G18300	9	1310	1390
AT2G18300	9	1425	1515
AT2G18660	9	1320	1370
AT2G18660	9	1440	1490
AT2G18660	9	100	190
AT2G18660	9	250	340
AT2G18660	9	385	480
AT2G18660	9	490	565
AT2G18660	9	650	740
AT2G18660	9	855	945
AT2G18890	9	90	145
AT2G18890	9	225	300
AT2G18890	9	305	375
AT2G18890	9	360	500
AT2G18890	9	505	805
AT2G18890	9	825	900
AT2G18890	9	895	975
AT2G18890	9	1055	1145
AT2G18900	9	85	170
AT2G18900	9	1370	1470
AT2G19310	9	230	285
AT2G19310	9	415	630
AT2G19310	9	660	750
AT2G19310	9	935	1050
AT2G19670	9	1165	1235
AT2G19670	9	1450	1500
AT2G19670	9	425	515
AT2G19870	9	1220	1280
AT2G19870	9	1295	1425
AT2G19870	9	135	240
AT2G19870	9	865	955
AT2G19870	9	980	1065
AT2G20020	9	1085	1145
AT2G20020	9	1185	1275
AT2G20020	9	1375	1450
AT2G20020	9	95	165
AT2G20020	9	580	655
AT2G20142	9	1410	1470
AT2G20142	9	320	375
AT2G20142	9	595	650
AT2G20142	9	795	870
AT2G20142	9	1235	1315
[truncated: 4,197 more rows]
