# Supplementary material for: Transcriptomic Data Meta-Analysis Sheds Light on High Light Response in Arabidopsis thaliana L
Source: Int J Mol Sci. 2022 Apr 18;23(8):4455. doi: 10.3390/ijms23084455 (PMC9026532; doi:10.3390/ijms23084455)
Supplement: Supplementary file 1 [file ijms-23-04455-s001.zip › S7.xlsx]

## Sheet: S7
Supplementary Table S7
Regions enriched with hexamers (61 hexamers, 005) in 1151 promoters (1500 bp upstream of TSS) of Arabidopsis thaliana. Occurrences of all hexamers were counted in a 50 bp sliding window with a 5 bp increment.
>AT1G01060:0-85
TTAAAAATTATAAGATTAGTATGTAAGAACTTAAGATATTAATGTGGGTTTTTTTATGTGGTTTTTTTTTATCATATATTATAGG
>AT1G01060:385-495
AATCATCAACTGCATTGTCTTCAGGAATGGATAACGAAGCTCAATATACTACTCCTAATAAGGATAACGACTCTAAGTCGCCCGTTTAATTTAATTATATTGTTGTTAAT
>AT1G01060:555-645
AATTTTATAATTCCAAACATCAACGTAGAGATTTGTGAAATATTTAAATCCGGTTTGTTTGGTTATTTTGGAATAATTTCGGTTATTTCA
>AT1G01060:905-995
GTTTGCTGAATTCCATAAATAAATACTACATGCTTCGGTTAAGACTTAAGAGTAATTAATGTTCCTTAATTTCTACAAATGTTATATAAG
>AT1G01060:1010-1075
TCTCGATGATAATTTGTTGAAATTTTGTATAGGCATTGCATGATATTATATGAAAAGATGAAGAT
>AT1G01140:115-320
CCATAAAGGATAATTAATTGTATCACAAAAAGACAAACACAAATTATTGAATATACCATCACTTATCAGTATATAATTTTATACAAATGCTTTAAATAACAAATATTATGTAGAAAAAGAGAAAAGAAACTTAACTTGGTCAATTTGATCATTTGTGTAAACGATGATGCGGAACATATGCGATAATAATGTTATTGGATGGCAA
>AT1G01140:440-510
CTACAAACCAAGCTAAACCGAAAGTAAATACAAAATCAAACCAAATAATAGTTTGGTTTATATAGGTTTT
>AT1G01140:605-670
TTGCTTTCATATGATGGTGACGTGATGTTTTTGTACCGGACTCAATTATTGGAACGAGTGGTTCA
>AT1G01140:680-770
TTTGCATTTTCTTTTGTTCGTAATATACTAACATATCTAAAAAATTATTGTATCATTATTACTAGTCATGCAATAAATCATCAACTCACA
>AT1G01140:930-1045
CGTTCCCTTTACTCACATCGTCACATGGAAAGATCAACTATTTCAATTATCTATTTATTTATTATCATATACTTTAAATAATCAAATTTAGAACCGTTACAAACAAAAATAAACA
>AT1G01140:1040-1165
AAACAGCTACATCAAATTTAAACAAAAGTAAGTATATGCGAATATTATCATAGATTTAAACAAAATTTGACCAAGATATAACAATCATCATTTAACTACCAACATTTGATATATGTATTTATTGT
>AT1G01140:1225-1360
TTCTACATGAAAAGAATACAACTATATCAAATAATATGATAACAGTCAACTTTGAACATCAGTAGAATGGAATGAATCACTGAAAGATATACTCATATACACATAAAGATTAAGGACATCAAATCACATCCCTTA
>AT1G01140:1335-1430
TAAGGACATCAAATCACATCCCTTACAAATAAAACCATATCCACATAAATTTAAAACCCCAAAATTTTCATAAAATCCATATACTTAAACAGGAG
>AT1G01310:215-270
AATAGTATAAATTAAGATAGATTTTGGTAAATTACTGTTTACGTAATACATAGGG
>AT1G01310:405-465
TTATTGGTTTAATAATCTACTTTATCACCTAATTACATTGAATACGTGTTAACTTGAGCT
>AT1G01310:595-755
AACATTTGCGGATATACAAGTAACGAAAAACAACACTTGAAATTTAATGAAAAGATGTTAGAAAGTATAAAACATTAATGAATATAACATCTTAACGTAACACACCTATATTTTCCATTACTTTATATAACCCTCAATAAAATAGTTTATAAATCTACAC
>AT1G01520:35-165
CAAAAAACGGATGGTTCCTCAGGGTTAAATGAAGAAAGTACTTCACGAAGAGATGATATTGCTATGAGTGACACAGAAGAAGTATTAAGTTCCAGTTCTAGATGTGCTTCTCCTGAAGATTCCAGAAGTA
>AT1G01520:320-375
AGAACGAAAAACGGTGGCTGGTTCCTCGATACTTTGTCCAATGTATCCAAACGAG
>AT1G01520:425-490
CTCTCTCTTACTTTTCATTTATCTTGCTTACAATGCCAGATAGACCATTATAAATTGGTTTTGGT
>AT1G01520:1375-1500
AGCTATCTCGTAAATAAGATTGCTGGCTTACGATCGTATTCCACGTGGCAATTTATGTGCCGTGGATTTAAATTTGTACGTGGCATGAGTGTTAGGAGAATGTCCACATGGCTTGTAGTTGTTAG
>AT1G01680:25-100
TTGAAGCAGAACTCCATCTTCTCGAAAGACCACTTGAAGATCTAGAAGCGACCAACTGACTATCTTCTCGTTTAT
>AT1G01680:450-510
TCCTGGGAAGCGATAAATTAGTTGGTAATAGATCAAAAACAATGTCCACATACAGATCAC
>AT1G01680:915-1055
GGGAAGGGACGATTTTAGAGGCCCATAAAGCCCATTAGCTGTGTATAAATGGCCCATACTGAATGCAAACCCAATAATTTCTAGATGAAAGTGACAATGAAAACGATTTATACTGAATGCAACACAACATTAAAAAATGC
>AT1G01680:1175-1290
TTAAAATCATACTATTAGAACTAAAACCTGCAGTGAAGTCAACATTTATAAAAACAAACTTGATGTATACGTGTACACCAAAACATCTCCCGAAACCAATAATTTCCGACAATAT
>AT1G01680:1310-1405
AGTGTTAAGGAATTAATTAACACTAGTATTCCCGGAAACTTAATATACAAGTGTAAAGTTCAACTGCTCGGTCGAATTAAATAATATATGACCGA
>AT1G01720:285-375
TTCAGCTGGAATTTTAGTCTCTTTTTCTTTCTAGATGATGTAATAATAGATTGATCCTCTACATTATTCGTGGATCATTCTTGTGAAGAC
>AT1G01720:410-475
TGTGATGTCGTTTTTTGCATTTAGGTTTGTGTCATGCCATGCGTGTAGAATATTGTGATACTTGC
>AT1G01720:510-600
TTACGCTTAATTCTGAGGTGATGATACATATACAAGGCTTTTCCATTACAATAAATCATGTATTTTTGTGGCTTAGAATCGACAAGCATG
>AT1G01720:680-770
AGTGGCCACATTAGGTGACACTAAGATTTCATAGCATTGTAATATACACAAGTCTCTAGTGAACTGCTGTTGTGATAACCAACTCATCAG
>AT1G01720:1085-1150
GTATTTCTTTCTACTATATTAGTATCAACCAACATCTCTCGCATTTAGAATAAGAGTATACCATA
>AT1G01830:310-400
CTGCTTTTAATTTTGGGCCTTTAATTTATTAATTGGGCTTTAATAAGACTACTCGAAATTGGTAATTATTAGGCCTTCTTTTAATGAAAC
>AT1G01830:550-640
AAGGTTGAAAGGTTATGAATATATCTATGCCTTTATCTAATCATTTACATTTGCATGTGTACTTTTTATTTTCGTTTATCTTTATAATGA
>AT1G01830:675-745
GAAGACAAGAGTAGATTTTCGCATTTAATGTCCCATCTTAAAATAACGATGAGTAGTGTAAACAAGACAT
>AT1G01830:835-925
CTTGTTAACATAATTAAAAATGTTGTGGTCAAATACGACGAGAATAATGAATCATTTGTCATGTGAAGCAACATGTTCAAATAATTATAT
>AT1G01830:960-1070
TATTCCAGAAAAAAAGAAAGAAAAAAGAAACAATTTAATGAATTTATTAAATAGAGCAAATGGACGTAAAGAAGTGGGCCAAAGGCATAGATAGCTCACGCGACTCACAC
>AT1G01830:1150-1225
ATTCAGATTCAAAATTCTACACAACACGTGGCACAGTGGCCACGTAATGGGCCGGTAAAAAGAAATCTTGTGAGT
>AT1G02205:65-145
CTGGAGAAATGTACGTGCAAAAGTATCCGAAGTTGAAGATAAGACTAGTGGACGGGAGCAGCATGGCAGCTACGGTGGTT
>AT1G02205:235-325
AAGGGCGTCAAGGTTTGTGAATATATGAGGGAATTGGAATATATATACTCAGCTTCTCATATCAAACAAAAAATAATGTAGTAATGTGTA
>AT1G02370:380-455
ATGCTCTCATGTGTTTTCATTCATCAAACGATGCTTCTTTCACGTTAAGTGAAACTTTTTCTATAGTTTTTGGTA
>AT1G02370:505-595
ACAAAAAGCGAATACGTGAAGGGGAAAAAAACAACAAAAGCAATTATTTTTTATTGTAGAGAAAAAAACAAATAACGGCTTTTCACTAAA
>AT1G02370:745-880
GCAGTATTACCGAAAAAGACTGATTTCAATTTTTAATGCTTGAAGACTCATTCTTGCTATGGAAAATCTCATTATTTTATCTTGATGGAAGACTCATTCGTATTTTTTATTAATGTGGTGGAATCTACACAAAAA
>AT1G02370:1390-1480
ATATTCTGTCGATTAGTGACTAGTGTTTACATAATTATGAAATACGTGACTAAAAATAATATAGTTAAGAGAGACTACACAAAAGTACAC
>AT1G02380:805-875
AAACTATGACATTTCTCATAAAGACTTATGCAGCAGCAGAGAAGACTAGTCCTGATATGCGAGAGAGATT
>AT1G02380:905-995
GATCCAAGACTTGCTTAAAACAGTTTGTCCCTAAACTAAGTAATAAATGTGATTAGCACGTTATGTTTAAACTTGTGTCCCGTTTAGAGT
>AT1G02380:1120-1195
TCACTATTTTTAAAAATTGTCAACCAATAATATGTTTGTTTATCCAAATCCAATAACCGACTAATTTACTTGTAA
>AT1G02390:10-100
ATGGTATATAACAATATCAAACATTTCAAACCCTACACAAATAAATTCTACATGTAAAAGCCACAATTGTTCTACTAAATATAGAAAATT
>AT1G02390:180-245
ATTTTTGTCGTATATGATAATTATGGAAGTGTAATCAACACATTTTATAATGTCAAGATTAGCAA
>AT1G02390:410-505
GATGTTACGGTGGCAAGAGTCTTGATTGTGAGGCTTTTATTGGATATACGAAATATCAATTGAGAATTTGCATATTTGACTAGAGTTTCTAAATA
>AT1G02390:520-600
AAATGGAGAACTTTCGTCTTCAAGTTTGAAATGATTAATGAATTTAATTTTGTCATTAAGATCGAAACTTTAGTGTGAAC
>AT1G02390:725-775
TGAATAATACATTCTCTACGATTTTTAGACATTTCTTGTACAATACGGCC
>AT1G02390:955-1045
ACGTCCTCTAGCAACTGAATGGACTTCATTTATTAGAATCTAATTTAATGAAAGTATTTACAATTTTGAAATAACAACACTTTGTGTATT
>AT1G02390:1080-1295
TCATCTTATAAGAAAAATAACCAATCGAAGAGAAGAATTCGCAATATTAAACGGATCTCAGGCAGTATGATCTCTTAGTCAACTTTATCTTATATTTTATTTTTTCAAATCGATGAATGACGTTAATCAAGTGGCTCGATCTCTCAGCAGCCGAGTAATTGGAAATTGAACGTGCTAAAACTATAAGTCTACTACTATAAAAAGACTTGTATTTG
>AT1G02450:0-225
GTACATTCCCCTATTAAATAAATATGGTGCACTCTTATGTTATTAGCTAAAATGTTTAGATTATAATTCAGAGTCAACATGGAGGGACGAGTTTTTGAATCAACATTAATAAAAAAGTAAAATATAATTAATCCACCGTTTCAATATGGGTTAAATCATTAATTTTAAGACCACTAATATTAAACATATCAAATCATCCTAATTTAGAAAAAATTATATAAAACC
>AT1G02450:420-675
TTATATGGTGGATGTATTTGAATCAATATTTATAAAATTTTAAAATATTATTAATATGCTGTTTTAATAGGGGTCAAAACTTCAGTTTTTTTAACAATTGTCTCATGAATTCGTGGTATAGCGTTACTTAATAACAATTATAAACTGTAAAATATAAATATTTTATAAAAATAAAATTTGCAAGTTTTAATATATATTATTTTTAAAAATAAATCGTCCCGCGATATACCGCGGGTTAAAATCTAGTTTCTTTTT
>AT1G02450:750-855
CGTTGGAATCCAATTGTTCCACACAAATTTCACATATACAAATTAATTTAATTTACATACAAGTGGCCGACAATATGAGATTTTATTCGACAAATCTTTTATATA
>AT1G02450:845-920
CTTTTATATAACCTCATCATTCACAATTTAATAGTAAAATAGTACGTTAATATATCAACCTTTTCAAGCATTATG
>AT1G02450:1095-1145
GTATATCCAAGTAGATTAGTGTTGTATAGATTACGTCATCATTGTGACAT
>AT1G02820:160-250
ATGAAATACGGTACAGGTTTTATGTGATCAAATATCTCTTGATGTTGAACAAAGATTAATTGAACCGAGGCCGGTTCAATATTTGATATC
>AT1G02820:945-1000
TTAATTACACTTGGTCTATATTTTTCCTGCTTAGGACGGATCTTTATTAATTGTC
>AT1G02820:1150-1300
ATTTAGTTTAGGAGATCAAAAAATATCTAAATATATGCAATCACAATTATTTAGGAGATAAAAAAATATCTAAATATATCATTAATTTCTTTTGAGCATTATGAATACGTACATATGGTAATTTCATATATGAACATTTATATTTTCGGT
>AT1G02820:1330-1465
TTTTGGTCAAACTATAGTATACTTGTATATTAGATGAGTTAATTAATTTTAAATCCAGATAAGTAAAACAAGTTGTTAATTACATACAAAACGACTTTGAAAACAATTTTAATTATAAGTTACAACTAACTTTAA
>AT1G02920:10-65
CAATACTTACTTGGAACTCCAACTAAGAAACTCTTCGACGAGCGTCCACATGTGA
>AT1G02920:890-980
CGATTAGTCATCGACGACCTAGTAAACTTGTTATAACGAGGGTATATTATTACGTAACGATCAGTTGCTTATATTTGTTATATCTTATTA
>AT1G02930:210-280
ATCAATGTACTTTTCACATCTAAATATCTAACTCTGCTTCATGATTAATGGTTAGGTCTTAACTAGGGTT
>AT1G02930:630-715
GTTGTGAATGAAACCGAGGCGAAGCTAGAGAAGGTTCTAGATATATACGAAGAACGACTCAAAAATTCTAGCTTCTTGGCTAGTA
>AT1G02930:855-940
GCATGTGATGTGAAGGCTTGGTACCATAAGAAGAAGAATTAATCTTATAATCTTGTGATGTACTTTCGGTGATTTCTTTAAGTTT
>AT1G02930:980-1080
CTTTTTTTTGCCATAATGATTTCAAAATTCCAAAGAATAATATATACTTCAATATACATGTCACAAGATTAAATGTCAAAGTTGTTTATAATGAGCATTT
>AT1G02930:1130-1220
TACGAAATTATAGTTAGGATTTAGTAATGTATTTCTCCATAATTATGCTAAATTTAGTTAGTTACTTCAATATGATTAAATACTTTATTG
>AT1G02940:130-310
CTCATCAGTTTGATCCACCCGCATCGAAACTCACTTGGGAACAAGTCATTAAGCCTATCTACGGTCTAGAGACTGACCAAACAATCGTCAAAGAGAACGAGGCTATTCTAGAGAAAGTTCTAAATATCTACGAGAAACGACTCGAAGAATCTAGATTCTTGGCTTGTAATAGCTTTACTT
>AT1G02940:605-695
ATATATGTTTCATGTAAATAAATAAAGAACAAAAAAAGCATTATTTAAACTAATTAGATAAATTCAGATAAGATTCTACGATTATGAAAA
>AT1G02940:880-975
ATTGGATTGGTTTTGATAATATTTCAATTATTTTCAATTCAAATAATAATAATAAAACTGAAAATAATAAAATCCAGTTTCATTGAATATTTGGG
>AT1G02940:1010-1100
TATATTTGAAAATTTTAAATCCGAAAATTTAAAAGGTAAAAAAATTATTTTATTTACTTAAAAACCTTGCAAACGAAAATATTTTGTATA
>AT1G02940:1175-1245
GTGAAAAACAGTTAAACTTTATATACCTCAATTAGATAAGCTATTAAATCTATACCTCAATTTTTTTATT
>AT1G02940:1345-1465
AGAAATCTACAATTTCATGTAAAAAATCCAACTTATTAATTAACAAATTTTGAAAAGGAAATAAAGTAAATAATAATGGTTATGGATTCACCTTATCTAATTATAAATACATCTTTATAT
>AT1G03070:10-155
GGTTTGCTGAACGATTGCGAAACGTGATCCCCTCTTTGCAAAATTTAAACACTTTTTGGACCAAAACTTTTATGTCTTTTTAATAATAATACGAAACATATTTAAATTCATATTTAATTTATATATGAATTTCTTAAAAATATAA
>AT1G03070:210-260
GGTCGCGTATGTTAAACAAACAATAAACCTTATAGTACTGGTGGTAAATA
>AT1G03070:325-380
ATAGAACTTGGTCCGAATTCTGCTTCTAAAACAATTTTCCAACAATTATTATAGT
>AT1G03070:665-760
TATATTAAGATAATTTATTATCACACCTCAAACATTATTACTATTTAATAATTATCATAAATAAAGAAATATATATATGTTACTTTGTTAGTAGT
>AT1G03070:885-945
TGCTAACATATATTAAATTTTTGTTACATACTATATGTTAAGATATTTAATTTCAAACAC
>AT1G03070:975-1035
AATCCATAAGTAACAAAAAAAAAAATGAAAGGAGAAAAAAAGTATAAATACGGATAGAGG
>AT1G03090:315-575
GATTTTGTAATTTTAATACATTTTATTATCCGGAATAACAAAGTATTAAATCACGAAAGATGATTTAAAAAAAAAAAAAAAGTATTAAATACTAGTAATGATAAGGAGGCTGACAAGAGATAAGTGACAAAGACAGGGAGGTCTTGGACGGTGAGCTCTCGGTCCACTTTCGTCACCCTTTGTTTTTTTCTCCACGTTCGCTTTTAGATTCGACTTATTGCGATCTTGCGTGTCAAACTTTTTCCAATCATCTAAAAGTT
>AT1G03090:590-660
TTACGTTGTTCATAACTTTTATTTAAACTTTGCAAGAAAAAAGTATATACGATATATGGTGGCTTATCGT
>AT1G03090:660-780
TATGTATCATTTCATTCAGCTTTCTAAAATTTATAATTTAAAAAATAATATTATAATTAAGATTAAAAACGATAAATTCAAATTTAATTGACTGAGAATGTTTTTGGTGTTTGGTATGCA
>AT1G03090:795-885
AACTTATATATCATCCTTTATTTGTTACTCAAACGAAGATTCACGAAACGGACAAATAAACTATCCACCTATTGGGAACAAATAGGTTGT
>AT1G03090:885-1015
CTGACTTTTAAGCATCACAAACGGTTATATACTATTTTACATAAACGTTTCGAGTGTGTTAAGATTCATTTAATTGTAAACTAAATAATCAACAGCGTGACTTCAAATCAAATTGTCTTCTTATAAGTTT
>AT1G03130:700-790
CTGTTAGTTATCTCCATTTAGCTGAAGAAAAATAGGCTGGAATGTTGAATGCAGAAAAAGTTTCTCTCTTTCTGTCTTTGTCTTATAAGT
>AT1G03130:935-1025
TACCTTGCTGCAATGGACCACTACATCAAACTAGCTATCGGGAACGCGCCATGGCCTATTGGAGTGACTATGGTTGGTATTCACGAACGT
>AT1G03130:1090-1155
GTATCTTCAGTCAGTTAAAAGACTGATGACTTTCTGTCAAAGACGTTATCCAACTATGCCTTCTA
>AT1G03360:735-805
AGTGTTGAGATCTCCTTGAACAGCACGAATCTGAGCATCGAAACGACTATATGGTTTCGAACTGAAGCTA
>AT1G03360:855-940
ATTACCAGCGGCTAAAATCGCTTCCTTACCTTGAGCAATAATCTCAGCCGTACCTTTTAGCACCGTGTTCCCAAGCTCATCAATC
>AT1G03360:1305-1370
TGAAGGATTCGAATTAGCGTCAGAAATAGGAAGATCACAAAAGACTTGAAGCTTGTCGCTGCAGA
>AT1G03360:1380-1485
TTTTTTCCCATTTTTTTAATGAAGATAAATAATACTTTATTTGGCGTCAATTATCAGATTAATGGGCCAGAAGTTTTATAAATGGGCCAGAAGTTGGATATGTTA
>AT1G03850:15-95
TCCTGTGTTTCCCCGGACAATTGATGAAGTTGAATTTAAAACTCAATAATATTCATATGATCTGATCTATGCCAATAGTT
>AT1G03850:135-220
TCCGAATATAAGATCCGTACCAATCCTTTCATAAAACTTAAATATAAATATTTCTTGTTAGCTTGCTATTCAAATTTTCTTTTTT
>AT1G03850:580-640
TTTGAGCAATAAATAATTCCAAAAAAATAAAAGCGTTGTGGATTAACAAAAGACGGAACG
>AT1G03850:1060-1135
AAATTGATATCTTAATGTTAGAGAAAACAAGTCATCGTCATGACGTAATAGAGATGATCTAAAATCTAATGGTCC
>AT1G03850:1120-1220
AAAATCTAATGGTCCATACAAATGATTTGCCTTTATCCATAAAACGTAACCTTACGAAGACAATTTTAATTGTGACATAAGTTTCTAAACAAATAAAGAT
>AT1G03870:0-70
AGTTTAAAAGTTATTATTGTATCTAAATAAAAATTTAATCGATTTTTTTTGGGAGAACCCGGTTTTAATG
>AT1G03870:90-170
GTTTTTGTGTAAGAAAAAATTAAGGCTTGTAATAATGTAAGCATAAATAAAAGTAAAGCTTGTAAAAAATGTAAGAATCA
>AT1G03870:210-345
TACTGTATTAGAAAAGAACACTGATGAGAGTCTAGAGAGTAAACACGTGAGAACCACGTGATGATGTGGCGGACGCGACGAACCGACGTGACGAGTGTATGGCTGCATGCTGCTCGGATGCTTCCACTTGGATCC
>AT1G03870:720-855
GTCATGCATGCATTCTAGAACAAATGTATACACATTTTCTATGTTGAATTCATGTACGGGATTTCATGGTGTTGGTAATGAACCAATTAATTAGTTTATTGTCTTAAATATGCAATTGTTAGTGATAAGGCAATA
>AT1G03870:1030-1095
TATGTATATTGCGGATTACGTTAATTACATTATTTGTAAGTCATTTATGCTGTAAAGTTTTGTAT
>AT1G04280:135-195
AATGTGAGCCATTTAAATCTGATTCATATCAAAAAATTTTCGATTTAAAAAAAAAACCCT
>AT1G04280:1020-1090
CTCTATATGTGTTTACCTCGATGTTGAACTAAGCTTTTTTTTTAATATACAGATAGATCCTGTTTAAAAA
>AT1G04280:1365-1455
AGCAAAATTCAAATTAACATAGACACATGAATTCATTAATCAAATTTAATCAGTGTTCATGTATATTATCAAACTTTGTAGCTCTTATTT
>AT1G04310:90-185
ATGTAGACAGAAAAGGAAAGGAATCAGCACGTGTTCATCGCTCGACACGTGGCCAATAATAGCATTGGATTCAGAAAAAAAGAAAAAGAAAAAAG
>AT1G04310:210-325
AAATACAATCTGCACCAGCCGGGAATCGAACCCGGGTCTGTACCGTGGCAGGGTACTATTCTACCACTAGACCACTGGTTATTTATTTAAAAGATTTATATTGGTATAAAACCTT
>AT1G04310:470-525
TAGTTTATATATTACTTGTACTAAATTTCAATAGGGCAATCAAAATATACGGATT
>AT1G04310:810-900
TCATGTCTAATAAGTAGCAAGGTAGGTCAATATAACGTTTTACAAACGAAAAATAGCATTGCATATTTAATTATCTACCAAATATCTTAA
>AT1G04310:915-985
TAACTCATTATGTTATCAAATCAGCCGCAAATTGTGCCGTTTAAGTCAATACTATTTTTAACTTAGATAT
>AT1G04530:260-315
ACTCTGAATACGAATTTGTCGTTCCAAGTTGGGTTTGTTCCGCCATTATAGTCGA
>AT1G04530:385-450
AGCCAAGTCCTGAGCTGATATTATGTTAAGTTCTAGCAACTGAAACGATGGGAACATCATCGACA
>AT1G04530:605-665
TGTTTGATTGGTGGTGGCAATTTCCGAAAGGAGGGAGAAAGGTAATAATAACCATTTTGC
>AT1G04530:830-945
AATTGTTGTCTGGTTTTGCAGAAATAAGAATAACAAACAAGGTGAATAATTTTTAATACCATTAACATTTAGACTTTTTGAGTGTAAGGATTAAGCAAGTAACACGTGTTAGCTC
>AT1G04530:1150-1240
CATTTATTATGGGCTTCTTTTCATTTGAATGGACCAATGATTTGACAAGTTGTCCTCTTTTTGTATTATTGACTTGCCCCGGTCTAGACT
>AT1G04570:0-75
TATTTTATTTTTATTTTTTAAAGGATTTATAAATACTAAATTAATATGACGTTGTAAAATCTAACCGGATTTTGG
>AT1G04570:185-275
ACTCCTCTTTTATTTTTTTATTTTTGTAAAGGTTTTATAAATATTAAATTAATATGACGTTGTGAAATCTAACCGGATTTTGGATCCCGC
>AT1G04570:365-455
AACTCCTTATTTATTTTTTTAAAGGTTTTATAAATACTAAATTAATATGACGTTGTGAAATCTAACCGGATTTTGGATCCCGCCATTTAA
>AT1G04570:475-555
ACAAATCCAACATCTTTTTCACATCTTCATGTATATTTAACATTTATTTTTTTAATTTTTTTTTCTTAAAAGATTTTCAA
>AT1G04570:545-685
AGATTTTCAACTCTTTTTTCGTTTTTTAAAAGTTTTATAAATATTAAATTAATATGACGTTATGAATTCTAACCGAATTTTGGATCCTGCCATTTAACCGTGGTCATTAAGGATTTTATAAATCCAACATGTTTTTCACA
>AT1G04570:840-920
CAAAAACCGAAAACCGAAAAAAGAAGAGTAAATTATAAACATAATTAATTACCATTCCCCAAAAACCATTCCCAAAAAAA
>AT1G04570:920-995
CTAGCTACCATATTTTCATGAAAGTTAAATACAGACCAATCCCAATAATAAAAAATCTCTCGAAAGTGAAGTTTT
>AT1G04570:1010-1135
CTCAGATATTATTTGAAGTTTTGAACTATGGTAGATACTTATTTATAAATCAATTACATATAAAATTACCAAAAGCTAATAAATCGTAAGCCACATAATTCACGTAAGATTCCTGTCCGTCTCTG
>AT1G04770:55-110
GAAAACATTTAGCTACTAATTAGCTCAAAAGCCAACCGACTGAACGTCCATCATC
>AT1G04770:205-295
AGCCGTTTTGGTTTTGTATACATATGTATCTATCCATGTGTCTCTATCCATGTGTATCTATCCATGTGTCATTGTGTTTACTGAACGTAG
>AT1G04770:400-540
GTTATGCATTTGGGCCATAGATGGTACTAATAATAACAGCTAACAAAGTATGTTAAGGCGTGGCGTTGGAATGAATTATCATTATGATGTTTCCATTAGCCTATTTACACCTTTTTAAAATATACTCATTTTACACTGTT
>AT1G04770:705-860
AAATGTTATTTAAAATAAAACCAAGTCGTCTTGAGCGAAAAGTAAACGCGACACGTACGGTCACCTGATTAACACGTAGGCCCATCACTTTGCTTCAAAATGCACACTTAAATAAAACGAGATAATTGTTGTGATATATAACCTTCCCCCAACAA
>AT1G04770:900-965
TTAAGTGTTTAACACATAATTATGGAATTACTTGTAGGTTGTGACATATGCTGTTGATTTTTTTT
>AT1G04770:1020-1085
AGGGAAAATGTTAGAGAAATAATAAAAGCATAATAGATTTTACTAGTCAAAAAAATAAAATCAGA
>AT1G05570:210-300
ACAAACGTCAGAGAAACAGGAAAATGACGGGAGACCTTGTTAAACGAGAGAAACAAAACGTCAGCATGTTAGTTGAGCTCTGTCACCATA
>AT1G05570:340-430
AGCATCAATAATATTTTTTTCTATCTTAACCCATTTTTATTTATATTAAAACCGTGTAAGGAAATCGCCAGAAATTGCAGACCTGTTTCG
>AT1G05570:515-605
ATCCCAAAAAAAGAAAACAATTGACGTGGTGATAATAAGTGATCAATAATGTATGTAAACATATGAATGGTGAGAAACGTAAATGTTTAT
>AT1G05570:620-690
TAAGATACTTCTAGTTTAGAGTGGTCCACTACTGTCTCTTTAACAAAGGCATGATGAAAAAAAAGTTCCT
>AT1G05570:705-795
TTTGTTTAATTTTAGTATGACTCAAAAATTGAATTATTGACCAATAATCTATTTGATGGTTCGTTTTACTTTTATTATTTTTTGTTGAAA
>AT1G05870:0-50
TCCGTGTAAAATTGAACCGATCGTCCACTATGACTCACGGAATCTACAAC
>AT1G05870:90-180
TCGGACTCGTCTCACCATGTTGATTCTTCGAAATAACAACACAAGTACTCCATTCTTTCACATAAACATAATAATGTTAGTATTTATTTA
>AT1G05870:340-550
CCTCCCAGCCTCACACCACGTACGAGTGCAAATTGTGCAAAATCAATTATACGCTTTTTATAAGAAAACATAAAAGGGGTCTCTTTTTGTTAATTAATAATTATATATGGTGACTTGTAAACTGAATAATGGTGATACTACTAGTAAGCACCGATAAGAAATACGAACATCTTTAATAATGTGGTCATTTCCAAATAAAATGATTCGAAT
>AT1G05870:645-755
GAATACCTAAAAGTTGATTATGTGTCTGATTTCAAGCATACGAAATATTAGTGTTGTTAGTTTATCCAGAATAAACAAATAAATATATATGCCTTGCATGGCAATCTTTG
>AT1G05870:750-870
CTTTGGTAAAAAACCCAACATATATAACAAAGAAAATAAGCAATATTATTCTTCTAAGAACATTTCATTTATAAATATGCATGGAAAAGGGAAATAATGTATAAAAATGTGGTCATATGT
>AT1G05870:895-1025
GGTGACCATATATAATGTAGATGAATAATTGTGAGGTGAAGAAGAATAATGATGGTGACTTTGTAATCTTCTCCTCCCACTTAAATTATTGAGCGACAACGTGGCTTTTTGTTGGCCCATATTCATTCGT
>AT1G05870:1010-1095
CCCATATTCATTCGTATCTCCCATCTCTCCACTCCTTATCCACCACGTGTCCCCAGCTGCAAGACCAACTGTGTATATCTTTGTC
>AT1G05870:1140-1230
AATTATCATCTACAGTTTATGACAGTTCTATGATTATATCTGTTATAACATCATATCATCATATACATGCAGTCCCCTGTGACTATAGAT
>AT1G06030:1070-1135
ATATAATTTGAATTAAATTTAAGAGTGTTGTGTTCATCAACTATCCAAATGTTTTAATTGCCATG
>AT1G06030:1190-1280
TTTTAAAATTTCTTGTTTCAAAAGGTAGTCCATACATTAATTATTAAGAATTTTATCAACTACAATTATGGAAAAAATGATATTCAGATA
>AT1G06080:90-225
TTCCCAACGATTTATGAATATCGCTACAACGTAATAAAACCGCGTCATGGTTAATTTGTTCCTAGTGACGAAATATCGCTACAACGTAATAATTAAAACCGCGTCATAGTTTGTTCCTAGTGAGTAAAAATGTTT
>AT1G06080:430-525
AAAATCTCATTAACCGATTCTTCCTTATTAATTCAAGAAAGATATATTAATCAATATACATGTTCTTCCATCTCGTCCTTATTTTTGGAGATTAG
>AT1G06080:510-590
ATTTTTGGAGATTAGATAGTTGCTAAGTGAGAATACGTGAATTAATATCTTCTAACTTCAAGAAAGAGTGGTTTTCTTCT
>AT1G06080:660-870
ATTACACTAATTAATTTCATTCGAACTCATATAAGTTTCGTTCATTAATTTATTAGAGATATAGGAGTCCTGATGTTGCTTGGTCCACCACATACACAATATAGTATTAAGAAAAAAATTATTATTGACATAAAACAACATATAGAAAAATTCAAACTTTTTCTAACAAGAAGCTAACAAGATACATGGTTGAGATATCTTGATTAAAAA
>AT1G06080:910-990
TTTAGAAAGTGAATCTGTTTTGAAATGGTAAATTATATTCATTAATTACTTTAACATGTTATATCGAAGACGAAATGAGT
>AT1G06080:1110-1200
TTGTATTCTCTAGATTGTCACCAATAAGCCTAATTAACGGTAACAAAGAAACCGTACGTGTTCATATAACGGCATATAGAAGGCTATTCA
>AT1G06080:1200-1275
AAAACAGAAATGACAAAATCAAAGCTATAAATATGGATGTACATATACATTGAATTAGCATCCATAAAATAAAAA
>AT1G06180:95-170
GCAAGGTAGCGGATTTTTTGTGAAGAATATTAGCTGGGTCCCACGTGACACAAAAGCTATGCGGAAAAGGGTGTT
>AT1G06180:460-540
TTTGGGCCTCAACAAGAAGTAGGCGTTTTAACACGTTTCGTCATCTAGAGCCAGATGAGAGGGCCTAAACCCTACCTGTG
>AT1G06180:785-855
GTGGCGATGGCGATGCCTACACAGCCGTGAAGCCGAGTCATCGATTATAAAATGAGATGTGTCGATGATA
>AT1G06180:850-930
TGATAACATTGCTAGTATAATTCTTGGTGTGGTCCATTATTTGATAAATTTATGGTATGCGTCCCTCATGGGAAGTGTGA
>AT1G06180:1040-1130
TAAAAATATGTGGCTGTTACTCGTACACATTTATGGTTATATAAATGAATAGTCTCAATCACAGCCGTGCTCTGTAGTTGTCAGGTATTC
>AT1G06360:110-260
AAAAAAAAAAAAAAAACTAGTTTATAGTTTGTTACGTTGAATATTATAAGTTTAATCGATATTATCGGATCTGTAGAACGCTAAGCATTATGAATGCCGTAAAACGAATCTTTTTATATAGATGCGCATTCAATTATTTTTCAATGCGGT
>AT1G06360:330-390
CAACAACATTGTTTTCTAGATTCCATCATGGTTACTACACTAATAAAACGAGTGACGAGA
>AT1G06360:585-660
AAGAATACTTGTGGTTCTACTTTTTCGTGTCTCCAATCTCTAATATTACTATACTATATATAGAAGCTTTAAAGA
>AT1G06360:785-845
TTTGATTCCGATATATATACGACCTTTTTTATTTTAACTTTTAACATTTAACTACAAAAT
>AT1G06720:190-240
TCAATATTAGAAACAAGATCTCTAAACAAGAAAGCCATATCTTTCTAGAC
>AT1G06720:425-500
CACATAAACCAGCTCTACCATCCATAGATATTATCAAGTTTTGGCGTGGCAAAAAGCAGTACCTGCAAAACCCAT
>AT1G06720:725-805
CCCAGTATTTCTATAAGCAAAACAGGGAACATATACTTCACTATTAACATCAACAGACTCAACAATACTTTAACCTTAAT
>AT1G06720:875-965
AATCCGAACTAAGGCAGAACAAATTATACATACAATGTTCGAAATTATCACCATTGAAACACTAAGAAGCAGTTAAAGTCAAGATTTAGA
>AT1G07000:260-380
TCAACATTCATTGTCTCGTGGTTCCCATTAACCTTTAAAATGTGACAAGAAGTTACTCTTTGTTAGTCCTATCAATTATCATCATTCTAGAACTAGCAAATTAAAATGTGTAGAGTGCAA
>AT1G07000:615-705
AACCTCAAGATGCGTAATGTTGAACTCTAGCAGATACTGTCAATAATATCATCAAGCAAACCATTTAACACGATACTGAACCACTAAGAG
>AT1G07000:825-915
GTGCATATCCAAAACCAAAACCTACTCAATTTTGTTGTCAAATTATCAAAAAGATTGAAACTTTTCAGATTAATGGTGGCGAACCTGCAA
>AT1G07040:10-80
GTTTTGGGTTTTGGGAGAATAAGCCGACGGATTATGAAGACAAAGACTTGGGTCTGAAGCTGAATCTGAA
>AT1G07040:180-270
CTTTCTTGTTGTGCAAGTTATGAGTAGTGATTAATCTTGATTAGTCAATATTAATGATTTAGAGTGTATGCAGAGGGGAGAAGTGCCAGT
>AT1G07040:430-500
TCTACACTCTAGCCTTTACTCATTTAGTTTCATGACACCAATTAATATTGTGAGGCCTAACTTTATATTT
>AT1G07040:510-570
GGAAATCTTTTGAATTATTTGTAGGGTCGGTTCGTGAAAAGAGAGACTTAAAAGGGGCAA
>AT1G07040:905-1000
TAAATTTTTATAAAATTACGTCATTAGCATAAGAATGTATGTACATATTAATGACTATTATAAACCCTAAGGCACGGATACCTTATCCTTCCACC
>AT1G07040:1330-1410
ATCATATAGTAGCCCACTAGGAAACCTTACACCAAAACGCCCAAATAATATGAAAAGCCCATCATATTGTCCATCCAAAG
>AT1G07050:440-515
AAAATAGCAAAAGGTTAATCAATTTGTATTATTAAACAACTCTATAAATTTGAAAATCAAAATGTTATTTTCAAA
>AT1G07050:1010-1060
TATAAATATCTAACAGATTTTTCACTCCATCTAATGTGTCGAATAACAAA
>AT1G07135:425-485
AGATCCAAAATGTATATTAACAGTATTCATAAAATTCTTCAGTTATAACGAACTGTTCAC
>AT1G07135:505-795
CTATACTGTGCTAAAATTACCAAAGCATGATTTATATAAATCATATCCAGTAAGACCATATGTGAATGAATAACAATGGATTATGCTTAGGTTAAGATTTTATTAAATTTATAACACTTTTAAAATAAATTTGGAATAATACAAACATATAAACCATTCCTATAACACCATATTTAAACATAACAATGAATTGCTTGGATTTCAAACTTTATTAAATTTGGATTTTAAATTTTAATTTGATTGAATTATACCCCCTTAATTGGATAAATTCAAATATGTCAACTTTTTTT
>AT1G07135:940-1045
AAAATCGCAATAAATTGGTTTGAGTTCTAACTTTAAACACATTAATATTTGTGTGCTATTTAAAAAATAATTTACAAAAAAAAAAACAAATTGACAGAAAATATC
>AT1G07135:1155-1260
GGTCCACTTTTCTTTGCTCTATAACCCAAAATTGACCCTGACAGTCAACTTGTACACGCGGCCAAACCTTTTTATAATCATGCTATTTATTTCCTTCATTTTTAT
>AT1G07350:185-275
TTTAGTTCTCTTTGTAATGTATTAGTACTTTTGCATTTATTCTTGTTGAAGAGTTTGTTTTAACTGTTTCTCATTTTCTTTTACACGTTT
>AT1G07350:1380-1460
TATTTTTTTTTGAGAATTCTACTAGTAATTTGGATAAATGCAAATAATCTGGGAAATACAATTGGGCCTTTTGTGAGAAG
>AT1G07400:1385-1475
ATCTCATAATATTTGGGCCTCAGGAGCCCATTATAGCCCATAAAACGCATAACGGCTGAATAGAGTCGTACTGTACTTGAAATTGAAAGG
>AT1G07430:30-85
TTAACGGTTAACAATATAACTCCTCATTCCAAGACAATTACGTGTCCTCTGTACG
>AT1G07430:265-410
GACAGATTTGGACTTAAATTCATGATTGTATTTGTAATCTTATATACGTTATAGTTAAATTTCTTTCTCTCCGTACGTACTCTAACTATAATTATTATTAAATGCTGAACGCAATGCTTTTGAGTGCTGAGAATCTTTTTGGTCT
>AT1G07430:455-520
TGCAACGAATCAATGTATTAATTTATAGGAGATCCGGATAAAATTATGGATATATGCACGCTACT
>AT1G07430:900-950
CGTACGTGTCTTAGTGTAACCTAATTTTAGTTCACAGTATATAAATTCTT
>AT1G07430:1020-1100
ATTTAGATCAAATTAAGGTTAACTACAATAAAAATTTAACTAACGTAATGGGATTCTTTAAAATTAAAAAATCGTTGATT
>AT1G07430:1140-1220
TGGACAAAAAAGGTCTTCCTGAGAAAGAAGTGGACCACAATCGTGGCGCGAAAGGAACTTCCTCCTCCCCTCTGTTGCCT
>AT1G07620:40-130
CAGATCGAGCGTGGGCTTACGCGTGAACTCCAATAGCAAATAAAGACTTGCTTATAAACTTAGCTGCGGAAAACTAGGAAAGGCTAATTA
>AT1G07620:150-235
ATATAGATCTTATTATGGGCTAAGACAAAAAAAACTCTATTAAAAGTCAAAAGAGTGTGCCACAAATTCTCATTTGTTTTCGTTT
>AT1G07620:245-335
CGTTGGATCTCGTGTAAGGATCAAATGGGCTATGAGCCTACCACGTGTCATATTATCACTGAAGGCCTCGTTTTCTTCAATCTCTCGACA
>AT1G07620:380-515
CCTCATTCATATTATAAAATTTGGACTTTTATTCTTTTGTTAACAATGTGTTAATGGGGGGGTTTTCTAGTTCATTTTTATGAGTTTGGTGGCAATATTCATTTACTTTGGTTGGGGCAGTTGTGATCATTACTA
>AT1G07620:590-690
AGGAACATACTGCTTATTAGAATATCAGAAAAGTAACAATCTAATATACATATAAATCGTTTGGTAGCGGCCACTTGCTAACGAAATGATATAAATCTTC
>AT1G07620:740-890
CTAGTCGGTTAAATATGAAGCGTGATTAGGGTTTTAATCTTCCAAGTCAACCTTAGCTTCCAAGTCAATTCTGGCTTGCATAGTACTATTTATATATAACTAGATATACAACATTCTGTTATCATTTGACAGAATTAATATTTACAGAAA
>AT1G07620:920-1010
CCATACAAAGAGTGTCAACAATTTGCCACAAACACAAGTAGCCTAACAACTAACGTAACTACTCATCCCTCTTGGGTTGTTCACATACTT
>AT1G07620:1185-1490
AATCATTAATCATATAAAGAAACAAAGCGGATGGAGTACTTAAATTATTCAATATTTACAACAGAACATTATTTTAAATAATAAATCTATGAAATCTACCTTATAAACGTGCACTAACAAAAGAAATGATACGTACGTATATTCGTAGCAATAAATATAAGGGAAACTATTTTATTAAATTCTGAATTACAAGTTGAAAAGTACTAGATATTGAATTTAGTTTAGAAAAATACAAGTGTTTCAATGAGGAAAAAACAAATTATTCATGTATATTTCTCGTGGCGTGTGAGCGTTATATATATAGA
>AT1G08450:805-895
GTTCTCCGGGTGCTTCTCCAATACGTCGAGGAATCCAGGGTCGTATCCAGTGTCGAAGACGCCTTCTACGGCGTCGTGTCGGAGCATTCC
>AT1G08450:960-1085
AGCCGTCGTCGGAGGCCAACGGTGGTGTAATAATGGAGGATGCTCACGCGCAACACACGTGTTCTCTAACCATTGAGATAACAAGGGGTATAAATGTCTTTTCCAAATAAACTCAAGGATTAAGT
>AT1G08460:285-355
TAAGAACTAAAATAGAAATCCTAATTATAACCAATTAAAGATTTAATTTTCTTCAAGATAACTTCAAATA
>AT1G08460:355-480
TCGAAAGGCAGTAGACTTGCGAACTCCATGTCTTAGTCCACATAACAAAAGAGCTGAAGATCTACACACAAGTGGCAGCTAACAAGAACATATCAAAGAACTAAAACACTGCAACATAACAAAGA
>AT1G08460:730-785
AACCTATAAATAGAAAGCCAAAATCCAGAACCATAGAATCGTTATATTAACCAGA
>AT1G08460:1335-1425
AAATAATAATTGCTATGTTTCTTGCTCTAATCTCTTATATTGCCATTATGATTTATAACAAATCTTGTTCTAACTAAATCTAGCCGAATG
>AT1G08610:345-420
ACTGGAATTAAATCTACAGGTCCATCCATATACGTTGGGTATGTGACAATTAAATCTGTGAAGAATGAACAAAAA
>AT1G08610:540-620
TTTTTTGCTCTGTATGATATATGTCTTGCTTGGTTATAAGTTATTAACGCTTCAAAAGCAAGCAGATGCAATTTCCTATG
>AT1G08610:635-705
CTATTTTGTTTCGACCATCAAATAAATAAAAATGCAATAAACAAGTGCGTTAGAGAGGAGTAATATAATT
>AT1G08610:695-875
TAATATAATTGGTTCACTTTGTTGGGTCATATAACACGTAAACATTTATTCACGGGTGGACATTACCGCATATCCACACAACAACAGAGTTATTTAAAGGATTTGTATTTACGCCTGCTAATTTGGTTACAAATATACGCTAAATAACAATTTCATTTCTTTAAAATAAAATTTTATTGT
>AT1G08610:1050-1140
TGTAATAAATATTGTAGTATGTGAGTATGATATGCAATGATAGCGTCAACTAATTTGGTATACACAATTTATAATACTTAATTCTGTTTT
>AT1G08610:1145-1235
AACATATCTAAATTTTGAATATGATAATGCAATTATTTAGACATTATAATGTGTAAGAGAGGCGTGTATAAATGACTATTCATCTTGTTT
>AT1G08650:70-140
GTCAGCATCAGACTGTGGATTACCAGCCGCAGACGAAGCAGCACGTATCACAATCCTGCTCTGTAACACC
>AT1G08930:0-65
GTAAGTGATACATCAAGGATATTAAGTTATTAACACGATGACAAAAAAAAAAAAAAAAAAGTTAT
>AT1G08930:610-665
AGAAGAAACATTTAGGTATCTCATGATTTGCTTAACTTTCTTAGATTAATGTTTC
>AT1G08930:845-980
GTATAGAACAGTTTTGCAAATATAAATTACTGGTTAGATATATATACGTATAGTCAAATATGGCGGGATATTAATCACTTTAATATTCATTTAGATACTAATAAATGGATCAACTTCATAGGTGTGGATCCTTGG
>AT1G08930:985-1240
CATGCATGGAGAATAGTCAAATTCAAATATATCAATTCAGAAAAACGAAGGGTGGTCGACCAAGAGCGACTTTTCAAACCATCAAATAATTGATAAGGACGATAAATTTTATTTCTTTCAAGTTAATATAATACATATATAAATAAACATATCAATTTATATTTGGCTCGAAAATAGTCATATTTAATTTTAAATAAAATAATTGAAGATAACAACTATACACACATATATTCGTAAACGTAAAAGCAAAGATGA
>AT1G09070:40-145
ACAAATTTCAAATTTAAAATATTTTGATATGTTGTCAAAGAATTATATATAAATATATTAATATTGCAATTTTATTAAAGTAAACTTACCAATTGATGAAACACA
>AT1G09070:225-315
TTTCGGATAGTTTCATAGAAAGAATTATTTGGTTCTAATGTAAATTATGTTCATTTCGTATTTGCTAATGGTAATTAACATTAATGACTA
>AT1G09070:355-430
ATTGTGTTCATTTTGTAGTTACTGAAAATAACGATGAGCAACTGAACGTGATTCAAAATACTCAACGCTAAAATT
>AT1G09070:710-815
TTCCGTGAAGGAGAATAAAGTGGCAAAGAATATGGATAGTGCGTCAGGACCACGCGACGTGAGGCTATCGTTGAATTAAAAGGATGATTCGATCGAGAAAATGAG
>AT1G09070:820-895
ATCGCCTTCGAGAATAAGCAAAAATAGAAAACGTATGGGTTATTCCACGCGTATTGCTCTTGACTACTGAAGAAG
>AT1G09070:1010-1140
AAGACAACTAATCTTCAACTAATTACCATCATATATACCACCATTAGTTGGTTTTGTTAAACTGTAATTCAATGTAAATTTATTAAAACATTTTCATTTAGAGTTTACGGTAAACTTTCGAATGGTAAAG
>AT1G09250:0-70
AACAGGACAAGTGTATCTTGTAATACGGAAGATTTCGAAAATTTGAACTCCCGATTTCAACATAACAAAA
>AT1G09250:95-185
GGCCCAGTAAGTCTAACGATAAATGAGCCTTAATGGACTAGATTTAAAACTTTATAAAGGGGCCAAGGCGTTCACAAACCCAACAGTAGG
>AT1G09250:465-600
ATTTTAGAATCTAAAAAATATACACGCACAAGAAAAGCTTACGACCACATATATCAATGGGTTCCAGTTTAAAAATTTGGTGAGTATTATTAAGAGAGTCGGAGAAGAAATATTTGAGCGTGGTTAAAATATTAA
>AT1G09250:695-785
TCTTCTTTTTTTTTTTCTTGTTTTTTTTGGTATAAATCACACATTTACTACAAAAATGCACTTATAATATTTAGTGTCAACTCATAATTG
>AT1G09250:875-950
TTAGATCATGGTTTGTTTAAGATTTAGAACTTGGTGTAGGAACTAATAATTCCCTCGTGATATATGACAAATTGA
>AT1G09390:0-50
TTATATATACATGCACATACATATATTTATTTATATACATACATATATAT
>AT1G09390:95-160
GAAGTTTGCTTGTAACACTTGGACTCTCTTTAGGGCATAAGAACACGAAACAATAGGTGATATGA
>AT1G09390:365-425
GTTTCTGTGATATTAAACCAAGGGCTTGGTTTATCGCTTGATTAACAATATCGAATTAGT
>AT1G09390:595-800
ATATAAATATAACTAGGTAAGTATCCGCAAAATGTATGCATCTAATTATTTCTAAAATTTAATATATAATTAAATTCATGATTATATTATTACATGTTTCAGTTCGACTGCATACTGTATATATACTATATATTTTTAATGTATGAACTAGGTAATCATTTACACAATGGGTTGGACATACGTAATTTAAGAATATCTTTGAAAA
>AT1G09390:965-1055
AAGAAAATCTCATATACAAAACAACATATATTGTTGGGCCAATTATTGGTCTTAAAAGGCCTCATTTATTCTTAAAAGGCCTTTCCTTAG
>AT1G09390:1200-1370
GCTGGATATCAGTGGTTAATTTTTATACGAAATGCTTTTGGAGTTGAAGATGAATAAATTATGAGTAATGCTCCATTTGCATAAGTCAAACAAGCTAGCGTTGGCGTCCAGATGATTAATTTCCGCGTCCTCTTTGGCTTCCAAGTTCCAACGTAAATTTTCGCCGCATA
>AT1G09570:1240-1290
AAAACGATATGGATTTTGTTTGACGAAAAAAAAATAAAACCTTAATAACG
>AT1G09932:55-140
GATTTCTCTCAGGCAAAGAGCTTTTTTCACTCTTCATATAAATAAATTATACATGAAGCTTCCTCAACATATGTAAGGATACACG
>AT1G09932:255-345
TTCATGAAATGGTAACCCTTATAAATTTTGACTTCGTGAAGTATAAATAACATTAGCATATATCTTGTTAGAAAAATACATTAATTTTGC
>AT1G09932:575-665
GTCGTGATTGTAGACAAAGGGTTAGTGTGATCTTCATTTACTTAATTATGATTATAGTCATTTCTTGACCATTAGCGTCGTTAATACTTT
>AT1G09932:1000-1120
ACTTCGGGCAAGCTCCGTATATTATATACGATCAAATTAAAAGACTTGATATGCAATCTACAAAAAAAAAAAACGAGAAAAAGCTACTTCAAGCTTACAGATTTTTTTTTAAATATATTT
>AT1G10340:300-370
TTATAGATGCTTTAACCGGTCTCACCATTAGCGTAACGACTCTAGACGGGAGGAGCCTAACTATCCCGGT
>AT1G10340:615-735
GAGTGTACATACATTTACGTTTTTCCTTTGTAAACTTGTGTTATAAGAAAAACAAGAAAACCCAAATCGAATAAGACTGGATATGCGGGATCTAATAATGGCTGCCACACACAGAACATA
>AT1G10340:1175-1250
CTATGGGCCAGTTGACTCTTGAGTTGATATATCCATTGCCTTCGAATTATCCAGAGTTTTTATTTTTAGTCCTAG
>AT1G10340:1310-1380
CACAATTTTGCTAATGAAATGTAATTATTTTCTTGTGGAAAAACTAAATAATTGCGCGTGAAAGAAAGAG
>AT1G10340:1440-1490
AGTCAACGAATATAAAAGTTTCAAGATTACAATGAGTGATAGAATAAATA
>AT1G10370:100-190
TCAATAATTCTCAACTTTAATTTGTTTTTAATTCATTGTATAATAATGTAAATCTGTAATTATAACTAGTGAATATATAATGCATCTTGC
>AT1G10370:280-415
TGTTTATTTAAAATGTTGACACAAAAGAAAAGACGCTTCTCTTATAAAAATAAGAAAGAAAAAATAATTAAAAGAGATGCGACCGGCAAATAAATTCTGCAATGAGACAAAATAATTGATTCTATTTTTGTTTTG
>AT1G10370:860-950
TGTATTTTTTCCCGCTAGGGGCCGACATGTAATCCATTTGTACATTTAAATGATAGCCGTACTTATACCATTTTATTAATGTTAAGAAAA
>AT1G10370:1080-1165
TTTTTAGGTGGATTTGTGTTTGTCTTCCCTGATATGTAATTATCATTTAGTGGTTTCACTTCTTTGGTTTTATATCACTTGATTA
>AT1G10370:1195-1290
CATCGTTACTCGTTAAAACAAAGATATTAACTTATAGTACTAATAATATATACAAATTTCTTAAACATGAAATACAAATTTAAACAAGCTAAGTG
>AT1G10370:1310-1415
GTTTCAATTGTTGCCACGCATATAAAGAAATGCCGTCTCGTCGACCACAATAAAGACTAATAACGTTTTCCCACCCGTTTAATACACGTGTCAACCTATAATTGG
>AT1G10522:750-815
CCCGGAAGATCATTCAATAAATAGTCTTTTTTCATAGGTCTATCCAAGGGATATCTATTCGTTTG
>AT1G10740:0-85
ATATTACTTTACCAAAATGGTGTATATATATCCTCTATATACCATATATAATTAATTAAGGAAACAAAAATATGACTTTTATATT
>AT1G10740:155-245
TCTGGTAGATTATGAAAGAGTCAACAGTAATAACTTTTCAAAGTAAATACTCTTGTTCCTTGCCAATTAGAGTAGTCAACGTCTCTGGAT
>AT1G10740:290-390
ATTTATTAAATACCCTTAAATGATTGTGGCCAGTAGCTAAAATATTAAAAACGTTATTTATTTAGACCCATTAGTTTTATTATTTCGGTCTTGGAATCGG
>AT1G10740:685-805
ATTTGGTAATTTAAATTTGGAAGTTCCAGTTAGCAACTACTATATTATAAATTTATAAAAAAAAACCTCGGAAATATTAAGCAGTCCATGTGCACGAGTTCCCCCACTAATTAATTCCAC
>AT1G10760:145-270
GTCAAGTCGCGGAGTCGCGTATGATCAATATCTGCTCTCACACCGCGTATCCATCTTTGTGCCGACCTCTGGTGAAACGTGTCACGAGCCCTAGAAAAGCCACGCACCGAACCATCCAAGCTTTG
>AT1G10760:295-450
CCGAAACAGCTAGGTTCAAAAACGGTAACCAAGCGGTCAGCACGTGTTACGAGACATTGGGCGACGCGGTTTACAATTTGGCAAGCGCGAGAAAGAGCATAAGGAAACGTGATGTGCCGGCGATGAACACGTATCTAACTGCGGCTGTGTCTGAT
>AT1G10760:550-640
TGTCTACATTGATTAGATGATCGATTTAAGAGAACAATTGATTTAATTTTTCTCAAAACAAAAACTAATTAATTGAAGAAATAAAAAATC
>AT1G10760:715-805
TATGTAACGCCACTGGGTGTAACTAATTATATTTGAATTTCGTGTAATTAATAATCGCTAGTAGATTTTTTCATATTCAACAATTTGCCG
>AT1G10760:1020-1195
TTTTACTTTTCCCAGGATCCATAACAAAAAAATATCTTTGAGAAAATAATTTGGCTATATCATATATTGGATAAAAATATTGCCATTTAAAATGGTCTTTTAACTCTTTTTCTTAAAATCTGTATGTATATTATAGTTTGATATGATCATAAAAGCATTCAATAATTTTTCTTTC
>AT1G10760:1300-1370
TAAACACACATAACATTATACAAAATTATCCTTTGCTTCTATATTTAACATACATTTTGTTTTCCACAAT
>AT1G10970:180-245
TACTGGAAACTTGCTTTATCCAGTGGATTTTCAGATCCTTGTCGAAAACGCTTAAGAAGCTCAAG
>AT1G10970:315-405
ATGTTTCTAACATATCACTTGTAAATATATCTTTCTTGTTAATTGTTGAAAGTTGCAGAAAAGCCATTTATAAAGATCCATTTCTTCTTA
>AT1G10970:990-1065
ATCTCTCCACTGCAGAAACCGGTATGAACGCAACAAAGGCTGAATACGAGAGGAGTGAAAGGAAGACCCTGCTGG
>AT1G10970:1335-1395
TTTTCTGTTTCATATTAAGTTAAATCATTCTGTTTCCACTGAAATAAATTGTTTTCCAAA
>AT1G11260:165-495
ATATGAATCTGTCCTATAAATTTTGAACCTATCCTAATACCACGGACTTATATATGTGAACGTTAACAACACTTTCAAACTCAAAAAGAAGATATATGGATAAGCATTCCACGTAACCGTACATTGTTATGTTCTTTTCTAGATAAACAAAATCTTTGCGTGGTCGAAATTGAAAAATAAATCTTTATATCTGTAAAGAAAATTTCGATGTCACTTTATAAGAAAAACCAATGCTGCATCCCATGAAACAAATTAATTCCAAGAACATTATCCAAAACGAATTTAATGTTATCCAAATAGATCAAGAAAATTAGTTGGACCGTCGAATGA
>AT1G11260:635-750
AGTATTTGTTTTTGCATGATATATGACGTTAATTTGAACTGATATTAGTCAATTTATGGGTACAAAAGTTGAAAGTTTAGAGCACTATGTTGGATTTATTAAAAATGATATCATA
>AT1G11260:835-925
TGAGTTTCTAGTACCTAATTAGGAATTTTGAGGATATACGATACATTAATGAGTTACATTATCCCGAAAACAAAATCTTGAAAACGAACA
>AT1G11260:960-1025
TGGAATTGGATAGAGCCGTTGAACCATCAAGTGGGTCTTCAAGTCAACGAACTGAATTTGATTTT
>AT1G11260:1055-1245
CACACACTACTAACACCTCTGGTGTCCACTTTTTTCTTTCTCTAGATTGATGTGTTAAGATTTTTGTTGCAATTCATTTATTCAGGTATTTTTATATATATATATATATAAATTAGAATAAACTAATTTAAAGAAAGATATAGCAATTATGTTTCACATTTTAACATTCTCAATCATTTATAAAACTAAT
>AT1G11700:40-220
AGTTTTATTAAAGATGGACTACTTTGCTACTCTATTCTCCTATATTATTTTCAAAATATTGGATCAAAAGATGGAAAAAAAACGAAAAATAAGATGTATACATTTTTAAAACAAAACGTAGCTGGTGCTATGTTTACGAAGTATGTACGATACTCTTCTGTCTCTTATTCTCAGCCGTTC
>AT1G11700:255-315
ACTAAGTTCGTCACAAGTGTCAAGTGGAAAACCTACTTTAAATTATTAATTAAAAGTTAT
>AT1G11700:350-440
CCAATCAACAAATCAGTTAATTATGGTTTTGGTGTTGTGAAATATACTCGAGTTCTTTTGGGTTCCACTTTGGATTTAAATACTGACGTA
>AT1G11700:465-545
AAGTTTATACTCTTTGTTACAACAAAACAGATATATACCTTTAACAATTACTTTTTTACTTTTTCAGTTAACCATTTTTA
>AT1G11700:620-680
CTGGCCACGTCACGTATTGTATATTGTGGTTGTGATCACCATATTTAAAAATGGCGAAAT
>AT1G11700:685-835
TAAAATATTGAATGAAGATAAAATTAGTTATTAATATTTTTAACGTAATGTAAACATTAACATAAATTATACATAGATTTATTTTCTACAACATATGGATATATATTACTATACGATTATGACACTATTACAAATCCATAAATTGGTATC
>AT1G11700:1040-1140
TTATCAGACTGGCCTCGAGTGATTCACACGCGCATCTCGGTAGCGCGTCACGTGGCATGTCTCGTCTTATTACAGCGTATCCAAATTGTTTATCTGTTAA
>AT1G11790:45-200
CAAATGTGGACATCAAAATATTTTTTTTCATAAATAGAGATGATAACAATATTGGAGATAATTATTTTGAACCTTTTTCATTCACCATTTATCAAGAAATTAATTACATATACCATAGTCTATAACAAATTTCCAAATTTACCACAAAACTTTTC
>AT1G11790:245-335
TTTGAAACAATTGTGAAAGGACTCCATTTACTTTACAACAAAATAAATAGGGAAATTTGCAAAATTGATTAACAAAATAACTATAATTAA
>AT1G11790:435-490
TTACAACCATTACCCTTGCAACCGTCGTCATCATCGCATCCACCATTATTTCCAC
>AT1G11790:505-650
ATCACCATCACCACTGCAATCGTCACCACCATAGAAACAACCATTACGCTGTCATCTCTACCACCATCACCATTATTGCGGCCGCAATTGACACACGACCACTGCAACCACCAACACAAATATTACTACGACCTACACCATACAC
>AT1G11790:1225-1350
GATCAATATCTGATTCACAATCCATTACCTTTAGAACATATGGAATATTACCTTTAGATCAATATCTGATCAACAAAACGAAGAAGATGATGAGTCATGGCAAATTGGAAAATAGGGAAATAATA
>AT1G11840:20-140
GAATATTTTCTTTCATCCATAAATTTTGTAAAAAACCAAATTAAATAAAGTTGAATTGCTTGTACACAAAAAGACTCTGTCTAAAATAATAGTTCTTCAAACAATTAAGATAAAATAAAA
>AT1G11840:200-310
TGGTGTTGACCACATGTAATAAAAGTGGACAATTGAAAGCATATAACAATGGCCTTTAGTTGAATTATACTATTATATTATGTAGGTGTTTTCTCTATGTATTTATTTTC
>AT1G11840:455-540
AATACAAGAAAAAAAATAAAAATAGATGTCTCAAGAAAACGTAACAAGTAATATTGTTAGCCTGAATCTTTTTGCACCGACTAAA
>AT1G11840:525-605
TTTGCACCGACTAAACTGTTTAAAGGGAACTTATATACAAAGAAATTATGTTAGACAAAATGAATACATTTTCTCTTTTT
>AT1G11840:900-1030
TATATAAATAAAATAAACAGATTTTCATTACGGAAAACAAAATAACAATGAACCGTGACACTTTTTCGTCTGTTTATAGGAATTATTAAATCTACAGTTATATATATTGAAATTATACAAAGGGTTTGAT
>AT1G11960:860-950
CAAACCTCGATCGATTATCAAAAACGATGAATAACACTACCACGTAGTCGGTTATAATGTTCGGCGGTTAAATCATCAGAAGGAATGCCT
>AT1G12090:25-115
CGCATATACGCATCTGTCAATATTTGTATTGATATTTTTTCTGAATATTATACGTTTTAGAATGTACGTAAATTTATATTTAGAGGTGAC
>AT1G12090:190-245
TTTTCATATATATTATTCTATCATTTTTTTGTCAATTACATTATAAGCTGGGACC
>AT1G12090:285-350
TATATGTAAAACATTATTAATCTATAGTAATTTTTTTACTTAAATTTAATTCTGAACTCACTGAA
>AT1G12090:460-530
AATATGCACTGAGTAGAAAAATAAATTCAAAACATTGAGAAAATAAATAGTGGTTTATGTGCATATATAT
>AT1G12090:650-815
CTAATTTATATGACTAATCAACATTTTTTGTATGTATTAAGGTATAAATGTACATCGTATTTTTCTAAGGACATGATATTATTAAATACATAGTTACGAAATTGTGAGTGTATTAAGGTATAAATTTACATCATATTTTTTCCTGATTTTGGTTACGCGCAGTAC
>AT1G12090:855-970
TTCCTTTTTGGTGGCAAAGTCACTCTATACTGTGTTGATCATCTCACACGTAGGTTGTGCTTATATTAGACTTAAGGTTCTTTGGTGTAAATATTTGAAAGAAATTAAAAATTAG
>AT1G12090:1000-1380
CAAAGACTTCATTTTAAAAATTAGAAAGTCTAATTAAGAACTTATAAATCGCAAATTTTCTGTATCTATATAACTTATACAACTGTGACATGAAAATCAAACTTATTATAAAGCTAGCAGTCGTAACTCATAACAAAAAAAAGAACATATGCATCTAGCTAGTTATTTGCACAAAACAATAATAATAATAATAATAATAATAATAATAATAATAATAATAATAATAATAATAATAATAATAATAATAATAATAATAATAATAATAATAATAATAATAATAATAATAATAATAATAATAATAATAATAATAATAATAATAATAATAATAATAATAATAATAATAATACATACATACATACATACATCTATACTAGTTGAGG
>AT1G12780:190-240
TCTCGTGGAGGTATAAGATTCATTTGTTTTGTGTTAGTTAATATACTCTA
>AT1G12780:815-885
GTAAGATACTAAGATCACAATTCTTATAAAATCCGTAACGTCGTAAGACTTATCTATCTTATTCTTGGCC
>AT1G12780:900-960
GGTACCACTCAAAGACTTTTCGTAGTCCTTTGCTATGGCTACAAGACTACAATACATACA
>AT1G12780:1100-1235
AAGACTTTTTTTGATGTTTGCAGTAACACCAAACTGCATCGTGAAAACGTTTGGTAGATTGATTGATAAGTTTGAGGGTTAAGCACAATAAATGACCACACTTGTTTTTCTTTTGGTTGATAGTTACGGGTTTTT
>AT1G13340:370-460
GTTTAGTTGGCGGTTTCACATTATTATCACGTGCATGCAACTATACAAGTATATCAGAGTTTGAGAGGACTTGTGTATAATTACGAAAGA
>AT1G13340:500-605
CAAAATATTTATAATCTGTTTGGTTCACCTCTGATGAGTGGGAGAATTATGTCTAGAGAAACGATTGCATTGGTAAATAAACAAGGTCTTTCCATTTTTTTCGTA
>AT1G13340:625-685
CTCTTCAACATAATAACAAGATTTTTGTTACTAATGTTTTTGACGTGGAAAGTTGCGTGC
>AT1G13340:755-845
CTAATGGCTGCTTTAATAATTCATCTAAACCTGTCATTCTTAAATTAATTGCAATAGTAAGAGCCGTAACAATGACATTTCTCGCAAGTC
>AT1G13340:1005-1055
AATTATGGGTCCATGGTTCACATTATACAAATTACAAACTTTAAAGACTG
>AT1G13340:1070-1150
ACCTGAATCTTACATGCATTTTCATGTTTTAAGACTAGACTGGTACAAGTTATGGCCGGTTCAGATGTGGATACTGGTAC
>AT1G13360:0-80
AAGGAAGGGTTAAATGCAAAAGAATCAGCTTAAATAAAAGCGTGTATGATACATAGAAAAACAGTCAGATGCATGTAGAA
>AT1G13360:120-200
TTGTCAAATTGACACGATATATTGAATGATTCAAAACGTATTAGCATTTATGATTGACACGATTATTTTCCTCACAAATT
>AT1G13360:215-305
ATCATTTGGATCCTATGATCATTCTACAAGTTTCTAAGTAAAAATAATTTGGCTACTCCCTTAAAGAAAAGAGAAAACGTTAGTGCGATG
>AT1G13360:525-615
ATACATAAATGTATTACCCAAGAATCACAACTTTGCTTAAACCACGTATATTGGCAACACTAAGATGCCTATTGTCCACCAATTAAAACA
>AT1G13430:315-405
GATGCGCTTAAAGTACCGTTGAAAGAGTCTCCTTGCAAGATCGTGTACGTGTGCAGGAACGTGAAAGACGTATTGGTATCACTTTGGTGT
>AT1G13430:1170-1230
TAATGAGACTTTTAGTTGAACGGAAAAGCCACAAAACTAACTCAATTATCATAAAAACCA
>AT1G13430:1285-1495
GTGAAGTGTCCATGTTTACGATATATACAATGGACTAGATTCCTATATACTAGTATTTTTTAATTTCTTAGTGACATGATTGGTTAATATTTGTTAGAAAAAAGTCGAAGATTATAACATTATTTTGTTCTATGTATATAAGGTCAATAATGGAGCGTAATTTTATATTAGTAAAATGCTGCATTTAAGTTTAGCACTTTAAAATCAACT
>AT1G13470:575-710
AATCTTCCTTGAAAATTGCTGATAACGTGTTGTGATTCTATACGAATTTAAAAGTTTTCACATACGAGTTTAGACATGTTTCTAAGTTGAAGAGAAAGTGAGATTGAGATCTTATCCAACTTTCAATTGTTTAGG
>AT1G13470:985-1045
GTAAGAAAACTATCTAGACTGGGCTTTATAGGTGAGATTTTACATTTAATATGTGAGCCC
>AT1G13470:1210-1430
GGCCCATAAAATTATAGAGCCACCCCTGATGACGTAGGCAAGTCAACGTAAGTATTACTTCTTAATAACTTGGAATCAATTGCTGATAACTTGCTTTTTAATTCTAGGGACCACTTAAATTGAGTGACAGAATTTCAAAACAATGTGAGGTACATAGAAACTGCCATAACAAAAAGACTTCCGTAAAAGCCAAGTCAAGATCTTAGAAAAGTCTCTTTTT
>AT1G13608:110-180
TACTTTTCTAATGTTATTATAATTTAAACATCAATGTATGCTCATTAATTAAACCTTTAATATTTTAAGA
>AT1G13608:245-395
TTACTATTTTGAAAATTATTCAATCCAGTTAACTTTTAAAATTTAAAATTACATTTCTTATTTATCTTTACTCAAATTAATTAATTTCGAATTTAGGATAAATTTAATTGTCAATATTAAGTATACTAAAAACACACACAAAGTTTTTAG
>AT1G13608:420-580
TAATCAAATTAACTTTTTCCAAATGATATTTAATAAAAAAATATTAAACTAATTAAGAACAATGAATACTTTAGCGTGTATAAATACCAAAAGCCCATCATCACAAACCAATAAATCATTTACATCCGCTAGTTTAAATTCATTAGACAGAGTCATTTTC
>AT1G13608:720-810
GTTTTGATTAATTAACTATTTTTTTAATTTGTTTCGCAGTTACGAATTCTTTGGATGAACCTAATATGGACACTATATCCAAATCCAGAG
>AT1G13608:1050-1105
AATGAAATATTATACGTCAACGAAATTTAGTATATAAACTACAAAACGGCAAAAA
>AT1G13608:1170-1235
AGATTTTTCATTAACCACGTAACCGACACTTTCTTCTTTTGGGATAAATCTATTTTTTTTTAAAA
>AT1G13608:1235-1350
GCCATAGATTCTTAGGACACCTTATTTTAATGAATTATCTAAATTTAATCGGACATTACAAACGTAACATATACTTACATATGCGTTATTTAATGAAAACATTGACAAAAGTAAA
>AT1G13608:1380-1445
CAGAATGCTCTATATATATACCTATTATTGTAGTCTTCCAATATTATTACATCGCAAACTAAGCT
>AT1G13990:215-265
CACGTGTTGCAGATGCCTATTGTGAGCAAATTGCAATTGAAGTCAGCCGT
>AT1G13990:380-460
TATCCTTTGTTATGTCTGAAGGAACTCACCTGTATCCAGCCAATTATGTACTCTGTGTTGATGCTGCAAGACAGTTTGCT
>AT1G13990:770-830
CGGTTTTGGATGACTTACTTGAGATAGCTGCTGGGTCACAGAAAGACTACCGAAACATGG
>AT1G14200:545-595
AAACCGCGTAACCAACAAAGCAAACTCTGATTAAATGCTGCTTACGCGGC
>AT1G14205:355-435
AACCAATTTTATTGAATTCGAAATTGATTTCAGTAAACGAAAACGAAACTATACAAAACATTCTAGCAAACCTAAACCTA
>AT1G14205:645-725
GAAACTTATGTTTACAAGGCATCTCCGCCGCCACGTCACCTTTAGACCACTCATCCAAACAAATCGCGCAAGAACCACCA
>AT1G14205:1230-1330
AAAAGAAAGTTGCAGAAGACTCTAGAACCATTGACGACGCTTAAGACTTTCCATTTATTTTTAGTTTCTTTTAAAAACAATTTAGTATTTATTATTTAAA
>AT1G14205:1365-1450
TAGATAATTACGCTGTGAGAAATTTTGCATAAAGGTACGAACATTTATAATTTTATTTACAAAGTTCCAGTTTTTTTGGAGTGTT
>AT1G14250:445-505
ATTGTTTGAACATTAATGTCTTATATATTTTCCTGTATGAAATTAATCTGAATCAGTTCT
>AT1G14250:600-670
ACAACTGATGAAGAATATTTGCGTGGCTATTGTTTCTCAGCAGCATATACTATATCAATGCTTCATGATA
>AT1G14520:770-825
TTTGATGATATATTATGGACATTGGCTTGTTGTCAGTTCATACGAAGTAGTTTTT
>AT1G14520:870-960
ACCGGTCTTTTCCACTTGGTTAATTGAAAGTTAGGTGATATCTGCACGTACTAATTTCGGTTATTATTAATTAATTACAATCGGTATTTT
>AT1G14520:1110-1165
AATATGAATTTAAATTAGAGACAACAGAAACCGTGAATCTCGACTTAAAATTGTG
>AT1G14520:1265-1355
CACCATCGGATCATAGAAAACAAAATTGTCATTTATGAAGCCACGTCATGTAGATCCCACTATAAAAGTGACGTGATTTCTTCTTCTTCT
>AT1G14700:0-75
CCTAAAAAGGCCTATATTTGTTCTATTTATAAAGCCTTAAATTAAAGACTCAAGCAATATCACATGGATCTAATA
>AT1G14700:125-175
GTGGTTGAATGATTTAGGCTTTACATCAAACCCACTGTTTCAATAATTTT
>AT1G14700:400-450
GGACCACCAGAGATATTCAGTGAAGTTTCTATAGTCATCATAAGTCAATC
>AT1G14700:645-735
ATACAAACACACAGGTGACAAGTTTTGGCCAAGAATTACAAAATAATATGATACCTTCATAGTCATACCTCAGAATTAATGTCCTAGTCG
>AT1G14700:790-910
GCCCAATAACATAGGCCAACCCATTTGCATTTATTTTCTCATATCCAGTAAGGATATACTTTCAAATTTTTGTATAAATGGGATTTTGATTTTTCTTTAATATGTTGAACGAATTTAGTA
>AT1G14880:95-155
TTTCGACGATTAATTTAATCAAACTACATATCAATGTAATTTCCACGTCAGAACGAATCG
>AT1G14880:170-255
GCCTGAATGCTATGGACGACTTCACCAAATTGTCCCAGTCAACACGAAAAAGCAAAGAGGACTAATGAGCTAACATGTAATATAT
>AT1G14880:260-400
ATGTTTAAGATACAGACCAAAGATGGCCTATAACATTAATGAACGTTATAAGACGACTTTTAATAAAACTGAAAATAATATCCTCCTTATATATATTATCACTAGGCATTTACATTTTAAAAATTTATTTTCCTTTTGTG
>AT1G14880:520-585
TTCTTCATTTTCAATAAACTTGGAATTGTATAGATCTTTTCAACGTTAAGAACTTCATGACTACA
>AT1G14880:785-875
GTTTTAATATAAAAACTAATTTATCAGGGTGGAGCAGAAACGTTGAACGCCAAAATGACGGCGTTGCAATGATTAGATAAATTTTAATAT
>AT1G14880:895-975
CTATAATTTGCAAAATGATTGGCGCGCGGGACGTGGAACCCTTATAATTAAACTAAGAATCAAAATGTCTTTCGAAAAGA
>AT1G14880:1020-1165
CATCTTTCTGTAGGATTTGGTCATCGCTCGTCACTCGTCGCTCGTCACTCGTCGCTCGTCACTCGTCGCTTGTCACTCGTCGCTCGTCACTCGTCGCTCGTCACTCGTCTCTGTAATTAAAGATACAATTGTCCATTTAATTTTC
>AT1G14980:20-70
AATTTAAAGGTTTTTGTTTGTAGATGATTTTCCATAATGTATATTATTTT
>AT1G15002:355-575
TGGAAAATTACCTTAATTTCGACATAAAATAACAAAGATAGTTTCTAGATAAAATAACAAAGATATTTACGGATCATACTACGTGAACGGCGTCCAAAAGCCAAAGAGCTAGATCAAGGATGCGAAAAGCAAAAACGGCGGAGGAGACGGGAACGCTGACGAGGAGAAGAAGACACGTTCCAAACGCGACGCTGGGACGAGAGTTCATGAGAAAAGTTTG
>AT1G15002:675-765
ATCTTCATCTCATGGATTCGTTTCCTAAGGACCACCATGTTCTCGTCCACCGTTCTTCCTCCTCTGTAGTAGTCTGCACACACGGTGGTG
>AT1G15002:875-965
CACAATTGGTGGGATTATTTATAAGTTATATTTGGATAATATTTAATAAAAACGGCTAAGGCTGCTTTAGCGCGTTACCTTATCGTAATA
>AT1G15002:1135-1375
TGTCAATCCCATTAACGTACTATCCTCATAATTTATCAACCAATAATTATATGTACATTGACCTCTCCTTTGTTTACATCCAAAAAACGTACGAATCAATCCATATGATTAATTAAGGAATCATGGGGTACTCTCATACTTAACATTAATTTAAGAAATAATGGTGAAGTGATGTCTATTTTTTTTGTTTGTTCTAACAATGGTGAGGTCAAACGATGGACATAGATTATACACAGTAGC
>AT1G15440:140-245
AAAGACTGATCATGCATTGTTGTTTTCAGGGTCTTGGAGGGAGCACACGCGTCGTTCGTGGAGAAAGTTCCTTACAAGTCAATGGCTGCGTTCACACTGTTGCAG
>AT1G15440:1075-1165
TATGTAACGTAACCTTCCAAGAAAAGGTACTAAATTTCAAAAAAGTCAATGTGTTCCTCATAATTTCAATCTATGAGTCAATAATCACTT
>AT1G15440:1260-1410
TTTGATGTTCTCTGCAAAATTCGCATGTATAAAATTAATTAAACGTTTAGAAATATAATAGATGAACTTTATAGTACAAAGGATCCGTGGCGCAATGGTAGCGCGTCTGACTCCAGATCAGAAGGTTGCGTGTTCGATTCACGTCGGGTT
>AT1G15510:230-285
ACCTTGTTGAAGTCACATGGAAATCAAAGCTTAAAGCTCAGGTTAACAAAACCCC
>AT1G15510:1175-1265
GTTTTGGTCAGGAGTAATATTTTGATAGTGAGAAGACTAAAATTAATCATTTAGTTATATGTTTTTTTGGTTGTTATTGTTCTCTTGATG
>AT1G15510:1390-1460
GAGACACTGCAATTAAGGCCAAAACGACGTAGTTTTTTGAAGTTGAAGATGATCCGTTAGTTAAGAAGAA
>AT1G15870:120-195
ATCAGAATCTTGATGCTTGCTTGGTAATTATCCATCAACACTTTTATTAATGTTTTTCTTCCTTCTTTACCAGAG
>AT1G15870:1370-1445
AACCAATGATTTCGAATTAGCTTGTAAACACGTTGTTACCAAATTTATAACCATCAGATTCATTCTGAAATGGAC
>AT1G16030:425-505
GTGCACCCAAAGAAACAGCTCCCAAAGCATTTATAAGAGCACCTATTAAACAAATCAAAACACAGGTATAGATATAGTAG
>AT1G16030:735-825
TGAGAAAATCATGAATACAGAGTCAAAACACACAAGACCAAAATAATACTATATGAAAAGAAACGATTTTTTTGAGCATTAAGAGTGTAA
>AT1G16350:55-225
TATAGGCAATAGTTAAAACCCTGAACTCTGTATATAAATGATAAATTCAAACAGTAAATGAAAATTTGATAGCTAAAAAAGAGTTGAAGAAAAGCATATGTTAGAATCTTGCCTGTCGACATAAGAACGCCGGTATCTGAATTATATCTGCAACCTTGCCAACTGCTTCA
>AT1G16350:540-590
AGACGTAAGAATTTATAGATATAAGATCGCTTTGACATCAATATACTCCT
>AT1G16350:885-950
ACATTTTTCCCCCTTGTCAATTATTTTAATAGTTCCAACACAGTTGAACACAAGATGTCACAACA
>AT1G16350:1235-1285
CAGATAACAAAACCTCAACTTCCAAAATCAGAATCTAAAATTCACGAAAG
>AT1G16720:105-215
TAACGGGATCATTCAGTATTTGCCTTTTCTTTCAACAAGTAAAAACGTAAAATTGAAAGTAAAAACGACATTTTTGGATATATTAGAACCGGGGCATAACATATGGCAAA
>AT1G16720:360-450
GAGCTGCAGAAGTCGCTGGAACCTCGGGTTGATTAATTTTTGTAAATACTAATTTCATTTAGGATCTAAGCAGAAGTGGAAATGTAATCT
>AT1G16720:520-630
TGAATAACAGCAGCTAGTGAAGACATGAAACAGCCATATAACGATTTAATTTAGATGGATTCCTATTTAACAGTCGCAAGTCGTGGAGTGATGATGATGAATAACTTGAG
>AT1G16720:865-955
AGCTTATATCCCTTTGGGGGATGTGGCAGGAATGTAATATATATACATATAAATAGATAACTTGCTAGATAAGTAAGAAAGATGAAGTGT
>AT1G16720:1000-1090
GTATTAACATTTTAGTATCGTTTCATTGAATTAGGTTTTGGATTAATAAGGTAAACGTTATCACGACACTGCTACCTTTTCTAAATTTGT
>AT1G16720:1270-1360
CAGCTTCCTTAACGCTTGAAATATACAGATATGAAATTTTATGGAATTATTATATAGTTGGAACTTGGAATGAAATTTTCTTGTTTGTTT
>AT1G17380:560-625
TTGCTCTAATCTTGCTTCATTTAGTCCCATCAACAACACTTATTAAACTAAGTCACATCTAAACT
>AT1G17380:795-950
TTCCTTTTTTCTTTCTATAGGAAAGTGGGAAAAACGCGATTCACACGATACTGTTGCTAGTGCGTCGTACAGATTGCGATACGTGTCACAATCTTGACGGTCTGTTCTATTTAAACCACGTGTTTTAATCAAAAAACTTCTGTCGGATCGTATCG
>AT1G17380:1150-1250
GGAAGGGCAAATTTTGTAAATACGATCAAATTTCGAGTCTTTTACGAATTTGTGACATACGCCGTTTAATAACGTTTGCCGTCGGTTCTGAAATCTTTAT
>AT1G17380:1240-1320
AAATCTTTATTCTTTTTCTCTTTTATCGTTACGCGTAAGGAAAACGTGCGGTAAATTCTAACCGAAAATATATATAAAAA
>AT1G17420:215-280
AGAATCTTTTGGTAAGATTAATTAAGAAGTTGTAGCATTTTCATAAATAATAAAGGGTTTATTTG
>AT1G17420:305-360
CAAGTACATTTATGTCACATCTATTTCCGGTTAGTTTAATTTTATTAATTTCGTC
>AT1G17420:440-495
GTTGTCGAATTATTTATTTACTTTCTCGGGGCCTTTGTTACTTTATAATTAGAAA
>AT1G17420:590-670
CGGAGTTTCTCCTTTGATTCCTCGCCCCTATACTACGCGTCGTGTCAGACTCGTAACTCCGTTTGACTCAATTACCCCAC
>AT1G17870:780-860
ACTTTCTTGTTTCTTCTTCATTTCATCTTCTCTGATTAATGTAAACGTGTTGCTTCCTGCAGAATTGCAAGATATCCTTC
>AT1G17870:1165-1215
GACCACATCCAAAAAAAAACCGCACTTTGATTTTTACATATCTTTATAAT
>AT1G17870:1245-1320
TCCGACCAGAATCTTGTTTTCCATCTAATGACTTAAGGTTTTTATCCAATTATTTGATGTCTTATTGATTCTTTG
>AT1G18300:195-270
AACACTATGGTACGTATATATGTATATATCCAAATTTTAATTAAATAACCTTTAGAATTTTATTGGAACTATTCG
>AT1G18300:415-625
TTCTCATCCATCATAAAATTTTCATATCCAAGCAAGCTTTTACCATTTATCAAAAAAGGATATAAAAGGTAAGCTTTTACCATTTAAAATTTTTAAACATTAAAACTTTAGAAAATACTTTATAAACATAGACATAAAAAAAATTGATAATAAATGTTCTATTAATCCTGATTATAACCATCTTTATGAGAATAAGAAGTAAACTTTTAG
>AT1G18300:740-890
GTAGTGTAATGGCCCATGGCCCATTTATAAGTTTTTTCAGCAGTAACAACAACGTTTGGGCTTCTAGAAGAAAGCAACAAAATGTGACTATGTGAGTCGTTTTATATTAGTTGAGATAAATGTTGATAAAAAAAGAAAAGAAATAAAAAG
>AT1G18300:890-1045
GCATCGCCTAATACCGTGTTTGCGTCAGGGACGAGTTTGTGGATGACCACACTCTCTTACTACTAAACTAACAAAAACACTTGCTCAGCTTCTTCACGCACCGTTGATGCGCGTATCTCACACCATTCCTGCATTTTCTTCTCCGTGTCTGTGCC
>AT1G18300:1140-1310
TCTAGAAGATAAACAAAATACTCGTGTTTATTTTGATAAGTGGGAATACGTAAACTGCTCATTTAATAGTGTAACATATTAAAGGCTTTTGTGTCGATTTTGATTGTTTATTTGGTTATTACCATTAGTGAAACCAAAATTTGGAATCCATTAGGAAGAGTTGTCTCATT
>AT1G18300:1365-1450
AACCGAGAACTCAATTACAATAACCGGGAAAGTTGAGTCAATAAATATGTATACTTTCGATTTAGCAAGTTGATTAGATAAAAAA
>AT1G18330:415-535
CTGTTGCTTGAATCTGACAGACCACAGAGGGGTGTGATAAGATGCATTTAGAAAACAGACGAATCCGATGAAGACTTGGTTCCTCCAATGACTTGGTTCACACCAGAGGCAGATACAGAA
>AT1G18330:655-745
CTTAACCTTACGGGGAGATTGTGCAGTTATATACTAGGACTAGGACTTAGTAGAGTGAGAACAATTGTTGAATTTGGTTTTGATATAATG
>AT1G18330:1090-1180
ACCATGTGATGCGACTTGATTTGCCCATTATCCCAACCATTTTATAATCTTTTGTCATGAACTTTTCTTTCATACAGTTTTATAAGACTA
>AT1G18330:1230-1295
GTATCAAATCATCTAATTAATCAAGTGATTTTTTTAACTCAAGAATAATGTATTTTTCCCTTTAC
>AT1G18570:235-295
CTTTCATATCATATTAGAGAGAAAAAAAAACACAATGTTGACTAATTAATGGGTTCTGTC
>AT1G18570:405-480
GTTTGAGTGACCAAGTTGTTGCTTTAATTTAATCTAGTTCAAATACGACTACTTTTGTGTTGTACCTCTCTACCT
>AT1G18570:520-575
TTGTTTCTTTATAATTTTGTCGTCTCTATGATTGTTTAAGCATATTTAAATATTT
>AT1G18570:615-685
GTCCTCGCACTCCAAGTTTTAAAGTTGAATTCATTCTGTCATGGAAACGTACCTTTGTGGTTTTTCATTT
>AT1G18570:765-855
GCTTTTTTTTTACTCGTTATAAAATTAAAAACTTGCTGAGAAATTATAGTTTCATATATACTTTGGACCGACGGTCAATACCAAAAAACT
>AT1G18570:925-1015
GATTTTAATTTAATTGGTGTTCCGGACCTGCCGGCGCCGTATTATAATTCTTCAATAAATTTTATATTTTGGATTGCATAATCAAAACTA
>AT1G18620:325-415
CCATCAGCAACCCTCTGGGTGTTAACATAACCACAGTGGCAGTGGCACCACACGAAACAGAAACCTCTGTTGTTACTTCTGATGCCAAGA
>AT1G18620:605-695
GCGTCTTTAGAATCTAGAAATGCGATTACGATAGATGATAGGGCTAACAAGACCGGACTTGGAGAGTCATAGCTACAAAAACAAAGGTGG
>AT1G18620:1205-1310
TTCTAGAGCTAGATTAGAATTTGGTCGATCATTCAGTAGGAAACATAAATTTTGGAGATAACGTAGAAGAAAAGTCAAACTAGTCCTAGTTGGCAATCCAACTAC
>AT1G18740:50-125
ATTTATTATTTTTAAGTATAAAAAATTTAGTCAATTGGGGCTAAATTAATTGGTCGTATAGACTGGAAAGTGAGT
>AT1G18740:305-360
TAAACCACACGTGTGGTTTATTGTTTTTGTTTTCTTTTCAAATTTAAGTTTAATT
>AT1G18740:530-645
GATGACTTGTTAATGACACATATTTACCATATTCCATTATAATTATTTTTTTTCATTATACAGTTTCATAATAATACATTTCAATTTTCGGTTACCAAAAAACACCATTACACAT
>AT1G18740:765-840
CCTTCTTCAAACCTCGATCTATCTGATTAATAATGAGCGTAATAAAACGATTTTCTCAAATGAATCTAGTACCAT
>AT1G19000:125-265
AGACATTGAACTTGTAATCTCTTATTTAATTTGCAAAAAACAATATTTAACCAACTGATCAACAACGGTCATTTAATCGTACAATATAATTCTTATAAAATATCATGTTTATTTGCGAACATATAAAGTCAACCCCGATC
>AT1G19000:995-1085
CCAGATTCGTTTAACACTAACATTACATTATAAAACACACTTATAATACCATCTTATACAGTTTAATTATGAACTACCATTCAAAAATCA
>AT1G19050:845-1010
GTCCACTAAACAGAGTGCCTTTATTGCATACAAAATTCAATCAATTTAATAAAGGAAACTCAACTGAAAACGATGACAATAAAAAATAAAAAATGTCCCTTTTGTCTTTAAATAAAATAATAACCCTTACTGACGTAAAGAAAATTAAATTAAGATAACCTTGTA
>AT1G19050:1055-1205
AGAGGATTAAATTGTATTAGTATCACCATCATACCATTACACATAAATAAAATTTAGTAGAGTATAAACGAATCACGTGTATAGGAAAATACAAAATACAATGTTGAAGTTAAAATGAATATAGAAGTAGATTAATTGAGCAATAACCAC
>AT1G19180:100-175
TCTAATCTTGCACCAATAAAGTTTCTGTCAATTATGTAAAAGAAAGACTCGTTGTATCAGTATGGGACGACTTTT
>AT1G19180:175-330
TCTTCTGAATTGTGTCGATCGAGTCCATATTATAATACTTTGTCACGTACTTTGTTTACTGATTAATTTAATATAATTGTGTCGCATTATCCAAGTCTAATTAAACATTAATGTGTATATTATACACCAAGTTACAATTACAGATCTATCTCTTA
>AT1G19180:590-705
AGAGCCCTGGATACTGAAATACAAGAATCTCTCCACGCGTAGAAAAACGAACCAACCATGATAAAACACGTGTCATATCGAATAGGTACAGACAACGTGCACTTGCCAACCTTCT
>AT1G19180:720-820
TTCTTCTTTGCTTCTTTTTTTCGTTAAATATTGATATTGTTCAAAAAACGCATAACAACAAAAACGTGGTCGACGGAACATGTGGGTGGTGGAGTTGTCT
>AT1G19180:995-1060
CAAGCATTACTTTCGTTACGTGTAATCTTTTGATTATTCAATCAAATTATCATATGGTTCATGGC
>AT1G19180:1175-1335
TTTCTAGATATTAGACAATTCTTAGCTTGTCTCTCTGCATGAATCACGCGTTAATATACTTATAATAGTAAGTTTTAAAATGTTTCGAGTATAATATCATATTAGATTTCAATTATAATTGTAAGATTATTTAGTCTCAATGAAGAGCATTTAAAAATGT
>AT1G19180:1415-1470
AATTAGAAATATTAAGTACTTTTTAGACGTGTTTAGGTTGATTAATTTCTTGTTA
>AT1G19250:70-130
GGGATAAAGATTTAGTCAAAAGTAAACTAGAGACAAAAAATAAAATAAATAAATAGAGAT
>AT1G19250:150-255
AACCTGACAGAAATAACAGATTAAGAATAGACCAATAATGATTAATTAAAATACATTTATAAAGTCTATCCACCAAAGACCATATAAAGATTATACTTTTTTTCG
>AT1G19250:585-635
TTAATTATTTTTTTAAGGATGTGTCTTATGTACATTGTAAAAATTATGAT
>AT1G19250:670-835
ATTTCCTTTATTGATTAAAAACAATAATTATATTGTTCTTTCAAGACTTAAACGTTAGAAAGCTCTCGGAAAAACAAACATTTTCCCGTGTATTAAGCTGTACGTATATGATGTTATAATTATCTCAAGAAAGCATACATATTGATTGTAAATAAAAAGAGTAGA
>AT1G19250:1050-1160
TCATTCTTATAATATTCTCAAATGATATTCGAGAGTACATTTTAAATAGGAAGGAGATTTCGATAACGATATTAATGGAACCAAGAATTTGTTTTAAACCTATTTTTGAT
>AT1G19330:330-420
CGTGTAGGATTATTCTCATTAACCCCTCGAATTTTCATAATTGACCACAATTAGTCACCTAATTTTGAAATGTAACAAGTAACCCCTAAT
>AT1G19330:430-500
TCCTCTGAAAATTTCCCGGTAATTAATGGATTTTGTTCCAGCCTCTAGATTTCGTAGGTTTATGTTTAAA
>AT1G19330:665-715
AACTGTGACAATGACAATGACTCGATAAAAGTTTTGGACAAATAATTGAT
>AT1G19330:785-875
AATATTCATAGATCATATCGATCATCTACCTTTATAAAACCTTTATAAAACCTTCTTATAATCGGTCGAAAAAAGGTTTTTGTATTTGCG
>AT1G19330:935-1025
ACACAACATTAAATCCCTTAGATTTTCTGTATCTAATATACCCAATTATCCCATCGACCAATTTGATTGCTTTTTAGCCATTATATGAGT
>AT1G19350:85-175
TTCCTTTCATAAACAGATGATGTTTCAGATAAAATTTAAATATATTATCAGTACAGTAAGATTACATACTATATTAGTATCACTATTCTG
>AT1G19350:390-470
CATCATGACCAATGAAGAGCAGGTCCCAACAATAATTCCGAATTATAGGCTCTGATTGTTATAGCAATCAAACAATATGC
>AT1G19350:750-840
TGTCAAATACTTAATTTAGGACTTAAACTTCGCTTTCAGACAACTTGGTTCGGAAACTTGACCATCCGTCATGTTGATATACACAATCCA
>AT1G19350:910-1010
TTCTAGTTCAAAATGTTGATAAGTATTACGAAAGTACAATTGAATATACCAATTATACATCCAAACACGTCCATGCTTCTCCACTCGAGTTCTCTTTGGA
>AT1G19350:1180-1260
TCACTCCATTTTACGTATATTCGTTTTCACAAATAATCTACTAAATAATTTTGTAATGTGATAAAATTAAAGAATAAACA
>AT1G19490:430-485
GGCGTTATAAATCTATTTGATGATACCATGATTTCTGTATCTATTTAATAGTAAT
>AT1G19490:670-735
AAAGAGGTCCCAAATCGACTTATGTGTAACTGATTATATTTATTTAATCTTCAATGCATATATAT
>AT1G19490:885-975
CCGTTAACATCTATACCAATGTGGCAATGTTCTAAAACTTGCTCTAGAGACTAGGCGGCCATAAACTGTGACAATTATCTATCATGCATG
>AT1G19490:1020-1110
TGCGACGGGCCAGTTGTTATTAACCGGCCAATTACCTGGCCCATTTATATGTCCAACAAAGAGGTCTAGAACCAAAATGATTGTGTGTTG
>AT1G19490:1095-1230
AATGATTGTGTGTTGGTGGATGCACCCAAAAACCTCAGCCGTAATTATTCACCACTGAATCTCATGGCTCAGACGTCGCCACGTAAATATCCAATAAAACCACCACACGTGTCGCAATCTGAGCAACTCTCAAAA
>AT1G19490:1280-1395
GGCGGTCCCAATTCTCGGCTTCGCACGCACGAATCAACTCCGCACGTGCCGAGTATGCTGACTTGGTAACAAAAAGCGAGACGTGGCGGTCACAGATACATGGGCTATACTTAAG
>AT1G19570:260-335
AAAGCATTCTGTATATGATTGGGGATATCATATACCCAATCACCCATTAGAGCAACTGCCAGTATCATCAAGATA
>AT1G19570:1075-1140
TAGGGTTCCCATTGATCGTCACTTTCTTCGAGCTCACAGGTAAACGAGGACTCAACACTGAATGA
>AT1G20010:30-95
TCAATCAATGCCTATATATCCACATTTGCAAAATGATGAATGTATATACAAAATTGAAGTTGTGG
>AT1G20010:775-900
TTATTGTTTCGGTCATCTCCACAAGGTCGTCAAACCATATACAGATATACTATAAAGTAGTATAACACAACCAATTCCATAAATCTCTTTTCTCAATATGAAAAACGAACTAGATTAACTACAAA
>AT1G20190:310-360
CATAAATATCTAAAGAATGAAAACAGGACATGTGTATTGACCATTATGTG
>AT1G20190:430-540
TTTTAATTATAGGTGTTTCTGGTTCGATTCATTAACTTCTTAATAATGACAAAAATCTGTAGAATAATACCCGGGCTCTTTGATAGCTACAACTGCCAACTATTTAATCC
>AT1G20190:605-805
ATCATATCCAAACAAGCTCCTCAATTCCTTAATCTTGTTGTATCCAGTATCCATATTTTGTTTTCTTACTGCGGAAGTTACTTGGTAGTGTAGTCTGGATTTCGGATTGCAGACTTTGCAGTCCACGATTTTTCATATGTTGGTGACAACGAACAAGTGTTAAGTTGACGGAAGTGTTCGTAACAAACGACGTCGTGACG
>AT1G20190:860-950
AAAATAATCATAATGATAATGAAAGAGATTTGGCGTGTTGCTAATAATGTAGGACAAGTGAGCATGTGAGAGTCTGTGACCGATGAACCT
>AT1G20190:1025-1090
ATTTTAAGCAAAAATTAAATATCCACCGCGTTGCACAAGAAATCATTTACCCATATGATTATTCT
>AT1G20310:315-375
TTCGACTTTCAATACGATATTTAGGTACATTGAGAAGAAGAGAGACGTGAATGGCGCTCA
>AT1G20310:380-470
TGTATTCGAAGATGATGGAAGCGAAATGTGAGCCGAATACGGTGACTTATAATATACTGATGAGGATGTTTGTCGGGTCAAAATCTACTG
>AT1G20310:540-630
TTTGGTTACGATGTTTTGTGGGATGGGACATTGGAATAATGCTTATAAGTTGTTTAAAGAAATGGTTGAAGAGAAGTGTTTGACACCGAG
>AT1G20310:895-980
TCTACTATGTTTTACTTGCATCATGTGTATTATTTCATAAATATTTAAAAAGAGGAGGATAAAATTTGGCTAAAGTTAGGAAAAA
>AT1G20310:970-1060
TTAGGAAAAAAAAAATGTTTGAATATTAAACAAAATTGAAGTTGAAGATTTCGCTTTAATGTGTGTGTACATATACCATGGTATGTCATG
>AT1G20450:0-65
AGTCGCCGTTACGTGTACGAAAATTAATGGAGTTGGATCATTTGTGTGTTTGATCTATAAAATTG
>AT1G20450:70-130
TCTTTGGGGTACAATTATCTCATTCTACTCAAAAGTAGAAATTCTAGAGGGATAATTTTG
>AT1G20450:295-385
CCTAATTGAACACTACGACTAGGTGGACAAAATAATTTGTTAATTAAATAAAAATTAGTTCAATATAGAAATGAAAACGATTGCTTTGTT
>AT1G20450:410-525
CCTAATGCCTAATATAAAAGATTCGATCGGTATGTTACAAGTTGCGTGTATATGAAAACGTCACATTTTATTAAGTGGCACGTCGTTGTGATGAATCTTTCAACCGAACACGATT
>AT1G20450:615-670
TTCAATCTTATTTAAATGTAATGACAAATTAAATGAAGTTTACGTTAGTAATATA
>AT1G20450:855-945
TTAATTCACCGAAAGTCTCTGCAATTGATATTTTCTGCCGACGTGGCATAAGAAGTCCGATTGGCCCACATGACCGACATCCACGCTTAA
>AT1G20450:960-1035
CCATTCAGTTCCATCTGTGGGCTCCTGAAACGTTCTCTTGACACGTGTTTACCATATATTGGCTTAATCCATCCA
>AT1G20450:1045-1160
ATTTACTGACAGGTAGTATTTTTCCTATCAATTATTTATTTTCACGTGGCATGATGGCTATGGCTAGTTGAACCTGTGAATAACTTGGTCATATCTACTCTCTATTTATTTAGAT
>AT1G20510:0-65
CCGAATGGCGCTACTGGACTTGGAAGGTTTGAGAGAACTACAAGACTGCGCAAACTATCTTCTCG
>AT1G20510:710-840
ACTTCTGGAAGACATCAAACAGATATATACCTGTAAAAATTAGAATTATAAGCAAATACAGAAATATTATCGTCCTACAAAGTCAAATACACGTATTAAAAGTAATTTCCTCACAGTCTCTTTATTTCGA
>AT1G20510:1010-1080
CAGAAACCAAACCTTCAAATTACGAAACAGAGGAACAAAAAAAAACGAACAGAGTCTTACCACCATCTCT
>AT1G20510:1300-1355
AATTGATTCATAAATCCAAGGTAAGTAGTAATCACCCGAATTCTAGAAACATATC
>AT1G20640:60-135
TCCCTTCTCAGTTTGTTGTACCATATTATAACCAGACCATGAATAATCTCTTATATAACTTGACTTGATCACAAC
>AT1G20640:210-310
GACTCCAATAATTAAACCGCTTCTTTTTTTTTTGTTAAAAATGTAAATATTTTATAAAATAAAATAAAAACAGATTAGATTTACAGTCAAAAGTTATTGA
>AT1G20640:445-520
TTCTTACTATGTGGTTACTAATTAGAAACGTATATGTTGATTGTTGAAAACATATTTTGATGAATTGTTCTAGCT
>AT1G20640:550-645
AGAACTCGGTTCGAACTATCATAAAACTTTTAAAACGAAAGTATATTAATAATCAATGGTTTTGCCTAACCAAATAAATATTTCTTTTATTCGTT
>AT1G20640:865-1045
AGTGGCCTTTAAAGATTCTTTAATTTTTCATAATTATAAAAAGATTATAACAACATGTAACAAAATTGACAATTGTAGGACATGAATAATTATTAACTTATCCTCAAACAGCAACAAAGCGTCTAAAAATCGAAAACGATTCGCTTTGGTCATCACCAGCATAATAAAATGTTGAAGAAT
>AT1G20823:15-95
AATAGATTGTATTTGTTTAGATTTTTGGGGGTTGAATGCACTACGTAATAAACTTCCTTTAAGTATAGTGTCGTATGGCA
>AT1G20823:290-410
TACCAATTCATACATTAAAAGTTGTCTTTATTAAATAACTTAATAATATAGTATATTTTGGTGGTTTACGAATATTAATCACCTAGCAATAACGAATAAGAATCATATTTTTTCCACAAG
>AT1G20823:480-560
AGTTTAACCTAATGAAAAATCCGTTTAAAGAATTAATTGATTAAATTATAAACCAATAAACATCGAAAAGTTTATTTGAG
>AT1G20823:945-1035
ACCTGAATTATTTTTACAGTTATTTTAGCCATATTTTGTTACGTGAAAGTATGTGTCTTCGAGTCAAAAGGCAACTATTGGTTAACTGAC
>AT1G21050:0-75
TATATCGGATATTTCGCATGGTAAAAAAACGTTATATACCCAACTTTTCTGGGAGAAGGTCATTCTCTTAATAAG
>AT1G21050:120-170
CAATACGGACGTAGGAAATTGAACATAAAAGCAAAAAAATTGTTGTTGAA
>AT1G21050:680-770
ATGAAAAACCCACAAAGTTTCTCAAACAAAAAAAATATTAATATTATATTATAATTTGATTATTTGATTAAAAAAGTATTTTTGTTAAAA
>AT1G21050:950-1020
ATTTTGATGTTAGTAGAGAAGTTTATAAATCATAATTCGATTTATAAATGATAACAGTGAAAAATGGATG
>AT1G21120:40-155
ATATATTATATAGTCGTATTTCATAAAGATAATATATATTGTTTATAATGGTCAGACAAGGACTATATATTAACCGTTCTTGACTTAGACCTACTCATTACATACACAAGATTTC
>AT1G21120:170-260
AGTAACATTTGGATTTTGGTTAAGTGAAAAAAACGTCACTCGTCGTGTAAAAGAATTAATACAGTAATTAACCAGGAAGATAAGTCTCTT
>AT1G21120:270-365
ACTAATTATTAAGAACTATTTTTAATAAGAGTAGCAAGGATAGTATTAAATAATTATAATATATGTGAGTCTACTGAAATTGATAATTACTAAAA
>AT1G21120:530-700
ATGGACGCCTTTAAAAGAAGATCAACAAGTTTTTTTTAATTAAATATGTGATTAAATTTTGAAAGAAATAGGAATTCTATAAATATCCAAGAAAAAAAAATCATATTTGATTACTGAAAAATAAATGATAAATATTCTATTTGCCTTGGTTGGAGCACAAATGATGTATT
>AT1G21120:820-910
TAGGGTTATTTATTAGATGAAAAAATCTCGAGGTTAATTTATAAAATAATTACGTTAAATATTGATTGAAAACTTATTTTCATTAAAAAA
>AT1G21130:0-50
CATGTTATAATGTCTCCAATATTTTTCAAGCATTGTATATATTATTACTA
>AT1G21130:70-160
ATTTGTAGAGCGGCTTGATCAAAAGCAAAATTCATTAATTTATTATTTAAATTTGAAAATATTGATCCTAAATCAAAATAATGCATGGTA
>AT1G21130:310-410
ATGAAACGCTAAATATCATGTAAACTCGGTATACTTTCAGTTATTAACAGTTGAATACGACACGTAATTTTGCTATGTCGATGGTGAATCTGTGCGTAGC
>AT1G21130:505-625
TCTACGTAAGTATATCAACAAAAAAAAAAGAAATACAATTCTGATAAATATATATCAACAAAAAAAAATGTTTATAATCAACATAAAACTTTCAATTCTTGTCTAAATAAAGTTAAGATA
>AT1G21130:640-735
CTTAACTGGGCCAAGCATAAATGGGCTTAACATGATGTGGATTAATGATAAATGGGCATAACGTAACAGACCAATGAAGTATATGTTAATCCAAC
>AT1G21130:815-895
GTGTTCATTGTCCGTTCTGATCCAAAATAAGTTCGTGTCTTCGTGGAACTGAATCTTTATGAAGAGTTTGCCTTGGCATG
>AT1G21240:105-240
CATGAGAAAATTTGGTGGATTCTAGAAAAGCACTCTCCGTCAACGTGATCGATATTATGATGAAATGATTACAAAGATGCAATTATATATATCCACGAGCAACAAGACGAAGACAAAAATGTAAACAAGTTAACA
>AT1G21240:300-355
AACTAGTAAACGAGAAATCTCTAACTTAAGATGCGTGGTATGTACGTAACTCCAA
>AT1G21240:380-455
TTTTTTTTTTTTGAATGTAATGTTAAATTATATTCAAGAAAAATAACGTTTTTGATACAAGGCTTTGAAAGTATG
>AT1G21240:495-555
TATTGCTCTGTTATTAAAATTTTAATACTGCGTTTTCTAAATTAAATTATCATTCTTGCT
>AT1G21240:775-850
TGGTCGTAATTGAGTTTGGTTTGTAATATATTACTTAAGTGTCGTGTCTGTTAAGTTAAAGTAGTTATGTTTGTT
>AT1G21240:1040-1110
TGTTCTTAACTCTGTTCTGTTTCTAGAAGGAGATTCAGTTTCTAACAAAGTGGTGGATTTGCATGGAAAT
>AT1G21250:350-450
TACTTCCATTTGATTACCCCAATTCATGTTTATTGACTTACTAATAATACCAAGCACGTATTCAGACTAAAATTATCTTAGAACCAACTTCAGTGGATGA
>AT1G21270:700-835
TTTTAATAGGAGAAATAGTTAGTTTTATACATATTAATCTTAAATAATAGTGTGATCCAAAATATTTATAAATCTAACATACAATTAAATAAATAATTCAGAGTTTTGTTTAAATTGGTTTCTATTTACTCTATA
>AT1G21270:860-1000
TTCGTAATTTAAATGGCCCGAATTTCATTGGTCCGGCTCTGTAAAATAATATTTACTATTGCAGATTCCTGCAATTATTGGGAAAATGGGGACTAGTCAACGGAAGCAAGTCAAGAGAACATATCAAGAATGGAGTGTGT
>AT1G21500:1280-1345
ACAGCTACGGGAGCTTAATTATTGCCATGTTTTTTTTTAAAAAATTATACTTTCAAATCTTCAAA
>AT1G21520:50-135
TGTCTTCATTCCAGTTAATAAACTTACAGAAAACTTAAATAATACGAATACCCTAGACCATAGTTGAGTTTAGTAAACCGAACCA
>AT1G21520:210-280
ATAGAACTATAGAAGAGAAGTACAATTATTTGGAGCAGGCTAATTATCTCGACATTCGGTCGTTGGTCTT
>AT1G21520:330-415
GACTCCACAACTGTTTCCAAAATAAGAATCTTCCAAATTATAATTATGATTTCCTACTAATCTTCCCGTTCAACGTTCACACTTC
>AT1G21520:845-965
TGGTCAATAGTCAACGTCAAAAAGGATTTGAAAATATTGTTATTAATCAAGCAAGTTAGTCATGAATATGAATTCGTGTATTGAAAATTTAGATGGATTCGGTGGTTGGAACGCATAAAA
>AT1G21520:1085-1220
AGCTTTACTTGTTGTTTCTCAACTTCACTAATTGTTGATTAATTAAATAATCAGAAAAGAGCCGTGAACAAAAATATAAACTTTTATTACAAGTTCTTCTTTTGGATAAAAACTTTTGTTACAAGTTCCTTGCAC
>AT1G21520:1255-1425
CCTTTCACTAATATATGAAAATTGAAATACATTAATACAAGATAATTAATTATTAATGAAGGGGATGCATGAAATTTTCCTATAATAATATATATTTTTCTTTTATTTGAACTGGCGGGTTGATTATTAAGTTACGTATATAAATATCCAATAAAATGTTATGAAAATTA
>AT1G21550:0-65
CATCTTCTCTGAAACTATCCAACAACTTTATATACTGATAATCCATTTTGGTACCCCAGTCATCA
>AT1G21550:520-585
GTACAGAAGCTATTATTCCATTACTGAAAGAAGAAGAATATCATTTAAAAGAAACATCTCGATGA
>AT1G21550:785-855
AGGCTTTTGTTCATTATTTTTGTATAAATAGTTAAATGAAAAAATTATGGTAGGAAATAGGATTTGGTTG
>AT1G21550:985-1075
GGATGTGGCCGGTGATAAATATCTACTAAATGGGGACCGTACGACTTAGCCACGGAACTCGAGAACGTTACCGAACATTCCATATGTCAA
>AT1G21550:1145-1200
CATAGCACATTAATACTATTTATCTATCAAAATACAAGGTATAATAATATAGTTT
>AT1G21550:1340-1405
TACTGTTTTTACTTAATATTAAAAAAAATCAAAGATGATAATTAAATACGCTATCAAATTTTCAT
>AT1G21750:70-160
ATTCACGGGTATAAATTGATCTCAATTCTTTTACTATTCCTACATTTATATATTTTCGTTTGTGTGATCCGATACTTGGGATTTGAAGGT
>AT1G21750:595-685
GAGTGAAAGCAGAGTATGTGTCACACGATTTCGAGAAACGGTTGAATGATCTTCGGATGGAGAGGGCGAGAGTGAGAATGAGAAACGATC
>AT1G21750:1120-1280
TTTAAATTAAATTACTTCTGAAATCTGAACCTTATAATAATCATTAATCTATGAGAAAATTGATAATAATCGCAAGAAACCAAACATAATTGGTCAGATTTAAGATCTATGACCATTTACTTGCACGAAGTCACGGACCTGAGATCTCACAACAAGATCA
>AT1G22160:0-85
CTTTGAACTATAGAGATTATATAATAAGTTATAATATATAAACGAATAAAATCGGAACCCAAACATTAACATCTGATCAACGTAA
>AT1G22160:175-245
AATGAAAACATTTCTCCGTAAATAATTATGTGTGGACCAGAAGTTGAAACCCACTTGTGTACACAATAAA
>AT1G22160:230-320
TGTGTACACAATAAACTAGATTAAGACCTTTGTTTATTTAAAATAATAATGGCTTAGACGTCTAAGCGTTAGACGGTCGTTATCTAGATA
>AT1G22160:400-520
GATCTGTTTTTTTAAATATAAATTAACTATAAAATCATAAACCATTATATTTTAAACGAATTTGACTAAAACAATTTAACCACCGTGCAAATAGAATTATAAAACCGTCTGTAAAAAAAA
>AT1G22160:530-595
TCTCTTCTCGAAAACATTAATTGAGAAATAAAAATGGTACAAAACGTAAGATTTTGAGACCGACC
>AT1G22190:190-365
AGTTGACTTTTATCAAAAATACATAACAAAGTATAAGAAAAATAACGCTTAGACAAGTTATTACACATATGCAATGTTCACCAAAGCAAGCAAGTACGAAATATACATGCATATGATAATACATGTAAACGAGATAAATCAGCATCGTAAAGATGAACTGGTAACACGGACACGA
>AT1G22190:380-440
GGTACCTCCTTATGCGCGTCTTCCCTCAAAATATTGATCATTATAAAATGATGACACCAT
>AT1G22190:455-545
ATTGACGCCGTATTGATTGTAGTGACATTTGTACACGATTACACGAAGCAATAAATTAAGTGATGCAACTCTATAAGATATCGTAAGATG
>AT1G22190:625-675
CCCTCTAGACCCTTCTTTTTTAATCTTGTATGATTTATTATCTAAATAAA
>AT1G22190:690-865
TTAACATGATATCATCATTACATTGCGAGCCAAAATTATTGCTTAACAATCATGAAGTCTACGTGTGTCACATTCGGAACCTCCGAATAATTATTTTTATACTTTTTCGGTTTGATATACTTCAATATATACTATTAATTTGGATAATCTCATTCTTAATATTCTCTCAGTTCCA
>AT1G22190:1110-1200
GAGTTGTGTACGTCCACTCACTTCTATTTGAATAGAAAAAAGATTAATATGGTTATGGAAGAAACGTCCCATAAAGCCGGTGTGAATGTA
>AT1G22280:470-520
ATAAATAAGGAAGCTAAGGTAGCTAAATTGATGTGTGTTTGATTAAATAA
>AT1G22280:780-975
CAAAATGGATATGTTTTTCTACGAAACTGCTAATTTCATGCATTAATTTGTGTGAAAACGAAACATTCATTTACTTTTTACTTACTCATAATAATCTCTCTAAGCAAAAATGTTTTATATTTTGTAATATTAAATAAAACTCTTGCGGAATACGTCCTAATAAATATCAAAAACCAAAGGATTGTGTTTTATTTT
>AT1G22280:1015-1170
TTCTAAATAGTTTCGCACATTTTTTCATGTCTGAATAGTAAAAACGCATATAAAAAAATAAAATAGGGATTGTTAAGGAGATGACATAAATGTAAAGGAAGAGGAAGTCAACATGCCAAATAGCCAAGACTAAAATTTTTAAATGGCAGCTTTTT
>AT1G22280:1345-1485
TACAAATTCATCACCTAAACAAAACTACAATTTAAAGGTTAAGCAATTATTGTTACCCAAATTAAATAATCGAAATCTATTATAGTCACAATTTAAAATTCATTCATATGAGGCGTAAAGTAAATATTTATATATATGAA
>AT1G22330:50-140
TTAAATATTCAGCAATTTTATATGTACATGATTCACATTACGTTTAACAAAACCAGTTTTCTAGTAGACCAATGAAAACGTAACTTACTA
>AT1G22330:350-475
TAATTCATATAATTAGATAACCCTTTACAACTACATTTACATATACATGTCTATAGCCTTATTTAACTTTTTTTTTTATAACTATATTTACATATGAACGTATGTGAACGCATGTATATGTATTT
>AT1G22330:530-610
TAAGTTTTAGCGAGTTATAGTCTTTTTTTTTTTGATAAATTGATAAATAAAACTAACTAATCATAAGCAAGAAGAATGTT
>AT1G22330:610-675
TTTGACACAGAATCAAATAATGAAGCAAGAAGCATGTTGTGATTAAAACGTCGTCTCTAACTTCA
>AT1G22330:680-770
GAACTCATAACTAATTCACTACTCGAATATTAATGGACATAATTATACAATCACATCAAAACGATCAAAACTGTATGTACTCTATTCATA
>AT1G22330:865-945
ATATCTATATATTGCCGTCTTTTTTAGTCTAATATTAAATAGTCAATTTTCTAAATGGGGGATGAGAAATCTCTACAGGG
>AT1G22330:1105-1195
TTGATTCACATTACATACTTACTTTACATTTGGCTACGAATTATTAAGAAAATTTAGTTAATAAATAAAAAATAGTTATGTCGAGATTGC
>AT1G22400:775-830
ATTTAGCTTATCCAATTCGCTTGTTCTTTATCATCCGTTCAACCATTTATACCGT
>AT1G22400:870-1005
TGAAAACTCGAGTCAAACCCAAGTCCAAAAGGGCAATTCGAACTTGGTTATTGTATCCAAATTTTGAAGTCAAAGCCATGCATCAACTTGGTTACAGACTGTATCCAAATTTTGTTTGTCACGGAACGTATCTTT
>AT1G22530:20-110
AAACGAGATGGCTTTTTGTGGTTGATAGTACAAAAGGTTGCCGTGTACTTGAAGGTAATAGTCAAACCAGTTATGATGATTTCATCCAAA
>AT1G22530:1160-1250
GTTGTCTTTACGTAATATGAAAACATAACATAACTCTCTTGATATTAAATCTAGGTCTAGAACTCATGCGAACCAAGTTTTGGAAGAGAA
>AT1G22770:15-230
TTAAACTTATAATATATCAACTGAAATGCCTACAATTTGAGAATACGCCTTTTCAAAAAGTTTTAGAATTTTATAAAAATTTCTCCACCATAATATTACTTTAATAAAAGCTTGTTATTAAAATGATATATTAACAAAAAAAAAAGAGGTAGGCAAAGTAGCTTTTATTAAAATTAATGTTTTCCCTAATTGGTAAATCATAAACCAAAAAATTG
>AT1G22770:250-315
ACTATGATTAGAATGATACATTAATGTAACATTTTATCATCTTCATTAATAATAGTAAGTTCTCC
>AT1G22770:475-555
TCTTCAGACAAGAGCCATCCAGACAGAAGTGGACCACACAATCACGAATCGTATGGAGATCATTACAATATATTGCTCAC
>AT1G22770:550-645
CTCACATCTTATTGCGCCACGTCTCTTATTTGGCGAGTGATCAACGTCCACAGATCTCTTGCTCCACTCTGATTGGTACACGTCATCATTTTATT
>AT1G22770:950-1075
AATGAAACTATTAATTAATTAGGCAATCACATGAGAGATGTTATATACTTAAATTAATAACTCAATAATACAATCATGACCACCAAACCTTGAAATAAAATAATCTCTCTGATTACTTGTACAAA
>AT1G22770:1100-1180
TGAATGTAATGGTTTATTTTAAAACAGCCAAATATTATTGATATAATTATATGTTTAAGTAGATTTTAAACTTAGCTCAT
>AT1G23030:40-95
GTGTTTAATACGGGACAGTACTACGGCCTTAATTGATGTCCTCGTCCACGCCTGC
>AT1G23030:155-245
AGCTCCACGACCACATTCTATTTGTGATCCACTTTCATTCTAACAAACCAATAATTTGAGTGCATTTTTAATTCTTAACCCATTTTTTGT
>AT1G23030:310-360
AACTTGGTGCTGAGTTCTTTCTCACCATTGGACGAGCTCCATGATAACGA
>AT1G23030:390-455
ACCATGTAAACTTCGAAACATTTAGAGAACTTGTTATTGTATAACACACGTACACAATGCTATAA
>AT1G23030:520-695
ATACTGAACGTGGACGATCATTTTTCCTCCTATCAAAAACAGTAAATAATTCTTTAACCAAAAAAAAGCATAGTAAGGAATTTCATGATAAATTTACAGAAACCGTAGAAGAATATATACCAATCAATAATTGGTGATGATAACGTCAAAAAAAATAAAAATTGATGATGATAAT
>AT1G23030:765-850
TATTTATTAGATTGACCCATTCTGTTTATATATATTATTAAAACCCATTACAACTTTCTTTTACATAAAAAGAGATGATAATATA
>AT1G23030:1030-1110
ACCACCGCCAATCTCGCCTTTTTTTTCCCTCTCATTTATTTATTAATCTACTCATTTTTTTTTTTTGACATTATCTACTC
>AT1G23030:1100-1175
TTATCTACTCAGTCCTTTATTTTATTAATAATCCAATATAGAAATTTAAAATAAGTTAATTCTTTCAAAACTTAG
>AT1G23205:155-245
TCGTTTATTTAAATTTTTGATAGATCTAACGTCTCAAAAGACCATTACTTACAAAAACATGTATGTCATTATTAATGTTACCAATTTATC
>AT1G23205:330-420
TAGCAAACAGCTAAGTTGCAATACACGAAAATTTCTAGTCGTTATAAAGTAATGACTATTAAAAAAATAGCAAAATAAGAAAAATAAAAT
>AT1G23205:525-610
AATTTTAATTTATTATCACTAAGTTTTATTTTATTTTAATAATATTAATTTAGAATGATATGTAGCATTCACTGGTGTGATGATG
>AT1G23280:545-605
ATCAAGCTAAGCTAAGACTTTGTTGTAAGAATCTAAACACTATTGTGACATTGAGTTTGA
>AT1G23280:680-775
ATGCAGAGATGAATCAGATCACACAAATAATCCCAAAATTTCCAAATAATACGAAGCAAATTATATAATCCAATACCATAGATTAAAAGATCTCT
>AT1G23280:1000-1080
ACGGAACATTATCCTTGCTCGATTTCGCCTTCACGTCTTCAGGAACAAGTGACCATAGCTTGTCCAGGTTCACGATTGGG
>AT1G23280:1205-1275
ATGCTTACGGTGCTTACCGATACGTCCATGTCCGGCGCTGACGTGACCTCTCTTCTTTCTGTTCTTCTTC
>AT1G23390:55-110
GGATTACGTGGATGAAAAGGACCGGTCCGAAGAGTATTATAGTGACATAGACGAT
>AT1G23390:265-340
AAACATACATACTAAAAACCCAAGTGCCATAACGAAGTACTTCTAGAGAAAACCCCAGAATGCTTTAGTTTTCGT
>AT1G23390:465-555
CACGTCGTAGTAGGTTATGAGTAGATTATAGGTCTAATCAAATATTATTTTACTGTTATTTTTCTTTTTGCGTAAATATCTTTCTCCTCT
>AT1G23390:670-815
GTCCTGGCTTTGATATTTATCTTCAGGTTGTGTTATTTAATTCATTAATTCCTTCGGATATGAAAACGTAAGATTAGAAGCAAGCAGGTTCTTCTATATACTATTACATAATAATAATTAAGCATTGTATAACTGTCTCTAATAT
>AT1G23390:940-1000
CACAAAAGTCATTATAAGTAGCTGGTGCGTTGGTCAGTCTACATTTATGATTTGAGTTGG
>AT1G23710:20-95
AATATTTCATTAGCCAAATGTTGTCTAGTCAAATGTCGTGAACTAAATAAACCGCATCATCAAGTGGAATCGTGG
>AT1G23710:130-220
AATAAATGTGTGAATACTTGTCTTTTATCTTCTTGGGTTTGATTATAACATTCAGAATTTCAGATGGTTGTGACTTGTGGCATTAAAATG
>AT1G23710:365-455
AGTTACTAATGATTTTTCACAATATTACTTTGACCTTAAAAATAAATGAAATGATGATATCCCATTAACTAGCAACTGAATTGATCTTTA
>AT1G23710:570-640
TATCTTTGATCAATATCTCTGCATATTATAGGTCAACAACTAAACATTTATTTTAAATTTGTTTTCAATC
>AT1G23710:640-725
TCTCTATTCTTTATCCCCACCTTCGTTTTTTCTTTAATAATGTTAAATAAAAATATTTGTAACGTTCATATTTTGGGAAGTCTTC
>AT1G23710:710-790
TTTTGGGAAGTCTTCAACAATATTCGACGAACATTTAGCTGTAACGTCCAAAAGTCACCAACCCAAATAGAAATTTCGAA
>AT1G23710:835-990
AGCTCAGAGCAAATAATTGTGTTGGTACACACAATTAAAACTTAACAAATACTACAAGATTGATTGACCAAATTATAAATGTTAAACATATGGACCAAAATCGTTGAATAATATATAAAGCTTTTGACATTTATTAGATTTGTTAATAAACATGT
>AT1G23820:20-70
TAAATAAATATTTCCTCGTTACCAAGAAGACATGAGATTTGGGCCGTGTA
>AT1G23820:180-290
CCAAAAAATACAGAGCAAAACAAACAAAGTCAAGTAATTCTAATAACAAATATATTTTCTAATTTAAGTAAACCTTATATGAATTACGAAATTGATAATAAGATTTTATA
>AT1G23820:325-375
TAAATATGTTTTGTATATTTTTTAAAACAAGATTTGGACTAAATTAATAC
>AT1G23820:450-540
CACAGATTTTACCAATTATATACTTTTGCAACTAAAAAAACCAGAAGACTGCAGTGTAAAAGCTAATGCTAAGATTTTACTAATTATCTG
>AT1G23820:815-895
TAAGGTCTCTTTTTGTAGAGTGTATGTCGCTAGTGACATTTCTAGAACGAAGGAACTCATCAAAGATCACGAGAATCTGC
>AT1G23820:1265-1320
CTAGTCCGTCCATGTTTGGTGGTGGTACAGTATGAGAATTTTGCACGTGAGAAAG
>AT1G24140:0-195
ACTCTAAAAGCAAAGATTTAGAAGATTTAAATCGTTAATTAAATATTTTCATTTCTAAATAATTAATGCCAGTAGCATGACATTGTAAATAAGTTCAAATACAGAATTTATTTATTTAAACAAAAAACGTTTAGTAAGAATAATATTTATTTAAACAAAAAACTTTGTTTTAAAATATTGTTAACAAATACGTTT
>AT1G24140:230-355
GGATTAAATTTGATTGATAATGTGATTGACAATTTAAATTAAGAATTTAAAGTAAAATTAATTATTTTGAAAAAAATATTTAATGCTAATGGCATTGGGTTGTAAATAAGTCCAACTCTAAGATT
>AT1G24140:520-755
CAACACTGTCTTTTCATAAATATATGTATTTTCTGTTTTTCCATATACTTTTTTTTATTAACAAAATAGACTTTTCATGTGATATAAAAAGACTTTATCTTCTTAAGATCATCTTACACCATCCACATTGCACATTTATATTGGATGTCTTCCTCCACAATAAACTATTAAAAGAACTAAAATATAATTATTAAAATATGAAAATGTCTTTAAATAAAAATTCTCCTTCCCATAA
>AT1G24140:770-905
ATTTTAACTGAATGTCTCTCATTTAAAGACACTATCATATTTTAATAATTATATTTTGATTTTCTTAATATTTTTTTTTTTTGGGGGCAAACGAAATTTTCTTAATATTTTATAATAGAGAAAGACACCCAATTA
>AT1G24140:960-1050
CCATTAGTCATACACTAACCGTATGCAAAGAAAACCTATCACTTGGTGGTAGAATATAATTAAGTATTATTAACCCAAAGCACACCAAAA
>AT1G24140:1065-1160
AATCTGTAACTAAAATGAATTAGTCAGTCAAAAATATCATAACTACGAAATAAATGTACACTAAACACTATCAAACGTCCCTTAGTTTAGATTTT
>AT1G24140:1170-1260
GCTATGCGTTTACAGGCTTCTAAGTTTTAATAATGTTGGTGCAAACGTGGTTGAACTAATTCTGAAAACAATTTTTAGCCTAAATGGATC
>AT1G24140:1355-1495
ATATATCAATTAATTTTACCGATGGAGACTTGCATGTTATACCCATTACAGGAAAAAATTAGATAGCCTAACAAACAAGTCATGGCGTTACTCGTGTAAGGTGGAGATTTTACGTTGATTTTTTCAACCAATAACAACAA
>AT1G24145:0-85
TATTTAAACTTTATAAAACATTATTAATATTTAAACTTATAAAAAGTTTAATATATAAAAAAATTTAACATCATTATATAATATA
>AT1G24145:180-285
GGTTCAACATCCCGCATCGACTAAAATATTTAGACAATAATTCATAAATAAGATCAATATTAATAAAATAAATGGTTTTTTTGCAGGACGGGTTTTGCGGGACGG
>AT1G24145:835-925
GGGTTATTCCGAGCACTTCACGTCATGCCGAGACAAAAACCTCTAAATAGCAACGAGAAAGAGTGTCCTTTTATAGAAAGACTAAGTCTT
>AT1G24145:1060-1180
GGAATATTTTTGCTAATTTCATGATTTTTTTTGTTAATTATGGGACTTAATAATAATTTAAAAAAACATAGAAAACGTAAAAATTTGAGACCCAATATAAATGTTTCAACATTATGCGTA
>AT1G24147:25-115
TCCTTCTTGTCAACGTCGCACAAGTCCGTTTACGGATATGGGTGAATAATTGAATATTATCCATGTTTCCTTATTAGCAGTCGCTATTGT
>AT1G24147:440-505
AGTCTTCTACCTGTATAAATATATATATATATATATATATATAAATAGATTACTTTTGAGTCATG
>AT1G24147:575-755
TACTAAGCCTAATTAAAGGCTTGACGCGCTATATGTTATGTGTAACGTGCAGGTGGACCGAAAAAAACAATGACCATGAGGAGAAACTTGGAAGAAAATGGGCGCCAAGGCTCCAAAATTGCAACTCCTGGGAGCACGTCACGGCACAGTGGACAAAAAAACATTGAAAAAGAGCCGTCA
>AT1G24580:5-95
ATCACCAAAAGAAGAGAACATAGTGAAGTCCACAAGTATATATAACGGCCTCTCTAGATTATTTTTGTTACATTACAAAATGGTTCTGAA
>AT1G24580:175-270
TGTTTCAAAAAACGTCTCTATCAAACTCAAGTTTCAGACATATTTAAACCATTAGTAACTTCGTTATGTCTTTAATAAAAAAACAGATTCGTGGA
>AT1G24580:825-885
GTTCTCTTCCCTATAACAAAACCTAGGGCTATCTTAGATTTTCTAGATACCTTGACAAGA
>AT1G25230:0-90
AAACAAAGAAAAAAATTATCCTTTTGGCCGGAGATTTAGTGTTGTCCACCGCTTCGGCTTGAGTCAAGGTGTCAGATCTTGATTGATTTG
>AT1G25230:265-340
AATTTGTTAATCTTATTGCTTGTTAACTTGGTTAGTCTTCAAACTTGGTTTGTTTTAGTTATTTGGTTTTGATTT
>AT1G25230:425-480
CTTGTGTGTATAAATCGGGTACTCACTATGGATTTGACCTCAAAATATTACGTTG
>AT1G25230:555-660
TTTACCACTACTTTTTATTATTAATGAGCTAGTTAGAAGAATAAAATAATGAAAATAAATAACAAAATTTGTAATATACACATGAGAAATTGTTGGATGTTAAAA
>AT1G25230:665-825
ATGGTTTTTGTAAAAACAAAATTCTTCTTGGGGTTATAATGTTATATTATTATATTTGGAAACAATGATTGAACAATATTATTGGATATAACAGATCAGGCTATAAAGATGTATATACATGATATGGTGATGCAATTATTTTGTTGTTTTGCTTTTGGTA
>AT1G25230:990-1080
ATATCTACATACTCACCATTCGAATTTAAAACACACTTCTTGCATTTAAAAAATCAATCACAAGCTTCCCAATAATTCATAGTCGTTTTT
>AT1G25260:125-215
TTTGCAAAAGCATTTGTTATAACATGACAAGAAAACTATTATACATTTACATCGATGCCACACATTCTTATACGAACGGTAATGCGTTTT
>AT1G25260:220-360
ATGAGCCAAAATGACAATGCAGAAACATGCTCGGTGCTATTAACATTTATTAAAACATAATTGTGAAGTTAAACAAGATATAAATAAAAGTAACATATTAGGTTGACGTTGACACGTGCTAAGCATGCTTTGTGGCTTTT
>AT1G25260:415-490
TCATTATTGTCAGTAAGCAACATGCGTACGTAAAGCCAAATACACTTGGTAAAGATCCAAATGTGGAAGTTTTGG
>AT1G25260:625-705
CTGACCCAATTAAAATTTCACACACAAAAAAACCTCTAGAGAACGTTATGATACCCCAATTGAATGTCATATATTTTCCA
>AT1G25260:890-1025
AAAAATAAATATATTGCTTCAAGTACACTTCAATTTGAAAACAATAATATAGTGTATGCTTATAAATATTATCAAATCTTAATAAATAAATTGTCTTTTACCTTCCCAAATAAACTTCTCGTCCAAGAACAAAAC
>AT1G25260:1165-1315
CGTTTACATTGTTTAATTTCCGAGCATTCATATAAATAATTTATAATTCATTATTAAGAGGTTTAATAATATGATTTTGAAAGTACCACTTTTTAATTAATTTTTATAACATTAAATTTAAAACTTTAATTTCTTAACTTAAAAACTTTT
>AT1G25275:0-125
TCTACAAAGGTATTGAGATTCATATCTGGTCAACACACGTTGACTTACTCAAAGGCTCGCATACTGGTCGAGCCACTACGAACCACCACGTCTCAATCTTAGGGGTTCTTATGGTTCTTGGCAGT
>AT1G25275:250-315
GGCAAAAATAGGCAAGGAACTTGGAGGACTTTATTGGAACACAAGTTTGATGAATGGGGTGGGAA
>AT1G25275:820-875
AATAAGAATAACAAAGAACTGGACCTTGGCAATCTTTCATCAGTAAATAGAGATG
>AT1G25275:1000-1075
CCTTTGAAGTATATCTTTTTCAATTTTTAACGTTACTTCAATATTAAAACACAATTACAACTTGCTACTTAATTT
>AT1G25275:1170-1235
TATAGTTTTGAAGTGATTAATTCATCTTCACATATGTGGTTTTCATTTACCGTTTATTACTCTCT
>AT1G25360:55-190
AACTTTTCCGGACATGTCCAAATAATTCACCCACTACACAAACATAAATACATTATTCAACCAAGAAACAGAATAAGCCGGTTATGTGACAAATTATAGAGAATCAGAGCAATGGTAGATATGCCTCAAATAAAC
>AT1G25360:665-740
CCAATTTCTGACAAAATCAAGGAGCCATATACCAACCTTAGAGTTAACAATGTACTTGAGCAATGTAGGGCGATG
>AT1G25440:90-245
CAATCCAAAAAATTACTTGTTCATGTAAAATAATATGTGAGAATTAATGTTATACTTTGTAACCAAACTGATTAGCCTTCAATATTAGTGGATCCATAGTCATTAATTAATCGTAGTTTAGTGGTATTAACTCCATTTGAGTTTTTTTTTTTATT
>AT1G25440:405-495
AGTAGATTGGATGGAATGTGAATGCAAATTTATAATTCTAATCATATACTTAGGTTATAACCCTAAACAAATGTAATTTTGTTTTCATGA
>AT1G25440:870-1095
TATAATTAACTCTGTGTTGATAATAATATTTTCTATTGGACAAGACTAACCAATAGATAAATGAACCTGGCAACACATGGTGCACCAAAATAAGAATAATTAATAATAAATATTGTACCAATTTATCATTTATGATAAATCTCCACATTCATTTTCTTAAATTTATTTGTTTAATCAAATAATCAACCATTGTAGCTTAAAAACTTCTATCCAATCAAATCTTCC
>AT1G25440:1190-1280
CCAAAATTGGAGAAAAACTATTTAGCTAAAAAAATTATTTTATCCATAGTCAAAGTTAGTAGTTATTATATAGTCTCTAAAAAAATGGTG
>AT1G25550:0-80
GTTTGGAGGTGGTTCATCGAACGCCAAAACTAACAACAAGCTTAAGGTCGATCACGTAAAAAAAAATGAAAGTAACCAAT
>AT1G25550:560-610
TTATCCATAAGACCATAACTCAAAGAAACCATCACAAATGAATAATTATC
>AT1G25550:680-735
CACCTAGTTATAAGCTTTTACAATTGTCCTTAAAAATCCAAATTTAATTATTGAT
>AT1G26790:0-95
GTGTATGTTGTTGTTTTACGGAGATTGACACGAAACCTGAAATCAAAACGATCTAGAGGGTTGAGTCTTATTACCCCTAAATCTTCCCCTTTGTT
>AT1G26790:355-495
ATTAAATGTGTTATTATTTTTAATGCAAATTATCTTCTGGGATATACGTATAAATCTTTAGTTTGTAACGTAAAATACAATTACAAGCATACTAAATAAAATATATATTTAATGGTTTCTATATCATTATTCTTTGGCAA
>AT1G26790:515-685
GAATAATGCAATGTTAGTATGAAATGGTTTCTATATCATTATATTTAATTATTAACAACTATGCAATATTAGTTTGAAATTGTAACGTATGTGATACTAAATAAGTGCATGAATCACGCGAATAAATCAAATTATTTTGAAAAACTGTTAGAGCAAGATCTACCTTAAAC
>AT1G26790:820-885
TTTTTCTCCTATTAGATAAATAATATAGAGTAAGAGTAAAAATAAATGGTCCAACATGGTAAACA
>AT1G26800:145-210
AAAAGTCCTCTTGTTAACTTGGAACTCTGGAACGAGGCTCGGACTTACGGTGATGTTCAGCTAAT
>AT1G26800:375-440
CAGCCAAGTTCATCATGAAAACGGATGATGACGCCTTTGTTCGTGTAGATGAAGTGTTACTTTCT
>AT1G26800:640-690
ATATCCACCATGGGCGCATGGTCCAGGCTACATTGTATCTCGTGACATAG
>AT1G26800:995-1085
CAAGAAACCAAACGCTCTCTTTGCTGCCGCGAATGGTAAAACGTGAACGCACATATTTCAACCATTGCGTTTTGGTTCACGTGTCCTTCC
>AT1G26920:5-60
TAAAAAAAAAAACGAATTTTAAGTCCATAATTTCTTCAGAGTAATTAATTGGTTA
>AT1G26920:190-280
AATATTTGACTGGTATGGTAAGCATCCGATTCAAAAAATAATCAAAACGTCTGCTTCAAAAAAAAAAGATCATGTAAACAAATAATTGAA
>AT1G26920:330-420
CATTAAATTCTTTTTCAAGAGGTAGTACGTAAATTCTTTTAAACAAGTAATAGTGTTGCCTTTTTATACAAAACGTTAATTGGCATTGGG
>AT1G26920:490-580
AACTGGAAATTTGTTTTCAAAAACTTATTAAGGTAATGAACTTATAAATTTGGATGTTCTTCGAATTCTGTGTGTGTAAGTGTGTAACAA
>AT1G26920:855-935
TTTCTTTATCTTTTGTCTCTCCCTCTGACAATATTTAAAAATAAATAAAGATGAAAAAATGTGAGCATCCTTAAAAGTTT
>AT1G26920:980-1070
AAAAACGCAACATTTTTAAAAAATAGGTGCTCCCTTTGAAGTCCACTCAATATCCCTTTTTAGAATCTAGATATTTTTTGGACACTCAAT
>AT1G26920:1085-1270
TATGTGTATTTATTATTTAATTTTCTTTGTTTTTGAAATATTGATAAATTTATTGTATATTTTTCATATTAGATACAAATTTATCTGTAAATAAATCATCGCCATAAATTTTAAAGATTTGCCTGGCATCATGCGTTATGTGACAACTAACAACCAACAAAGGTTACATGCCGTAGGATCCATTC
>AT1G26920:1285-1345
ATCAGAAATTTTAAATTATTGACCAAATATTTTAGATTTCTTTCCGTGTAATGCGATAAT
>AT1G27045:20-345
ATTAGTAATTAGATTTTAAAGACATAAAAATGATAATTTAATCAAGACTCGATAAAAAAAAGTAAGCAATCTCGTGGAATTTTCTGAATAGTAGACTCACTAAGATCTAGTATTATTAAAGAATAGTAGATTTTCTGACATCTAATAATCAATAATACACTTCTTTAACTAAATAACAAAATTTTCTAGAAAAAGAGAGAGAGAATAAGGTTTTACAACGTAAGTGTGACAATGTATATTACAAATAGAGAATAGTTTTTCAGTCTGTTATCTGAATCTAGACGAGACAGCACATTTTTGGATTTTATTTATTTAAGAGGTTTAG
>AT1G27045:385-480
ACAAAAAAAAAAAAAATCCAAATTGACCAAAAGATATAAATCTAAACGTGTCATTACTCATTAGTGTGAACTGTGAAGACCTAATGGTTATATTA
>AT1G27045:525-635
CAAATGTCGAGCATTAATACTTTTTTGGCAAATGTCTCCATATATTAACTGTTCACTTTTTATATACATGCATGTAAATAAATGTTAAAATACCTCTGATAGTTTCACTT
>AT1G27045:625-775
AGTTTCACTTTCACCCAAGAAAGAATTACTTATAAGATTAAATTTAAATGTATATATATTATAAATTTCTATAAATCAAATAAACCTAAAGTTGTGATTGGCCCATTACAATACAGAAACCCCATTTAAGGACCCAAATATATCGTAGCC
>AT1G27045:900-995
GACTTAAGCAGAGGAAGGCTTCAAGGAGATCACAAAGCTCCACGAAAATTACGAAAAGAAGGAAATGTTATAAACAATGATGAGTTTAAAAAACA
>AT1G27045:995-1080
AAAGAGATGTTAAGATAGTTACCACTTTATATGTATACGAAGTGATAAATAAAATCTGATATGGCAGAATGGAGATTTTTCATTT
>AT1G27045:1190-1260
TACATATTTTTGGGATTGTCAAATTTATAATTTCTATTTGTTTCCGTCACATAGCATACAACCCAAACAA
>AT1G27210:30-130
TTCAAAAGATATTTTTGATTTAAGTATGCAAATATGTAACATATATTACCAAATAATTAGTCAATGAAACAGGATCAATGTTTGTAGGAGAATTGTTTGT
>AT1G27210:285-375
AAAAAAAGATACGAATTAAATTTTTAGCAGGGGGAGAGGAATTAATCAAGTCACGTGCTCGTCTGCCCAATTTGCCTGCTCTCTCCATTT
>AT1G27210:500-630
AAATCATATAATCACGTAATCGGATCATATATTCATCAATTAACAAATGTACTATCTCCATCCACTGTTTAATTAATACGAAATTAAATATGGTGGTTGTCATTTCTTACATCATGTAAACTTAAGTCAA
>AT1G27210:675-795
TAGCATCATTGATACTCTGAACAAGTCAAATGTCAAAGAGATTATTAAAACAGCATCATTACCAAAAACACAACATATTATTTCATTTCTTTTGTCTTAATCACTTTATTAATATATATA
>AT1G27210:925-995
TATTTGAACTTTCAAAATCATATATTATAACTTTCTTCTGTGAGATTTAACACGACATCCAAAAAAAAGG
>AT1G27210:1120-1305
TTTCATCTAACCAAATTAAATTTCCAATGGGACGAATAATGAACGCAAAAAATGTAGTAAAAAACACACATTTAATTCAGCAACTTAAATAAAATCTGCAAAAAAAAGTAAATTAAATGAAATATACAGATTTCGAATTATTTCGATTGTAAAAGAAATAGAGTAAATAAATGAAAGAGAATATT
>AT1G27210:1315-1385
AGTTAGAGTTTATCTACTTTTATTGTTGAAGAAAATATTGCAATAATGTTCTCTTTAAGACCAAAAATAT
>AT1G27730:165-335
ATACATCCAATTGCTTAATTAATATATGTATACATATTTCTTGACGCGTTATATAAAATCCGTATTATTGTCTTTATTTGGATAACGTGTTACCAAAAACTCCTTTAATTTATGACTTTTCAAATATACTACATTTAGATTATCAATAACTATAATAAAATTTAGAAGAA
>AT1G27730:325-410
TTTAGAAGAACTTACACAAAAAATTACTACAGAAAATATTTAAAAATAATAAATATCCCCGTTTGTTCAAGATGAAATTTTGTGA
>AT1G27730:655-780
AGAGCGCCGCGTGAAGAAGTCAAATGTCGTTGCTCTTTGTTTTAGTCAAATGTAGTTCGTCTCCCACATCTTACTGTCATAAATATAATATTAATCTATCACTAGTATAGTTGTACCAAAAATGT
>AT1G27770:295-350
GTTTAGAGTACGCGTTCATCTTCGTCTCGGAAGGGTACCGGTCTAGAGCAAAGAG
>AT1G27770:380-445
TTCAGTCGGAGCAACACTTGGACTACCTGCAATTAAAAGTCATATACTGTTGAGCAAACAGAAGT
>AT1G27770:1160-1225
CGTCAACTTAACCGATACGAACTGCTGCACGGTTTGGTTTATGCCATTATTAAGTTTTCCCAGGG
>AT1G27770:1305-1385
TTCGTCTACTTTTGTAAAAATTTCTTTAGAAAATATACTTAGTAAATTATTCTAATTTATTTGTGTGAAATTTCTAATGG
>AT1G27770:1380-1470
AATGGACAAAAGTCACAAAACTTAGAATATACTAAAAACTTTGTTGAAATAAAGTCCAAGTCAGTAAATAGCTTTGACTTTCTTGACCAG
>AT1G28330:0-60
TCAAATATGTCTAATTTAAGTAATAAAGTACCGATTTAAAAGGATCATGTTTTACACAAT
>AT1G28330:105-215
TTAAAGATATATATTTATTCCAAAAATGGAAGTCAAAATCAAAAAATAATTTAACATATATCATTTAGCTATGTAATTTAATAGAATTTGGGTTGTACATAACTACATAT
>AT1G28330:300-360
ATATAGGGCCTTCGTGGAAACCTTTTGTGCGACATATGGAAACCCATTAGGCTAGCGATG
>AT1G28330:425-520
AACAACACTGTAATTGTAATGACAATAGTTGGTGCCGACAAAAAATAATAATGACAATAGTTGGGCTTAGGTTTATAAGTTCATTTTTCTAAAAG
>AT1G28370:0-145
TGTGACGGCAAATTTTATTGGAATATATAAATAAACATATTAAATTTTAAATTTAACATAATACTATATATAACGATATTATTATATTTTCAGCTTATTAAAATAGTTATAAATTTTTAAATGGTTAGATTTATATTTACTGTGT
>AT1G28370:155-270
GTTAACATATCATTCATAAATATGATGTAAAAATATATGATTGTATTAAAATTTGAAATATTTTCTCTCGTGACAGCTTGCCAACTATCAATAATTAGGAAGATAAGTAATTGTA
>AT1G28370:295-395
CAATACATGATAAATTTTTAATACTTAAAGATATATATAATTTCATTTAATAATAATTATTTCAATTGATAATTAAATAATAACACATGTCATATGTTTG
>AT1G28370:455-545
TATTTGAGGATAAAATTTGTTTGAAATAATTACTATGTTGATAAATTTATGATATTTATAAGAACATTAGGAAAGTTTCTTTTTGAAAAT
>AT1G28370:565-710
TATCAAATCATACACTTAAAATTATCTCTTTTAAAAACCAGATTTAAAAAATAATAATTAGATGAAAATATAGTTTTTTTTGTCAGAAATATAAATTATAATTTGAGAATGTCATTAACGAATCATTTCTAGTAATAATAAATAT
>AT1G28370:925-1015
ATAGCAAAATATAAATTGTTTCCATGCAAAGCCTAAAATTAAAAACGGTAGACCCATATAAACTCAATAATAACTACTACTTTTTATCCT
>AT1G28395:0-195
AACAACAACTACAACTACAAGTACGATGAAAACGTTAAGGAAGAGTCTTTCCCCGAGAACAATGAAGACAACAAGAAAAACGTCTACAACTCTAACGCTTACGGGACAGAGTTAGAACGTGAAACACCGTACAAAGGTTACAGCCACAACTTGGAGAGACAAGGCATGAGTGACACAAGGTTCATGGAGAAAGGT
>AT1G28395:500-570
CTTTCTTTTATTTCAAACTAAGTTATATTACTTATCGTTGTTTAGTCAAACTAAATCGTTGTTATCATTG
>AT1G28395:755-885
ATTTAATCACTTTTTGGTTATATTGTAAAAGATAATTTAGATAAAGACTGTATGGATCTCCCATTATTAAAATGGGACCAAACGTGACTGCTTACAATGATTTATAATGGGGGACATGAAGATGCCTCTT
>AT1G28395:895-1000
TAAGTGCAAAAGAGAAAGTAATAATTACTTGCACAACAACTATTTAATCTTATGGATCTAGAAACATATATTACTCCACTTGATTAAATCGAAATGTTGTCGAAG
>AT1G28395:1185-1250
GGTGGTAATATGGGTGGAAAAGACTAACAGAAACGCCGGGACAAGTAAAAGACAACGACACTTCC
>AT1G28395:1380-1465
TTTTCTAAAATATATTTTAAAATCATTACATGAATATTAATATATTACCACCATGCCGAGAAACTATTTTAATTTATTTACCTTT
>AT1G28670:440-500
AAACCACTGTATATTATACTCCTAGCTTAGTTTAATTTATGAGATTTAAGTGGAATTCAT
>AT1G28670:550-610
TCGAATAGGATTATTAAAGAGATACTATAAAGGAGCAATTGGTGCCGACAAAAAAAAATA
>AT1G28670:705-785
AAAAAAAATTTGTTTATTTCTAAATTAAAATATCATTTATTATTTAATCAACTACAATCTAAAAAATAAAAATCATCAAA
>AT1G28670:825-880
ACATCATTTATTAAAGAATAAAAATATAAAGCTTAAAACATCATTTATAAAAGAA
>AT1G28670:1010-1190
GCAACGTCATTATTATTGATTTCGATTCGTCCATCTGTGGAATAATACGAATATCATTATTAGAGTATTTACTAATCAAATATAAAATTATGTAGACTATAACGAATCATTTTTTTCTTCTTCCAAATAGGTAAATACTCTAAGAAAGATATTCATATTATTCCAAAATGAATGATAGCT
>AT1G29320:200-290
GTCTTGCATATTTGATCACAGCTCCGGCAAGGTAATTCACAAGTAACGTGTGTCCCCATCAATATAACAATACTTGATTTCCAGTTCTCT
>AT1G29320:440-530
AGCAGCTAAAGGTAATAATCCCTAAACCTTTTCTCCATTGCTAAATAATTTAAACATTTCGACATGGAAAGTGAATTTATTTGTAAAATA
>AT1G29450:730-805
CTTTCAAGAAAAATGATGCAGCGGGAGTAAAACGCCTTTCACTACGAATTACCTTACATCAAGTTTCTCATAGAC
>AT1G29450:995-1050
ATCTTTGTGACAAACATTTGATTTAGCCGATGGACCCCTTATGCTAACAAACAAA
>AT1G29450:1210-1300
AGAAGTTGTATAGTCCACAAGTTGATTTGCAGACATAGTTTATTAATAAGTTGAGACCCTTAGGAACCGTTGAAGTTTCTGCAGGTTAAG
>AT1G29450:1440-1500
GTTTTAATCCACAAGTTGATTTGAAATAAGATTGATTGCTAACTTGGGACCCTTATGATC
>AT1G29460:55-120
TCCAGATAGTCCAATAAGCACTTGGGCGGACTCTGACAATCCAGTAAATACCAATGTAAATCCCA
>AT1G29460:200-260
AGATTGGGATTGAGTCAAAGAGTCTTCATAAGATCAAACTAAAGTCAAACACAGAGGATG
>AT1G29460:405-475
CTGAAATCACTTTCTGCCTAAGAAAAACGAAATGTCCAAACACAATTATCAAACTTTGGACATCAGATAC
>AT1G29460:495-585
TAACACAAACAATAATTCCAAAAAAGAAAAACTGCAATCTCAGCCGAAAGATGGTGATCTAGTGATTATAATAATCATTGTATAATCATT
>AT1G29510:985-1060
TATGAATCTTTTGGAAGTGTAATACAAGACTGAGAAAGAACTAATACGAACACGGTATCTTTTCTGATCCAAGCT
>AT1G29510:1390-1450
CATGTTTTCTTCAATAATGTCTCAGTACCTAACTCTTGTCATATAAACGTCCGTATAGGA
>AT1G29670:0-60
TTCTTTCATACGTAATATTACATTCTCCACCGGGCTAAATAAACCAAGCCCAAAAGTTAT
>AT1G29670:205-295
TTAAATATAATTTTTTTTTTTTTTTTTCTTGTCGTCTACTCAAAATTTAATTCACCTTGTTTTGTTTCGTTAATTAATTTAGGTTGTTGT
>AT1G29670:565-645
CCAAAGCCTAACATCAGCAAGTATTCAAAACATATTAACGACGAAATTATCTGTCAATCGATGACTAGAATGATTTAGTG
>AT1G29670:765-880
GGAACATGGAAGCAGCACCGGCCTTGTTCAATTATGATACAAACAAGTCGTTGATTTATTCACAAAATATCCACTATACCTTTCATTTATTGCCCAAACCTAATTCTTCACCTGT
>AT1G29880:65-125
GAAGACCTCCTTCCATTAAAACTGTTCCTTCATCCTCTTTGTTCGTCACCATTTCCAGTT
>AT1G29880:395-470
ACAATAACAGTAATCCAAAAAAACCCACGAAAGTTGTGTTCTTTCAGCCGAATACAAAATGTAAATCTACGCAAC
>AT1G29910:15-105
GAGACTTTCAGATGTAAATTTGCAAAGACTTTGTATGATTTGTCATTAATCAAATAACTCATTGTTCTCTAAATATGTTTCGTAGAACTA
>AT1G29910:140-220
CGTTGTAGAGGCTATTTCTACAATCGAGCAACGTGATTGAACATATTAAGGCAATGGGTACAAAGATTATGTTCTTTTCA
>AT1G29910:260-310
ACACGAAAGAGTCTTTTATATAAGTTTTTTATATTCCCTTGATTTAACTT
>AT1G29910:455-590
ACGATATCTGGATAACAATATATCACATTGCTCTGATACCATATTAAAATCACATCCACGCATTGAATGGACTGATCATATATCTTACATATTAGTTAAAATCCATTGTCGTGCGAGAGATTGCCTTCCGTGACA
>AT1G29910:855-915
TTTTACTGTCGAAATTATTTAGGGTGATGAAAAAATCAGTAAACTACGAATGATAGCTTA
>AT1G29910:1205-1295
CAAAATATGCAAATAATCAGTGTTTTTGAGTCTTTGCATTTTGATTTAAAAGCAAAAACAACTGAGTTTCAAGGTTAAATTAATTACATT
>AT1G29940:0-50
CGAATAATAAATTATTATGTTTTGACACACCAAAGCCTAGCTACATGTAC
>AT1G29940:105-195
GATGTCCAGCGTTAATGCGTTATACCCTTCTAGAGATCTAATTGGTGACACAAAATCTCACGTAGTGTAAGTCAGCAGAATGAATGCGTT
>AT1G29940:755-845
CAACTCACGACTCACGCAAAATATACTTACCCTTCTCCTATCGTAAATACTGTCCGACTAGTCACATAACATTTTTCAAACTTGCACGTC
>AT1G30040:60-155
TATCCTACATTTGAATATTATATAAGAGAAATTGGTGGAAAATTATACGAAATTTAAATTTATTGTAAGTACTATTATTATTTGGTAATCGGAAG
>AT1G30040:150-240
GGAAGTTCTGATCCATAGGCATCATGTAAATACTACAATAGTTAAATACGACCACATCAAAACCAAATCCTAGGAAACACATGAGGTTAT
>AT1G30040:335-425
AATAAAGATTACATTATGTATCAGAAATAATCGTTAATACATGTAACAATGAATTATTTGTTTCGAGTGCAAGGTTTATTTATCATGATT
>AT1G30040:420-510
TGATTCACAGTATATCTAAAATAATAATTTTTTTGTTTAGATATATTAAGAGCTCCCTCTGGCAGTTTGATTTAAACCTAGAATTTGTAA
>AT1G30040:540-725
TAAAACGGTAAAAATATATATTTCAACCCGAATGTTCAAAATAAAATTATATATGTATATATATTCCCAACCCTACATGCACTTAGATATTATTGAACAAATAAATTAAATAGAGTAAACAAAAGTTAATTACTGCGCGTCGGAGAGAAGCCTTGGCGTCCAAGTCTTACCACCGAAAATATGTC
>AT1G30040:720-840
ATGTCGACTTCCCATTTGCTTTAACTTAATTTGATAATATTATAAATATACTAACATTTTACTGACTCGAATACAATAATAGTGATTCCAGTAAATTATTAACTAATAAAGAATGGCAAT
>AT1G30040:945-1035
CCTGTTCAAGTTTAACTATTTCTAGTAGCACGTTAGAAAAGAGCTAAATATAGAAGACTTTATCGATGGGTTTTATCTTCAACAATATCT
>AT1G30070:60-230
TTCTTCAAAATTCAGGGAACAAAAAAATACGAGGATTTTGTAAAATTATGGTTTTCTTCTTGCATTTAAGTTGTAAAATTCATAAAACTCAAACTCTCATCCGATAACAATGCGCTTGATATAACAACGGCTTTTTGATAAGTAAGTTTAACATTCATTAAAAATAATTA
>AT1G30070:270-355
AAAAGTTTCTTAAAAAGTAACGTTTTGGATGTTACATTTAAATAACGCCACCATTTGGATCTGAATTTGTTTTGTTACTTTTGTT
>AT1G30070:480-560
TTAACTTAACGTTCCCCCTCCCCCCAATCAATAATTATTTAGACCACACCATCATATGAAAAAGAGAGTGCTCAGTTTAT
>AT1G30070:630-685
ATTTGGTAACGTCCAATTCAAAAGAATTTCATTAACTATAATTAATATATCAAAA
>AT1G30070:700-775
TTTTGTTGATGTATACATGATTGAATGAATTATTCGTAAGAGAGACAAGTTAAGGTCATGTTAGTTATACAAAGA
>AT1G30070:805-880
ATGGATACCTTTGGCTCAGATATAATATCAATTATCATGACTTTATAATGCAAGAATAAAAATCGTTAGATTTCT
>AT1G30070:1050-1140
TTTTTCGGGGCTCGAGGAATGAGTTGAAATTGTTGATTATCACTATCCACATTTATCCAAAGTTATACTTAAGCATATAAAAATGAGAAA
>AT1G30070:1155-1215
GGTAAAGTAGGACGTAACTCGAAGATCCTTTTAAATGGAAAAAAATAATAGAATCTAAAA
>AT1G30410:235-325
GGGAAACATGATAAAGAGATTGAAGACTCTCTAAACCAAAGTGACATCTCTAGAGAGCGTTGGTGGCCATCTCTTTACAAAATGGTCGAA
>AT1G30410:350-440
ATACGAGTATACGACATAAAGAATTGTTGAAGTTTCTTGATCTAATAATTTGTGTATATACTCTCAGGGCTTGCCGTGATGAGCAGATTG
>AT1G30410:560-640
GGAACTTTTATTTGTATTGCTTGGGATACACGTAACAAAATGCCCATTAATCGTGGTGTAACTATATAGGCTATGCTTCT
>AT1G30530:765-935
GCGTGTTTCTCTTGGTTGTTGTAATTGTAAATTAATTTTAATATAAATATGGTTGCACAGAACAAAAAAAGAACAATAATAAAGTGGATTCAAACCTAAATGTATATTATTTGATTTTTCCAACGTGAAAAGAATGCATGACCGTACAATAATCAGGAACCACTAATTTT
>AT1G30530:960-1050
TATTACTTTACTGATGGGATGGGATGGGACCATAAATAATTCATATTACATTTATGATCATCAGCAGAGATTGAGACTCTCAAAGCATCA
>AT1G30900:310-400
TCCTGAAAGTAACACTTCTATCACTTGGTAGTGGAGAGGCACCATTACTAGATATTGTGGCATACGGAGGGTATGCTTTTGCTGGTCTGT
>AT1G30900:400-465
GTCTTGCGGGCTTTGCCAAAATAATGTGGGGATACTCGTACTACGCGTTGATGCCATGGACTTGT
>AT1G30900:900-1035
AACCAATGAGACAATTTAAATTATGGATTGACATGTAATCATTAATCAAAATCATTGTTCACTGAATATAATAATTTTCTCTCATCCCACAAGTAGAAGATATAAATATTTAGTACTAACTATAATTCATTCTAA
>AT1G31173:85-145
GTGGTGTTTTTATGCGTGGAAATATGATTGTTTTCATAAGTAAAATAATATATCAATTTT
>AT1G31173:445-540
TCATCCATCTTTTTCGTTTCTAGAAAAATATCTTAATATAGTTACGTAAATATTTAGTGGTGGTATGTATAATTATGGCCCGCTTATTCAATTGA
>AT1G31173:950-1000
GATTTAATTTAGCTAAAAATGAAAAAAATTGAGTGTCAAAAACATTAATA
>AT1G31173:1080-1140
ATTAAGAAATATTAATATATAGATTAACCGATATTTTTAAACTATAACAAAATATCATGA
>AT1G31330:55-180
GACTAATGTGATTATAAAAACTAGAAGAAATCGTATGGATGGGCCGACCAAAAAAAAAGATGACCGTTGAGATTTAAACGTTAAGCTTTAAAGCTTTACAAGACATAAACGTTGCGGACAGAATC
>AT1G31330:725-850
TTCTATAAGAAACATCTAGAAAAGAAAAAAAAGGAAAAAAAACATCTAGAAATATATCAGAACTTCTTTCACAAAAGAATAATATATATCAGAACTGCGTGTTATTAATTCAACGAGTTCAAACT
>AT1G31540:255-330
TTTACACCAATTGCGATAATGTAATGACTTAGCTTCTTCATAGTCAAATCTCTTGTTGTTTAGCATATGATTCGA
>AT1G31540:470-525
GAACCAAGACTAAGCAATGCATGATTTATTTTATTTTTGATTAAATAAATCTTAA
>AT1G31540:715-835
TCTCACCTTTTTTAAAATGGTAAAATAACACCTATGATTATTAAATTAATTTAAAATAAGACAAAATAAATATAAATAATAAAAATAATTTGGTTTAAGATTTATTTTCCTAAAATTTCA
>AT1G31540:860-915
ATAAAATTAAATATGCTAAGCTATAAACTAATTTTAGTTTACATAACGATTTGTA
>AT1G31540:955-1130
AACTAAATACTGGAAAAGAAATCGAACTCGAATTTGAAATAGATAAATACAAACTAAATTGTTTTATTTATGTTTCAAAATAATAGTTTATTTGATATTTATTTGGTTTGATAATATTAGATGTTATATTACCATTTTTTAAAAGGTGAGGGTTTAAATACCAAAATAAAAGTTG
>AT1G31660:135-230
ATAGTTGAAAACTTTTAAACTAATTTGATTAAAGTGCTAATCTAATTTAATTAATTCTACAATTAATCCAACTCTGGGTCACGCCTATTTCCTTT
>AT1G31660:260-385
AAGCATTGTTAGAATAATCCAACTTGAATACATACGCATACCACGAAAGTAAGCAAATAAGTTTATACTAGATGAACGGTAAATAAAGGATTAATGAGATTGTATTTTTGAATGTATTCAATCGG
>AT1G31660:705-830
TCTATATGATATGTTTTTTTTTACTTTATGATAAATGGGTAATATTAATAATGACATACATGTTTTTTTAATAATAATAATATATTTTTCATCATGATTAGTGAAATATTAGTAGAAACCGATGT
>AT1G31660:885-965
AAAAAATTTGTCCAGTATTCTTCATCCTATAAACATAAATTGAAACGAATTCAAGATTTTATATCTTGCTCTCCCTTCAA
>AT1G31660:965-1060
ACTCCTCCAATGTCCATAGAATTTTTGATAAATTGGAAGAAAAACGGCTATCCATATATCGTATATTATCCATAGATTTTAATATTTTATATCTT
>AT1G31660:1180-1300
AAGAAAAAATAGTTTCAAATAGGTCCCCAAACAAATTATTTTTATTAAAAAAGCCCCCAAAAATTTGAAACGTTTTATAATAACCTTAAAAAAATTATTTTGTTGCTTTGGTCCCCAAGT
>AT1G32920:285-345
ATATATATTTGATAAATCACATGATTTTATCTTCAAGCAGATCAAAACGAAACACAAAAA
>AT1G32920:745-850
CCAAGATTAGGCTGATCAGCTTCTCTATCTTCAGCGCGTGTCTTCCACGCTCAACATACATTTATGATTTATCTCCTCTTTTTTTGGCTTGGATAATTATACCGA
>AT1G32920:905-985
AATTTAGAACCCCATATTGTTACATGAACTGAACGCAGTGTTCGTCACTTCCAAACCAAACTGATCCAAAGGTTTGAATT
>AT1G32920:1045-1130
ACCGAACCTAACCGAAGTTCTCAATTTCCACCCTTAATAATTTTTATAATCACAAATATTTTTTTAATGAAAAGCCACCGCTATT
>AT1G32920:1125-1230
CTATTTCTTTTGAAAGTTTCAACTAGATAGATTACACGTAAAGAAACGAATTCTATAACTTGGTTGGATTGATTCTCTTCTAGAACTTTCAAAACTTTTCGGTGA
>AT1G33170:750-985
TAGTATCTAATCCGTATGTCAATGGGTTAGAAGTGATAAATTCCATTATGTATATATAGTAAATACTAAATACAACAATATCACTTTAAAAAATCCAAAACTATATATTTAAAACGGAATTCTCTTGAGGAAAAAAATAAATGGAATTCTCTTTTAGTGTTTGATATATACAAATTAATAGGATTGGTAATAATCCCCCTTGATATGAATACAACAGAAAAGACTAACAATCAGT
>AT1G33170:1110-1190
AATGCTTATCAAACACCCACAAACCATCTCTCTAGATATTCACGTATGTTTAGATAAAAGTATCTCTTGATACATGAATA
>AT1G33590:45-235
ACACGTATACTAAGAACCACAGAAATTAACTCAATTCGATACAAGTGAATCACATAAATAGTCAAGTTCCATTGGATACAAGTGAAAAGTCACAGAAATAGTCAACTTCTAATCGATACAAGTCAATAGTCACTGAAAATAGTCAAGTTCTAATCAATACAAGTGAATACAAGCTATCAAAGCTATTTGA
>AT1G33590:625-675
AACACGAACAGAGACGGGAGAGAGACAGACAGCTGAAGAACACGAACACA
>AT1G33590:835-885
TACTATATTAGGTAGCGGTTTTTGTAAATTAGTGCTATCGAATAATAACC
>AT1G33590:910-1070
TCATTTTATTTCCCGGGGTAAGATAGTATAACGTTTTGAAAACCAAACGTTATAACGTTTTAGCTGGTTAGTAAATTATAGCAGAACACGATTAACTGCTACAATATAATATTATAAATGCTCAATATTCTTCTAGTAATTTTAATATTAATAAGGAGGT
>AT1G33590:1240-1330
AAATACTATGACTTACTGGAGTTTCAAAATATAACCAAAAAAAACGAAAATATATTATAAGAAGTCTGAAAAAAGTAGAATTTTGTTTTT
>AT1G33720:250-320
AGTTTGGGAGAGAGCCAATCGAGATTTAAGACATTCGGTTCCAAATAATGGTAATTCATGTCTTGGACGA
>AT1G33720:885-935
CTTCCACGAAGATGTGATCGCTTGAATATGACACAACATAACACGTAACT
>AT1G33720:1060-1125
ATCCGACAACTTTTCTGACAAGTTTCCAACAAATAGTTGTCATTAATTTCAGACGAATTCTCCTT
>AT1G33720:1215-1355
ACTACATTAATGTTTATTGGTGATAAAAATTTCGACAACATTTTAAATAAATAAGATAACAAAATTTTAGTGTCAAAGTAGATACGTACAGTAAATAATTGTTTTGTCATTTATATAAAAAAGGAATATAGAAATAGTAT
>AT1G33960:0-50
ACAATTATTTTTGATTAAAGATATTAGGAACAATCTGTTACACCAATTGT
>AT1G33960:160-210
TTCGCACGAAGCTTTATCTACTTTGTCGGAAACATATCAACTAATTATAG
>AT1G33960:885-960
GTCAATCTTCTCACTTAACTTTATCTCCATTATCGAAAACATATCCATGGCTAGTTTTATTCGTACATTGAAGAT
>AT1G33960:955-1220
AAGATTCACGATAGATGACTCTACCTATCCTACGTTATTTTTAATAATTTAAAATACTGATTTTAGATTAGTTACTAATATTTTTATACGAAATTTTATGTTTAAATAATTTAATGAATTAAATTCATTTTTATATTGACGGTAAAATAAATACGAGAGATATGTCCAAAAGATTTAAATTTATGTTAAAATATGAAACTACTACTATAACTTATATTTATAACATATATATCTACCATGAATTTATAAATTTGATTCATAAAAT
>AT1G34750:5-155
GAGAACATATTAACAAAATGAAAAACACATATATATATAAGATATAAATATACAATTAATTAAAAATAACCAAACAAAGATCTATATTAATGCATTTAATTTAAATTATTCTTTCTTAAATTATATAAAAAAAGAAACATATGAAATAGA
>AT1G34750:165-255
TATATTGCCTAAATAAATGGTTTCTTATATTGTTTCCATCTAATTATGAACATCACATTTAATTATTTGAAGATGGAATGATTATATTTT
>AT1G34750:280-425
ATATATATATTACAAGTTAATTTATCGAATAGATATGTTTTTATAATTAAAAATATTTATAAAATTAAATTGAATAAAATTCTATGTGCATGTATAAATTAATCCTATATTTATTTGAGAAGGATTGTATAAATTTTAGCCTATT
>AT1G34750:460-525
TAAAATGAAGAAAAAATAAATTTTCAGATAAAAATTCAATGCATTTAGAAGAAATCTCTATATGT
>AT1G34750:560-620
ATGGTATGTATATTTAATATTTGTACATATTTGGTTATTTTTAATTAATTGCATACGTAT
>AT1G34750:620-820
ATGTTATATAGATCCGTTTGCAATCTGTACTAGAATAATATCGTGGCCCCAATGGTTGAGTGCATCTGAGGAAAACAATACGTATCTGGATCGACGTCGTTATTTTATTTTAGATTTTCGTGGACTCACAATCGTTATTTTATTTTAGATTTTCAAACGACGTCGTTTCGTCTGTAACAGAACATATTAAACGGAAAATT
>AT1G34750:855-950
ACATGTCTAAAATGGCGAAGTCAACGAAACTTTACTATTTTATTAAAAGTCAAACAAAACTTTACGATTTTAGTGGCATTTTTGAAGTTCATGTT
>AT1G34750:1000-1120
CTATATTTCACAAGTTATTTTTAATTAGTTTTGTGTATATATATAAATATTTCAGTTTACAATAATATCAAAACGTTATCGTAGCATATTTGGTTGAGCGCTTGTAATAATTCTGGAGAG
>AT1G34760:95-240
ACACTTCCAACGGCAATTCACTAACAAGCACATACGATTTCGAGTCAACAGAACCTAAAAATTGAACGAAAACAAACATTTAGCTATATCGCCGAGACGCGGTGCAGCCGCTTCTTAATAAACAAATGCCAAAATCTTACTCTGT
>AT1G34760:340-430
TAATCACGTGTGTAGCGAGATTTCGTTGACGATAGTTCTTAGTAACAATCTGAGTCAAATCTTCTCTTTTAATTGGAGTTCCTGAGCTTT
>AT1G34760:880-940
TGGTTTATATAAATAATGGTATCAAACTAAAATAGATAATTTGGTTGAATTTTGATTTTG
>AT1G35140:140-200
CCGCTCTGACATTAATGGCTTACTTCAGAAACTTGAGCTGGAGAATAAATATTCAATTAA
>AT1G35140:455-545
CAATGCATAATAGAAAGTAAATGTAGAATAATTATGATACTATTTATAATCATAATATAAATTGGACGATATAATTTTATATAACTATTC
>AT1G35140:890-1090
CTGTTTCAACTCCTCATTTGTTTTCATATTTTGAATAAATTAAATAATTAAATTAAATAAAAAATATTATATTAAATTTTAAAGATACATTTATCAGTAGTTAACTAATGCAAATGCTCTTCGCCACATAAATCTTGCACTTTCTCCAGCTATATATACCGCCAAAAAAAATATAGACATTTTATTCATATATTAGTCCA
>AT1G35210:40-130
ATCATATCATCCATAAAATATAAAAATAAATAGATTTTCAGACTTAGGTAATATATATTCTTAAAAAAAATAATTCAACAAAAGTTTTAA
>AT1G35210:145-315
AAATTTATATTCGATTTCGTAGAATTGTTTTTTGAAATAATATTATATACCACCATAATAAAAAAAAAAAATTTTGAACATTTATAAATATTGTAATTTAATATTTTTAAAGAATATCACAATTATTTAATAAATCAAAATTTGAAAAATTGTTAGTACTCTAATTTGAT
>AT1G35210:300-430
GTACTCTAATTTGATTTTTTAAAATAGATATATTTAAAATATTTATAACAGGTGACATATTTTTTTCGTCGAAAAGATAATTTTATTAATTTAAAACGTCATGATACAATTGTTCACTGGGCCATAATTG
>AT1G35210:440-500
CAATCAGAAAAATAACAAGTAGATCGACATCCCCTTTTAGCTAACAAGTGTGCTGCCTTA
>AT1G35210:610-765
CATATCAATCAGAAATTCACAATTAAACATGTTAAATATAATATATTATATGATAAAACAAGTTATAATGTTTATAATAAACGGTGGGTTAAAATTAGATGTGATGATTTAAATAAGGATTGCAACCTCTAAATATTTAAAATTTTGATTTTGTA
>AT1G35210:795-900
AAAATACGGTTTCTATGTACGGGCTGAATTTTGTATTATTATATACCAAATATATGTTTATAATATATTCGATTATGCTAAATTATGTAATTAGCTCAAACAAAC
>AT1G35210:960-1050
TAATAGCTAAGTTCCTTAATTAATATATTTTAGATATGGTTCATTTATAATATGTTGACTTTTGATCTAACATAATTATATGCAATCTTA
>AT1G35210:1100-1190
TTTTTAACAAAAATATAGAAATAAAAATTAAACAAAACTAAAATTTAACCCATGTTTATCCTACCAAATTATTCAGGTATGAAAATACAC
>AT1G35230:20-100
TTCACTCTTGTTTTTACTGAAGCCTAACTGCCTAAATAGTTGACCACAAACATTGTATCGACGATACTAGAGTAACATTT
>AT1G35230:95-185
CATTTGGTTCAAAATGTGTTGTTGAAATCGTTTTCGAAGAGACGTATTAACGACCTAAAGTAATGTATAAAAACTTGAGTTGAAAAGTCG
>AT1G35230:320-445
TGCAATAACAACAAAGGCATTAGTTGCATACAATACAATGTTCAAATTATGCATTGAAAATTTGAAACAAATATACGTTAAATAGAACAGAGATCTTCTAAGAATAGTTGCAAGCCTTTAAATAC
>AT1G35230:630-720
TCATTATTTTCTTAACCAATAGAATATAGGAAATAATAGGATAAATCTATATTAGTGGACAGGTAATAGAATGCTTTCATTCACATTGAA
>AT1G35230:760-875
AAGGCAAAAAGAAATGGCCACGCAATAAAATCATTAGGGTAAGTTGAATTTTGGTCCATAATATTATAAATTAATTTAATCTCGAAAGCTTAATCTTATGATCTCATGTGATCTT
>AT1G35230:920-1030
AAAGAAAAAAAAAGTCTGCCAGCTTTGGAACGCCGCCCATTCCTCTAGACTTTCTTGGAAACAACGCGTTGTTCTTGTTGGGGTCGACGAAGACTCACTAAATCCATCCG
>AT1G35710:85-225
AACATCAATGAATCATTATTCTGTCCACTTTAAACTAGAGTTAACAAAATCTTTGTGTTCTCTTTATTGGTCTAGAATTGGTTTACTTTAGCATTTACTTGCATATCATTGATGTCTCAAAGTCAATAAAATCATTACTT
>AT1G35710:235-355
GATTGCTAATCAATGTATATGATTCACGTATATGTCTCAAAGTCAATAAAATCATGTCTCAAAGAATATGATTCACGTATTCTCTTGTAGCATTTACTTGTTGTATCTTTAATATGATTC
>AT1G35710:510-630
TGTATAAGACTATGTTTTAAAAATGTTATGGATGTAACTATATTTAAATTACATTTCTTTGATTCAAAATATAATTATACAAATTTATAAAAATAAAATAAGAATTCAGTTAAAACTAAC
>AT1G35710:640-790
CGAAACGAACATAGACACTTGCGGCAGCGACAGCGGCATGAAAACGAACATGCACACAAGTTGCGTCAGCGGCAGCGGTAATGGCTGCAGTAGTGGCGACGAAACGAACAATAATCTGCAGTAGAGTTTGCCGCCGCCGCTACCGTCTGC
>AT1G35710:780-845
TACCGTCTGCGGTGGTGAAACGAACAGACTAATATATAAAAACATATACTAAGCAAAAAACAAAC
>AT1G35710:1005-1095
ATCGTTAATAATTGTCGTTGTGTTGTTCGTTTGACTGTCGCTCTAGACAGTCGCTATATGTTTAAAAAATTTAATTATTTTTTGTGCTAA
>AT1G35710:1135-1280
GAAAAAATATAAATTAATATATTTATTTACTTTAGTTTTATCAAATTTAATTTGACTACAATTAATTTACGTTATTTGAATTTAATTTATTTTAATTTAATTTAATAAGAATTAGTTTAATTTAACTAGAACTCAAACCCATCGT
>AT1G36622:10-85
GATGCCTATACCACTTGACACTTCACGACCACTCCAGTAGAAATAACAAACACAGAAACAAGACACTCGCGAGTT
>AT1G36622:100-190
TGATGATCTTGAACATCTCGTGGCTGTATTTTCAGCAAGCAATCCATTAGAATCTTTAGGAGTTACAAGTGGTAATTTTGTAGGAAGAAT
>AT1G36622:245-495
TTAATTTGTCAACTGATCGAACTGGTTGGAACGCGTTTTCGAATTTAAATAATTTTTAGAATAAAGATAATGTACAACATACTGAAAAGATATTACAAACGCAACAAGATGAGAAGTCAACAAATATATATGTTGGATCTAAATCTTTAGAAAATAAATGGTAAAATATTAGAAAAACCTTGCTCTTGAGAACGCAATACGACTCACGTGTTGTCGGTCCAGTGATAAATCTTTCAGGTAGAGGTGCTGA
>AT1G36622:540-660
GCCTCTAGAAGATGTAGGACCTTTGGACTTGAATTTCTGAATATTAAAAAAAAGAAAATGCAATATGAAAAATAATTGTCGGATACGTAAAATTTTGTCGTTCACATAATCATAAAGCGG
>AT1G36622:760-845
CGGATGGTCCGACGATATGGTATTCAAAACATTTGTTATAAATTTATAAGTGTGTGTTTGTCTATTGTACAGTCCTTTGAGATAT
>AT1G36622:835-920
TTTGAGATATTTAGTGTCTGCAATGATCAAGGTTTCTTATAAATAAATAATGATCAAGTACCAAAAAGAAAATTCGTTTTACATA
>AT1G36622:1035-1125
CTCCATTTATGTTCAAGTGGAATCTTAGATATGCCCAACCCTACACAAGTCTTCAAACCGAGTTTCCAAGGTAATGTATTCAATAACGAA
>AT1G42990:260-350
TTAAGTACTTTTTGAAAAAGTGTAATTATTCACACAATCTTGAAATAATTTTCATCGTAAAACAATTTAATAGATGTTAATGTTGGAAAT
>AT1G42990:380-470
TCTGTATACTCCTCATCCTCTGTATTATATTATTTAGATAGAGATTAATGATAATAAGCTACCAAACCATTAGCTAATTCACTATAGTAA
>AT1G42990:540-720
AGTAAAATATATTTATTCTTTAAAATACATATAATAACAAAAATAAATTTAGAATTGATACAATTAAAGATAAATAATTAATAATAAATGTAAATCTTACATTAATTATTGAATGAACACATAGAAAATAATTAAATAATAACGTGACATTCATATGAAAATAGTAGATCAACTTTCACA
>AT1G42990:760-995
TTACAAATTCATTCATGTGAGATTGAATGAAGATTAATCACTCATTTAAAATTGAATAAGGAAGATAATCCAGAATGTAACATAAATTGACAATATAATATATGATTTTAATTAACAAATTGATAACTTTCAAAGTCTAGAAGATGGTCACGAAGGAAGAAAAGTCCTCTCGGAGAACAAAGATTCAATCGTGGAAGATGTTGACGGTGACAAAGAGAAAAAGGGACTGAAGAAT
>AT1G42990:1125-1215
AAACCAAGAGAAAAGAAGTGAATTAGAACCGAGTTATTAATCACACGAACACTTCACTGAGTACACGTGTTCGGCTGTGATCCTATTCTT
>AT1G42990:1220-1295
TTGAAGCCTTCTCATTGGTTGTGTGACGGCACATAAAAACAATAATCCTCTGCTAACAGAAACACTATAACACAG
>AT1G42990:1290-1395
CACAGTACACTCCATCACATCATTGGCTAAAAATTCAAAAAACGCGTCCATAATCAACACGTGTCATGCTGACTCTTTTTCTACACATTTACTTGGTCGCAAAGA
>AT1G43910:15-90
ATTATTGGTGAGCTTTTTTTTTCCAAATATTACCAACTCGATAAATCGCTAGTTTTAGCTATAAAACAAGACCAA
>AT1G43910:100-155
AGAAAGTGATATACAGGTCCGACCGACCAATCTGGATCGGCTTTTATAACTTTGG
>AT1G43910:190-265
GTGCACGACTCCAAACATTGGTCTTTCAAAATAATAGTAATATAAATAACAAAAACCAAAACAATTTACGACCCT
>AT1G43910:585-660
TGGTCAATGGTTTGAATTCAAAAGATCAAAAACGCTAGTAAATTATATATGTTGGTAATGTTATTTTTTGTATTC
>AT1G44350:0-80
TTTCGTTAACTCATTATAGTTTTTTTCTTCTCTAAATTATTTTTAAAACGAAAAAATTACTAGTTTACATATTTCATATA
>AT1G44350:145-235
GTAATTTTACTTTTTACGTCTAAAAAATATAAAATAATTCTATAAATTCTAAAATAATATGCAATAAAGATAGTCATTTTTATTATTATC
>AT1G44350:250-425
GATAAATAATATATCAAATCGAAGCTCTCGAGATAAAGAGTACAATAATATTTTAAAATTTTCAAAAATAAATATATGTGATTGTAAAAACGTTTACAATATATGTAAAATTGTAAAAATAGATTATATTACGTATTATTTTAGATTTTATAGAATTATTTGATATTTTTTAGAT
>AT1G44350:430-535
GGATAAAACTGCAAAAATAGAAGACTGTTTTTTCATAAAACTCTATTAAAATATATTATAAATATTCGGCCATTTATAATCGGATTATATATATTTTCTGGTTTA
>AT1G44350:645-730
TACCGGCAATGGGTGATACATGGCATTTGAGATCCCTACGAATATATTATATATCTTATTATCAAATCAAGTGTGCGACAAAAAA
>AT1G44350:725-815
AAAAAAAGAAGGATATAGATGAAATTCTATTATAATATAGTTATTTAATTTATATAATAAATTTCGTTTTGGTCCCCAACGAAAACTCAC
>AT1G44350:885-970
TTTTTAAAGTTTCAAGAATATAACCTTTCCATCTTTAACAAACAATATTATATTTGAAATAAACCAAGAAAAAAACAAAATTCTA
>AT1G44414:185-275
GTTACTTAAGATTTAAGAACACATAGGTGTTTGCAGTATACTTCATTTACAATTTAACATGTTTGCAGTATACTAACATGTTACACCCAA
>AT1G44414:285-345
AATACAACACTAGCATAAATCAGTAGAGTACATGTGATGGGAAAACGGCTTTTATCAACT
>AT1G44414:380-465
TCAAACCTTTGATTTATTTCAAACCTAAACCTAAGAATTATTCAAATAATCTACCTGAACTTAAAGAAAATTAGACGATTTCAAC
>AT1G44414:465-575
ATAAGAATATACGGTGATAATTTGCGATTAACGGTTGATGAATCAAACGATTTGTGGCATTGACGTGGCATTTGGGCAGGGATATACGATGTCGTTTTGGTCTGTTTTAT
>AT1G44414:660-750
GTGAATAGTTCATGGACTTCTCGGCACCTTTCTTTTGCGGGAAGACTGCAGCTTCTCAAGTCTGTCATCTTCTCTACTATTAATTTTTAG
>AT1G44414:1195-1265
AGTTTTGTTTTTAAATCGTTATTTTATAACATTCAATAACATAAATATATATATATATATTTATATATCC
>AT1G44446:170-245
AGTTCTCATGGTTATGGTGAAGGCAGAAAACGACACGGAGATGAACGTTATACTGAAGACAAGGCAGGCAAGTAC
>AT1G44446:630-725
TTGAAAAATTTGATTAAATAGATAAAATGTTAGTTTAGAGATAAGTGACATATTACTCTAGAATGCATATATGGACTTTAAACAAACCTCCTTTA
>AT1G44446:740-830
AAAATAAATTATGGTTAAAATATTTTTATTAGTGTGTTTCTCACTATTAAAATAATAATGGTATAATCATTTTTTTTTTCAATTACCATA
>AT1G44446:985-1080
TAAGGTTTTCACATATTAAATGAATCAACCAAAACATAATACAATAATTTAACAAAGATATCCTAAATAATGTAAGATTCAAAATGTAACTTAAT
>AT1G44575:550-640
TTTGCTATGATAATGTATAAATTATCACATAGCGTCCTAGCGAAATTAATAAAATCTATACTCGAAAATCATTAATCTGAAAGTTCATTA
>AT1G44575:790-960
CCACTTGTTTTGTAATAACGTGAAATGAGCAGTTCGTGTTCAAACACGTCTTACATGGAGACAATTAATTAAACACCACTTACTTGTTACTACAAATATACTCTTTCGGAGTGTTGCGAGCAATTTATAAGTCGCACATATTTTTGACTCGAATCGAGTCAATCAGGTTT
>AT1G44575:1085-1235
ACATATAATTAAAATTAAAATGAAAGTTTATGATATTTAAATATTATATGTCCATTTTGAATATATATGATGATTGTTCAATTGATACAATTTAAATTACAAAATAATGAACTTTTTAGTAGAAGACAATGTTTTGTGTTTAAATTATAA
>AT1G45191:10-105
CACAACCATACACAACTGCGAAAATCATTTATTGAGATCGTTAATATTAATATATTACTCAATAAAAGAAACACCCAAGAAAGCTTGTAAGCCAA
>AT1G45191:220-310
ACTAAAAATATATTTGATTTAATGTTTTTTATTTCTAAATGTATAAATTTTATATTTATATATTATTTATTGTGGAATTACTATGTTTGA
>AT1G45191:335-430
AATAACATATAGTTCATTAAGTTAAAATATAAATTATAACTAAATAATTTAAATTTTAATTATATTTGTTTTGTTAATATATTTTTTGTTTTGTT
>AT1G45191:630-760
AAATTAAACGGTGTTTTGTTATTTGTTTTAATAATATTTGAATTTAAAAGATGTATAGTTCAAATCAAATTAGAAGTTTTATTATAAATGTTTATATAATTGTTTGAAAGTTCATATATTATAATATTCT
>AT1G45191:800-1025
CATTATTATTTTTTTCTTTAAATAATACTTTTACTAAAAGATTTATAATTCAAATCAATTTAAAAGTTTTCTCTCAAATGGTTATTTAATTTTTATAAATTTCACATATTATAATTATTTTAAACGCTTTTCCGTTAAATATTCTAAACGTTTAATAAATTTTAAATAACTACAACATTTACCTTTTAATAAAGTATAATATTAATAATGTCCAAGGATTTCTTA
>AT1G45191:1040-1175
GAATTGATGCAGATATATTAGATAAAAAATGCTAGTAATTAGAAATATTAATTAATTGATAATAATTAATGGCAATGACATTCCTTGTAAATAAGTTCCAACTTGAAAATTTATTTAATAAAAGTGTTGCAAAAA
>AT1G45191:1345-1415
AATTTTGTGACGTTTGGTTAAATTATGTTTTGACTAATTAGTTATTTAATGTTTTGTTTTGAAAATTCAT
>AT1G47395:230-320
TATATGAATTACTAAAAAAATCTAATATATTCGGATTTATAATTATTAATATATATTAATATATATATATATAATCTATAATCCGCACCG
>AT1G47395:395-465
TATTTCTCCCGCACATACCGCAGTTGAACCGTACCGCACTATAATAACGCTTTTTCCGCACAACAAAAAC
>AT1G47395:785-840
AAAGGGCAAACGAAGCGCTGTCGTTTGGTTTCTACATTGTTGACTTGGCTAGCTT
>AT1G47395:870-960
ATCCAACCCACATACAGACAATATATACATTTAGTACTAAAAAGACTGTTATGTTGATTTTCAACGAAAAATAATACTCTTCTATAGAAA
>AT1G47400:55-175
TGATACATATTATATGGATTGGTTTCATAGAATATGTTACATGTACGTAAATCATATATAGTTTTACAATTTATAAAACCCTAAATATCTTTCTACAAATGGTATGTAGTTTAGAGGTCG
>AT1G47400:305-465
TATAAAAAGTCGAATCAGTCAAAGATACTAGAGGATGTACTAGAACAAGTAAACGTCTTGATTTCTTTCGATTTGTAATTATTGAATGTGATGCGGCTTTACAAGTACTGGACCACATTATGATTTCGTCCAATGTGTTGCGAAAAATCTCTTCATTATA
>AT1G47400:850-905
GTTGGGTCACACACGGACACGGGTTGTGACCTGGCTGGCTTCTAGAATATTTTCA
>AT1G47400:950-1040
TAGTTTAAGTTCCATTGCTAAAAAATTTATTAATAAGTACAATATTTAAAATAGTGTATTCCGATAACATGGAATCATATATACGATATT
>AT1G48020:1215-1305
AACCCAAAAATTGATTAGTCAGTTCATACGTTAATAATTAGGGGATATACATTATGCATTCACTAAGAGACCAAAATTAATTCAATTAGC
>AT1G48100:0-75
CAACTTTAAACATGCGTGGCCTACAAAATTTAAGTCGGCCATGTAAATAAACATGATCGGTGACGTCATCGTGTT
>AT1G48100:95-170
GAAGAAAGAGGATGAACAAAGCGACATTTAACAGTGGCGCACACACGCATCAAGAATCTAAACGCAAGAGATTTC
>AT1G48100:260-345
ATCATAATTTATAGGTCGTCAACAATATCATGAACTATTAAAATATTATGTTAAACAAAATAAGAAAATAAAATTAAGAAGGCGT
>AT1G48100:360-470
AAAATGGTTCTTACCTAAAAGTTTTTAGATTAATTCTCTCTTTATAAAAACCTTTCTAATATTTAAATATTATTTTGTCTATCAAAATTGTTTAAAATTTTATGTAAGAG
>AT1G48100:635-725
TTGGAGACTAAGAGGACTTTGTAACTAGCGTCAATAAGATGCTGATAAATTTGGATTTTATAACATAGGAAACATGAGATTTCTTGGAAC
>AT1G48100:720-965
GGAACATATGCGAGAGGCGAGATAATAGTGCCAAATATAACGATATATACCTACCGTGGTAATGTGTCTCTCTCTTCCACCATTTATAAATATCATAAATCTCATATATTACTCAAAAACAAATCCCGTCAAAACTAAACACAACTTAGATAAACATTTAGTAAATAACAAACTCTAATTAATTTAATGTCAAAAATAATAATTAAGATCACTCAAATATTTTTTCTGAATATTAAGAGGTCATG
>AT1G48100:1000-1060
CATGACATAATATTAATTTAGTCTCAAACACTCTTATTGTATGTTGAAAGTTAACATAAG
>AT1G48460:330-390
TCTAATTCAATATCCAAACCTATATAATAGCCGAGTGGTAATTAATATCAGCATATGACA
>AT1G48460:595-685
CAGAAGCTGAAGCTTTAACCACAAAGCTTCTCCGAGATTTAACACAAGTTGTTCCGCTTTGAAATGGTCTCGAGAATTTAAGAGAAGAGT
>AT1G48460:720-775
CAATATAGTCAAGCCAATTTTTTTACTTATGAGAAATTTACACGAAGAAACCTTA
>AT1G48480:0-50
ACTTGGATTAATATGGGCTTATAGAGGGATCTAATTAAGAATTAGACGTA
>AT1G48480:65-175
AAGTCAGTAGATACGTTCACGAAATTCATGTAAAATATATAACTAAATAAACTACTTGATTGGTCCACCTGCACGCATATACTCAACTACATATATGTATATATATGTTC
>AT1G48480:270-325
AAAAGTCATTTAATATTTGAATCTTTTACGAGAAAAATAGAATTATAAGTTTCTC
>AT1G48480:465-555
AAGAAAAAAAATGTAAATATTAATTGTAGTTGTCGTTTCGTTTCGTGTAACGCCCAACCATGTATCGCAGCACGTTACAGCTTCCTTTTG
>AT1G48570:290-365
CACAGTTTGATAGAGACTCGAACCTTTGACTTGGTCTAACAGAAAACGAGGAATATTTGCGACTGCAACCCAATG
>AT1G48570:465-515
TATTAATCCTGCAGAGGGAAGCAAATCCTCTCCTAAAAAGGGTGTGACAA
>AT1G48570:855-910
CCACTTTTCTAGATAGAGAGCAATGAAATAGAATGTAAAGCCGTGACAGAGATGC
>AT1G48920:315-425
ATTTTCTAATTTTTTAGAATGCAATAATATAAAATTTTAATTTATAAATAAATTCTCGAATTAATTATGATGTGCAGTAGCACCGCCTTCACCTAATTATATTTTCATAT
>AT1G48920:440-600
GGAAAAAAAAATCATAACCAAGTCAATCCTTGAATATATGTTTGAAACGTGGAATATATATAAGTTGATAAAATTCTAGGTACACTATATATTTAATTTGGATTTCAGATTTATTAATATTTCTGCAAAAATGCTCATTTGTTCCATAATTATACGCAGC
>AT1G49130:400-455
TCTTAGAGTGACTTAGTTTTGCGGAAGTTGTGGATACACTGGTTAATTATTGATA
>AT1G49130:585-645
ATATGGGCCGATATTATAGATACCAATCCGCTTGCAATTGCGTCCATCTTTAATCTGCAA
>AT1G49130:955-1030
TTTATGCTTTTCTGTTTCGTAAAACATATATTACTAATTGGACTTGGGAGTTCCAATTGGTTAAGCTCAGCTTCG
>AT1G49500:60-150
ACAGTGACTATTGAAACAAAATAAATTACATTACAACTGGATCTAGACTAATAATATGGTACGCTAATTTTGGTGCTATATATGTTCTCT
>AT1G49500:160-255
TCAGGAGCCTCTTTTACAGCACAAGTTATCAATGCGTTACAATTAATTAATGGATTAGTGAACCCATATATCGTTGCCTAGTTTCGGTGATTTAA
>AT1G49500:300-350
GCGTCACTGTCAACCTTCCACTGCGATGGAGAACATATCACATTTACTAA
>AT1G49500:370-530
TATCACATATCTGCACAGATCAAAACTAGTTTTATAATGAAAATAAATCAAAGATCAAATCTTTGTCGCACTGTTGTCCTCGTGTCCCACTGGTGTAATCTCGTCCTGATCCATTTAACCAAAGCCGCAGGATCGCAGTGATGCATATCCACCTGTGCAA
>AT1G49500:610-875
CTTGTCTCCTATGACAATGGTGACAGCTAGATAATAGTGTATAACAAACAAGCAACCGGAATACCGGATCAAACCAAAATTAATATGGCTAGTGTATATACGGCTGAAACGAACAAAGCAAACAATAGAAAACAAACGAAATGAAAAAAAAATTAACGTGGGATTGTACTAGTAGTTGAATCCATGTAAGCTGAAAATATAGGTATTTTGGAAGACACGAATTTCGATTCTCATAGAAAATATTAAATGTTAAGTAATGATTAAA
>AT1G49500:1000-1170
TCCGGAATACAAGCTTTCTTTTCAATTATGTGCTGCATGCGGTATTAACAAAAAAAATTTTGGATCTATATGTTTATCATATACTTCGTTTTTATATTACTAAATAGAAAACATACGATTACGCGCGATATTCCGATCGTTATAAATTGTTTCATAATCACATTTCAATC
>AT1G49760:55-120
GTCATTTCATTATCATTAATAAATTTGTTGATTTTATGATAAGTCAAAAAAATCATTCAAAACAG
>AT1G49760:145-275
GAATCATTCAAGATGAGTATTTTAATTATTAATGTGTTTGGATATTAAGTGTTTGGATATTAAGTGCATGAAACAATAAATATAAATAATGCAATGTTTGGTCTTTTAAAAATGAATGAATAATATATAT
>AT1G49760:390-460
TTTGTACCTCAAATTTTTAAAGTCAAACCTTCTAAAGCCAAAAATAACGGTCGTTACCAATCTGTTAAAA
>AT1G49760:765-825
GAAGTTGCAACATAACGATTTCGAAACTTCTTAAAACTTTTCTCATAACGCAAGCTAGAA
>AT1G49760:980-1105
TTGCAAATTAATCAAAAACTTTACAACTTCTTAGCTATTTTCATAAATTTGCATGGTCATTCAATGGTATTTACTAATAATAATTAAATATGTCTGAACGAACATATTTTTTTTTGACAGTTACT
>AT1G50745:110-160
ACTTGGAGAGAAGCTGGCATTTTTGAAGCAGTCATGGCATCCATATACAG
>AT1G50745:360-435
AGTGGAAGAAGATTAAGAAAGCTAAAGTCAATTTCGTAACACAAGTAGCATGGATGGAGAGATTCATGGACAGTG
>AT1G50920:290-355
CGAATTGAAAACTGAAACAGCGTCAAGTAATATCTGAAACCAAAACGATGAGAAAATCAAGCACA
>AT1G50920:500-615
CTAGTAGAGTAGATATCCCACTGTAGAACAAATATTACCCACCTAACAAGATTAGCTCTAAGACATTACATAAATGATTTAATTCATGAACCAATCAAATACCTAGCTGCCTTTA
>AT1G50920:1055-1145
GAATTCAATCGATACAAGTTCGACTCAAAAGTTGTCTATTTTTAACAATGGATCAGAAGAACAATGTAGATAGATATACCTTGAGAAGGT
>AT1G50920:1210-1275
TGCTCGAGTTCAAGCTGACTTAGCTGACTCTTCAGCTTCTCTTCTAGAGCTTTAACTTGTGTATC
>AT1G51140:15-75
TTAACGCCCAAGGCATTAATCGGTATCAAACTATTTTGCTGCATAAATATTTTGTTTTTT
>AT1G51140:105-155
AAAATAATTCATTGGTTGGAATTGAATCTCTTACTACACTACAATAACGT
>AT1G51140:180-320
TCATACAATATTTTTCTTCTTAATTGGGCAACCAATTATAAAATTATTTTTCAATTAATATGTGATTAAAAAAATTACTCATGTAGTCATATTAATTTGCCGTGTAAAACTCTTGTTTCATGGATTGTAACTATGGCCCG
>AT1G51140:605-685
CGACTCTCAAGTGTTTTTCCAAATCAAACACGCAAATACGACATATTAATTGAAGTGGATAATGAAATTTGAATTCGGAT
>AT1G51140:690-840
TTAGTAGTTGTTGTTATGTACAGTATTTTGTAGATTAAATAGCACTTGGTCTTTAAACTTTAAACAAGTACTAGTATTATACAAAAACGTAAGTACAATACGTGTCCTATATTTTATGCGGAGGTACATACGTGTTTAAACGTGAATAGT
>AT1G51140:940-1040
CTTCTTTTTATATTTTTGGATTTTATTTATTTTTTTATAATTTATTAATAAATATTATAGTTTGTTTTTCTTTTTAAGTTATCCGTCATTTCAATATACG
>AT1G51140:1065-1205
CAGCCATTTTTATTGCTTTATAAGTCAACAGCTTTAATTCCCACAATTATATATAGTCGTCGTTTTATTTTATTAAAAGTTCTGAATCATTTCAATAATTGCTGATTTTAAAATTCATTTATTAAAATTAAAAATAAGAT
>AT1G51270:245-335
AACTTCCAACTCAAAATCAACTAACAATGTCTTGAAAGTTACACGTTTCTTATAAACTACTCAAGTCCCTTCCCATCCTTCCAATGTGGG
>AT1G51270:650-755
CGGATCTTTGTCCACAAAAACTTTTGCAAAGATCAAAAAACATTAATCGTCCCATGACTCTAGAATAACGCCCGAACCATTGCAAGTGGTTCCCTTGTAAAATGC
>AT1G51270:860-1015
GTAAGAAAATTAATTTCATGTTCTTTTTCTTTTGGTACAGTACTTGGTGGGATTCAAAAATGTACATACTATATACACCAACCGCCAAAAAATGAGATTCAAACTACAGTCAATAAGAAGCAAGGAAGACTAAATAGAGGGAGCTAGTGATTATC
>AT1G51270:1180-1270
TTTATGGTAACTGTAGAAAATTGTAAACTATTGTTAAATATTTTATAAGAAATATAATACAAAAATTTAAGCAATATATTTACTTATTTA
>AT1G51380:0-60
AGTTCTAGAAGAATTAATACTCTTCAGCACTATGTATCCTAAGGGAAACGTTTTACAATT
>AT1G51660:265-345
TATCTTCATACAATGTTGTTATGTCCAAATTGTTGAATTTTTCATTTAGAGTTAGCTTCAGAGAAAACAACAAAACTAGT
>AT1G51660:500-565
TTTGGGAAAGCTATTGAATTTAAGAGGAAGATGAATCATTTTAACAAGCTCCATCGATTTTGCGC
>AT1G51680:55-125
TTGACATCGCTTTCACAAAAATAAATAGCTATATATGATTATTATCCATTAATTGTCTCTTTTCTTTTGC
>AT1G51680:155-250
TATCCATAGCATTTGTGTGGTGAATCTTTTTCTAAGCCTAATAGTAAATAAATCTCAATACAAGAACCCATTTACGAACAAATCAAACCAAGTTG
>AT1G51680:365-415
TTGTAAATATTTTTTTAGTCTTAAAAAAGACCCAAATTCTTATTAATTTC
>AT1G51680:785-935
CATAACTTTCTTTTTATCCAAATGGATTTGACTGGTCTCCAAAGTTGAATTAAATGGTTGTAGAAATAAAATAAAATTATACGGGTTCAATTGTTCAATTGTTCATATACCGTTGACGTTCAATTGTTCATATACGGGTTCCGTGGTCGT
>AT1G51680:1000-1065
AGAGTATGATACACTCATATATACCCAAATATAGCATATATTTATAATATAACTTTTGGCTATGT
>AT1G51940:210-300
AAATTATAATCGAGTCAGAAATTAGAAGAATGGGTAGCTTCAGTTAACAAAACTCTGTCTTGACTTATAGAGAAGGCCTACGATGGATTA
>AT1G51940:325-435
CTTTTGTTTTACTCAACTCGGATCAAATTATAAATCTTCTCTTGCGTCAATTTGACTCTAAAATAATTTATGAAAAGAAGACAAAAAGTGTGACATTCTGTTTTATTTTT
>AT1G51940:650-705
TACTTTGAAACGATAAAGCACAAAATCTTCTAAACTTTTGCTTAATTAATCCATT
>AT1G51940:895-1020
TCTAATATATATCGATTATTATATTAAAAAGCCAGTAAAAAAATAATTCTCCCTTTCATTTACACAAAAACTTAATTTAAATATAAGAATGAAATTAATAATTTTTTTGTGAATCTTTAAAATAT
>AT1G51940:1025-1100
TTCCAATACAATTTTAATTAAACAAAAAACAAGTTCCTAAATTAAAAACGAAGTTCTTAAACTTTCAACCAAAAA
>AT1G52190:75-165
AATACTTCCACACATTAGTTTACTAGGTTATGTTATAATATAACAAACACATACAGTTAATCGACAATGTGTAAGGATAAATTATTGAGC
>AT1G52190:190-345
TTTTTCTGTCAGACTGTTTAATAAGATTGACTTATGATATGAATAAATGACTGATGGGTCGAAACCAGAATAAAAAGCTATTTTAATTATGATTGCACTAACTTTAACGTGTCCTTTATTTCTATAAAAGATAAAGAATAAATAATCAAGAAAAA
>AT1G52190:745-825
GTGTGACGAAATTTGACAAATTAGTTAAGAGAATAAATGATAACAAAGATGACCGAACTAAAGATTTAGTTAATTAAAGA
>AT1G52190:895-1005
AAAAAAAAAACTAATAGAACAAATGGATAATTAATTATCTGACGATTTAACAAGAACTATATTAATAAAGGTTATCAAAAGAATAATGTTTTGACTCGTAAAATTAAACT
>AT1G52190:1115-1445
TGTTTCAACCAAATTTCACCCATTTAACCTGATTAAACTATTATATACTATAAATGTGAATTTTCTTATATTTTGGTTAACAAATTATATTATATTATATGGGTTAAAACTTGTGTAATAACGTAGCGATACCACTAACATAAAACAAAATATTAATTTTAGCTAGTGTAACAACAGTTTCAATAATATTTTCCCTTTGATGTAACTAAGCATATAATTTTAGCAACTATAACAACAGAAAATTCTATCCGAATAGCAAAAAGAATTATTGAAGTTGATGTCATTAATGTTAACACAGTCTAAATTAAAAATTATTTTCATAATTTATTA
>AT1G52200:370-460
TTCTCTGGTTCTGCCCACCTTGAGAAACCTGCCACCAAAACGACGTGTACACGAAAGTTAATGATCCTTAGACCAGTTTAATCCCATAAT
>AT1G52200:500-610
TAGCTTCAATAATCTAAGCTTTAAATCTTGATGGTCTAATCTCCATTTACATGCTTTTGAATAAATCTGTTTGACACAATTTTTTCAAGTCTAATGCGGTTAATTAATTG
>AT1G52200:640-710
TCATGTCTTTTAGGTTTTTTAACCAATTATGATACAAATTTTAAATATTGCTACCCCAATGTCTTTGTTT
>AT1G52200:785-945
GTATGATATCTTATAATGGTCATGTAGGTGATGTATGATATCTTATAATTAATCATGTTGGAAATCACCCCCACAATAATATATGTAAATATATATCTTAATTATATCTTAAAATATACAATTATGGTAATCAAACTTAACCTACTAAAAGAAAAACATT
>AT1G52400:85-135
ATACGAAAGCCAATAAGTGTTATAGTGCTTTTGCAATTCATATATTTAAG
>AT1G52400:370-535
AATTGCATCTATATATGTGTCAAAGTAACTCTGATTTAAACTATTTAAATCATCTCTTATAGAAGTACTTTATTACCGGTATTTAAAAACTCGAAGTTAAGGTTAATCATAATAATATAATAAATTAAGATAACATAGATAAGTTTTTTTTTATATATATTATTA
>AT1G52400:590-655
AAGTAGTTACATTTTAAGTCAAGAACTAAAAGTCTAAAACTATAAATTTGTGGGGCAGAAATATC
>AT1G52400:950-1040
TTGATATAGTGAACAATAGCTCAATTATTGAGAACTGTCTTAATAATTGTATAAATTCCTTTTTCATGCAATTTTCATTTTTGTTTTCTG
>AT1G52400:1095-1165
CAACCAGCAAGAAATTTCATTAAATAAAAGATATGAGTCCGACGTGAAAGCGTTCAACAACCACTTTCCT
>AT1G52560:175-230
ACTTTACAAAAACGAATCTAAACAACTTAAAAGACGTCGTATCTGTGACATCTAC
>AT1G52560:525-635
TAAGCAAAATATAAGTATTAAACAATATCAAATAGGTTTAAATTAATTTTATTACACAGAATAAAATAATTAGTAATCATCAATAATACTAAAAACATATAGTAGTACAA
>AT1G52560:845-915
GTACAAATATTCAAATTTCCTATATTACCACCTCGTTTACAATTTATTAATGGTTATGATATATATGTTT
>AT1G52560:995-1085
GTATAACAAGTTAGCAACCCACATATGTTGCAGAGTTGATTTATAAAAAAAGATTGGGGACAGAGTTACCATTAGAAGTTTGGATCGAAA
>AT1G52565:0-50
TAAATTATTCGTATAGAAAAACGACTAAAAGAAAAACTCTCATCGAAATT
>AT1G52565:235-315
CATCATGAGTTGGTTACAATTACAAAAATTTTATTTAACTCTAATTAATTCCAACAGTTTCTCCACAAATTACTTATATA
>AT1G52565:520-650
GTACCGTATTTGATTAGGTTTTTATGTACAAAACGCGGCAATATTAGGTTTTGAAACAAGACACGTGGCAAAAGCCCATGTTCACGTAAACACCAAGGTTCTGGATCATGTTGAATGATAGAGATTTGTG
>AT1G52565:715-800
TCATCACAATTTTTATCTCCCTGATTTTTAGTTATTTGTATTAAACGCGTAAACATGCAAACATATTTTTTTCAAAAAGAAAACA
>AT1G52565:780-870
TTTTTTTCAAAAAGAAAACAAAAACTTTCAAACATAAATAAATATAAATACTCTCCATAATTTACTACTAATATTATCTTGTATTGTTTA
>AT1G52880:35-160
AAACGTAAAAAAGCTTTTTTGAATTTTCACTTTGTTGCCTTGTGTGGCACTTAAGCGGGTCCCATTTTACAGCTTGCCACGTGTCGACGTAATGTACTCAGAATAACACGGTACTATTGGAAGCA
>AT1G52880:330-555
CCACTTAAGTTTAGGGATGATGAAAAAAACTACCACGTAAAACAATAATAAATCGGTTGGTTGAAACCTTGCAAGTTCCATGTAAATTTATTAAAGTATATATTATTTTAAAAATATTTTATAGATAAAAAAACTAAATTAATAGTGCCGTGCACTTTTCTTATATGATTTTTGTTATTATAATTTTTTTTAATTTTTTTATTATAACTTACTATAGAGACAAAA
>AT1G52880:865-945
TTGCCAACAAATTCTAATATTCCGGGTCTAAAATAATAAAATATTATTTTTTGGGGTACAATTGTTAATTACAAACACTA
>AT1G52880:1040-1095
TAAACTACGATTTAATTCTAGCTAAGTACATATAGATCAAATTAATTAGTGAAAA
>AT1G52890:10-185
ACCGACACTAAAAATGTAGATAAAAATATTAATTTATACATTATCCAACAAGGATTTTATCCAAATCGTGGTATCTATGTGATCTAATGGTTATAAGTGGAATTTAGGTGTTCTAAACATGCTCAATTAGTCAATTATATACTTCACTTTCCAACTCAAAACAGCATATTCCGAG
>AT1G52890:405-495
TTGTTAATGTTTCTGAAAACAAAAATAAATTGAAAAAATCTTTAGTCAACATCAACTCGTGTTTTTTCTCTTCTCCCATCGTTATAACGT
>AT1G52890:500-595
TGACAAATGACAAATTGCGCCTAACTTCTACGATAGACACGTGGACACGTGTCGTCATGATGTAGTTTTGTCCGTATGGAAAACGCTTTCCATGT
>AT1G52890:670-760
CCACAACATTACGCGTGTCCTTCTTATTACAACATTTGGCACATATACATTTCAGAAAACCCGTCAACAAAAAACACGTGAAATAAAATA
>AT1G52890:845-935
GCCAAATAATTGTTCCTTTATTCTGAAATTCAGTCCCCTACACGAATATATAGACCACCAAAAAGTACATGGACGGTTCAATGTTGATTA
>AT1G52890:1060-1150
AAAATCATTTTTTTAATTTGTTTTACATTACTTAAATAATTAAATAGACAATCCTAGGAAAAAAATCTCGATTAAATTAAATATTATATG
>AT1G52930:0-60
AATTCCTTAGTGTTATAAACCTGACGATATCCAGAAAATGAGTTTTGCATTGTGGTTTTA
>AT1G52930:95-160
ACCTGAGCTGCCTTTACAAGTGTGAGAGCAACACCAGGAGCACCGTGACACCAGTGAACAAGGCG
>AT1G52930:435-525
AATCTTGAACTTTCTTGAGTAAGTCAATTAACCAAAGAAATTTTATAACTTTATTATACCATTCGTTCAGATGATATACTCTCCTGACCA
>AT1G52930:985-1065
ATAAGCTGTCCCAAGAACTCCAGTATACAAGTTATAATCTCGAACACGTTTTCCAGATCGTTCCCATGTCTCCCAGACTA
>AT1G52930:1095-1185
AAAACACAACTTCACTAGACTAAAGAAAAGTCATAAATTCATTATAACTACATAACTTCATTATAACTCAAAATCATATATAATCAAATT
>AT1G53540:55-110
TGGTTTTTATTTAAGTCGATTGCAGAGTAGCTTTTAGGGCTTATAAGATGGGATG
>AT1G53540:460-575
GATGGTCTAGAAGGTAAAGCATTGCTAGTTACTGATTCAAGGTAAAACGATGCAATTTGCAAATTTCTAGATCTAGAGCTAGGTTTCAATTGTGTATGATTGATGATTTGGGATG
>AT1G53540:1305-1455
TTGTTCAATGTTCACCAAAAAAATAAATTTAGACGAAATCATTAATGGGCCTCGATATTATAGCCCAAGAAAAAACAAAAAAACGGCAAGGCGTTCACTCGCCGACCTGATGCATTGCACGTCGTCTCAGCCCTCAACACCAGAAACTTC
>AT1G53700:85-145
TTTAAAAATCCATTAATATGGCATTCGTTAGCTCATTATCAAAAAATTATAAATTTGCCA
>AT1G53700:185-265
TATATGATCCGGTCAAACAAATTTATGAAGCTGCATTAATGCAGTTGAAATTATTGATACTGCCAAAAGGTTAATTGAAA
>AT1G53700:505-685
ATCAATTTTTTTAACAAAGCCATTTGAAGACGATTTTGACGTTGAAATTCAACAGCTTACGTTGGATAGTAAGTAGTGACGCACCTACGAAAAAGGTACTACGTTGTTTGTGACAACGATACAAAAATAAAATAATCTATATGTATAAGCGTTTCATATCCTATTTAATATTTTTTCTTG
>AT1G53700:1030-1120
ATAAAGAAGTAAGACCTAAGACGCAAAGTCTTCAGGACGTTAAAGCCGACAAGCCGTTACTGCCTCATTAATGTTTCTTTTTTTTAAATG
>AT1G54050:225-315
TCCACCTCCACTCTTATCCACCTTCAACCGCTTTGGCATATGAAACGAAAGCGGTTGAATCGGTTGCAAAGGTGGGAGACTCTCAGCAGA
>AT1G54050:1235-1340
GAAAACACCCTTCACTCTTTCCTTTAATAACAAAAGAACAATATTAGAAATTTAGAACCGTGACAGTATTCGAATGGTTTTATGGTAAATACTCAAATATCGCTA
>AT1G54050:1375-1430
AATATTGAATATACACACTGACGGATTTCAAAATTTCTCTAATATACAAAAGTAT
>AT1G54570:15-105
ATTTGCATGATATTTGAAACTAAAAGAATCAATTAATAATTCTAATTTAAGATCAAGAAAAACAAATTAAATATGTAAGTATCTTATACT
>AT1G54570:115-210
TTTGATGATTAGAGAAATAGATATACTTTTCGTTTAGGACAAATATTATTAACATAAAAATATATTCAATTAATAAGTTAATGGGATTACTTAGC
>AT1G54570:455-595
CAAATCAACAACCAGAAATTCATCCCATGCAATTAATATTTGTTTATAATTTTTGGTAATAATATATTATTAATTGTGTATTATTATTACTTTTTAACAAAAATAAAAATATATATATTATCTCGTAAACTGCATTGGAC
>AT1G54570:905-995
TAGCGATACAAAGAATTAATCTTATGAGAAAAACAAAAAGATATTAATCATAAAGAGAGACGGAATAATAGATAAACAATAGTGAAAAGC
>AT1G54820:145-225
TCTAAATTTTGTTTTTATTACTCTCTAAACAAAAACGAATTAACAAGATTTCTGCACAAAAATGTATGCATTTTGTTTTA
>AT1G54820:275-375
AAGACAACAAACCAATCAATCACACGTGAATATTGCCAGAAGAGATATACACTTGGAGAGGATAATGAACCATTAGGTGTCCCCAAGTACTAAACTAGAC
>AT1G54820:535-585
AGTAAATACTACAATTTTTTTTTTTTTTTTTTTTTTGGTAAAATATTACA
>AT1G54820:650-740
AACTAAAAAGACGTTGAAAATGGCAAATATCAATCATCAATCCAAATAATATTCATATACCTTTCATCTATGAACTAAGGTTTTTTAACT
>AT1G54820:925-1000
TTTGAGAACAATTTTTTAAAAAAGGGTAAAAGACTAGAACATATAGTCAATTGATCATCTACACATGTTGTTGTT
>AT1G55020:205-275
TAGTTCAATCATATTTATTCTCAATAAATAAAAAGGTAGGTAAATAATCATGAGTGAACTAAAGAAACGG
>AT1G55020:275-365
TAGAAATACAATTGTCACCATCCAATCACATTTAAGGTCACATTTATTAACAATTACAGCTGGCTGGATCATGATTCATGACAAATTGTA
>AT1G55020:350-450
TCATGACAAATTGTATTCAACAATAATTTTACAGTCTCGGTTCAATTATAAATTATTCTCCCTTTTTTGGCAATGATAAACGAGTCATTTTCGGATTAAC
>AT1G55020:875-965
AAATTCATTAAATTTAAGAGTTTACTCGCTCGTATCATCCAATACGGTTGGTTTTTCTCTTAAACGATTCTTAAGCGTCGAGAGTCTTTT
>AT1G55020:1045-1225
TATTATGTTGTGTTTCATTTGAAATCAATATTATGAGTTTTAATTAATAATATCATGGTATTCTTATAAATTATGGTATCAATTTGACAAATTTTACGTTTATAATTTTCGAATCTCCTAACAAGCAGTCAATAATATTCTATAAATAACCAAGTGGTCGTGATCTACTGGTTTCCACTT
>AT1G55230:320-470
TCTTGTTGTTTTATCATGGATAATATACTTTTCTTTCTACGTATATTTAAGTATTCTTTTTTACTTTTATTTGTGACATACTCTTGAAAATCATTCTCTAAATAACGAATGAAATACTCGATGTTAGGAAATAATGATATAGAATATTTC
>AT1G55230:595-685
GATATCCGATAGAATCATTTAACTCGTCTACCTGCTTAATATCAAATTATCAACTGTGACACAGCATGCTTATGAAAAATATATGAAAAA
>AT1G55230:790-865
TTTTAATTTTATTTTTAAGAACAACTATATTAGATTGACTCAAACAAGTTAATGTTAAGGAACATTGTTTACATA
>AT1G55230:880-1035
CCAAATATGTTAATATATACTTCAAAATATATAAAATGATTAAAAATAATTAAATTTTATTAGATTATGGTTAGTTCATAATTATTTGAAAATGTTTCGTACAAAAAATAATGTTGAAATGATTAAACAGTAGTTGTTTTTAATATATATGAAAA
>AT1G55230:1035-1145
AACTGAAAACATTAATACTGTATCTTAGTATCAGTGTGGAAGTATATACGGCCTACAACCTTAATTATCTAACAAAAAAAAATTGTTAAGAGTTTTGTAGATACGTATTT
>AT1G55230:1195-1340
TTCTTATATTTTTCAACCAGAATTCAACTTAACATTTTTATAAATAAATTGATATCGTAGTCAGTTATATTTTATAGGGTATTTTATATTATTGTATAAATTTATCGATCATGATTAAATTATATCATTTGGTCAAATGACGCAG
>AT1G55260:300-480
AAAACCCAAAACTTCGTAACATGCCATAGTGCTAATAAATTTTTTATAATGAAAAGTCCATTCGTACGTAATGATAGATAAAAATTCGTATTTAGATTCAAATAATAAAATTCTTGAATCAGTAGTGGAAAGATTAAATAGTCTTCATCTTTTTAATCTACCCTTAAATGTACCATTTAC
>AT1G55260:670-1185
TAGTTTTATAACTCAGTTGGGAATATGATCACCAAGCTTGATATTAAACAAATTAATTAGAGCCAGAAAAGGACAATAATTCGAGTGGCTTGAATTCAAAAACCACAATCACATGCATACGAAATTGCGGAGTTCCTAGGGCTCGACGATCATTAATTGCTCTCATAAATTTTGGGCTTATCATTTAGCCTACATGTAAAAATTATGATTGTATATGCAGACGTATGGTTCAAAAAATGGAATAATATGATTAAAATAACACCAAAACAATATGGTGAGATTATTGAATTAATTGATAATATAAATGTTGCGACGTGACACCACCTTCAATCTCTATCAATATGTTTATATAAATATCTCTATCCAATTGTTCAGGATCATTATTCAACAAATTATGGA…
>AT1G55260:1325-1415
TTTCTTTGGCTGAAAACAAATATCTACCATTTAACACTAACTATTAAAAGACTGTGTTTTTAAGGAAAAAAAATACTTTAAAGTTTAAAC
>AT1G55450:10-65
CCAACATAATTATCAATCACTTTCTTCACAACACCTTTTTGCTTATAATACCCTT
>AT1G55450:690-755
AACATGATGTCTATCGTTAATATACTCATTGTAGACAACAGTGGCAGCGATACGAGAGAAACGGT
>AT1G55450:1250-1320
AAAAAAAAGGTAAATTTACAACTTTATAATATATGCCTCAAATAATTTTAACAGCTTGTTTGGTCTTATA
>AT1G55450:1340-1405
AGTCTTTCACAATGGAAATTATTGAATCTTGCATTTTTATTGAATTAATTTCCTATTTGTAACAG
>AT1G55530:870-945
TCATCAGTGTTCCATAAGCGAGGGAGAATTATGAAGAGTCGTCGTGTCCATACAAAGCAGAGCAAGAAGATTACA
>AT1G56110:415-495
TTGCAAAACTATATGATGACAAGAAAACCCATATTAGTACCAGAGTGGCAGGGACGATGTAAGCAAAATCCATAGACCCT
>AT1G56110:705-780
GTACGTCTATATTTGTCATATAGGCGAAGTTGAAGATGGTGTGATAAATGACAAAAGCCGATAATCCTTTTGTAT
>AT1G56120:255-325
GATTTCACTTTGATTCGATAATAATAATTTAGTAGTTAGAAGTTGAAATTGATCTTTAACCGTTAGTGAT
>AT1G56120:390-470
TATATTCATGTGTTGTAATGTTTTATTTGGGAGTCAAAAATGAAATAATCTCTGTACTACTTTCATGAGTGGGGGTTCCA
>AT1G56120:510-585
TATGCTTATGTCATGAAGATGTAGACGTCACATGAGCAAAGATCGTGTAAATAAGTGGGGGAGAAAACCAGAGCT
[truncated: 7,880 more rows]
