# Supplementary material for: Transcriptomic Data Meta-Analysis Sheds Light on High Light Response in Arabidopsis thaliana L
Source: Int J Mol Sci. 2022 Apr 18;23(8):4455. doi: 10.3390/ijms23084455 (PMC9026532; doi:10.3390/ijms23084455)
Supplement: Supplementary file 1 [file ijms-23-04455-s001.zip › S8.xlsx]

## Sheet: S8
Table S8
Result of search of protein–protein interactions in string-db, which was used for gene network reconstruction in Cytoscape
#node1	node2	node1_string_internal_id	node2_string_internal_id	node1_external_id	node2_external_id	neighborhood_on_chromosome	gene_fusion	phylogenetic_cooccurrence	homology	coexpression	experimentally_determined_interaction	database_annotated	automated_textmining	combined_score
AT5G14520	AT2G40360	630075	618335	3702.AT5G14520.1	3702.AT2G40360.1	0	0	0	0	0	0.964	0.9	0	0.996
AT3G21540	PWP2	621403	609393	3702.AT3G21540.1	3702.AT1G15440.1	0	0	0	0.543	0	0.965	0.9	0	0.996
AT5G15550	AT5G14520	630178	630075	3702.AT5G15550.1	3702.AT5G14520.1	0	0	0	0	0	0.964	0.9	0	0.996
AT4G04940	PWP2	625105	609393	3702.AT4G04940.1	3702.AT1G15440.1	0	0	0	0.544	0	0.965	0.9	0	0.996
TOZ	AT3G21540	630307	621403	3702.AT5G16750.1	3702.AT3G21540.1	0	0	0	0.581	0	0.965	0.9	0	0.996
AT5G66540	PWP2	634922	609393	3702.AT5G66540.1	3702.AT1G15440.1	0	0	0	0	0	0.965	0.9	0	0.996
AT5G66540	AT5G15750	634922	630199	3702.AT5G66540.1	3702.AT5G15750.1	0	0	0	0	0	0.965	0.9	0	0.996
AT5G15550	AT2G40360	630178	618335	3702.AT5G15550.1	3702.AT2G40360.1	0	0	0	0	0	0.965	0.9	0	0.996
AT5G15750	PWP2	630199	609393	3702.AT5G15750.1	3702.AT1G15440.1	0	0	0	0	0	0.965	0.9	0	0.996
TOZ	AT4G04940	630307	625105	3702.AT5G16750.1	3702.AT4G04940.1	0	0	0	0	0	0.965	0.9	0	0.996
AT4G04940	AT3G21540	625105	621403	3702.AT4G04940.1	3702.AT3G21540.1	0	0	0	0.544	0	0.965	0.9	0	0.996
AT5G66540	TOZ	634922	630307	3702.AT5G66540.1	3702.AT5G16750.1	0	0	0	0	0	0.965	0.9	0	0.996
TOZ	PWP2	630307	609393	3702.AT5G16750.1	3702.AT1G15440.1	0	0	0	0.547	0	0.965	0.9	0	0.996
AT4G28450	AT4G04940	627468	625105	3702.AT4G28450.1	3702.AT4G04940.1	0	0	0	0	0	0.946	0.9	0	0.994
AT5G66540	AT1G63810	634922	613137	3702.AT5G66540.1	3702.AT1G63810.1	0	0	0	0	0	0.946	0.9	0	0.994
AT5G66540	AT4G04940	634922	625105	3702.AT5G66540.1	3702.AT4G04940.1	0	0	0	0	0	0.944	0.9	0	0.994
TOZ	AT4G28450	630307	627468	3702.AT5G16750.1	3702.AT4G28450.1	0	0	0	0.556	0	0.949	0.9	0	0.994
AT5G66540	AT3G21540	634922	621403	3702.AT5G66540.1	3702.AT3G21540.1	0	0	0	0	0	0.932	0.9	0	0.992
AT3G10530	AT3G06530	620173	619794	3702.AT3G10530.1	3702.AT3G06530.2	0	0	0	0	0	0.932	0.9	0	0.992
AT5G22100	AT1G06720	630804	608446	3702.AT5G22100.1	3702.AT1G06720.1	0	0	0	0	0	0.932	0.9	0	0.992
AT4G04940	AT3G10530	625105	620173	3702.AT4G04940.1	3702.AT3G10530.1	0	0	0	0	0	0.932	0.9	0	0.992
HSP90.1	SGT1A	633425	626937	3702.AT5G52640.1	3702.AT4G23570.3	0	0	0	0	0	0.93	0.9	0	0.992
AT5G66540	AT3G06530	634922	619794	3702.AT5G66540.1	3702.AT3G06530.2	0	0	0	0	0	0.932	0.9	0	0.992
AT5G66540	AT4G28450	634922	627468	3702.AT5G66540.1	3702.AT4G28450.1	0	0	0	0	0	0.932	0.9	0	0.992
PWP2	AT1G06720	609393	608446	3702.AT1G15440.1	3702.AT1G06720.1	0	0	0	0	0	0.932	0.9	0	0.992
AT5G66540	AT3G10530	634922	620173	3702.AT5G66540.1	3702.AT3G10530.1	0	0	0	0	0	0.932	0.9	0	0.992
AT3G10530	PWP2	620173	609393	3702.AT3G10530.1	3702.AT1G15440.1	0	0	0	0	0	0.914	0.9	0	0.991
AT4G28450	PWP2	627468	609393	3702.AT4G28450.1	3702.AT1G15440.1	0	0	0	0	0	0.918	0.9	0	0.991
AT3G10530	AT1G06720	620173	608446	3702.AT3G10530.1	3702.AT1G06720.1	0	0	0	0	0	0.913	0.9	0	0.99
AT3G21540	AT3G10530	621403	620173	3702.AT3G21540.1	3702.AT3G10530.1	0	0	0	0	0	0.913	0.9	0	0.99
AT3G57000	PWP2	623910	609393	3702.AT3G57000.1	3702.AT1G15440.1	0	0	0	0	0	0.909	0.9	0	0.99
TOZ	AT3G10530	630307	620173	3702.AT5G16750.1	3702.AT3G10530.1	0	0	0	0	0	0.909	0.9	0	0.99
AT5G15750	AT3G06530	630199	619794	3702.AT5G15750.1	3702.AT3G06530.2	0	0	0	0	0	0.902	0.9	0	0.989
TOZ	AT1G06720	630307	608446	3702.AT5G16750.1	3702.AT1G06720.1	0	0	0	0	0	0.903	0.9	0	0.989
AT4G28450	AT3G06530	627468	619794	3702.AT4G28450.1	3702.AT3G06530.2	0	0	0	0	0	0.902	0.9	0	0.989
AT4G04940	AT3G06530	625105	619794	3702.AT4G04940.1	3702.AT3G06530.2	0	0	0	0	0	0.902	0.9	0	0.989
TOZ	AT3G06530	630307	619794	3702.AT5G16750.1	3702.AT3G06530.2	0	0	0	0	0	0.902	0.9	0	0.989
AT5G66540	AT1G06720	634922	608446	3702.AT5G66540.1	3702.AT1G06720.1	0	0	0	0	0	0.903	0.9	0	0.989
AT3G21540	AT1G06720	621403	608446	3702.AT3G21540.1	3702.AT1G06720.1	0	0	0	0	0	0.903	0.9	0	0.989
AT3G06530	AT1G06720	619794	608446	3702.AT3G06530.2	3702.AT1G06720.1	0	0	0	0	0	0.903	0.9	0	0.989
AT3G57000	AT3G06530	623910	619794	3702.AT3G57000.1	3702.AT3G06530.2	0	0	0	0	0	0.903	0.9	0	0.989
AT4G04940	AT1G06720	625105	608446	3702.AT4G04940.1	3702.AT1G06720.1	0	0	0	0	0	0.903	0.9	0	0.989
AT3G06530	PWP2	619794	609393	3702.AT3G06530.2	3702.AT1G15440.1	0	0	0	0	0	0.904	0.9	0	0.989
AT5G22100	AT3G06530	630804	619794	3702.AT5G22100.1	3702.AT3G06530.2	0	0	0	0	0	0.888	0.9	0	0.988
AT5G66540	AT3G57000	634922	623910	3702.AT5G66540.1	3702.AT3G57000.1	0	0	0	0	0	0.889	0.9	0	0.988
AT4G28450	AT3G10530	627468	620173	3702.AT4G28450.1	3702.AT3G10530.1	0	0	0	0	0	0.888	0.9	0	0.988
AT5G15750	AT1G06720	630199	608446	3702.AT5G15750.1	3702.AT1G06720.1	0	0	0	0	0	0.888	0.9	0	0.988
AT5G22100	AT4G04940	630804	625105	3702.AT5G22100.1	3702.AT4G04940.1	0	0	0	0	0	0.892	0.9	0	0.988
AT5G22100	PWP2	630804	609393	3702.AT5G22100.1	3702.AT1G15440.1	0	0	0	0	0	0.888	0.9	0	0.988
AT4G28450	AT1G06720	627468	608446	3702.AT4G28450.1	3702.AT1G06720.1	0	0	0	0	0	0.888	0.9	0	0.988
AT3G57000	AT1G06720	623910	608446	3702.AT3G57000.1	3702.AT1G06720.1	0	0	0	0	0	0.888	0.9	0	0.988
AT3G57000	AT3G21540	623910	621403	3702.AT3G57000.1	3702.AT3G21540.1	0	0	0	0	0	0.878	0.9	0	0.987
AT4G28450	AT3G21540	627468	621403	3702.AT4G28450.1	3702.AT3G21540.1	0	0	0	0	0	0.878	0.9	0	0.987
AT5G15750	AT4G04940	630199	625105	3702.AT5G15750.1	3702.AT4G04940.1	0	0	0	0	0	0.878	0.9	0	0.987
TOZ	AT5G15750	630307	630199	3702.AT5G16750.1	3702.AT5G15750.1	0	0	0	0	0	0.878	0.9	0	0.987
AT3G57000	AT3G10530	623910	620173	3702.AT3G57000.1	3702.AT3G10530.1	0	0	0	0	0	0.878	0.9	0	0.987
AT5G22100	AT3G10530	630804	620173	3702.AT5G22100.1	3702.AT3G10530.1	0	0	0	0	0	0.878	0.9	0	0.987
TOZ	AT3G57000	630307	623910	3702.AT5G16750.1	3702.AT3G57000.1	0	0	0	0	0	0.878	0.9	0	0.987
AT5G15750	AT3G57000	630199	623910	3702.AT5G15750.1	3702.AT3G57000.1	0	0	0	0	0	0.878	0.9	0	0.987
AT5G66540	AT3G11964	634922	620332	3702.AT5G66540.1	3702.AT3G11964.1	0	0	0	0	0	0.88	0.9	0	0.987
AT5G22100	AT5G15750	630804	630199	3702.AT5G22100.1	3702.AT5G15750.1	0	0	0	0	0	0.878	0.9	0	0.987
TOZ	AT1G63810	630307	613137	3702.AT5G16750.1	3702.AT1G63810.1	0	0	0	0	0	0.88	0.9	0	0.987
AT5G66540	AT5G22100	634922	630804	3702.AT5G66540.1	3702.AT5G22100.1	0	0	0	0	0	0.878	0.9	0	0.987
AT5G15750	AT3G10530	630199	620173	3702.AT5G15750.1	3702.AT3G10530.1	0	0	0	0	0	0.878	0.9	0	0.987
AT5G22100	TOZ	630804	630307	3702.AT5G22100.1	3702.AT5G16750.1	0	0	0	0	0	0.878	0.9	0	0.987
AT4G28450	AT3G57000	627468	623910	3702.AT4G28450.1	3702.AT3G57000.1	0	0	0	0	0	0.878	0.9	0	0.987
AT5G15750	AT3G21540	630199	621403	3702.AT5G15750.1	3702.AT3G21540.1	0	0	0	0	0	0.878	0.9	0	0.987
AT5G22100	AT4G28450	630804	627468	3702.AT5G22100.1	3702.AT4G28450.1	0	0	0	0	0	0.878	0.9	0	0.987
AT5G15750	AT4G28450	630199	627468	3702.AT5G15750.1	3702.AT4G28450.1	0	0	0	0	0	0.878	0.9	0	0.987
AT5G22100	AT3G21540	630804	621403	3702.AT5G22100.1	3702.AT3G21540.1	0	0	0	0	0	0.878	0.9	0	0.987
AT5G22100	AT3G57000	630804	623910	3702.AT5G22100.1	3702.AT3G57000.1	0	0	0	0	0	0.88	0.9	0	0.987
AT3G21540	AT3G06530	621403	619794	3702.AT3G21540.1	3702.AT3G06530.2	0	0	0	0	0	0.878	0.9	0	0.987
AT4G04940	AT3G57000	625105	623910	3702.AT4G04940.1	3702.AT3G57000.1	0	0	0	0	0	0.878	0.9	0	0.987
AT3G10530	AT1G63810	620173	613137	3702.AT3G10530.1	3702.AT1G63810.1	0	0	0	0	0	0.871	0.9	0	0.986
TOZ	NOP56	630307	612513	3702.AT5G16750.1	3702.AT1G56110.1	0	0	0	0	0	0.857	0.9	0	0.985
AT3G10530	NOP56	620173	612513	3702.AT3G10530.1	3702.AT1G56110.1	0	0	0	0	0	0.857	0.9	0	0.985
AT3G11964	AT3G06530	620332	619794	3702.AT3G11964.1	3702.AT3G06530.2	0	0	0	0	0	0.857	0.9	0	0.985
AT5G15750	AT1G63810	630199	613137	3702.AT5G15750.1	3702.AT1G63810.1	0	0	0	0	0	0.857	0.9	0	0.985
NOP56	PWP2	612513	609393	3702.AT1G56110.1	3702.AT1G15440.1	0	0	0	0	0	0.857	0.9	0	0.985
AT2G18900	AT1G06720	616045	608446	3702.AT2G18900.1	3702.AT1G06720.1	0	0	0	0	0	0.857	0.9	0	0.985
AT5G66540	NOP56	634922	612513	3702.AT5G66540.1	3702.AT1G56110.1	0	0	0	0	0	0.858	0.9	0	0.985
AT5G15750	AT2G18900	630199	616045	3702.AT5G15750.1	3702.AT2G18900.1	0	0	0	0	0	0.857	0.9	0	0.985
AT3G06530	AT2G18900	619794	616045	3702.AT3G06530.2	3702.AT2G18900.1	0	0	0	0	0	0.857	0.9	0	0.985
AT3G11964	PWP2	620332	609393	3702.AT3G11964.1	3702.AT1G15440.1	0	0	0	0	0	0.865	0.9	0	0.985
AT1G63810	PWP2	613137	609393	3702.AT1G63810.1	3702.AT1G15440.1	0	0	0	0	0	0.865	0.9	0	0.985
AT5G66540	AT2G18900	634922	616045	3702.AT5G66540.1	3702.AT2G18900.1	0	0	0	0	0	0.857	0.9	0	0.985
AT3G57000	AT1G63810	623910	613137	3702.AT3G57000.1	3702.AT1G63810.1	0	0	0	0	0	0.857	0.9	0	0.985
AT2G18900	PWP2	616045	609393	3702.AT2G18900.1	3702.AT1G15440.1	0	0	0	0	0	0.857	0.9	0	0.985
AT4G28450	NOP56	627468	612513	3702.AT4G28450.1	3702.AT1G56110.1	0	0	0	0	0	0.857	0.9	0	0.985
AT3G21540	AT3G11964	621403	620332	3702.AT3G21540.1	3702.AT3G11964.1	0	0	0	0	0	0.857	0.9	0	0.985
AT3G21540	AT1G63810	621403	613137	3702.AT3G21540.1	3702.AT1G63810.1	0	0	0	0	0	0.86	0.9	0	0.985
AT4G04940	NOP56	625105	612513	3702.AT4G04940.1	3702.AT1G56110.1	0	0	0	0	0	0.857	0.9	0	0.985
AT3G10530	AT2G18900	620173	616045	3702.AT3G10530.1	3702.AT2G18900.1	0	0	0	0	0	0.857	0.9	0	0.985
AT3G06530	NOP56	619794	612513	3702.AT3G06530.2	3702.AT1G56110.1	0	0	0	0	0	0.857	0.9	0	0.985
AT4G04940	AT1G63810	625105	613137	3702.AT4G04940.1	3702.AT1G63810.1	0	0	0	0	0	0.85	0.9	0	0.984
AT3G06530	AT1G63810	619794	613137	3702.AT3G06530.2	3702.AT1G63810.1	0	0	0	0	0	0.855	0.9	0	0.984
AT5G27120	AT3G06530	631316	619794	3702.AT5G27120.1	3702.AT3G06530.2	0	0	0	0	0	0.839	0.9	0	0.983
AT5G22100	NOP56	630804	612513	3702.AT5G22100.1	3702.AT1G56110.1	0	0	0	0	0	0.84	0.9	0	0.983
AT5G27120	AT4G04940	631316	625105	3702.AT5G27120.1	3702.AT4G04940.1	0	0	0	0	0	0.84	0.9	0	0.983
AT3G21540	AT3G05060	621403	619621	3702.AT3G21540.1	3702.AT3G05060.1	0	0	0	0	0	0.839	0.9	0	0.983
NSN1	AT2G40360	619849	618335	3702.AT3G07050.1	3702.AT2G40360.1	0	0	0	0	0	0.841	0.9	0	0.983
AT1G63810	NOP56	613137	612513	3702.AT1G63810.1	3702.AT1G56110.1	0	0	0	0	0	0.84	0.9	0	0.983
AT4G28450	AT2G18900	627468	616045	3702.AT4G28450.1	3702.AT2G18900.1	0	0	0	0	0	0.84	0.9	0	0.983
TOZ	AT2G18900	630307	616045	3702.AT5G16750.1	3702.AT2G18900.1	0	0	0	0	0	0.84	0.9	0	0.983
AT5G27120	AT5G22100	631316	630804	3702.AT5G27120.1	3702.AT5G22100.1	0	0	0	0	0	0.839	0.9	0	0.983
AT3G10530	AT3G05060	620173	619621	3702.AT3G10530.1	3702.AT3G05060.1	0	0	0	0	0	0.839	0.9	0	0.983
AT5G27120	AT3G21540	631316	621403	3702.AT5G27120.1	3702.AT3G21540.1	0	0	0	0	0	0.839	0.9	0	0.983
AT4G04940	AT2G18900	625105	616045	3702.AT4G04940.1	3702.AT2G18900.1	0	0	0	0	0	0.84	0.9	0	0.983
TOZ	AT3G05060	630307	619621	3702.AT5G16750.1	3702.AT3G05060.1	0	0	0	0	0	0.84	0.9	0	0.983
AT5G27120	AT3G57000	631316	623910	3702.AT5G27120.1	3702.AT3G57000.1	0	0	0	0	0	0.839	0.9	0	0.983
AT5G08600	AT3G06530	629535	619794	3702.AT5G08600.2	3702.AT3G06530.2	0	0	0	0	0	0.839	0.9	0	0.983
AT5G14520	NSN1	630075	619849	3702.AT5G14520.1	3702.AT3G07050.1	0	0	0	0	0	0.845	0.9	0	0.983
AT5G15750	AT3G05060	630199	619621	3702.AT5G15750.1	3702.AT3G05060.1	0	0	0	0	0	0.839	0.9	0	0.983
AT4G04940	AT3G05060	625105	619621	3702.AT4G04940.1	3702.AT3G05060.1	0	0	0	0	0	0.84	0.9	0	0.983
AT3G05060	AT1G06720	619621	608446	3702.AT3G05060.1	3702.AT1G06720.1	0	0	0	0	0	0.839	0.9	0	0.983
AT5G27120	AT4G28450	631316	627468	3702.AT5G27120.1	3702.AT4G28450.1	0	0	0	0	0	0.84	0.9	0	0.983
AT5G27120	AT1G06720	631316	608446	3702.AT5G27120.1	3702.AT1G06720.1	0	0	0	0	0	0.839	0.9	0	0.983
AT5G27120	AT3G10530	631316	620173	3702.AT5G27120.1	3702.AT3G10530.1	0	0	0	0	0	0.839	0.9	0	0.983
AT3G05060	AT1G63810	619621	613137	3702.AT3G05060.1	3702.AT1G63810.1	0	0	0	0	0	0.839	0.9	0	0.983
AT3G06530	AT3G05060	619794	619621	3702.AT3G06530.2	3702.AT3G05060.1	0	0	0	0	0	0.839	0.9	0	0.983
AT3G11964	AT2G18900	620332	616045	3702.AT3G11964.1	3702.AT2G18900.1	0	0	0	0	0	0.84	0.9	0	0.983
AT5G15750	NOP56	630199	612513	3702.AT5G15750.1	3702.AT1G56110.1	0	0	0	0	0	0.84	0.9	0	0.983
AT3G57000	AT2G18900	623910	616045	3702.AT3G57000.1	3702.AT2G18900.1	0	0	0	0	0	0.84	0.9	0	0.983
AT3G21540	NOP56	621403	612513	3702.AT3G21540.1	3702.AT1G56110.1	0	0	0	0	0	0.84	0.9	0	0.983
AT3G21540	AT2G18900	621403	616045	3702.AT3G21540.1	3702.AT2G18900.1	0	0	0	0	0	0.84	0.9	0	0.983
AT5G08600	AT4G28450	629535	627468	3702.AT5G08600.2	3702.AT4G28450.1	0	0	0	0	0	0.84	0.9	0	0.983
SGT1A	CR88	626937	615213	3702.AT4G23570.3	3702.AT2G04030.1	0	0	0	0	0	0.92	0.8	0	0.983
AT4G28450	AT3G05060	627468	619621	3702.AT4G28450.1	3702.AT3G05060.1	0	0	0	0	0	0.84	0.9	0	0.983
AT5G27120	AT5G15750	631316	630199	3702.AT5G27120.1	3702.AT5G15750.1	0	0	0	0	0	0.839	0.9	0	0.983
AT5G66540	AT3G05060	634922	619621	3702.AT5G66540.1	3702.AT3G05060.1	0	0	0	0	0	0.84	0.9	0	0.983
AT3G57000	AT3G05060	623910	619621	3702.AT3G57000.1	3702.AT3G05060.1	0	0	0	0	0	0.839	0.9	0	0.983
AT3G57000	NOP56	623910	612513	3702.AT3G57000.1	3702.AT1G56110.1	0	0	0	0	0	0.84	0.9	0	0.983
AT5G27120	AT1G63810	631316	613137	3702.AT5G27120.1	3702.AT1G63810.1	0	0	0	0	0	0.839	0.9	0	0.983
AT5G22100	AT2G18900	630804	616045	3702.AT5G22100.1	3702.AT2G18900.1	0	0	0	0	0	0.84	0.9	0	0.983
AT5G27120	TOZ	631316	630307	3702.AT5G27120.1	3702.AT5G16750.1	0	0	0	0	0	0.84	0.9	0	0.983
AT5G27120	PWP2	631316	609393	3702.AT5G27120.1	3702.AT1G15440.1	0	0	0	0	0	0.839	0.9	0	0.983
AT5G22100	AT3G05060	630804	619621	3702.AT5G22100.1	3702.AT3G05060.1	0	0	0	0	0	0.839	0.9	0	0.983
NOP56	AT1G06720	612513	608446	3702.AT1G56110.1	3702.AT1G06720.1	0	0	0	0	0	0.841	0.9	0	0.983
AT3G05060	PWP2	619621	609393	3702.AT3G05060.1	3702.AT1G15440.1	0	0	0	0	0	0.839	0.9	0	0.983
AT5G66540	AT5G08600	634922	629535	3702.AT5G66540.1	3702.AT5G08600.2	0	0	0	0	0	0.84	0.9	0	0.983
AT5G66540	AT5G27120	634922	631316	3702.AT5G66540.1	3702.AT5G27120.1	0	0	0	0	0	0.84	0.9	0	0.983
TOZ	AT5G08600	630307	629535	3702.AT5G16750.1	3702.AT5G08600.2	0	0	0	0	0	0.836	0.9	0	0.982
AT5G08600	AT3G11964	629535	620332	3702.AT5G08600.2	3702.AT3G11964.1	0	0	0	0	0	0.828	0.9	0	0.982
AT5G27120	AT3G11964	631316	620332	3702.AT5G27120.1	3702.AT3G11964.1	0	0	0	0	0	0.835	0.9	0	0.982
AT2G18900	AT1G63810	616045	613137	3702.AT2G18900.1	3702.AT1G63810.1	0	0	0	0	0	0.835	0.9	0	0.982
AT5G08600	AT4G04940	629535	625105	3702.AT5G08600.2	3702.AT4G04940.1	0	0	0	0	0	0.835	0.9	0	0.982
AT5G66540	AT3G09720	634922	620081	3702.AT5G66540.1	3702.AT3G09720.1	0	0	0	0	0	0.828	0.9	0	0.982
AT2G18900	NOP56	616045	612513	3702.AT2G18900.1	3702.AT1G56110.1	0	0	0	0	0	0.831	0.9	0	0.982
AT5G08600	AT1G63810	629535	613137	3702.AT5G08600.2	3702.AT1G63810.1	0	0	0	0	0	0.835	0.9	0	0.982
AT3G11964	AT1G06720	620332	608446	3702.AT3G11964.1	3702.AT1G06720.1	0	0	0	0	0	0.835	0.9	0	0.982
AT3G05060	AT2G18900	619621	616045	3702.AT3G05060.1	3702.AT2G18900.1	0	0	0	0	0	0.83	0.9	0	0.982
AT3G11964	AT1G63810	620332	613137	3702.AT3G11964.1	3702.AT1G63810.1	0	0	0	0	0	0.835	0.9	0	0.982
AT3G05060	NOP56	619621	612513	3702.AT3G05060.1	3702.AT1G56110.1	0	0	0	0.896	0	0.832	0.9	0	0.982
AT3G57000	AT3G11964	623910	620332	3702.AT3G57000.1	3702.AT3G11964.1	0	0	0	0	0	0.828	0.9	0	0.982
AT1G63810	AT1G06720	613137	608446	3702.AT1G63810.1	3702.AT1G06720.1	0	0	0	0	0	0.828	0.9	0	0.982
AT5G08600	AT1G06720	629535	608446	3702.AT5G08600.2	3702.AT1G06720.1	0	0	0	0	0	0.835	0.9	0	0.982
AT5G08600	AT3G10530	629535	620173	3702.AT5G08600.2	3702.AT3G10530.1	0	0	0	0	0	0.835	0.9	0	0.982
AT5G08600	PWP2	629535	609393	3702.AT5G08600.2	3702.AT1G15440.1	0	0	0	0	0	0.835	0.9	0	0.982
AT5G15750	AT5G08600	630199	629535	3702.AT5G15750.1	3702.AT5G08600.2	0	0	0	0	0	0.835	0.9	0	0.982
AT4G28450	AT3G11964	627468	620332	3702.AT4G28450.1	3702.AT3G11964.1	0	0	0	0	0	0.831	0.9	0	0.982
AT5G08600	NOP56	629535	612513	3702.AT5G08600.2	3702.AT1G56110.1	0	0	0	0	0	0.83	0.9	0	0.982
AT5G08600	AT3G57000	629535	623910	3702.AT5G08600.2	3702.AT3G57000.1	0	0	0	0	0	0.835	0.9	0	0.982
AT5G08600	AT3G21540	629535	621403	3702.AT5G08600.2	3702.AT3G21540.1	0	0	0	0	0	0.835	0.9	0	0.982
AT3G11964	AT3G10530	620332	620173	3702.AT3G11964.1	3702.AT3G10530.1	0	0	0	0	0	0.834	0.9	0	0.982
AT4G04940	AT3G11964	625105	620332	3702.AT4G04940.1	3702.AT3G11964.1	0	0	0	0	0	0.835	0.9	0	0.982
TOZ	AT3G11964	630307	620332	3702.AT5G16750.1	3702.AT3G11964.1	0	0	0	0	0	0.834	0.9	0	0.982
AT5G27120	NOP56	631316	612513	3702.AT5G27120.1	3702.AT1G56110.1	0	0	0	0.897	0	0.832	0.9	0	0.982
AT5G27120	AT2G18900	631316	616045	3702.AT5G27120.1	3702.AT2G18900.1	0	0	0	0	0	0.83	0.9	0	0.982
AT5G22100	AT5G08600	630804	629535	3702.AT5G22100.1	3702.AT5G08600.2	0	0	0	0	0	0.835	0.9	0	0.982
AT3G11964	AT3G05060	620332	619621	3702.AT3G11964.1	3702.AT3G05060.1	0	0	0	0	0	0.835	0.9	0	0.982
AT4G13170	RPL3B	625749	612904	3702.AT4G13170.1	3702.AT1G61580.1	0	0	0	0	0	0.826	0.9	0	0.981
AT5G27120	AT5G08600	631316	629535	3702.AT5G27120.1	3702.AT5G08600.2	0	0	0	0	0	0.812	0.9	0	0.98
AT5G15750	AT3G11964	630199	620332	3702.AT5G15750.1	3702.AT3G11964.1	0	0	0	0	0	0.812	0.9	0	0.98
AT5G15550	NSN1	630178	619849	3702.AT5G15550.1	3702.AT3G07050.1	0	0	0	0	0	0.809	0.9	0	0.98
AT5G22100	AT3G11964	630804	620332	3702.AT5G22100.1	3702.AT3G11964.1	0	0	0	0	0	0.812	0.9	0	0.98
AT4G28450	AT1G63810	627468	613137	3702.AT4G28450.1	3702.AT1G63810.1	0	0	0	0	0	0.812	0.9	0	0.98
AT3G11964	NOP56	620332	612513	3702.AT3G11964.1	3702.AT1G56110.1	0	0	0	0	0	0.809	0.9	0	0.98
AT5G22100	AT1G63810	630804	613137	3702.AT5G22100.1	3702.AT1G63810.1	0	0	0	0	0	0.812	0.9	0	0.98
AT5G08600	AT2G18900	629535	616045	3702.AT5G08600.2	3702.AT2G18900.1	0	0	0	0	0	0.811	0.9	0	0.98
AT5G08600	AT3G05060	629535	619621	3702.AT5G08600.2	3702.AT3G05060.1	0	0	0	0	0	0.812	0.9	0	0.98
AT4G30990	AT1G63810	627744	613137	3702.AT4G30990.2	3702.AT1G63810.1	0	0	0	0	0	0.81	0.9	0	0.98
AT1G63660	AT1G16350	613124	609484	3702.AT1G63660.1	3702.AT1G16350.1	0	0	0	0	0	0.808	0.9	0	0.979
AT3G57490	RPL3B	623961	612904	3702.AT3G57490.1	3702.AT1G61580.1	0	0	0	0	0	0.779	0.9	0	0.976
HSP90.1	HSFA2	633425	616809	3702.AT5G52640.1	3702.AT2G26150.1	0	0	0	0	0	0.766	0.9	0	0.975
HSP81-3	SGT1A	633796	626937	3702.AT5G56010.1	3702.AT4G23570.3	0	0	0	0	0	0.732	0.9	0	0.972
AT3G09720	AT1G63810	620081	613137	3702.AT3G09720.1	3702.AT1G63810.1	0	0	0	0	0	0.732	0.9	0	0.972
AT4G30990	AT3G05060	627744	619621	3702.AT4G30990.2	3702.AT3G05060.1	0	0	0	0	0	0.726	0.9	0	0.971
AT5G27120	AT4G30990	631316	627744	3702.AT5G27120.1	3702.AT4G30990.2	0	0	0	0	0	0.726	0.9	0	0.971
AT4G13170	AT3G57490	625749	623961	3702.AT4G13170.1	3702.AT3G57490.1	0	0	0	0	0	0.73	0.9	0	0.971
AT4G30990	AT4G28450	627744	627468	3702.AT4G30990.2	3702.AT4G28450.1	0	0	0	0	0	0.711	0.9	0	0.969
HSP81-3	Hop3	633796	625668	3702.AT5G56010.1	3702.AT4G12400.2	0	0	0	0	0	0.697	0.9	0	0.968
HSP90.1	Hop3	633425	625668	3702.AT5G52640.1	3702.AT4G12400.2	0	0	0	0	0	0.697	0.9	0	0.968
HSP90.1	AT3G09440	633425	620055	3702.AT5G52640.1	3702.AT3G09440.1	0	0	0	0	0	0.655	0.9	0	0.964
HSP81-3	Hsp70-2	633796	628884	3702.AT5G56010.1	3702.AT5G02490.1	0	0	0	0	0	0.655	0.9	0	0.964
HSP90.1	Hsp70b	633425	609455	3702.AT5G52640.1	3702.AT1G16030.1	0	0	0	0	0	0.655	0.9	0	0.964
HSP90.1	Hsp70-2	633425	628884	3702.AT5G52640.1	3702.AT5G02490.1	0	0	0	0	0	0.655	0.9	0	0.964
HSP90.1	HSP70	633425	620395	3702.AT5G52640.1	3702.AT3G12580.1	0	0	0	0	0	0.655	0.9	0	0.964
HSP81-3	AT3G09440	633796	620055	3702.AT5G56010.1	3702.AT3G09440.1	0	0	0	0	0	0.655	0.9	0	0.964
HSP81-3	HSP70	633796	620395	3702.AT5G56010.1	3702.AT3G12580.1	0	0	0	0	0	0.655	0.9	0	0.964
HSP81-3	Hsp70b	633796	609455	3702.AT5G56010.1	3702.AT1G16030.1	0	0	0	0	0	0.655	0.9	0	0.964
TOZ	AT4G30990	630307	627744	3702.AT5G16750.1	3702.AT4G30990.2	0	0	0	0	0	0.603	0.9	0	0.958
AT4G30990	AT4G04940	627744	625105	3702.AT4G30990.2	3702.AT4G04940.1	0	0	0	0	0	0.603	0.9	0	0.958
AT5G22100	AT4G30990	630804	627744	3702.AT5G22100.1	3702.AT4G30990.2	0	0	0	0	0	0.603	0.9	0	0.958
AT4G30990	AT1G06720	627744	608446	3702.AT4G30990.2	3702.AT1G06720.1	0	0	0	0	0	0.603	0.9	0	0.958
AT4G30990	AT3G06530	627744	619794	3702.AT4G30990.2	3702.AT3G06530.2	0	0	0	0	0	0.603	0.9	0	0.958
HSP81-3	HSP90.1	633796	633425	3702.AT5G56010.1	3702.AT5G52640.1	0	0	0	0.984	0	0.559	0.9	0	0.954
SPA1	SPA4	618970	612185	3702.AT2G46340.1	3702.AT1G53090.2	0	0	0	0.889	0	0.566	0.9	0	0.954
ADC2	ARGAH2	628155	625298	3702.AT4G34710.1	3702.AT4G08870.1	0	0	0	0	0	0.556	0.9	0	0.953
TT4	TT5	630014	623713	3702.AT5G13930.1	3702.AT3G55120.1	0	0	0	0	0	0.558	0.9	0	0.953
AT3G09720	AT3G05060	620081	619621	3702.AT3G09720.1	3702.AT3G05060.1	0	0	0	0	0	0.547	0.9	0	0.952
AT5G27120	AT3G09720	631316	620081	3702.AT5G27120.1	3702.AT3G09720.1	0	0	0	0	0	0.547	0.9	0	0.952
PHYB	PIF3	616034	608747	3702.AT2G18790.1	3702.AT1G09530.2	0	0	0	0	0	0.765	0.8	0	0.95
CRY1	SPA1	625306	618970	3702.AT4G08920.1	3702.AT2G46340.1	0	0	0	0	0	0.765	0.8	0	0.95
ZTL	GI	633942	610142	3702.AT5G57360.2	3702.AT1G22770.1	0	0	0	0	0	0.765	0.8	0	0.95
AT5G15750	AT3G57490	630199	623961	3702.AT5G15750.1	3702.AT3G57490.1	0	0	0	0	0	0.524	0.9	0	0.95
PHYA	PIF3	608751	608747	3702.AT1G09570.1	3702.AT1G09530.2	0	0	0	0	0	0.765	0.8	0	0.95
AT4G30990	NOP56	627744	612513	3702.AT4G30990.2	3702.AT1G56110.1	0	0	0	0	0	0.511	0.9	0	0.949
PIF4	PIF3	618619	608747	3702.AT2G43010.1	3702.AT1G09530.2	0	0	0	0.652	0	0.752	0.8	0	0.948
FKF1	GI	613591	610142	3702.AT1G68050.1	3702.AT1G22770.1	0	0	0	0	0	0.752	0.8	0	0.948
AT3G57490	AT3G11964	623961	620332	3702.AT3G57490.1	3702.AT3G11964.1	0	0	0	0	0	0.477	0.9	0	0.945
RPC14	NRPA2	617158	610798	3702.AT2G29540.3	3702.AT1G29940.1	0	0	0	0	0	0.944	0	0	0.944
SPDS3	SPDS1	633478	610253	3702.AT5G53120.6	3702.AT1G23820.1	0	0	0	0.951	0	0.715	0.8	0	0.94
SPA1	CRY2	618970	608194	3702.AT2G46340.1	3702.AT1G04400.1	0	0	0	0	0	0.715	0.8	0	0.94
AT3G09440	Hsp70-15	620055	614810	3702.AT3G09440.1	3702.AT1G79920.1	0	0	0	0.779	0	0.416	0.9	0	0.939
HSP70	Hsp70-15	620395	614810	3702.AT3G12580.1	3702.AT1G79920.1	0	0	0	0.775	0	0.416	0.9	0	0.939
MEE49	AT1G29320	624780	610735	3702.AT4G01560.1	3702.AT1G29320.1	0	0	0	0	0	0.939	0	0	0.939
Hsp70-15	Hsp70b	614810	609455	3702.AT1G79920.1	3702.AT1G16030.1	0	0	0	0.785	0	0.416	0.9	0	0.939
Hsp70-2	Hsp70-15	628884	614810	3702.AT5G02490.1	3702.AT1G79920.1	0	0	0	0.763	0	0.416	0.9	0	0.939
BCAT3	AT3G23940	623127	621672	3702.AT3G49680.1	3702.AT3G23940.1	0	0	0	0	0	0.41	0.9	0	0.938
AT3G57940	PWP2	624006	609393	3702.AT3G57940.1	3702.AT1G15440.1	0	0	0	0	0	0.857	0.54	0	0.931
AT3G21540	AT1G31660	621403	610973	3702.AT3G21540.1	3702.AT1G31660.1	0	0	0	0	0	0.931	0	0	0.931
AT4G30990	AT3G10530	627744	620173	3702.AT4G30990.2	3702.AT3G10530.1	0	0	0	0	0	0.338	0.9	0	0.93
AT4G30990	PWP2	627744	609393	3702.AT4G30990.2	3702.AT1G15440.1	0	0	0	0	0	0.338	0.9	0	0.93
Hop3	HSP70	625668	620395	3702.AT4G12400.2	3702.AT3G12580.1	0	0	0	0	0	0.325	0.9	0	0.929
PDIL1-1	CRT3	610035	608634	3702.AT1G21750.1	3702.AT1G08450.1	0	0	0	0	0	0.322	0.9	0	0.929
MPK3	MKK4	622703	612032	3702.AT3G45640.1	3702.AT1G51660.1	0	0	0	0.647	0	0.664	0.8	0	0.929
Hsp70-2	Hop3	628884	625668	3702.AT5G02490.1	3702.AT4G12400.2	0	0	0	0	0	0.325	0.9	0	0.929
Hop3	Hsp70b	625668	609455	3702.AT4G12400.2	3702.AT1G16030.1	0	0	0	0	0	0.325	0.9	0	0.929
Hop3	AT3G09440	625668	620055	3702.AT4G12400.2	3702.AT3G09440.1	0	0	0	0	0	0.325	0.9	0	0.929
BIP2	Hsp70-2	632249	628884	3702.AT5G42020.1	3702.AT5G02490.1	0	0	0	0.965	0	0.318	0.9	0	0.928
BIP2	Hsp70b	632249	609455	3702.AT5G42020.1	3702.AT1G16030.1	0	0	0	0.965	0	0.318	0.9	0	0.928
BIP2	HSP70	632249	620395	3702.AT5G42020.1	3702.AT3G12580.1	0	0	0	0.965	0	0.318	0.9	0	0.928
BIP2	AT3G09440	632249	620055	3702.AT5G42020.1	3702.AT3G09440.1	0	0	0	0.966	0	0.318	0.9	0	0.928
AT4G30990	AT3G21540	627744	621403	3702.AT4G30990.2	3702.AT3G21540.1	0	0	0	0	0	0.312	0.9	0	0.928
NOP56	NUC-L1	612513	611760	3702.AT1G56110.1	3702.AT1G48920.1	0	0	0	0	0	0.302	0.9	0	0.927
AT3G09720	PWP2	620081	609393	3702.AT3G09720.1	3702.AT1G15440.1	0	0	0	0	0	0.272	0.9	0	0.924
AT4G28450	AT3G09720	627468	620081	3702.AT4G28450.1	3702.AT3G09720.1	0	0	0	0	0	0.273	0.9	0	0.924
AT4G30990	AT2G18900	627744	616045	3702.AT4G30990.2	3702.AT2G18900.1	0	0	0	0	0	0.268	0.9	0	0.923
AT3G05060	NUC-L1	619621	611760	3702.AT3G05060.1	3702.AT1G48920.1	0	0	0	0	0	0.27	0.9	0	0.923
AT5G27120	NUC-L1	631316	611760	3702.AT5G27120.1	3702.AT1G48920.1	0	0	0	0	0	0.27	0.9	0	0.923
AT3G11964	AT3G09720	620332	620081	3702.AT3G11964.1	3702.AT3G09720.1	0	0	0	0	0	0.271	0.9	0	0.923
AT3G57940	AT3G06530	624006	619794	3702.AT3G57940.1	3702.AT3G06530.2	0	0	0	0	0	0.84	0.54	0	0.923
AT-HSFB2B	HSP70	625592	620395	3702.AT4G11660.1	3702.AT3G12580.1	0	0	0	0	0	0.256	0.9	0	0.922
HSFA7A	HSP70	623371	620395	3702.AT3G51910.1	3702.AT3G12580.1	0	0	0	0	0	0.256	0.9	0	0.922
Hsp70-2	AT-HSFB2B	628884	625592	3702.AT5G02490.1	3702.AT4G11660.1	0	0	0	0	0	0.256	0.9	0	0.922
AT-HSFB2B	Hsp70b	625592	609455	3702.AT4G11660.1	3702.AT1G16030.1	0	0	0	0	0	0.256	0.9	0	0.922
HSP70	HSFA8	620395	613583	3702.AT3G12580.1	3702.AT1G67970.1	0	0	0	0	0	0.256	0.9	0	0.922
AT5G08180	NAP57	629485	623927	3702.AT5G08180.2	3702.AT3G57150.1	0	0	0	0	0	0.838	0.54	0	0.922
HSFA4A	HSP70	626431	620395	3702.AT4G18880.1	3702.AT3G12580.1	0	0	0	0	0	0.256	0.9	0	0.922
HSP70	HSFA2	620395	616809	3702.AT3G12580.1	3702.AT2G26150.1	0	0	0	0	0	0.256	0.9	0	0.922
HSFA2	Hsp70b	616809	609455	3702.AT2G26150.1	3702.AT1G16030.1	0	0	0	0	0	0.256	0.9	0	0.922
HSF4	AT3G09440	628396	620055	3702.AT4G36990.1	3702.AT3G09440.1	0	0	0	0	0	0.256	0.9	0	0.922
HSFB2A	AT3G09440	634433	620055	3702.AT5G62020.1	3702.AT3G09440.1	0	0	0	0	0	0.256	0.9	0	0.922
HSFB2A	Hsp70b	634433	609455	3702.AT5G62020.1	3702.AT1G16030.1	0	0	0	0	0	0.256	0.9	0	0.922
HSFA7A	Hsp70b	623371	609455	3702.AT3G51910.1	3702.AT1G16030.1	0	0	0	0	0	0.256	0.9	0	0.922
AT3G09440	HSFA8	620055	613583	3702.AT3G09440.1	3702.AT1G67970.1	0	0	0	0	0	0.256	0.9	0	0.922
AT3G09440	HSFA2	620055	616809	3702.AT3G09440.1	3702.AT2G26150.1	0	0	0	0	0	0.256	0.9	0	0.922
HSFA4A	AT3G09440	626431	620055	3702.AT4G18880.1	3702.AT3G09440.1	0	0	0	0	0	0.256	0.9	0	0.922
HSF4	Hsp70b	628396	609455	3702.AT4G36990.1	3702.AT1G16030.1	0	0	0	0	0	0.256	0.9	0	0.922
Hsp70-2	HSFA2	628884	616809	3702.AT5G02490.1	3702.AT2G26150.1	0	0	0	0	0	0.256	0.9	0	0.922
HSFB2A	Hsp70-2	634433	628884	3702.AT5G62020.1	3702.AT5G02490.1	0	0	0	0	0	0.256	0.9	0	0.922
HSFA8	Hsp70b	613583	609455	3702.AT1G67970.1	3702.AT1G16030.1	0	0	0	0	0	0.256	0.9	0	0.922
HSFA7A	AT3G09440	623371	620055	3702.AT3G51910.1	3702.AT3G09440.1	0	0	0	0	0	0.256	0.9	0	0.922
Hsp70-2	HSFA4A	628884	626431	3702.AT5G02490.1	3702.AT4G18880.1	0	0	0	0	0	0.256	0.9	0	0.922
HSFA4A	Hsp70b	626431	609455	3702.AT4G18880.1	3702.AT1G16030.1	0	0	0	0	0	0.256	0.9	0	0.922
Hsp70-2	HSF4	628884	628396	3702.AT5G02490.1	3702.AT4G36990.1	0	0	0	0	0	0.256	0.9	0	0.922
AT-HSFB2B	AT3G09440	625592	620055	3702.AT4G11660.1	3702.AT3G09440.1	0	0	0	0	0	0.256	0.9	0	0.922
Hsp70-2	HSFA8	628884	613583	3702.AT5G02490.1	3702.AT1G67970.1	0	0	0	0	0	0.256	0.9	0	0.922
HSF4	HSP70	628396	620395	3702.AT4G36990.1	3702.AT3G12580.1	0	0	0	0	0	0.256	0.9	0	0.922
HSFB2A	HSP70	634433	620395	3702.AT5G62020.1	3702.AT3G12580.1	0	0	0	0	0	0.256	0.9	0	0.922
Hsp70-2	HSFA7A	628884	623371	3702.AT5G02490.1	3702.AT3G51910.1	0	0	0	0	0	0.256	0.9	0	0.922
AT3G09720	NOP56	620081	612513	3702.AT3G09720.1	3702.AT1G56110.1	0	0	0	0	0	0.241	0.9	0	0.92
DIN4	AT3G05640	620504	619688	3702.AT3G13450.1	3702.AT3G05640.1	0	0	0	0	0	0.239	0.9	0	0.92
EDA7	AT1G63810	623909	613137	3702.AT3G56990.1	3702.AT1G63810.1	0	0	0	0	0	0.919	0	0	0.919
HSP81-3	HSFA2	633796	616809	3702.AT5G56010.1	3702.AT2G26150.1	0	0	0	0	0	0.213	0.9	0	0.917
HSP81-3	HSFA7A	633796	623371	3702.AT5G56010.1	3702.AT3G51910.1	0	0	0	0	0	0.213	0.9	0	0.917
HSP90.1	HSFA4A	633425	626431	3702.AT5G52640.1	3702.AT4G18880.1	0	0	0	0	0	0.213	0.9	0	0.917
HSP81-3	HSFA8	633796	613583	3702.AT5G56010.1	3702.AT1G67970.1	0	0	0	0	0	0.213	0.9	0	0.917
HSFB2A	HSP90.1	634433	633425	3702.AT5G62020.1	3702.AT5G52640.1	0	0	0	0	0	0.213	0.9	0	0.917
HSP81-3	HSFA4A	633796	626431	3702.AT5G56010.1	3702.AT4G18880.1	0	0	0	0	0	0.213	0.9	0	0.917
MPK3	S6K2	622703	619978	3702.AT3G45640.1	3702.AT3G08720.2	0	0	0	0.624	0	0.211	0.9	0	0.917
HSP81-3	HSF4	633796	628396	3702.AT5G56010.1	3702.AT4G36990.1	0	0	0	0	0	0.213	0.9	0	0.917
HSP90.1	HSF4	633425	628396	3702.AT5G52640.1	3702.AT4G36990.1	0	0	0	0	0	0.213	0.9	0	0.917
HSFB2A	HSP81-3	634433	633796	3702.AT5G62020.1	3702.AT5G56010.1	0	0	0	0	0	0.213	0.9	0	0.917
HSP90.1	HSFA7A	633425	623371	3702.AT5G52640.1	3702.AT3G51910.1	0	0	0	0	0	0.213	0.9	0	0.917
HSP90.1	AT-HSFB2B	633425	625592	3702.AT5G52640.1	3702.AT4G11660.1	0	0	0	0	0	0.213	0.9	0	0.917
HSP90.1	HSFA8	633425	613583	3702.AT5G52640.1	3702.AT1G67970.1	0	0	0	0	0	0.213	0.9	0	0.917
HSP81-3	AT-HSFB2B	633796	625592	3702.AT5G56010.1	3702.AT4G11660.1	0	0	0	0	0	0.213	0.9	0	0.917
MTHSC70-2	AT3G09440	629597	620055	3702.AT5G09590.1	3702.AT3G09440.1	0	0	0	0.925	0	0.186	0.9	0	0.915
mtHsc70-1	Hsp70b	628494	609455	3702.AT4G37910.1	3702.AT1G16030.1	0	0	0	0.921	0	0.186	0.9	0	0.915
mtHsc70-1	HSP70	628494	620395	3702.AT4G37910.1	3702.AT3G12580.1	0	0	0	0.923	0	0.186	0.9	0	0.915
mtHsc70-1	AT3G09440	628494	620055	3702.AT4G37910.1	3702.AT3G09440.1	0	0	0	0.922	0	0.186	0.9	0	0.915
MTHSC70-2	Hsp70b	629597	609455	3702.AT5G09590.1	3702.AT1G16030.1	0	0	0	0.923	0	0.186	0.9	0	0.915
MTHSC70-2	HSP70	629597	620395	3702.AT5G09590.1	3702.AT3G12580.1	0	0	0	0.924	0	0.186	0.9	0	0.915
MTHSC70-2	Hsp70-2	629597	628884	3702.AT5G09590.1	3702.AT5G02490.1	0	0	0	0.925	0	0.186	0.9	0	0.915
Hsp70-2	mtHsc70-1	628884	628494	3702.AT5G02490.1	3702.AT4G37910.1	0	0	0	0.921	0	0.186	0.9	0	0.915
RPL3B	PAB8	612904	611842	3702.AT1G61580.1	3702.AT1G49760.1	0	0	0	0	0	0.183	0.9	0	0.914
PSAF	PSAD-2	610943	608069	3702.AT1G31330.1	3702.AT1G03130.1	0	0	0	0	0	0.872	0.36	0	0.914
TCH2	PHS2	631798	622844	3702.AT5G37770.1	3702.AT3G46970.1	0	0	0	0	0	0.172	0.9	0	0.913
HSP90.1	ROC1	633425	628579	3702.AT5G52640.1	3702.AT4G38740.1	0	0	0	0	0	0.169	0.9	0	0.913
ROC1	AT1G51380	628579	612001	3702.AT4G38740.1	3702.AT1G51380.1	0	0	0	0	0	0.175	0.9	0	0.913
HSP81-3	ROC1	633796	628579	3702.AT5G56010.1	3702.AT4G38740.1	0	0	0	0	0	0.169	0.9	0	0.913
TCH2	PFK3	631798	627229	3702.AT5G37770.1	3702.AT4G26270.1	0	0	0	0	0	0.158	0.9	0	0.912
AT3G57490	AT1G63810	623961	613137	3702.AT3G57490.1	3702.AT1G63810.1	0	0	0	0	0	0.157	0.9	0	0.912
NIA1	NIA2	614589	611395	3702.AT1G77760.1	3702.AT1G37130.1	0	0	0	0.98	0	0.158	0.9	0	0.912
SYP122	SYP121	623425	620315	3702.AT3G52400.1	3702.AT3G11820.1	0	0	0	0.961	0	0.158	0.9	0	0.912
RPL3B	AT1G51380	612904	612001	3702.AT1G61580.1	3702.AT1G51380.1	0	0	0	0	0	0.155	0.9	0	0.911
AT3G57490	AT3G05060	623961	619621	3702.AT3G57490.1	3702.AT3G05060.1	0	0	0	0	0	0.148	0.9	0	0.911
AT3G57490	NOP56	623961	612513	3702.AT3G57490.1	3702.AT1G56110.1	0	0	0	0	0	0.148	0.9	0	0.911
AT5G27120	AT3G57490	631316	623961	3702.AT5G27120.1	3702.AT3G57490.1	0	0	0	0	0	0.148	0.9	0	0.911
TCH2	ROC1	631798	628579	3702.AT5G37770.1	3702.AT4G38740.1	0	0	0	0	0	0.14	0.9	0	0.91
MAT3	MGL	617957	613231	3702.AT2G36880.2	3702.AT1G64660.1	0	0	0	0	0	0.133	0.9	0	0.909
AT4G30990	AT3G57490	627744	623961	3702.AT4G30990.2	3702.AT3G57490.1	0	0	0	0	0	0.128	0.9	0	0.909
ASN2	AT4G24830	634754	627072	3702.AT5G65010.2	3702.AT4G24830.1	0	0	0	0	0	0.132	0.9	0	0.909
AT4G24830	ASN1	627072	622874	3702.AT4G24830.1	3702.AT3G47340.1	0	0	0	0	0	0.132	0.9	0	0.909
AT3G10300	ANNAT3	620146	618161	3702.AT3G10300.3	3702.AT2G38760.1	0	0	0	0	0	0.129	0.9	0	0.909
AT5G66540	AT3G57490	634922	623961	3702.AT5G66540.1	3702.AT3G57490.1	0	0	0	0	0	0.127	0.9	0	0.908
AT4G13170	AT1G51380	625749	612001	3702.AT4G13170.1	3702.AT1G51380.1	0	0	0	0	0	0.121	0.9	0	0.908
HSFA8	GRF11	613583	611259	3702.AT1G67970.1	3702.AT1G34760.1	0	0	0	0	0	0.122	0.9	0	0.908
HSF4	GRF11	628396	611259	3702.AT4G36990.1	3702.AT1G34760.1	0	0	0	0	0	0.122	0.9	0	0.908
mtHsc70-1	Hsp70-15	628494	614810	3702.AT4G37910.1	3702.AT1G79920.1	0	0	0	0.714	0	0.121	0.9	0	0.908
HSFA2	GRF11	616809	611259	3702.AT2G26150.1	3702.AT1G34760.1	0	0	0	0	0	0.122	0.9	0	0.908
HSP81-3	TCH2	633796	631798	3702.AT5G56010.1	3702.AT5G37770.1	0	0	0	0	0	0.121	0.9	0	0.908
HSP90.1	TCH2	633425	631798	3702.AT5G52640.1	3702.AT5G37770.1	0	0	0	0	0	0.121	0.9	0	0.908
AT5G66540	EDA7	634922	623909	3702.AT5G66540.1	3702.AT3G56990.1	0	0	0	0	0	0.908	0	0	0.908
HSFA4A	GRF11	626431	611259	3702.AT4G18880.1	3702.AT1G34760.1	0	0	0	0	0	0.122	0.9	0	0.908
HSFB2A	GRF11	634433	611259	3702.AT5G62020.1	3702.AT1G34760.1	0	0	0	0	0	0.122	0.9	0	0.908
AT-HSFB2B	GRF11	625592	611259	3702.AT4G11660.1	3702.AT1G34760.1	0	0	0	0	0	0.122	0.9	0	0.908
HSFA7A	GRF11	623371	611259	3702.AT3G51910.1	3702.AT1G34760.1	0	0	0	0	0	0.122	0.9	0	0.908
MTHSC70-2	Hsp70-15	629597	614810	3702.AT5G09590.1	3702.AT1G79920.1	0	0	0	0.713	0	0.121	0.9	0	0.908
BIP2	Hsp70-15	632249	614810	3702.AT5G42020.1	3702.AT1G79920.1	0	0	0	0.767	0	0.116	0.9	0	0.907
Hsp70-2	ROC1	628884	628579	3702.AT5G02490.1	3702.AT4G38740.1	0	0	0	0	0	0.115	0.9	0	0.907
ROC1	AT3G09440	628579	620055	3702.AT4G38740.1	3702.AT3G09440.1	0	0	0	0	0	0.115	0.9	0	0.907
AT1G51380	PAB8	612001	611842	3702.AT1G51380.1	3702.AT1G49760.1	0	0	0	0	0	0.114	0.9	0	0.907
ROC1	HSP70	628579	620395	3702.AT4G38740.1	3702.AT3G12580.1	0	0	0	0	0	0.115	0.9	0	0.907
HY5	SPA1	629775	618970	3702.AT5G11260.1	3702.AT2G46340.1	0	0	0	0	0	0.558	0.8	0	0.907
ROC1	Hsp70b	628579	609455	3702.AT4G38740.1	3702.AT1G16030.1	0	0	0	0	0	0.115	0.9	0	0.907
AT5G66540	AT4G30990	634922	627744	3702.AT5G66540.1	3702.AT4G30990.2	0	0	0	0	0	0.108	0.9	0	0.906
AT4G30990	AT3G11964	627744	620332	3702.AT4G30990.2	3702.AT3G11964.1	0	0	0	0	0	0.1	0.9	0	0.906
MPK19	AT3G01490	620655	619228	3702.AT3G14720.1	3702.AT3G01490.1	0	0	0	0.572	0	0.108	0.9	0	0.906
PAO2	SPDS1	618621	610253	3702.AT2G43020.1	3702.AT1G23820.1	0	0	0	0	0	0.094	0.9	0	0.905
PFK3	PHS2	627229	622844	3702.AT4G26270.1	3702.AT3G46970.1	0	0	0	0	0	0.097	0.9	0	0.905
DER1	RMA2	627566	627446	3702.AT4G29330.1	3702.AT4G28270.1	0	0	0	0	0	0.093	0.9	0	0.905
SPDS3	PAO2	633478	618621	3702.AT5G53120.6	3702.AT2G43020.1	0	0	0	0	0	0.094	0.9	0	0.905
Hsp70-2	FBA6	628884	617912	3702.AT5G02490.1	3702.AT2G36460.1	0	0	0	0	0	0.082	0.9	0	0.904
AT1G66500	AT1G51380	613426	612001	3702.AT1G66500.1	3702.AT1G51380.1	0	0	0	0	0	0.083	0.9	0	0.904
TCH2	Hsp70b	631798	609455	3702.AT5G37770.1	3702.AT1G16030.1	0	0	0	0	0	0.081	0.9	0	0.904
TCH2	AT3G09440	631798	620055	3702.AT5G37770.1	3702.AT3G09440.1	0	0	0	0	0	0.081	0.9	0	0.904
TCH2	HSP70	631798	620395	3702.AT5G37770.1	3702.AT3G12580.1	0	0	0	0	0	0.081	0.9	0	0.904
AT5G15550	AT1G79150	630178	614735	3702.AT5G15550.1	3702.AT1G79150.1	0	0	0	0	0	0.904	0	0	0.904
FBA5	AT3G09440	627259	620055	3702.AT4G26530.2	3702.AT3G09440.1	0	0	0	0	0	0.082	0.9	0	0.904
FBA6	Hsp70b	617912	609455	3702.AT2G36460.1	3702.AT1G16030.1	0	0	0	0	0	0.082	0.9	0	0.904
TCH2	Hsp70-2	631798	628884	3702.AT5G37770.1	3702.AT5G02490.1	0	0	0	0	0	0.081	0.9	0	0.904
FBA5	Hsp70b	627259	609455	3702.AT4G26530.2	3702.AT1G16030.1	0	0	0	0	0	0.082	0.9	0	0.904
AT3G11964	NUC-L1	620332	611760	3702.AT3G11964.1	3702.AT1G48920.1	0	0	0	0	0	0.083	0.9	0	0.904
HSP70	FBA6	620395	617912	3702.AT3G12580.1	3702.AT2G36460.1	0	0	0	0	0	0.082	0.9	0	0.904
AT3G09440	FBA6	620055	617912	3702.AT3G09440.1	3702.AT2G36460.1	0	0	0	0	0	0.082	0.9	0	0.904
FBA5	HSP70	627259	620395	3702.AT4G26530.2	3702.AT3G12580.1	0	0	0	0	0	0.082	0.9	0	0.904
Hsp70-2	FBA5	628884	627259	3702.AT5G02490.1	3702.AT4G26530.2	0	0	0	0	0	0.082	0.9	0	0.904
AT2G40360	AT1G29320	618335	610735	3702.AT2G40360.1	3702.AT1G29320.1	0	0	0	0	0	0.903	0	0	0.903
AT4G13170	PAB8	625749	611842	3702.AT4G13170.1	3702.AT1G49760.1	0	0	0	0	0	0.079	0.9	0	0.903
HSP90.1	FBA6	633425	617912	3702.AT5G52640.1	3702.AT2G36460.1	0	0	0	0	0	0.079	0.9	0	0.903
HSP90.1	FBA5	633425	627259	3702.AT5G52640.1	3702.AT4G26530.2	0	0	0	0	0	0.079	0.9	0	0.903
AT3G57490	AT1G51380	623961	612001	3702.AT3G57490.1	3702.AT1G51380.1	0	0	0	0	0	0.071	0.9	0	0.903
HSP81-3	FBA6	633796	617912	3702.AT5G56010.1	3702.AT2G36460.1	0	0	0	0	0	0.079	0.9	0	0.903
HSP81-3	FBA5	633796	627259	3702.AT5G56010.1	3702.AT4G26530.2	0	0	0	0	0	0.079	0.9	0	0.903
NIA1	AT1G16350	614589	609484	3702.AT1G77760.1	3702.AT1G16350.1	0	0	0	0	0	0.064	0.9	0	0.902
HSP90.1	AT1G24140	633425	610285	3702.AT5G52640.1	3702.AT1G24140.1	0	0	0	0	0	0.068	0.9	0	0.902
HSP81-3	AT1G24140	633796	610285	3702.AT5G56010.1	3702.AT1G24140.1	0	0	0	0	0	0.068	0.9	0	0.902
AT3G57000	RRP4	623910	608092	3702.AT3G57000.1	3702.AT1G03360.1	0	0	0	0	0	0.069	0.9	0	0.902
NIA2	AT1G16350	611395	609484	3702.AT1G37130.1	3702.AT1G16350.1	0	0	0	0	0	0.064	0.9	0	0.902
AT1G51380	Hsp70b	612001	609455	3702.AT1G51380.1	3702.AT1G16030.1	0	0	0	0	0	0.057	0.9	0	0.901
Hsp70-2	AT1G51380	628884	612001	3702.AT5G02490.1	3702.AT1G51380.1	0	0	0	0	0	0.057	0.9	0	0.901
ANNAT3	TUB5	618161	609853	3702.AT2G38760.1	3702.AT1G20010.1	0	0	0	0	0	0.051	0.9	0	0.901
AT3G09440	AT1G51380	620055	612001	3702.AT3G09440.1	3702.AT1G51380.1	0	0	0	0	0	0.057	0.9	0	0.901
HSP70	AT1G51380	620395	612001	3702.AT3G12580.1	3702.AT1G51380.1	0	0	0	0	0	0.057	0.9	0	0.901
AT3G13940	NRPA2	620567	610798	3702.AT3G13940.1	3702.AT1G29940.1	0	0	0	0	0	0.901	0	0	0.901
FBA5	FBA6	627259	617912	3702.AT4G26530.2	3702.AT2G36460.1	0	0	0	0.979	0	0	0.9	0	0.9
AT5G08600	AT4G30990	629535	627744	3702.AT5G08600.2	3702.AT4G30990.2	0	0	0	0	0	0	0.9	0	0.9
SAHH2	At3g03780	621659	619478	3702.AT3G23810.1	3702.AT3G03780.1	0	0	0	0	0	0	0.9	0	0.9
HSFA4A	HSFA8	626431	613583	3702.AT4G18880.1	3702.AT1G67970.1	0	0	0	0.779	0	0	0.9	0	0.9
LHCB2.3	LHCB2.2	622087	615303	3702.AT3G27690.1	3702.AT2G05070.1	0	0	0	0.985	0	0	0.9	0	0.9
AT3G57490	AT3G10530	623961	620173	3702.AT3G57490.1	3702.AT3G10530.1	0	0	0	0	0	0	0.9	0	0.9
HSP81-3	LOX3	633796	609594	3702.AT5G56010.1	3702.AT1G17420.1	0	0	0	0	0	0	0.9	0	0.9
CPK28	CPK32	634888	623965	3702.AT5G66210.1	3702.AT3G57530.1	0	0	0	0.888	0	0	0.9	0	0.9
AT5G01720	AT1G55530	628804	612447	3702.AT5G01720.1	3702.AT1G55530.1	0	0	0	0	0	0.046	0.9	0	0.9
TUB5	AT1G16350	609853	609484	3702.AT1G20010.1	3702.AT1G16350.1	0	0	0	0	0	0	0.9	0	0.9
AT3G43670	JAR1	622502	618972	3702.AT3G43670.1	3702.AT2G46370.4	0	0	0	0	0	0	0.9	0	0.9
TCH2	LOX4	631798	614050	3702.AT5G37770.1	3702.AT1G72520.1	0	0	0	0	0	0	0.9	0	0.9
HSFA4A	HSFA7A	626431	623371	3702.AT4G18880.1	3702.AT3G51910.1	0	0	0	0.837	0	0	0.9	0	0.9
JAR1	LOX1	618972	612391	3702.AT2G46370.4	3702.AT1G55020.1	0	0	0	0	0	0	0.9	0	0.9
AT3G09440	LOX1	620055	612391	3702.AT3G09440.1	3702.AT1G55020.1	0	0	0	0	0	0	0.9	0	0.9
NIA2	AT1G13340	611395	609164	3702.AT1G37130.1	3702.AT1G13340.1	0	0	0	0	0	0	0.9	0	0.9
AT4G30990	RRP4	627744	608092	3702.AT4G30990.2	3702.AT1G03360.1	0	0	0	0	0	0	0.9	0	0.9
AT3G09440	JAR1	620055	618972	3702.AT3G09440.1	3702.AT2G46370.4	0	0	0	0	0	0	0.9	0	0.9
RBOHD	NRT1.7	632911	613787	3702.AT5G47910.1	3702.AT1G69870.1	0	0	0	0	0	0	0.9	0	0.9
AT3G57490	AT3G57000	623961	623910	3702.AT3G57490.1	3702.AT3G57000.1	0	0	0	0	0	0	0.9	0	0.9
AT3G09720	AT1G06720	620081	608446	3702.AT3G09720.1	3702.AT1G06720.1	0	0	0	0	0	0.048	0.9	0	0.9
AT3G10530	NUC-L1	620173	611760	3702.AT3G10530.1	3702.AT1G48920.1	0	0	0	0	0	0	0.9	0	0.9
FBA5	LOX1	627259	612391	3702.AT4G26530.2	3702.AT1G55020.1	0	0	0	0	0	0	0.9	0	0.9
NRAMP4	RBOHD	635010	632911	3702.AT5G67330.1	3702.AT5G47910.1	0	0	0	0	0	0	0.9	0	0.9
NOP56	RRP4	612513	608092	3702.AT1G56110.1	3702.AT1G03360.1	0	0	0	0	0	0.046	0.9	0	0.9
AT5G22920	AT1G55530	630891	612447	3702.AT5G22920.1	3702.AT1G55530.1	0	0	0	0	0	0	0.9	0	0.9
HSP70	LOX1	620395	612391	3702.AT3G12580.1	3702.AT1G55020.1	0	0	0	0	0	0	0.9	0	0.9
AT2G40460	AT1G24140	618346	610285	3702.AT2G40460.1	3702.AT1G24140.1	0	0	0	0	0	0	0.9	0	0.9
AT1G63660	AT1G14250	613124	609260	3702.AT1G63660.1	3702.AT1G14250.1	0	0	0	0	0	0	0.9	0	0.9
MTHSC70-2	mtHsc70-1	629597	628494	3702.AT5G09590.1	3702.AT4G37910.1	0	0	0	0.98	0	0	0.9	0	0.9
RBOHD	AT3G54510	632911	623647	3702.AT5G47910.1	3702.AT3G54510.2	0	0	0	0	0	0	0.9	0	0.9
ROC1	FBA6	628579	617912	3702.AT4G38740.1	3702.AT2G36460.1	0	0	0	0	0	0.048	0.9	0	0.9
FBA6	AT1G24140	617912	610285	3702.AT2G36460.1	3702.AT1G24140.1	0	0	0	0	0	0	0.9	0	0.9
HSP90.1	AT1G16350	633425	609484	3702.AT5G52640.1	3702.AT1G16350.1	0	0	0	0	0	0.042	0.9	0	0.9
HSP90.1	PFK3	633425	627229	3702.AT5G52640.1	3702.AT4G26270.1	0	0	0	0	0	0	0.9	0	0.9
AT3G09440	SR45a	620055	608509	3702.AT3G09440.1	3702.AT1G07350.1	0	0	0	0	0	0	0.9	0	0.9
HSFB2A	HSFA2	634433	616809	3702.AT5G62020.1	3702.AT2G26150.1	0	0	0	0.76	0	0	0.9	0	0.9
PHS2	Hsp70b	622844	609455	3702.AT3G46970.1	3702.AT1G16030.1	0	0	0	0	0	0	0.9	0	0.9
NRT1.7	AT1G11960	613787	609018	3702.AT1G69870.1	3702.AT1G11960.1	0	0	0	0	0	0	0.9	0	0.9
AT2G35040	AT1G14250	617758	609260	3702.AT2G35040.1	3702.AT1G14250.1	0	0	0	0	0	0	0.9	0	0.9
BIP2	MTHSC70-2	632249	629597	3702.AT5G42020.1	3702.AT5G09590.1	0	0	0	0.929	0	0	0.9	0	0.9
PFK3	JAR1	627229	618972	3702.AT4G26270.1	3702.AT2G46370.4	0	0	0	0	0	0	0.9	0	0.9
LOX4	Hsp70b	614050	609455	3702.AT1G72520.1	3702.AT1G16030.1	0	0	0	0	0	0	0.9	0	0.9
AT5G01720	AT1G26800	628804	610492	3702.AT5G01720.1	3702.AT1G26800.1	0	0	0	0	0	0.046	0.9	0	0.9
NUC-L1	PWP2	611760	609393	3702.AT1G48920.1	3702.AT1G15440.1	0	0	0	0	0	0	0.9	0	0.9
ALIS1	AT1G11960	620413	609018	3702.AT3G12740.1	3702.AT1G11960.1	0	0	0	0	0	0	0.9	0	0.9
PHS2	UGP1	622844	619417	3702.AT3G46970.1	3702.AT3G03250.1	0	0	0	0	0	0	0.9	0	0.9
CPK28	CPK29	634888	614406	3702.AT5G66210.1	3702.AT1G76040.2	0	0	0	0.907	0	0	0.9	0	0.9
PFK3	AT3G09440	627229	620055	3702.AT4G26270.1	3702.AT3G09440.1	0	0	0	0	0	0.046	0.9	0	0.9
KAT5	AT1G24140	633021	610285	3702.AT5G48880.2	3702.AT1G24140.1	0	0	0	0	0	0	0.9	0	0.9
ROC1	LOX4	628579	614050	3702.AT4G38740.1	3702.AT1G72520.1	0	0	0	0	0	0	0.9	0	0.9
ROC1	AT1G16350	628579	609484	3702.AT4G38740.1	3702.AT1G16350.1	0	0	0	0	0	0	0.9	0	0.9
Hsp70-2	Hsp70b	628884	609455	3702.AT5G02490.1	3702.AT1G16030.1	0	0	0	0.981	0	0	0.9	0	0.9
TUB5	AT1G13340	609853	609164	3702.AT1G20010.1	3702.AT1G13340.1	0	0	0	0	0	0	0.9	0	0.9
Hsp70-2	AT1G16350	628884	609484	3702.AT5G02490.1	3702.AT1G16350.1	0	0	0	0	0	0.048	0.9	0	0.9
HSP70	AT3G09440	620395	620055	3702.AT3G12580.1	3702.AT3G09440.1	0	0	0	0.985	0	0	0.9	0	0.9
HSP70	LOX3	620395	609594	3702.AT3G12580.1	3702.AT1G17420.1	0	0	0	0	0	0	0.9	0	0.9
KAT5	JAR1	633021	618972	3702.AT5G48880.2	3702.AT2G46370.4	0	0	0	0	0	0	0.9	0	0.9
AT1G26800	AT1G14200	610492	609253	3702.AT1G26800.1	3702.AT1G14200.1	0	0	0	0.858	0	0	0.9	0	0.9
AT3G57490	RRP4	623961	608092	3702.AT3G57490.1	3702.AT1G03360.1	0	0	0	0	0	0	0.9	0	0.9
UGT84A2	SNG1	621405	616481	3702.AT3G21560.1	3702.AT2G22990.3	0	0	0	0	0	0	0.9	0	0.9
FBA5	PFK3	627259	627229	3702.AT4G26530.2	3702.AT4G26270.1	0	0	0	0	0	0	0.9	0	0.9
CYCH;1	COP9	631364	625859	3702.AT5G27620.1	3702.AT4G14110.1	0	0	0	0	0	0	0.9	0	0.9
LHCB2.3	LHCB2.1	622087	615304	3702.AT3G27690.1	3702.AT2G05100.1	0	0	0	0.985	0	0	0.9	0	0.9
HSFB2A	HSF4	634433	628396	3702.AT5G62020.1	3702.AT4G36990.1	0	0	0	0.867	0	0	0.9	0	0.9
ANNAT3	NIA1	618161	614589	3702.AT2G38760.1	3702.AT1G77760.1	0	0	0	0	0	0	0.9	0	0.9
AT5G27120	RRP4	631316	608092	3702.AT5G27120.1	3702.AT1G03360.1	0	0	0	0	0	0	0.9	0	0.9
HSP90.1	LOX4	633425	614050	3702.AT5G52640.1	3702.AT1G72520.1	0	0	0	0	0	0	0.9	0	0.9
AT3G10300	TUB5	620146	609853	3702.AT3G10300.3	3702.AT1G20010.1	0	0	0	0	0	0	0.9	0	0.9
AT1G16350	Hsp70b	609484	609455	3702.AT1G16350.1	3702.AT1G16030.1	0	0	0	0	0	0.048	0.9	0	0.9
AT5G22920	AT1G26800	630891	610492	3702.AT5G22920.1	3702.AT1G26800.1	0	0	0	0	0	0	0.9	0	0.9
AT3G10530	RRP4	620173	608092	3702.AT3G10530.1	3702.AT1G03360.1	0	0	0	0	0	0.048	0.9	0	0.9
SMT1	DWF1	629990	621215	3702.AT5G13710.1	3702.AT3G19820.2	0	0	0	0	0	0	0.9	0	0.9
AT4G30990	NUC-L1	627744	611760	3702.AT4G30990.2	3702.AT1G48920.1	0	0	0	0	0	0	0.9	0	0.9
FBA5	LOX3	627259	609594	3702.AT4G26530.2	3702.AT1G17420.1	0	0	0	0	0	0	0.9	0	0.9
AT5G08600	NUC-L1	629535	611760	3702.AT5G08600.2	3702.AT1G48920.1	0	0	0	0	0	0	0.9	0	0.9
AT1G75510	Hsp70b	614358	609455	3702.AT1G75510.1	3702.AT1G16030.1	0	0	0	0	0	0	0.9	0	0.9
AO	AT4G24830	630099	627072	3702.AT5G14760.1	3702.AT4G24830.1	0	0	0	0	0	0	0.9	0	0.9
CYCH;1	AT1G75510	631364	614358	3702.AT5G27620.1	3702.AT1G75510.1	0	0	0	0	0	0	0.9	0	0.9
NIA1	AT1G13340	614589	609164	3702.AT1G77760.1	3702.AT1G13340.1	0	0	0	0	0	0	0.9	0	0.9
AT1G63810	RRP4	613137	608092	3702.AT1G63810.1	3702.AT1G03360.1	0	0	0	0	0	0	0.9	0	0.9
HSP81-3	PHS2	633796	622844	3702.AT5G56010.1	3702.AT3G46970.1	0	0	0	0	0	0	0.9	0	0.9
AT4G04940	RRP4	625105	608092	3702.AT4G04940.1	3702.AT1G03360.1	0	0	0	0	0	0	0.9	0	0.9
Hsp70-2	LOX4	628884	614050	3702.AT5G02490.1	3702.AT1G72520.1	0	0	0	0	0	0	0.9	0	0.9
AT3G21540	RRP4	621403	608092	3702.AT3G21540.1	3702.AT1G03360.1	0	0	0	0	0	0.048	0.9	0	0.9
TCH2	AT1G24140	631798	610285	3702.AT5G37770.1	3702.AT1G24140.1	0	0	0	0	0	0	0.9	0	0.9
HSP90.1	JAR1	633425	618972	3702.AT5G52640.1	3702.AT2G46370.4	0	0	0	0	0	0	0.9	0	0.9
PFK3	Hsp70b	627229	609455	3702.AT4G26270.1	3702.AT1G16030.1	0	0	0	0	0	0.046	0.9	0	0.9
AT4G28450	SPA4	627468	612185	3702.AT4G28450.1	3702.AT1G53090.2	0	0	0	0	0	0	0.9	0	0.9
AT1G24140	LOX3	610285	609594	3702.AT1G24140.1	3702.AT1G17420.1	0	0	0	0	0	0	0.9	0	0.9
CPR	AT1G16350	623360	609484	3702.AT3G51800.2	3702.AT1G16350.1	0	0	0	0	0	0	0.9	0	0.9
RDUF1	AT1G26800	622806	610492	3702.AT3G46620.1	3702.AT1G26800.1	0	0	0	0.75	0	0	0.9	0	0.9
RDUF2	AT5G01720	634177	628804	3702.AT5G59550.1	3702.AT5G01720.1	0	0	0	0	0	0.046	0.9	0	0.9
PFK3	HSP70	627229	620395	3702.AT4G26270.1	3702.AT3G12580.1	0	0	0	0	0	0.046	0.9	0	0.9
AT5G01720	AT1G14200	628804	609253	3702.AT5G01720.1	3702.AT1G14200.1	0	0	0	0	0	0.046	0.9	0	0.9
TOZ	NUC-L1	630307	611760	3702.AT5G16750.1	3702.AT1G48920.1	0	0	0	0	0	0	0.9	0	0.9
RBOHD	AT1G11960	632911	609018	3702.AT5G47910.1	3702.AT1G11960.1	0	0	0	0	0	0	0.9	0	0.9
RDUF1	AT1G55530	622806	612447	3702.AT3G46620.1	3702.AT1G55530.1	0	0	0	0.71	0	0	0.9	0	0.9
CPR	AT1G13340	623360	609164	3702.AT3G51800.2	3702.AT1G13340.1	0	0	0	0	0	0	0.9	0	0.9
CPR	AT3G10300	623360	620146	3702.AT3G51800.2	3702.AT3G10300.3	0	0	0	0	0	0	0.9	0	0.9
PHS2	AT3G10300	622844	620146	3702.AT3G46970.1	3702.AT3G10300.3	0	0	0	0	0	0	0.9	0	0.9
HSP70	SR45a	620395	608509	3702.AT3G12580.1	3702.AT1G07350.1	0	0	0	0	0	0	0.9	0	0.9
RDUF2	AT5G22920	634177	630891	3702.AT5G59550.1	3702.AT5G22920.1	0	0	0	0	0	0	0.9	0	0.9
AT1G24140	AT1G11960	610285	609018	3702.AT1G24140.1	3702.AT1G11960.1	0	0	0	0	0	0	0.9	0	0.9
JAR1	LOX4	618972	614050	3702.AT2G46370.4	3702.AT1G72520.1	0	0	0	0	0	0	0.9	0	0.9
NRAMP4	AT1G11960	635010	609018	3702.AT5G67330.1	3702.AT1G11960.1	0	0	0	0	0	0	0.9	0	0.9
CYP83B1	CYP71A13	627801	617288	3702.AT4G31500.1	3702.AT2G30770.1	0	0	0	0.88	0	0	0.9	0	0.9
PFK3	AT1G24140	627229	610285	3702.AT4G26270.1	3702.AT1G24140.1	0	0	0	0	0	0	0.9	0	0.9
ROC1	FBA5	628579	627259	3702.AT4G38740.1	3702.AT4G26530.2	0	0	0	0	0	0.048	0.9	0	0.9
TOZ	AT3G09720	630307	620081	3702.AT5G16750.1	3702.AT3G09720.1	0	0	0	0	0	0	0.9	0	0.9
AT1G66500	Hsp70b	613426	609455	3702.AT1G66500.1	3702.AT1G16030.1	0	0	0	0	0	0	0.9	0	0.9
HSP70	LOX4	620395	614050	3702.AT3G12580.1	3702.AT1G72520.1	0	0	0	0	0	0	0.9	0	0.9
AT3G57490	PWP2	623961	609393	3702.AT3G57490.1	3702.AT1G15440.1	0	0	0	0	0	0	0.9	0	0.9
PHS2	JAR1	622844	618972	3702.AT3G46970.1	3702.AT2G46370.4	0	0	0	0	0	0	0.9	0	0.9
CPR	NIA1	623360	614589	3702.AT3G51800.2	3702.AT1G77760.1	0	0	0	0	0	0	0.9	0	0.9
AT3G09440	AT1G66500	620055	613426	3702.AT3G09440.1	3702.AT1G66500.1	0	0	0	0	0	0	0.9	0	0.9
LOX1	Hsp70b	612391	609455	3702.AT1G55020.1	3702.AT1G16030.1	0	0	0	0	0	0	0.9	0	0.9
HSF4	AT-HSFB2B	628396	625592	3702.AT4G36990.1	3702.AT4G11660.1	0	0	0	0.858	0	0	0.9	0	0.9
UGT84A2	4CL3	621405	613271	3702.AT3G21560.1	3702.AT1G65060.1	0	0	0	0	0	0	0.9	0	0.9
AT4G28450	SPA1	627468	618970	3702.AT4G28450.1	3702.AT2G46340.1	0	0	0	0	0	0	0.9	0	0.9
RBOHD	AT1G52190	632911	612087	3702.AT5G47910.1	3702.AT1G52190.1	0	0	0	0	0	0	0.9	0	0.9
HCT	CYP98A3	633027	618393	3702.AT5G48930.1	3702.AT2G40890.1	0	0	0	0	0	0	0.9	0	0.9
LHCB2.1	LHCB2.2	615304	615303	3702.AT2G05100.1	3702.AT2G05070.1	0	0	0	0.986	0	0	0.9	0	0.9
AT5G27120	AT3G05060	631316	619621	3702.AT5G27120.1	3702.AT3G05060.1	0	0	0	0.981	0	0	0.9	0	0.9
TT7	CHIL	629464	629179	3702.AT5G07990.1	3702.AT5G05270.1	0	0	0	0	0	0	0.9	0	0.9
AT2G18900	RRP4	616045	608092	3702.AT2G18900.1	3702.AT1G03360.1	0	0	0	0	0	0	0.9	0	0.9
NUC-L1	AT1G06720	611760	608446	3702.AT1G48920.1	3702.AT1G06720.1	0	0	0	0	0	0	0.9	0	0.9
BIP2	mtHsc70-1	632249	628494	3702.AT5G42020.1	3702.AT4G37910.1	0	0	0	0.928	0	0	0.9	0	0.9
HSF4	HSFA4A	628396	626431	3702.AT4G36990.1	3702.AT4G18880.1	0	0	0	0.796	0	0	0.9	0	0.9
AT3G54510	ALIS1	623647	620413	3702.AT3G54510.2	3702.AT3G12740.1	0	0	0	0	0	0	0.9	0	0.9
At3g03780	MGL	619478	613231	3702.AT3G03780.1	3702.AT1G64660.1	0	0	0	0	0	0	0.9	0	0.9
Hsp70-2	AT1G24140	628884	610285	3702.AT5G02490.1	3702.AT1G24140.1	0	0	0	0	0	0	0.9	0	0.9
PFK3	FBA6	627229	617912	3702.AT4G26270.1	3702.AT2G36460.1	0	0	0	0	0	0	0.9	0	0.9
FBA5	JAR1	627259	618972	3702.AT4G26530.2	3702.AT2G46370.4	0	0	0	0	0	0	0.9	0	0.9
HSP81-3	JAR1	633796	618972	3702.AT5G56010.1	3702.AT2G46370.4	0	0	0	0	0	0	0.9	0	0.9
AT3G54510	AT1G24140	623647	610285	3702.AT3G54510.2	3702.AT1G24140.1	0	0	0	0	0	0	0.9	0	0.9
HSP90.1	PHS2	633425	622844	3702.AT5G52640.1	3702.AT3G46970.1	0	0	0	0	0	0	0.9	0	0.9
AT1G55530	AT1G26800	612447	610492	3702.AT1G55530.1	3702.AT1G26800.1	0	0	0	0.738	0	0	0.9	0	0.9
TOZ	AT3G57490	630307	623961	3702.AT5G16750.1	3702.AT3G57490.1	0	0	0	0	0	0	0.9	0	0.9
AT2G40460	AT1G52190	618346	612087	3702.AT2G40460.1	3702.AT1G52190.1	0	0	0	0.827	0	0	0.9	0	0.9
PHS2	AT1G24140	622844	610285	3702.AT3G46970.1	3702.AT1G24140.1	0	0	0	0	0	0	0.9	0	0.9
NRAMP4	AT3G54510	635010	623647	3702.AT5G67330.1	3702.AT3G54510.2	0	0	0	0	0	0	0.9	0	0.9
HSP70	AT1G16350	620395	609484	3702.AT3G12580.1	3702.AT1G16350.1	0	0	0	0	0	0.048	0.9	0	0.9
AT3G10300	NIA1	620146	614589	3702.AT3G10300.3	3702.AT1G77760.1	0	0	0	0	0	0.048	0.9	0	0.9
XLG2	GPA1	628119	616824	3702.AT4G34390.1	3702.AT2G26300.1	0	0	0	0.694	0	0	0.9	0	0.9
LOX1	LOX3	612391	609594	3702.AT1G55020.1	3702.AT1G17420.1	0	0	0	0.918	0	0	0.9	0	0.9
AT5G57655	AT1G06030	633974	608374	3702.AT5G57655.2	3702.AT1G06030.1	0	0	0	0	0	0	0.9	0	0.9
FBA6	AT1G16350	617912	609484	3702.AT2G36460.1	3702.AT1G16350.1	0	0	0	0	0	0	0.9	0	0.9
LHCB2.2	NPQ4	615303	611511	3702.AT2G05070.1	3702.AT1G44575.1	0	0	0	0	0	0	0.9	0	0.9
JAR1	AT1G16350	618972	609484	3702.AT2G46370.4	3702.AT1G16350.1	0	0	0	0	0	0	0.9	0	0.9
HSP81-3	LOX4	633796	614050	3702.AT5G56010.1	3702.AT1G72520.1	0	0	0	0	0	0	0.9	0	0.9
TT7	TT5	629464	623713	3702.AT5G07990.1	3702.AT3G55120.1	0	0	0	0	0	0	0.9	0	0.9
HSFA2	HSFA8	616809	613583	3702.AT2G26150.1	3702.AT1G67970.1	0	0	0	0.818	0	0	0.9	0	0.9
AT3G57490	NUC-L1	623961	611760	3702.AT3G57490.1	3702.AT1G48920.1	0	0	0	0	0	0	0.9	0	0.9
CPR	NIA2	623360	611395	3702.AT3G51800.2	3702.AT1G37130.1	0	0	0	0	0	0	0.9	0	0.9
LHCB2.1	NPQ4	615304	611511	3702.AT2G05100.1	3702.AT1G44575.1	0	0	0	0	0	0	0.9	0	0.9
PHS2	LOX3	622844	609594	3702.AT3G46970.1	3702.AT1G17420.1	0	0	0	0	0	0	0.9	0	0.9
RBOHD	ALIS1	632911	620413	3702.AT5G47910.1	3702.AT3G12740.1	0	0	0	0	0	0	0.9	0	0.9
AT1G24140	Hsp70b	610285	609455	3702.AT1G24140.1	3702.AT1G16030.1	0	0	0	0	0	0	0.9	0	0.9
AT3G09720	NUC-L1	620081	611760	3702.AT3G09720.1	3702.AT1G48920.1	0	0	0	0	0	0	0.9	0	0.9
LOX1	AT1G16350	612391	609484	3702.AT1G55020.1	3702.AT1G16350.1	0	0	0	0	0	0	0.9	0	0.9
HSP70	JAR1	620395	618972	3702.AT3G12580.1	3702.AT2G46370.4	0	0	0	0	0	0	0.9	0	0.9
LOX3	Hsp70b	609594	609455	3702.AT1G17420.1	3702.AT1G16030.1	0	0	0	0	0	0	0.9	0	0.9
AT3G09440	AT1G24140	620055	610285	3702.AT3G09440.1	3702.AT1G24140.1	0	0	0	0	0	0	0.9	0	0.9
JAR1	LOX3	618972	609594	3702.AT2G46370.4	3702.AT1G17420.1	0	0	0	0	0	0	0.9	0	0.9
HSFA7A	HSFA2	623371	616809	3702.AT3G51910.1	3702.AT2G26150.1	0	0	0	0.916	0	0	0.9	0	0.9
AT5G01720	RDUF1	628804	622806	3702.AT5G01720.1	3702.AT3G46620.1	0	0	0	0	0	0.046	0.9	0	0.9
FBA5	AT1G16350	627259	609484	3702.AT4G26530.2	3702.AT1G16350.1	0	0	0	0	0	0	0.9	0	0.9
AT3G09440	AT1G16350	620055	609484	3702.AT3G09440.1	3702.AT1G16350.1	0	0	0	0	0	0.048	0.9	0	0.9
RDUF1	AT1G14200	622806	609253	3702.AT3G46620.1	3702.AT1G14200.1	0	0	0	0.778	0	0	0.9	0	0.9
JAR1	FBA6	618972	617912	3702.AT2G46370.4	3702.AT2G36460.1	0	0	0	0	0	0	0.9	0	0.9
HSFB2A	HSFA4A	634433	626431	3702.AT5G62020.1	3702.AT4G18880.1	0	0	0	0.781	0	0	0.9	0	0.9
LOX3	AT1G16350	609594	609484	3702.AT1G17420.1	3702.AT1G16350.1	0	0	0	0	0	0	0.9	0	0.9
FBA5	AT1G24140	627259	610285	3702.AT4G26530.2	3702.AT1G24140.1	0	0	0	0	0	0	0.9	0	0.9
LOX4	AT1G16350	614050	609484	3702.AT1G72520.1	3702.AT1G16350.1	0	0	0	0	0	0	0.9	0	0.9
PHS2	HSP70	622844	620395	3702.AT3G46970.1	3702.AT3G12580.1	0	0	0	0	0	0	0.9	0	0.9
HSP81-3	LOX1	633796	612391	3702.AT5G56010.1	3702.AT1G55020.1	0	0	0	0	0	0	0.9	0	0.9
AT4G28450	NUC-L1	627468	611760	3702.AT4G28450.1	3702.AT1G48920.1	0	0	0	0	0	0	0.9	0	0.9
BIP2	PFT1	632249	610405	3702.AT5G42020.1	3702.AT1G25540.1	0	0	0	0	0	0	0.9	0	0.9
PHS2	ANNAT3	622844	618161	3702.AT3G46970.1	3702.AT2G38760.1	0	0	0	0	0	0	0.9	0	0.9
CPR	TUB5	623360	609853	3702.AT3G51800.2	3702.AT1G20010.1	0	0	0	0	0	0	0.9	0	0.9
PFK3	LOX3	627229	609594	3702.AT4G26270.1	3702.AT1G17420.1	0	0	0	0	0	0	0.9	0	0.9
AT4G04940	NUC-L1	625105	611760	3702.AT4G04940.1	3702.AT1G48920.1	0	0	0	0	0	0	0.9	0	0.9
HSFB2A	AT-HSFB2B	634433	625592	3702.AT5G62020.1	3702.AT4G11660.1	0	0	0	0.915	0	0	0.9	0	0.9
HSF4	HSFA7A	628396	623371	3702.AT4G36990.1	3702.AT3G51910.1	0	0	0	0.785	0	0	0.9	0	0.9
AT5G15750	AT3G09720	630199	620081	3702.AT5G15750.1	3702.AT3G09720.1	0	0	0	0	0	0	0.9	0	0.9
ALIS1	AT2G40460	620413	618346	3702.AT3G12740.1	3702.AT2G40460.1	0	0	0	0	0	0	0.9	0	0.9
ROC1	JAR1	628579	618972	3702.AT4G38740.1	3702.AT2G46370.4	0	0	0	0	0	0	0.9	0	0.9
AT3G09440	LOX3	620055	609594	3702.AT3G09440.1	3702.AT1G17420.1	0	0	0	0	0	0	0.9	0	0.9
AT4G30990	AT3G09720	627744	620081	3702.AT4G30990.2	3702.AT3G09720.1	0	0	0	0	0	0	0.9	0	0.9
Hsp70-2	JAR1	628884	618972	3702.AT5G02490.1	3702.AT2G46370.4	0	0	0	0	0	0	0.9	0	0.9
AT3G06530	NUC-L1	619794	611760	3702.AT3G06530.2	3702.AT1G48920.1	0	0	0	0	0	0	0.9	0	0.9
AT3G05060	RRP4	619621	608092	3702.AT3G05060.1	3702.AT1G03360.1	0	0	0	0	0	0	0.9	0	0.9
AT5G22920	RDUF1	630891	622806	3702.AT5G22920.1	3702.AT3G46620.1	0	0	0	0	0	0	0.9	0	0.9
FBA6	LOX4	617912	614050	3702.AT2G36460.1	3702.AT1G72520.1	0	0	0	0	0	0	0.9	0	0.9
HSP90.1	LOX3	633425	609594	3702.AT5G52640.1	3702.AT1G17420.1	0	0	0	0	0	0	0.9	0	0.9
HSP81-3	PFK3	633796	627229	3702.AT5G56010.1	3702.AT4G26270.1	0	0	0	0	0	0	0.9	0	0.9
AT5G66540	RRP4	634922	608092	3702.AT5G66540.1	3702.AT1G03360.1	0	0	0	0	0	0	0.9	0	0.9
AT3G57490	AT1G06720	623961	608446	3702.AT3G57490.1	3702.AT1G06720.1	0	0	0	0	0	0	0.9	0	0.9
AO	ASN1	630099	622874	3702.AT5G14760.1	3702.AT3G47340.1	0	0	0	0	0	0	0.9	0	0.9
AT2G40460	NRT1.7	618346	613787	3702.AT2G40460.1	3702.AT1G69870.1	0	0	0	0.854	0	0	0.9	0	0.9
LOX4	LOX3	614050	609594	3702.AT1G72520.1	3702.AT1G17420.1	0	0	0	0.983	0	0	0.9	0	0.9
JAR1	Hsp70b	618972	609455	3702.AT2G46370.4	3702.AT1G16030.1	0	0	0	0	0	0	0.9	0	0.9
AT3G06530	RRP4	619794	608092	3702.AT3G06530.2	3702.AT1G03360.1	0	0	0	0	0	0	0.9	0	0.9
FBA5	LOX4	627259	614050	3702.AT4G26530.2	3702.AT1G72520.1	0	0	0	0	0	0	0.9	0	0.9
TT7	UGT78D1	629464	610860	3702.AT5G07990.1	3702.AT1G30530.1	0	0	0	0	0	0.044	0.9	0	0.9
HSFB2A	HSFA7A	634433	623371	3702.AT5G62020.1	3702.AT3G51910.1	0	0	0	0.781	0	0	0.9	0	0.9
PWP2	RRP4	609393	608092	3702.AT1G15440.1	3702.AT1G03360.1	0	0	0	0	0	0	0.9	0	0.9
HSP70	AT1G66500	620395	613426	3702.AT3G12580.1	3702.AT1G66500.1	0	0	0	0	0	0	0.9	0	0.9
AT3G09720	AT2G18900	620081	616045	3702.AT3G09720.1	3702.AT2G18900.1	0	0	0	0	0	0	0.9	0	0.9
NRT1.7	AT1G52190	613787	612087	3702.AT1G69870.1	3702.AT1G52190.1	0	0	0	0.877	0	0	0.9	0	0.9
HCT	4CL3	633027	613271	3702.AT5G48930.1	3702.AT1G65060.1	0	0	0	0	0	0	0.9	0	0.9
AT1G24140	AT1G16350	610285	609484	3702.AT1G24140.1	3702.AT1G16350.1	0	0	0	0	0	0	0.9	0	0.9
NIA2	TUB5	611395	609853	3702.AT1G37130.1	3702.AT1G20010.1	0	0	0	0	0	0.048	0.9	0	0.9
AT3G57490	AT3G06530	623961	619794	3702.AT3G57490.1	3702.AT3G06530.2	0	0	0	0	0	0	0.9	0	0.9
AT-HSFB2B	HSFA2	625592	616809	3702.AT4G11660.1	3702.AT2G26150.1	0	0	0	0.738	0	0	0.9	0	0.9
TT7	LDOX	629464	626863	3702.AT5G07990.1	3702.AT4G22880.1	0	0	0	0	0	0	0.9	0	0.9
JAR1	AT1G24140	618972	610285	3702.AT2G46370.4	3702.AT1G24140.1	0	0	0	0	0	0	0.9	0	0.9
AT5G22100	AT3G09720	630804	620081	3702.AT5G22100.1	3702.AT3G09720.1	0	0	0	0	0	0	0.9	0	0.9
TCH2	FBA5	631798	627259	3702.AT5G37770.1	3702.AT4G26530.2	0	0	0	0	0	0.043	0.9	0	0.9
OMT1	4CL1	633595	612034	3702.AT5G54160.1	3702.AT1G51680.1	0	0	0	0	0	0	0.9	0	0.9
AT1G74320	AT1G73600	614240	614159	3702.AT1G74320.1	3702.AT1G73600.2	0	0	0	0	0	0	0.9	0	0.9
HSFA4A	HSFA2	626431	616809	3702.AT4G18880.1	3702.AT2G26150.1	0	0	0	0.808	0	0	0.9	0	0.9
Hsp70-2	HSP70	628884	620395	3702.AT5G02490.1	3702.AT3G12580.1	0	0	0	0.985	0	0	0.9	0	0.9
AT3G57490	PAB8	623961	611842	3702.AT3G57490.1	3702.AT1G49760.1	0	0	0	0	0	0.049	0.9	0	0.9
AT3G11964	RRP4	620332	608092	3702.AT3G11964.1	3702.AT1G03360.1	0	0	0	0	0	0.048	0.9	0	0.9
HSP81-3	AT1G16350	633796	609484	3702.AT5G56010.1	3702.AT1G16350.1	0	0	0	0	0	0.042	0.9	0	0.9
Hsp70-2	AT1G75510	628884	614358	3702.AT5G02490.1	3702.AT1G75510.1	0	0	0	0	0	0	0.9	0	0.9
TT4	CHIL	630014	629179	3702.AT5G13930.1	3702.AT5G05270.1	0	0	0	0	0	0	0.9	0	0.9
AT1G75510	SR45a	614358	608509	3702.AT1G75510.1	3702.AT1G07350.1	0	0	0	0	0	0	0.9	0	0.9
AT3G09440	AT1G75510	620055	614358	3702.AT3G09440.1	3702.AT1G75510.1	0	0	0	0	0	0	0.9	0	0.9
ANNAT3	AT1G13340	618161	609164	3702.AT2G38760.1	3702.AT1G13340.1	0	0	0	0	0	0	0.9	0	0.9
ALIS1	NRT1.7	620413	613787	3702.AT3G12740.1	3702.AT1G69870.1	0	0	0	0	0	0	0.9	0	0.9
HSFA7A	HSFA8	623371	613583	3702.AT3G51910.1	3702.AT1G67970.1	0	0	0	0.86	0	0	0.9	0	0.9
Hsp70-2	PFK3	628884	627229	3702.AT5G02490.1	3702.AT4G26270.1	0	0	0	0	0	0.046	0.9	0	0.9
ROC1	SR45a	628579	608509	3702.AT4G38740.1	3702.AT1G07350.1	0	0	0	0	0	0	0.9	0	0.9
AT1G55530	AT1G14200	612447	609253	3702.AT1G55530.1	3702.AT1G14200.1	0	0	0	0.758	0	0	0.9	0	0.9
HSFA4A	AT-HSFB2B	626431	625592	3702.AT4G18880.1	3702.AT4G11660.1	0	0	0	0.728	0	0	0.9	0	0.9
TCH2	LOX3	631798	609594	3702.AT5G37770.1	3702.AT1G17420.1	0	0	0	0	0	0	0.9	0	0.9
Hsp70-2	LOX1	628884	612391	3702.AT5G02490.1	3702.AT1G55020.1	0	0	0	0	0	0	0.9	0	0.9
AT1G52190	AT1G11960	612087	609018	3702.AT1G52190.1	3702.AT1G11960.1	0	0	0	0	0	0	0.9	0	0.9
AT1G75510	AT1G66500	614358	613426	3702.AT1G75510.1	3702.AT1G66500.1	0	0	0	0	0	0	0.9	0	0.9
HSF4	HSFA2	628396	616809	3702.AT4G36990.1	3702.AT2G26150.1	0	0	0	0.784	0	0	0.9	0	0.9
ANNAT3	NIA2	618161	611395	3702.AT2G38760.1	3702.AT1G37130.1	0	0	0	0	0	0	0.9	0	0.9
PFK3	AT1G16350	627229	609484	3702.AT4G26270.1	3702.AT1G16350.1	0	0	0	0	0	0	0.9	0	0.9
AT5G15750	AT4G30990	630199	627744	3702.AT5G15750.1	3702.AT4G30990.2	0	0	0	0	0	0	0.9	0	0.9
TCH2	LOX1	631798	612391	3702.AT5G37770.1	3702.AT1G55020.1	0	0	0	0	0	0	0.9	0	0.9
PHS2	TUB5	622844	609853	3702.AT3G46970.1	3702.AT1G20010.1	0	0	0	0	0	0	0.9	0	0.9
AT5G14520	AT1G25260	630075	610373	3702.AT5G14520.1	3702.AT1G25260.1	0	0	0	0	0	0.9	0	0	0.9
AT5G66540	NUC-L1	634922	611760	3702.AT5G66540.1	3702.AT1G48920.1	0	0	0	0	0	0	0.9	0	0.9
AT1G52190	AT1G24140	612087	610285	3702.AT1G52190.1	3702.AT1G24140.1	0	0	0	0	0	0	0.9	0	0.9
AT5G22920	AT1G14200	630891	609253	3702.AT5G22920.1	3702.AT1G14200.1	0	0	0	0	0	0	0.9	0	0.9
UGP1	RHM1	619417	614671	3702.AT3G03250.1	3702.AT1G78570.1	0	0	0	0	0	0	0.9	0	0.9
AT3G43670	AT1G24140	622502	610285	3702.AT3G43670.1	3702.AT1G24140.1	0	0	0	0	0	0	0.9	0	0.9
AT3G09440	Hsp70b	620055	609455	3702.AT3G09440.1	3702.AT1G16030.1	0	0	0	0.982	0	0	0.9	0	0.9
FBA6	LOX1	617912	612391	3702.AT2G36460.1	3702.AT1G55020.1	0	0	0	0	0	0	0.9	0	0.9
AT3G09440	LOX4	620055	614050	3702.AT3G09440.1	3702.AT1G72520.1	0	0	0	0	0	0	0.9	0	0.9
AT5G22100	NUC-L1	630804	611760	3702.AT5G22100.1	3702.AT1G48920.1	0	0	0	0	0	0	0.9	0	0.9
CPK32	CPK29	623965	614406	3702.AT3G57530.1	3702.AT1G76040.2	0	0	0	0.929	0	0	0.9	0	0.9
AT4G04940	AT3G09720	625105	620081	3702.AT4G04940.1	3702.AT3G09720.1	0	0	0	0	0	0	0.9	0	0.9
ROC1	AT1G24140	628579	610285	3702.AT4G38740.1	3702.AT1G24140.1	0	0	0	0	0	0	0.9	0	0.9
TOZ	RRP4	630307	608092	3702.AT5G16750.1	3702.AT1G03360.1	0	0	0	0	0	0.048	0.9	0	0.9
LHCB2.3	NPQ4	622087	611511	3702.AT3G27690.1	3702.AT1G44575.1	0	0	0	0	0	0	0.9	0	0.9
AT3G54510	NRT1.7	623647	613787	3702.AT3G54510.2	3702.AT1G69870.1	0	0	0	0	0	0	0.9	0	0.9
PHS2	NIA2	622844	611395	3702.AT3G46970.1	3702.AT1G37130.1	0	0	0	0	0	0	0.9	0	0.9
AT3G10300	NIA2	620146	611395	3702.AT3G10300.3	3702.AT1G37130.1	0	0	0	0	0	0.048	0.9	0	0.9
ANNAT3	AT1G16350	618161	609484	3702.AT2G38760.1	3702.AT1G16350.1	0	0	0	0	0	0	0.9	0	0.9
UGT84A2	4CL1	621405	612034	3702.AT3G21560.1	3702.AT1G51680.1	0	0	0	0	0	0	0.9	0	0.9
AT-HSFB2B	HSFA7A	625592	623371	3702.AT4G11660.1	3702.AT3G51910.1	0	0	0	0.784	0	0	0.9	0	0.9
AT-HSFB2B	HSFA8	625592	613583	3702.AT4G11660.1	3702.AT1G67970.1	0	0	0	0.705	0	0	0.9	0	0.9
AT3G10300	AT1G16350	620146	609484	3702.AT3G10300.3	3702.AT1G16350.1	0	0	0	0	0	0	0.9	0	0.9
AT2G35040	AT1G16350	617758	609484	3702.AT2G35040.1	3702.AT1G16350.1	0	0	0	0	0	0	0.9	0	0.9
AT5G22920	AT5G01720	630891	628804	3702.AT5G22920.1	3702.AT5G01720.1	0	0	0	0	0	0	0.9	0	0.9
AT3G57000	AT3G09720	623910	620081	3702.AT3G57000.1	3702.AT3G09720.1	0	0	0	0	0	0	0.9	0	0.9
AT5G08600	RRP4	629535	608092	3702.AT5G08600.2	3702.AT1G03360.1	0	0	0	0	0	0	0.9	0	0.9
AT4G30990	AT3G57000	627744	623910	3702.AT4G30990.2	3702.AT3G57000.1	0	0	0	0	0	0	0.9	0	0.9
PHS2	AT1G13340	622844	609164	3702.AT3G46970.1	3702.AT1G13340.1	0	0	0	0	0	0	0.9	0	0.9
NIA1	TUB5	614589	609853	3702.AT1G77760.1	3702.AT1G20010.1	0	0	0	0	0	0.048	0.9	0	0.9
AT1G51380	SR45a	612001	608509	3702.AT1G51380.1	3702.AT1G07350.1	0	0	0	0	0	0	0.9	0	0.9
ROC1	AT1G66500	628579	613426	3702.AT4G38740.1	3702.AT1G66500.1	0	0	0	0	0	0	0.9	0	0.9
HSP70	AT1G24140	620395	610285	3702.AT3G12580.1	3702.AT1G24140.1	0	0	0	0	0	0	0.9	0	0.9
CYCH;1	ROC1	631364	628579	3702.AT5G27620.1	3702.AT4G38740.1	0	0	0	0	0	0	0.9	0	0.9
FBA6	LOX3	617912	609594	3702.AT2G36460.1	3702.AT1G17420.1	0	0	0	0	0	0	0.9	0	0.9
PHS2	FBA6	622844	617912	3702.AT3G46970.1	3702.AT2G36460.1	0	0	0	0	0	0.049	0.9	0	0.9
AT3G57000	NUC-L1	623910	611760	3702.AT3G57000.1	3702.AT1G48920.1	0	0	0	0	0	0	0.9	0	0.9
RBOHD	AT1G24140	632911	610285	3702.AT5G47910.1	3702.AT1G24140.1	0	0	0	0	0	0	0.9	0	0.9
AT3G10530	AT3G09720	620173	620081	3702.AT3G10530.1	3702.AT3G09720.1	0	0	0	0	0	0	0.9	0	0.9
AT2G40460	AT1G11960	618346	609018	3702.AT2G40460.1	3702.AT1G11960.1	0	0	0	0	0	0	0.9	0	0.9
Hsp70-2	PHS2	628884	622844	3702.AT5G02490.1	3702.AT3G46970.1	0	0	0	0	0	0	0.9	0	0.9
AT1G75510	AT1G51380	614358	612001	3702.AT1G75510.1	3702.AT1G51380.1	0	0	0	0	0	0	0.9	0	0.9
AT5G22100	RRP4	630804	608092	3702.AT5G22100.1	3702.AT1G03360.1	0	0	0	0	0	0	0.9	0	0.9
AT1G16350	AT1G13340	609484	609164	3702.AT1G16350.1	3702.AT1G13340.1	0	0	0	0	0	0.048	0.9	0	0.9
RDUF2	AT1G55530	634177	612447	3702.AT5G59550.1	3702.AT1G55530.1	0	0	0	0.676	0	0	0.9	0	0.9
DEL2	DEL1	630116	622959	3702.AT5G14960.1	3702.AT3G48160.2	0	0	0	0.886	0	0	0.9	0	0.9
AT3G54510	AT2G40460	623647	618346	3702.AT3G54510.2	3702.AT2G40460.1	0	0	0	0	0	0	0.9	0	0.9
HSP70	AT1G75510	620395	614358	3702.AT3G12580.1	3702.AT1G75510.1	0	0	0	0	0	0	0.9	0	0.9
PHS2	AT1G16350	622844	609484	3702.AT3G46970.1	3702.AT1G16350.1	0	0	0	0	0	0	0.9	0	0.9
HCT	4CL1	633027	612034	3702.AT5G48930.1	3702.AT1G51680.1	0	0	0	0	0	0	0.9	0	0.9
AT3G57490	AT3G09720	623961	620081	3702.AT3G57490.1	3702.AT3G09720.1	0	0	0	0	0	0	0.9	0	0.9
AT3G54510	AT1G52190	623647	612087	3702.AT3G54510.2	3702.AT1G52190.1	0	0	0	0	0	0	0.9	0	0.9
RDUF2	AT1G14200	634177	609253	3702.AT5G59550.1	3702.AT1G14200.1	0	0	0	0.756	0	0	0.9	0	0.9
LOX4	LOX1	614050	612391	3702.AT1G72520.1	3702.AT1G55020.1	0	0	0	0.922	0	0	0.9	0	0.9
OMT1	UGT84A2	633595	621405	3702.AT5G54160.1	3702.AT3G21560.1	0	0	0	0	0	0	0.9	0	0.9
PHS2	LOX4	622844	614050	3702.AT3G46970.1	3702.AT1G72520.1	0	0	0	0	0	0	0.9	0	0.9
PHS2	LOX1	622844	612391	3702.AT3G46970.1	3702.AT1G55020.1	0	0	0	0	0	0	0.9	0	0.9
AT4G04940	AT3G57490	625105	623961	3702.AT4G04940.1	3702.AT3G57490.1	0	0	0	0	0	0	0.9	0	0.9
CPR	ANNAT3	623360	618161	3702.AT3G51800.2	3702.AT2G38760.1	0	0	0	0	0	0	0.9	0	0.9
ASN2	AO	634754	630099	3702.AT5G65010.2	3702.AT5G14760.1	0	0	0	0	0	0	0.9	0	0.9
AT5G08600	AT3G57490	629535	623961	3702.AT5G08600.2	3702.AT3G57490.1	0	0	0	0	0	0	0.9	0	0.9
ALIS1	AT1G24140	620413	610285	3702.AT3G12740.1	3702.AT1G24140.1	0	0	0	0	0	0	0.9	0	0.9
OMT1	4CL3	633595	613271	3702.AT5G54160.1	3702.AT1G65060.1	0	0	0	0	0	0	0.9	0	0.9
PHS2	AT3G09440	622844	620055	3702.AT3G46970.1	3702.AT3G09440.1	0	0	0	0	0	0	0.9	0	0.9
AT5G15750	NUC-L1	630199	611760	3702.AT5G15750.1	3702.AT1G48920.1	0	0	0	0	0	0	0.9	0	0.9
AT5G15750	RRP4	630199	608092	3702.AT5G15750.1	3702.AT1G03360.1	0	0	0	0	0	0	0.9	0	0.9
LOX4	AT1G24140	614050	610285	3702.AT1G72520.1	3702.AT1G24140.1	0	0	0	0	0	0	0.9	0	0.9
Hsp70b	SR45a	609455	608509	3702.AT1G16030.1	3702.AT1G07350.1	0	0	0	0	0	0	0.9	0	0.9
AT1G63810	NUC-L1	613137	611760	3702.AT1G63810.1	3702.AT1G48920.1	0	0	0	0	0	0.048	0.9	0	0.9
RDUF2	AT1G26800	634177	610492	3702.AT5G59550.1	3702.AT1G26800.1	0	0	0	0.758	0	0	0.9	0	0.9
CPR	PHS2	623360	622844	3702.AT3G51800.2	3702.AT3G46970.1	0	0	0	0	0	0	0.9	0	0.9
AT3G57490	AT2G18900	623961	616045	3702.AT3G57490.1	3702.AT2G18900.1	0	0	0	0	0	0	0.9	0	0.9
ROC1	PHS2	628579	622844	3702.AT4G38740.1	3702.AT3G46970.1	0	0	0	0	0	0	0.9	0	0.9
AT3G09720	RRP4	620081	608092	3702.AT3G09720.1	3702.AT1G03360.1	0	0	0	0	0	0	0.9	0	0.9
HSFB2A	HSFA8	634433	613583	3702.AT5G62020.1	3702.AT1G67970.1	0	0	0	0.738	0	0	0.9	0	0.9
PHS2	NIA1	622844	614589	3702.AT3G46970.1	3702.AT1G77760.1	0	0	0	0	0	0	0.9	0	0.9
HSF4	HSFA8	628396	613583	3702.AT4G36990.1	3702.AT1G67970.1	0	0	0	0.762	0	0	0.9	0	0.9
TCH2	FBA6	631798	617912	3702.AT5G37770.1	3702.AT2G36460.1	0	0	0	0	0	0.043	0.9	0	0.9
AT4G28450	AT3G57490	627468	623961	3702.AT4G28450.1	3702.AT3G57490.1	0	0	0	0	0	0	0.9	0	0.9
AT3G57490	AT3G21540	623961	621403	3702.AT3G57490.1	3702.AT3G21540.1	0	0	0	0	0	0	0.9	0	0.9
ROC1	PFK3	628579	627229	3702.AT4G38740.1	3702.AT4G26270.1	0	0	0	0	0	0	0.9	0	0.9
AT3G21540	NUC-L1	621403	611760	3702.AT3G21540.1	3702.AT1G48920.1	0	0	0	0	0	0	0.9	0	0.9
FBA5	PHS2	627259	622844	3702.AT4G26530.2	3702.AT3G46970.1	0	0	0	0	0	0.049	0.9	0	0.9
ALIS1	AT1G52190	620413	612087	3702.AT3G12740.1	3702.AT1G52190.1	0	0	0	0	0	0	0.9	0	0.9
AT1G66500	SR45a	613426	608509	3702.AT1G66500.1	3702.AT1G07350.1	0	0	0	0	0	0	0.9	0	0.9
AT3G10300	AT1G13340	620146	609164	3702.AT3G10300.3	3702.AT1G13340.1	0	0	0	0	0	0	0.9	0	0.9
AT3G21540	AT3G09720	621403	620081	3702.AT3G21540.1	3702.AT3G09720.1	0	0	0	0	0	0	0.9	0	0.9
TCH2	AT1G16350	631798	609484	3702.AT5G37770.1	3702.AT1G16350.1	0	0	0	0	0	0.048	0.9	0	0.9
RDUF2	RDUF1	634177	622806	3702.AT5G59550.1	3702.AT3G46620.1	0	0	0	0.971	0	0	0.9	0	0.9
AT1G06720	RRP4	608446	608092	3702.AT1G06720.1	3702.AT1G03360.1	0	0	0	0	0	0	0.9	0	0.9
PHS2	TRBAMY	622844	621670	3702.AT3G46970.1	3702.AT3G23920.1	0	0	0	0	0	0	0.9	0	0.9
Hsp70-2	AT3G09440	628884	620055	3702.AT5G02490.1	3702.AT3G09440.1	0	0	0	0.985	0	0	0.9	0	0.9
AT2G18900	NUC-L1	616045	611760	3702.AT2G18900.1	3702.AT1G48920.1	0	0	0	0	0	0	0.9	0	0.9
PFK3	LOX4	627229	614050	3702.AT4G26270.1	3702.AT1G72520.1	0	0	0	0	0	0	0.9	0	0.9
LOX1	AT1G24140	612391	610285	3702.AT1G55020.1	3702.AT1G24140.1	0	0	0	0	0	0	0.9	0	0.9
AT3G54510	AT1G11960	623647	609018	3702.AT3G54510.2	3702.AT1G11960.1	0	0	0	0.821	0	0	0.9	0	0.9
HSP70	Hsp70b	620395	609455	3702.AT3G12580.1	3702.AT1G16030.1	0	0	0	0.983	0	0	0.9	0	0.9
HCT	TT4	633027	630014	3702.AT5G48930.1	3702.AT5G13930.1	0	0	0	0	0	0	0.9	0	0.9
AT3G09720	AT3G06530	620081	619794	3702.AT3G09720.1	3702.AT3G06530.2	0	0	0	0	0	0	0.9	0	0.9
Hsp70-2	LOX3	628884	609594	3702.AT5G02490.1	3702.AT1G17420.1	0	0	0	0	0	0	0.9	0	0.9
KAT5	AT3G43670	633021	622502	3702.AT5G48880.2	3702.AT3G43670.1	0	0	0	0	0	0	0.9	0	0.9
AT5G22100	AT3G57490	630804	623961	3702.AT5G22100.1	3702.AT3G57490.1	0	0	0	0	0	0	0.9	0	0.9
AT4G28450	RRP4	627468	608092	3702.AT4G28450.1	3702.AT1G03360.1	0	0	0	0	0	0	0.9	0	0.9
HSP90.1	LOX1	633425	612391	3702.AT5G52640.1	3702.AT1G55020.1	0	0	0	0	0	0	0.9	0	0.9
RBOHD	AT2G40460	632911	618346	3702.AT5G47910.1	3702.AT2G40460.1	0	0	0	0	0	0	0.9	0	0.9
Hsp70-2	SR45a	628884	608509	3702.AT5G02490.1	3702.AT1G07350.1	0	0	0	0	0	0	0.9	0	0.9
Hsp70-2	AT1G66500	628884	613426	3702.AT5G02490.1	3702.AT1G66500.1	0	0	0	0	0	0	0.9	0	0.9
AT5G08600	AT3G09720	629535	620081	3702.AT5G08600.2	3702.AT3G09720.1	0	0	0	0	0	0	0.9	0	0.9
ROC1	AT1G75510	628579	614358	3702.AT4G38740.1	3702.AT1G75510.1	0	0	0	0	0	0	0.9	0	0.9
ROC1	LOX3	628579	609594	3702.AT4G38740.1	3702.AT1G17420.1	0	0	0	0	0	0	0.9	0	0.9
PFK3	LOX1	627229	612391	3702.AT4G26270.1	3702.AT1G55020.1	0	0	0	0	0	0	0.9	0	0.9
NRT1.7	AT1G24140	613787	610285	3702.AT1G69870.1	3702.AT1G24140.1	0	0	0	0	0	0	0.9	0	0.9
ROC1	LOX1	628579	612391	3702.AT4G38740.1	3702.AT1G55020.1	0	0	0	0	0	0	0.9	0	0.9
AT5G14520	AT1G79150	630075	614735	3702.AT5G14520.1	3702.AT1G79150.1	0	0	0	0	0	0.896	0	0	0.896
NAP57	AT3G05060	623927	619621	3702.AT3G57150.1	3702.AT3G05060.1	0	0	0	0	0	0.78	0.54	0	0.894
AT5G27120	NAP57	631316	623927	3702.AT5G27120.1	3702.AT3G57150.1	0	0	0	0	0	0.78	0.54	0	0.894
AT5G14520	AT4G15770	630075	626072	3702.AT5G14520.1	3702.AT4G15770.1	0	0	0	0	0	0.892	0	0	0.892
LHCA4	PSAF	622888	610943	3702.AT3G47470.1	3702.AT1G31330.1	0	0	0	0	0	0.834	0.36	0	0.889
AT5G15550	AT1G29320	630178	610735	3702.AT5G15550.1	3702.AT1G29320.1	0	0	0	0	0	0.889	0	0	0.889
AT4G04940	EDA7	625105	623909	3702.AT4G04940.1	3702.AT3G56990.1	0	0	0	0	0	0.883	0	0	0.883
AT3G57000	AT1G31660	623910	610973	3702.AT3G57000.1	3702.AT1G31660.1	0	0	0	0	0	0.883	0	0	0.883
AT1G31660	PWP2	610973	609393	3702.AT1G31660.1	3702.AT1G15440.1	0	0	0	0	0	0.882	0	0	0.882
AT4G04940	AT1G31660	625105	610973	3702.AT4G04940.1	3702.AT1G31660.1	0	0	0	0	0	0.88	0	0	0.88
AT5G15750	AT1G31660	630199	610973	3702.AT5G15750.1	3702.AT1G31660.1	0	0	0	0	0	0.88	0	0	0.88
AT1G63810	AT1G31660	613137	610973	3702.AT1G63810.1	3702.AT1G31660.1	0	0	0	0	0	0.88	0	0	0.88
AT5G14520	EDA25	630075	614042	3702.AT5G14520.1	3702.AT1G72440.1	0	0	0	0	0	0.879	0	0	0.879
AT4G15770	EDA25	626072	614042	3702.AT4G15770.1	3702.AT1G72440.1	0	0	0	0	0	0.878	0	0	0.878
MEE49	AT1G23280	624780	610202	3702.AT4G01560.1	3702.AT1G23280.1	0	0	0	0	0	0.875	0	0	0.875
HSP70	CR88	620395	615213	3702.AT3G12580.1	3702.AT2G04030.1	0	0	0	0	0	0.875	0	0	0.875
AT1G76570	PSAF	614461	610943	3702.AT1G76570.1	3702.AT1G31330.1	0	0	0	0	0	0.812	0.36	0	0.874
AT5G15550	AT1G25260	630178	610373	3702.AT5G15550.1	3702.AT1G25260.1	0	0	0	0	0	0.872	0	0	0.872
LHCA4	PSAD-2	622888	608069	3702.AT3G47470.1	3702.AT1G03130.1	0	0	0	0	0	0.809	0.36	0	0.872
LHCA4	LHCB2.1	622888	615304	3702.AT3G47470.1	3702.AT2G05100.1	0	0	0	0.782	0	0.73	0.54	0	0.87
LHCB2.1	CAB3	615304	610795	3702.AT2G05100.1	3702.AT1G29910.1	0	0	0	0.975	0	0.731	0.54	0	0.87
LHCA4	LHCB2.2	622888	615303	3702.AT3G47470.1	3702.AT2G05070.1	0	0	0	0.782	0	0.73	0.54	0	0.87
AT1G29320	AT1G23280	610735	610202	3702.AT1G29320.1	3702.AT1G23280.1	0	0	0	0	0	0.87	0	0	0.87
LHCB2.3	CAB3	622087	610795	3702.AT3G27690.1	3702.AT1G29910.1	0	0	0	0.975	0	0.731	0.54	0	0.87
LHCA4	LHCB2.3	622888	622087	3702.AT3G47470.1	3702.AT3G27690.1	0	0	0	0.777	0	0.73	0.54	0	0.87
LHCB2.2	CAB3	615303	610795	3702.AT2G05070.1	3702.AT1G29910.1	0	0	0	0.976	0	0.731	0.54	0	0.87
AT4G28450	AT1G31660	627468	610973	3702.AT4G28450.1	3702.AT1G31660.1	0	0	0	0	0	0.865	0	0	0.865
EDA7	PWP2	623909	609393	3702.AT3G56990.1	3702.AT1G15440.1	0	0	0	0	0	0.865	0	0	0.865
AT5G66540	AT1G31660	634922	610973	3702.AT5G66540.1	3702.AT1G31660.1	0	0	0	0	0	0.861	0	0	0.861
AT3G10530	AT1G31660	620173	610973	3702.AT3G10530.1	3702.AT1G31660.1	0	0	0	0	0	0.86	0	0	0.86
AT1G79150	AT1G23280	614735	610202	3702.AT1G79150.1	3702.AT1G23280.1	0	0	0	0	0	0.858	0	0	0.858
RPC14	ATRPAC42	617158	612815	3702.AT2G29540.3	3702.AT1G60850.1	0	0	0	0	0	0.858	0	0	0.858
AT3G57940	AT3G10530	624006	620173	3702.AT3G57940.1	3702.AT3G10530.1	0	0	0	0	0	0.857	0	0	0.857
AT2G37990	AT1G25260	618078	610373	3702.AT2G37990.1	3702.AT1G25260.1	0	0	0	0	0	0.857	0	0	0.857
AT5G15550	MEE49	630178	624780	3702.AT5G15550.1	3702.AT4G01560.1	0	0	0	0	0	0.857	0	0	0.857
AT4G15770	AT1G29320	626072	610735	3702.AT4G15770.1	3702.AT1G29320.1	0	0	0	0	0	0.857	0	0	0.857
AT3G57940	AT1G06720	624006	608446	3702.AT3G57940.1	3702.AT1G06720.1	0	0	0	0	0	0.857	0	0	0.857
AT5G22100	AT1G31660	630804	610973	3702.AT5G22100.1	3702.AT1G31660.1	0	0	0	0	0	0.857	0	0	0.857
AT3G57940	AT3G21540	624006	621403	3702.AT3G57940.1	3702.AT3G21540.1	0	0	0	0	0	0.857	0	0	0.857
AT4G16630	PUM24	626179	620884	3702.AT4G16630.1	3702.AT3G16810.1	0	0	0	0	0	0.857	0	0	0.857
AT5G14520	AT1G29320	630075	610735	3702.AT5G14520.1	3702.AT1G29320.1	0	0	0	0	0	0.857	0	0	0.857
AT5G15550	AT4G15770	630178	626072	3702.AT5G15550.1	3702.AT4G15770.1	0	0	0	0	0	0.857	0	0	0.857
AT2G40360	AT1G23280	618335	610202	3702.AT2G40360.1	3702.AT1G23280.1	0	0	0	0	0	0.857	0	0	0.857
MEE49	AT2G40360	624780	618335	3702.AT4G01560.1	3702.AT2G40360.1	0	0	0	0	0	0.857	0	0	0.857
ATRPAC42	NRPA2	612815	610798	3702.AT1G60850.1	3702.AT1G29940.1	0	0	0	0	0	0.857	0	0	0.857
EDA7	AT1G06720	623909	608446	3702.AT3G56990.1	3702.AT1G06720.1	0	0	0	0	0	0.857	0	0	0.857
AT3G15460	AT1G79150	620738	614735	3702.AT3G15460.1	3702.AT1G79150.1	0	0	0	0	0	0.856	0	0	0.856
AT3G13940	ATRPAC42	620567	612815	3702.AT3G13940.1	3702.AT1G60850.1	0	0	0	0	0	0.856	0	0	0.856
AT1G79150	AT1G52930	614735	612167	3702.AT1G79150.1	3702.AT1G52930.1	0	0	0	0	0	0.856	0	0	0.856
AT4G25730	AT1G23280	627171	610202	3702.AT4G25730.1	3702.AT1G23280.1	0	0	0	0	0	0.855	0	0	0.855
AT3G15460	AT1G25260	620738	610373	3702.AT3G15460.1	3702.AT1G25260.1	0	0	0	0	0	0.854	0	0	0.854
AT1G52930	AT1G25260	612167	610373	3702.AT1G52930.1	3702.AT1G25260.1	0	0	0	0	0	0.854	0	0	0.854
AT3G11964	AT1G31660	620332	610973	3702.AT3G11964.1	3702.AT1G31660.1	0	0	0	0	0	0.853	0	0	0.853
AT3G57940	EDA7	624006	623909	3702.AT3G57940.1	3702.AT3G56990.1	0	0	0	0	0	0.853	0	0	0.853
AT5G14520	AT3G15460	630075	620738	3702.AT5G14520.1	3702.AT3G15460.1	0	0	0	0	0	0.85	0	0	0.85
AT5G14520	AT1G52930	630075	612167	3702.AT5G14520.1	3702.AT1G52930.1	0	0	0	0	0	0.85	0	0	0.85
REBELOTE	EDA25	623753	614042	3702.AT3G55510.1	3702.AT1G72440.1	0	0	0	0	0	0.847	0	0	0.847
AT1G52930	AT1G23280	612167	610202	3702.AT1G52930.1	3702.AT1G23280.1	0	0	0	0	0	0.843	0	0	0.843
AT3G15460	AT1G23280	620738	610202	3702.AT3G15460.1	3702.AT1G23280.1	0	0	0	0	0	0.843	0	0	0.843
TOZ	AT3G57940	630307	624006	3702.AT5G16750.1	3702.AT3G57940.1	0	0	0	0	0	0.843	0	0	0.843
AT5G15550	AT1G23280	630178	610202	3702.AT5G15550.1	3702.AT1G23280.1	0	0	0	0	0	0.843	0	0	0.843
AT4G25730	AT1G25260	627171	610373	3702.AT4G25730.1	3702.AT1G25260.1	0	0	0	0	0	0.841	0	0	0.841
AT4G04940	AT3G57940	625105	624006	3702.AT4G04940.1	3702.AT3G57940.1	0	0	0	0	0	0.84	0	0	0.84
AT3G57940	AT3G57000	624006	623910	3702.AT3G57940.1	3702.AT3G57000.1	0	0	0	0	0	0.84	0	0	0.84
AT5G22100	AT3G57940	630804	624006	3702.AT5G22100.1	3702.AT3G57940.1	0	0	0	0	0	0.84	0	0	0.84
AT5G15750	AT3G57940	630199	624006	3702.AT5G15750.1	3702.AT3G57940.1	0	0	0	0	0	0.84	0	0	0.84
AT2G40360	AT1G52930	618335	612167	3702.AT2G40360.1	3702.AT1G52930.1	0	0	0	0	0	0.84	0	0	0.84
AT5G14520	AT4G25730	630075	627171	3702.AT5G14520.1	3702.AT4G25730.1	0	0	0	0	0	0.84	0	0	0.84
AT4G28450	AT3G57940	627468	624006	3702.AT4G28450.1	3702.AT3G57940.1	0	0	0	0	0	0.84	0	0	0.84
AT3G15460	AT2G40360	620738	618335	3702.AT3G15460.1	3702.AT2G40360.1	0	0	0	0	0	0.84	0	0	0.84
AT5G66540	AT3G57940	634922	624006	3702.AT5G66540.1	3702.AT3G57940.1	0	0	0	0	0	0.84	0	0	0.84
AT5G15550	AT1G52930	630178	612167	3702.AT5G15550.1	3702.AT1G52930.1	0	0	0	0	0	0.839	0	0	0.839
REBELOTE	AT1G25260	623753	610373	3702.AT3G55510.1	3702.AT1G25260.1	0	0	0	0	0	0.839	0	0	0.839
AT5G15550	AT3G15460	630178	620738	3702.AT5G15550.1	3702.AT3G15460.1	0	0	0	0	0	0.839	0	0	0.839
NSN1	AT2G37990	619849	618078	3702.AT3G07050.1	3702.AT2G37990.1	0	0	0	0	0	0.839	0	0	0.839
AT3G57940	AT1G63810	624006	613137	3702.AT3G57940.1	3702.AT1G63810.1	0	0	0	0	0	0.838	0	0	0.838
AT4G28450	PUM24	627468	620884	3702.AT4G28450.1	3702.AT3G16810.1	0	0	0	0	0	0.837	0	0	0.837
PUM24	EDA25	620884	614042	3702.AT3G16810.1	3702.AT1G72440.1	0	0	0	0	0	0.837	0	0	0.837
AT5G15750	EDA7	630199	623909	3702.AT5G15750.1	3702.AT3G56990.1	0	0	0	0	0	0.837	0	0	0.837
AT3G58660	PWP2	624079	609393	3702.AT3G58660.1	3702.AT1G15440.1	0	0	0	0	0	0.837	0	0	0.837
AT3G58660	AT1G06720	624079	608446	3702.AT3G58660.1	3702.AT1G06720.1	0	0	0	0	0	0.836	0	0	0.836
AT5G14520	REBELOTE	630075	623753	3702.AT5G14520.1	3702.AT3G55510.1	0	0	0	0	0	0.836	0	0	0.836
AT2G39240	NRPA2	618206	610798	3702.AT2G39240.1	3702.AT1G29940.1	0	0	0	0	0	0.836	0	0	0.836
AT5G14520	CPR	630075	623360	3702.AT5G14520.1	3702.AT3G51800.2	0	0	0	0	0	0.836	0	0	0.836
TOZ	PUM24	630307	620884	3702.AT5G16750.1	3702.AT3G16810.1	0	0	0	0	0	0.836	0	0	0.836
CPR	AT1G25260	623360	610373	3702.AT3G51800.2	3702.AT1G25260.1	0	0	0	0	0	0.836	0	0	0.836
AT3G58660	AT2G37990	624079	618078	3702.AT3G58660.1	3702.AT2G37990.1	0	0	0	0	0	0.836	0	0	0.836
RACK1C_AT	AT1G31660	621027	610973	3702.AT3G18130.1	3702.AT1G31660.1	0	0	0	0	0	0.836	0	0	0.836
AT5G27120	AT2G40360	631316	618335	3702.AT5G27120.1	3702.AT2G40360.1	0	0	0	0	0	0.836	0	0	0.836
AT3G05060	AT2G40360	619621	618335	3702.AT3G05060.1	3702.AT2G40360.1	0	0	0	0	0	0.836	0	0	0.836
EDA7	AT3G05060	623909	619621	3702.AT3G56990.1	3702.AT3G05060.1	0	0	0	0	0	0.835	0	0	0.835
MEE49	NSN1	624780	619849	3702.AT4G01560.1	3702.AT3G07050.1	0	0	0	0	0	0.835	0	0	0.835
AT5G27120	PUM24	631316	620884	3702.AT5G27120.1	3702.AT3G16810.1	0	0	0	0	0	0.835	0	0	0.835
AT5G27120	AT1G31660	631316	610973	3702.AT5G27120.1	3702.AT1G31660.1	0	0	0	0	0	0.835	0	0	0.835
PUM24	AT3G05060	620884	619621	3702.AT3G16810.1	3702.AT3G05060.1	0	0	0	0	0	0.835	0	0	0.835
AT3G58660	AT3G21540	624079	621403	3702.AT3G58660.1	3702.AT3G21540.1	0	0	0	0	0	0.835	0	0	0.835
AT5G14520	AT2G37990	630075	618078	3702.AT5G14520.1	3702.AT2G37990.1	0	0	0	0	0	0.835	0	0	0.835
AT4G25730	NSN1	627171	619849	3702.AT4G25730.1	3702.AT3G07050.1	0	0	0	0	0	0.835	0	0	0.835
AT5G27120	EDA7	631316	623909	3702.AT5G27120.1	3702.AT3G56990.1	0	0	0	0	0	0.835	0	0	0.835
AT5G14520	AT1G50920	630075	611953	3702.AT5G14520.1	3702.AT1G50920.1	0	0	0	0	0	0.835	0	0	0.835
NSN1	AT1G79150	619849	614735	3702.AT3G07050.1	3702.AT1G79150.1	0	0	0	0	0	0.835	0	0	0.835
AT3G05060	AT1G31660	619621	610973	3702.AT3G05060.1	3702.AT1G31660.1	0	0	0	0	0	0.835	0	0	0.835
AT3G58660	AT3G57000	624079	623910	3702.AT3G58660.1	3702.AT3G57000.1	0	0	0	0	0	0.835	0	0	0.835
AT2G37990	RPL3B	618078	612904	3702.AT2G37990.1	3702.AT1G61580.1	0	0	0	0	0	0.835	0	0	0.835
NAP57	PUM24	623927	620884	3702.AT3G57150.1	3702.AT3G16810.1	0	0	0	0	0	0.835	0	0	0.835
AT4G28450	AT3G58660	627468	624079	3702.AT4G28450.1	3702.AT3G58660.1	0	0	0	0	0	0.835	0	0	0.835
AT1G31660	AT1G06720	610973	608446	3702.AT1G31660.1	3702.AT1G06720.1	0	0	0	0	0	0.834	0	0	0.834
AT5G14520	MEE49	630075	624780	3702.AT5G14520.1	3702.AT4G01560.1	0	0	0	0	0	0.834	0	0	0.834
AT1G29320	AT1G25260	610735	610373	3702.AT1G29320.1	3702.AT1G25260.1	0	0	0	0	0	0.834	0	0	0.834
AT3G57940	NOP56	624006	612513	3702.AT3G57940.1	3702.AT1G56110.1	0	0	0	0	0	0.834	0	0	0.834
AT5G15750	AT3G58660	630199	624079	3702.AT5G15750.1	3702.AT3G58660.1	0	0	0	0	0	0.834	0	0	0.834
AT5G66540	AT3G58660	634922	624079	3702.AT5G66540.1	3702.AT3G58660.1	0	0	0	0	0	0.834	0	0	0.834
AT1G79150	AT1G29320	614735	610735	3702.AT1G79150.1	3702.AT1G29320.1	0	0	0	0	0	0.834	0	0	0.834
AT3G58660	AT3G06530	624079	619794	3702.AT3G58660.1	3702.AT3G06530.2	0	0	0	0	0	0.834	0	0	0.834
AT3G05060	AT1G79150	619621	614735	3702.AT3G05060.1	3702.AT1G79150.1	0	0	0	0	0	0.834	0	0	0.834
AT5G22100	AT3G58660	630804	624079	3702.AT5G22100.1	3702.AT3G58660.1	0	0	0	0	0	0.834	0	0	0.834
TOZ	AT3G58660	630307	624079	3702.AT5G16750.1	3702.AT3G58660.1	0	0	0	0	0	0.834	0	0	0.834
TOZ	AT1G31660	630307	610973	3702.AT5G16750.1	3702.AT1G31660.1	0	0	0	0	0	0.834	0	0	0.834
AT3G57940	AT1G31660	624006	610973	3702.AT3G57940.1	3702.AT1G31660.1	0	0	0	0	0	0.834	0	0	0.834
AT3G58660	AT3G10530	624079	620173	3702.AT3G58660.1	3702.AT3G10530.1	0	0	0	0	0	0.834	0	0	0.834
AT1G79150	AT1G25260	614735	610373	3702.AT1G79150.1	3702.AT1G25260.1	0	0	0	0	0	0.834	0	0	0.834
AT4G04940	AT3G58660	625105	624079	3702.AT4G04940.1	3702.AT3G58660.1	0	0	0	0	0	0.834	0	0	0.834
AT3G13940	RPC14	620567	617158	3702.AT3G13940.1	3702.AT2G29540.3	0	0	0	0	0	0.834	0	0	0.834
REBELOTE	AT1G63810	623753	613137	3702.AT3G55510.1	3702.AT1G63810.1	0	0	0	0	0	0.834	0	0	0.834
AT5G27120	AT1G79150	631316	614735	3702.AT5G27120.1	3702.AT1G79150.1	0	0	0	0	0	0.834	0	0	0.834
AT3G06530	AT1G31660	619794	610973	3702.AT3G06530.2	3702.AT1G31660.1	0	0	0	0	0	0.834	0	0	0.834
AT5G14520	AT1G23280	630075	610202	3702.AT5G14520.1	3702.AT1G23280.1	0	0	0	0	0	0.834	0	0	0.834
AT2G40360	AT1G25260	618335	610373	3702.AT2G40360.1	3702.AT1G25260.1	0	0	0	0	0	0.833	0	0	0.833
AT1G50920	AT1G25260	611953	610373	3702.AT1G50920.1	3702.AT1G25260.1	0	0	0	0	0	0.833	0	0	0.833
REBELOTE	AT2G37990	623753	618078	3702.AT3G55510.1	3702.AT2G37990.1	0	0	0	0	0	0.833	0	0	0.833
CPR	RPL3B	623360	612904	3702.AT3G51800.2	3702.AT1G61580.1	0	0	0	0	0	0.833	0	0	0.833
REBELOTE	PUM24	623753	620884	3702.AT3G55510.1	3702.AT3G16810.1	0	0	0	0	0	0.833	0	0	0.833
AT4G25730	AT1G29320	627171	610735	3702.AT4G25730.1	3702.AT1G29320.1	0	0	0	0	0	0.833	0	0	0.833
OLI2	AT2G40360	633787	618335	3702.AT5G55920.1	3702.AT2G40360.1	0	0	0	0	0	0.832	0	0	0.832
RACK1C_AT	RPL3B	621027	612904	3702.AT3G18130.1	3702.AT1G61580.1	0	0	0	0	0	0.832	0	0	0.832
OLI2	AT4G15770	633787	626072	3702.AT5G55920.1	3702.AT4G15770.1	0	0	0	0	0	0.832	0	0	0.832
MEE49	AT1G79150	624780	614735	3702.AT4G01560.1	3702.AT1G79150.1	0	0	0	0	0	0.832	0	0	0.832
AT4G26600	AT2G40360	627267	618335	3702.AT4G26600.1	3702.AT2G40360.1	0	0	0	0	0	0.832	0	0	0.832
AT4G25730	AT4G16630	627171	626179	3702.AT4G25730.1	3702.AT4G16630.1	0	0	0	0	0	0.832	0	0	0.832
AT4G25730	AT1G79150	627171	614735	3702.AT4G25730.1	3702.AT1G79150.1	0	0	0	0	0	0.832	0	0	0.832
AT4G26600	AT4G15770	627267	626072	3702.AT4G26600.1	3702.AT4G15770.1	0	0	0	0	0	0.832	0	0	0.832
AT2G40360	AT1G79150	618335	614735	3702.AT2G40360.1	3702.AT1G79150.1	0	0	0	0	0	0.832	0	0	0.832
AT5G14520	RPL3B	630075	612904	3702.AT5G14520.1	3702.AT1G61580.1	0	0	0	0	0	0.832	0	0	0.832
AT1G76570	PSAD-2	614461	608069	3702.AT1G76570.1	3702.AT1G03130.1	0	0	0	0	0	0.749	0.36	0	0.832
EDA7	AT1G31660	623909	610973	3702.AT3G56990.1	3702.AT1G31660.1	0	0	0	0	0	0.831	0	0	0.831
RPL3B	AT1G23280	612904	610202	3702.AT1G61580.1	3702.AT1G23280.1	0	0	0	0	0	0.831	0	0	0.831
AT4G15770	AT1G79150	626072	614735	3702.AT4G15770.1	3702.AT1G79150.1	0	0	0	0	0	0.831	0	0	0.831
AT4G15770	MEE49	626072	624780	3702.AT4G15770.1	3702.AT4G01560.1	0	0	0	0	0	0.831	0	0	0.831
CPR	AT2G37990	623360	618078	3702.AT3G51800.2	3702.AT2G37990.1	0	0	0	0	0	0.831	0	0	0.831
AT3G57940	AT2G18900	624006	616045	3702.AT3G57940.1	3702.AT2G18900.1	0	0	0	0	0	0.831	0	0	0.831
AT1G50920	AT1G29320	611953	610735	3702.AT1G50920.1	3702.AT1G29320.1	0	0	0	0	0	0.831	0	0	0.831
AT2G37990	AT1G50920	618078	611953	3702.AT2G37990.1	3702.AT1G50920.1	0	0	0	0	0	0.83	0	0	0.83
AT5G08600	AT3G57940	629535	624006	3702.AT5G08600.2	3702.AT3G57940.1	0	0	0	0	0	0.83	0	0	0.83
OLI2	AT1G25260	633787	610373	3702.AT5G55920.1	3702.AT1G25260.1	0	0	0	0	0	0.83	0	0	0.83
AT5G27120	AT3G57940	631316	624006	3702.AT5G27120.1	3702.AT3G57940.1	0	0	0	0	0	0.83	0	0	0.83
AT1G50920	AT1G23280	611953	610202	3702.AT1G50920.1	3702.AT1G23280.1	0	0	0	0	0	0.83	0	0	0.83
AT3G57940	AT3G05060	624006	619621	3702.AT3G57940.1	3702.AT3G05060.1	0	0	0	0	0	0.83	0	0	0.83
EDA7	AT3G10530	623909	620173	3702.AT3G56990.1	3702.AT3G10530.1	0	0	0	0	0	0.83	0	0	0.83
OLI2	AT5G15550	633787	630178	3702.AT5G55920.1	3702.AT5G15550.1	0	0	0	0	0	0.83	0	0	0.83
AT4G26600	AT1G25260	627267	610373	3702.AT4G26600.1	3702.AT1G25260.1	0	0	0	0	0	0.83	0	0	0.83
AT5G15550	AT4G26600	630178	627267	3702.AT5G15550.1	3702.AT4G26600.1	0	0	0	0	0	0.83	0	0	0.83
AT5G66540	MEE49	634922	624780	3702.AT5G66540.1	3702.AT4G01560.1	0	0	0	0	0	0.83	0	0	0.83
AT3G58660	NOP56	624079	612513	3702.AT3G58660.1	3702.AT1G56110.1	0	0	0	0	0	0.83	0	0	0.83
AT5G14520	AT4G16630	630075	626179	3702.AT5G14520.1	3702.AT4G16630.1	0	0	0	0	0	0.83	0	0	0.83
AT3G13940	AT2G39240	620567	618206	3702.AT3G13940.1	3702.AT2G39240.1	0	0	0	0	0	0.83	0	0	0.83
AT5G14520	PUM24	630075	620884	3702.AT5G14520.1	3702.AT3G16810.1	0	0	0	0	0	0.829	0	0	0.829
PUM24	AT1G25260	620884	610373	3702.AT3G16810.1	3702.AT1G25260.1	0	0	0	0	0	0.829	0	0	0.829
AT4G26600	AT1G79150	627267	614735	3702.AT4G26600.1	3702.AT1G79150.1	0	0	0	0	0	0.828	0	0	0.828
AT4G25730	AT3G05060	627171	619621	3702.AT4G25730.1	3702.AT3G05060.1	0	0	0	0	0	0.828	0	0	0.828
AT5G27120	AT4G25730	631316	627171	3702.AT5G27120.1	3702.AT4G25730.1	0	0	0	0	0	0.828	0	0	0.828
OLI2	AT5G14520	633787	630075	3702.AT5G55920.1	3702.AT5G14520.1	0	0	0	0	0	0.828	0	0	0.828
AT2G39240	RPC14	618206	617158	3702.AT2G39240.1	3702.AT2G29540.3	0	0	0	0	0	0.828	0	0	0.828
AT5G14520	AT4G26600	630075	627267	3702.AT5G14520.1	3702.AT4G26600.1	0	0	0	0	0	0.828	0	0	0.828
OLI2	AT1G79150	633787	614735	3702.AT5G55920.1	3702.AT1G79150.1	0	0	0	0	0	0.828	0	0	0.828
AT4G15770	AT2G40360	626072	618335	3702.AT4G15770.1	3702.AT2G40360.1	0	0	0	0	0	0.828	0	0	0.828
NAP57	NOP56	623927	612513	3702.AT3G57150.1	3702.AT1G56110.1	0	0	0	0	0	0.828	0	0	0.828
AT4G25730	MEE49	627171	624780	3702.AT4G25730.1	3702.AT4G01560.1	0	0	0	0	0	0.828	0	0	0.828
TOZ	MEE49	630307	624780	3702.AT5G16750.1	3702.AT4G01560.1	0	0	0	0	0	0.827	0	0	0.827
AT4G04940	PUM24	625105	620884	3702.AT4G04940.1	3702.AT3G16810.1	0	0	0	0	0	0.827	0	0	0.827
AT2G34357	AT1G79150	617686	614735	3702.AT2G34357.1	3702.AT1G79150.1	0	0	0	0	0	0.827	0	0	0.827
AT4G04940	MEE49	625105	624780	3702.AT4G04940.1	3702.AT4G01560.1	0	0	0	0	0	0.827	0	0	0.827
PUM24	AT2G37990	620884	618078	3702.AT3G16810.1	3702.AT2G37990.1	0	0	0	0	0	0.827	0	0	0.827
MEE49	AT3G06530	624780	619794	3702.AT4G01560.1	3702.AT3G06530.2	0	0	0	0	0	0.827	0	0	0.827
AT2G39240	ATRPAC42	618206	612815	3702.AT2G39240.1	3702.AT1G60850.1	0	0	0	0	0	0.827	0	0	0.827
MEE49	PWP2	624780	609393	3702.AT4G01560.1	3702.AT1G15440.1	0	0	0	0	0	0.826	0	0	0.826
TOZ	REBELOTE	630307	623753	3702.AT5G16750.1	3702.AT3G55510.1	0	0	0	0	0	0.826	0	0	0.826
LHCB2.1	PSAF	615304	610943	3702.AT2G05100.1	3702.AT1G31330.1	0	0	0	0	0	0.73	0.36	0	0.819
LHCB2.2	PSAF	615303	610943	3702.AT2G05070.1	3702.AT1G31330.1	0	0	0	0	0	0.73	0.36	0	0.819
LHCB2.3	PSAF	622087	610943	3702.AT3G27690.1	3702.AT1G31330.1	0	0	0	0	0	0.73	0.36	0	0.819
AT4G28450	AT4G16630	627468	626179	3702.AT4G28450.1	3702.AT4G16630.1	0	0	0	0	0	0.818	0	0	0.818
AT5G54910	AT1G63810	633677	613137	3702.AT5G54910.1	3702.AT1G63810.1	0	0	0	0	0	0.817	0	0	0.817
AT5G15550	AT4G25730	630178	627171	3702.AT5G15550.1	3702.AT4G25730.1	0	0	0	0	0	0.817	0	0	0.817
AT3G11964	EDA25	620332	614042	3702.AT3G11964.1	3702.AT1G72440.1	0	0	0	0	0	0.817	0	0	0.817
MEE49	AT1G06720	624780	608446	3702.AT4G01560.1	3702.AT1G06720.1	0	0	0	0	0	0.816	0	0	0.816
NSN1	AT1G25260	619849	610373	3702.AT3G07050.1	3702.AT1G25260.1	0	0	0	0	0	0.814	0	0	0.814
AT4G15770	AT1G52930	626072	612167	3702.AT4G15770.1	3702.AT1G52930.1	0	0	0	0	0	0.814	0	0	0.814
AT4G15770	AT3G15460	626072	620738	3702.AT4G15770.1	3702.AT3G15460.1	0	0	0	0	0	0.814	0	0	0.814
AT4G15770	AT1G25260	626072	610373	3702.AT4G15770.1	3702.AT1G25260.1	0	0	0	0	0	0.814	0	0	0.814
CPR	NSN1	623360	619849	3702.AT3G51800.2	3702.AT3G07050.1	0	0	0	0	0	0.814	0	0	0.814
RPL3B	AT1G29320	612904	610735	3702.AT1G61580.1	3702.AT1G29320.1	0	0	0	0	0	0.814	0	0	0.814
AT2G40360	AT1G50920	618335	611953	3702.AT2G40360.1	3702.AT1G50920.1	0	0	0	0	0	0.814	0	0	0.814
AT4G25730	AT2G40360	627171	618335	3702.AT4G25730.1	3702.AT2G40360.1	0	0	0	0	0	0.814	0	0	0.814
AT4G15770	NSN1	626072	619849	3702.AT4G15770.1	3702.AT3G07050.1	0	0	0	0	0	0.814	0	0	0.814
AT5G14520	AT3G58660	630075	624079	3702.AT5G14520.1	3702.AT3G58660.1	0	0	0	0	0	0.813	0	0	0.813
EDA7	AT3G11964	623909	620332	3702.AT3G56990.1	3702.AT3G11964.1	0	0	0	0	0	0.812	0	0	0.812
NAP57	REBELOTE	623927	623753	3702.AT3G57150.1	3702.AT3G55510.1	0	0	0	0	0	0.812	0	0	0.812
EDA7	AT3G21540	623909	621403	3702.AT3G56990.1	3702.AT3G21540.1	0	0	0	0	0	0.812	0	0	0.812
AT4G15770	AT1G23280	626072	610202	3702.AT4G15770.1	3702.AT1G23280.1	0	0	0	0	0	0.812	0	0	0.812
AT5G22100	EDA7	630804	623909	3702.AT5G22100.1	3702.AT3G56990.1	0	0	0	0	0	0.812	0	0	0.812
AT4G28450	EDA7	627468	623909	3702.AT4G28450.1	3702.AT3G56990.1	0	0	0	0	0	0.812	0	0	0.812
TOZ	EDA7	630307	623909	3702.AT5G16750.1	3702.AT3G56990.1	0	0	0	0	0	0.812	0	0	0.812
NSN1	AT1G50920	619849	611953	3702.AT3G07050.1	3702.AT1G50920.1	0	0	0	0	0	0.812	0	0	0.812
EDA7	AT3G06530	623909	619794	3702.AT3G56990.1	3702.AT3G06530.2	0	0	0	0	0	0.812	0	0	0.812
MEE49	AT1G25260	624780	610373	3702.AT4G01560.1	3702.AT1G25260.1	0	0	0	0	0	0.812	0	0	0.812
AT3G57000	EDA7	623910	623909	3702.AT3G57000.1	3702.AT3G56990.1	0	0	0	0	0	0.812	0	0	0.812
AT1G25260	AT1G23280	610373	610202	3702.AT1G25260.1	3702.AT1G23280.1	0	0	0	0	0	0.812	0	0	0.812
IDH-V	ALDH5F1	628967	614761	3702.AT5G03290.1	3702.AT1G79440.1	0	0	0	0	0	0.095	0.8	0	0.811
AT3G58660	AT3G05060	624079	619621	3702.AT3G58660.1	3702.AT3G05060.1	0	0	0	0	0	0.811	0	0	0.811
AT5G27120	AT3G58660	631316	624079	3702.AT5G27120.1	3702.AT3G58660.1	0	0	0	0	0	0.811	0	0	0.811
AT4G16630	NAP57	626179	623927	3702.AT4G16630.1	3702.AT3G57150.1	0	0	0	0	0	0.81	0	0	0.81
OLI2	EDA25	633787	614042	3702.AT5G55920.1	3702.AT1G72440.1	0	0	0	0	0	0.81	0	0	0.81
OLI2	MEE49	633787	624780	3702.AT5G55920.1	3702.AT4G01560.1	0	0	0	0	0	0.81	0	0	0.81
AT4G26600	MEE49	627267	624780	3702.AT4G26600.1	3702.AT4G01560.1	0	0	0	0	0	0.81	0	0	0.81
AT4G26600	EDA25	627267	614042	3702.AT4G26600.1	3702.AT1G72440.1	0	0	0	0	0	0.81	0	0	0.81
RPL3P	AT2G42710	620955	618587	3702.AT3G17465.1	3702.AT2G42710.1	0	0	0	0	0	0.81	0	0	0.81
AT3G57940	AT3G11964	624006	620332	3702.AT3G57940.1	3702.AT3G11964.1	0	0	0	0	0	0.809	0	0	0.809
NOP56	AT1G31660	612513	610973	3702.AT1G56110.1	3702.AT1G31660.1	0	0	0	0	0	0.809	0	0	0.809
AT1G52930	AT1G29320	612167	610735	3702.AT1G52930.1	3702.AT1G29320.1	0	0	0	0	0	0.808	0	0	0.808
AT3G15460	AT1G29320	620738	610735	3702.AT3G15460.1	3702.AT1G29320.1	0	0	0	0	0	0.808	0	0	0.808
MEE49	AT3G15460	624780	620738	3702.AT4G01560.1	3702.AT3G15460.1	0	0	0	0	0	0.808	0	0	0.808
MEE49	AT1G52930	624780	612167	3702.AT4G01560.1	3702.AT1G52930.1	0	0	0	0	0	0.808	0	0	0.808
NSN1	AT1G29320	619849	610735	3702.AT3G07050.1	3702.AT1G29320.1	0	0	0	0	0	0.807	0	0	0.807
MEE49	AT3G10530	624780	620173	3702.AT4G01560.1	3702.AT3G10530.1	0	0	0	0	0	0.806	0	0	0.806
AT3G58660	AT3G57940	624079	624006	3702.AT3G58660.1	3702.AT3G57940.1	0	0	0	0	0	0.806	0	0	0.806
AT4G25730	AT1G52930	627171	612167	3702.AT4G25730.1	3702.AT1G52930.1	0	0	0	0	0	0.806	0	0	0.806
AT3G58660	AT2G18900	624079	616045	3702.AT3G58660.1	3702.AT2G18900.1	0	0	0	0	0	0.806	0	0	0.806
AT5G15550	AT1G50920	630178	611953	3702.AT5G15550.1	3702.AT1G50920.1	0	0	0	0	0	0.806	0	0	0.806
AT4G25730	AT3G15460	627171	620738	3702.AT4G25730.1	3702.AT3G15460.1	0	0	0	0	0	0.806	0	0	0.806
AT3G13940	AT3G05060	620567	619621	3702.AT3G13940.1	3702.AT3G05060.1	0	0	0	0	0	0.805	0	0	0.805
AT5G27120	AT3G13940	631316	620567	3702.AT5G27120.1	3702.AT3G13940.1	0	0	0	0	0	0.805	0	0	0.805
AT2G40360	NOP56	618335	612513	3702.AT2G40360.1	3702.AT1G56110.1	0	0	0	0	0	0.804	0	0	0.804
AT4G26600	PUM24	627267	620884	3702.AT4G26600.1	3702.AT3G16810.1	0	0	0	0	0	0.804	0	0	0.804
AT3G57490	AT1G31660	623961	610973	3702.AT3G57490.1	3702.AT1G31660.1	0	0	0	0	0	0.804	0	0	0.804
OLI2	PUM24	633787	620884	3702.AT5G55920.1	3702.AT3G16810.1	0	0	0	0	0	0.804	0	0	0.804
AT5G22100	MEE49	630804	624780	3702.AT5G22100.1	3702.AT4G01560.1	0	0	0	0	0	0.803	0	0	0.803
AT4G16630	AT3G05060	626179	619621	3702.AT4G16630.1	3702.AT3G05060.1	0	0	0	0	0	0.803	0	0	0.803
OLI2	AT1G23280	633787	610202	3702.AT5G55920.1	3702.AT1G23280.1	0	0	0	0	0	0.803	0	0	0.803
RPL3B	AT1G25260	612904	610373	3702.AT1G61580.1	3702.AT1G25260.1	0	0	0	0	0	0.803	0	0	0.803
AT4G28450	MEE49	627468	624780	3702.AT4G28450.1	3702.AT4G01560.1	0	0	0	0	0	0.803	0	0	0.803
PUM24	AT3G15460	620884	620738	3702.AT3G16810.1	3702.AT3G15460.1	0	0	0	0	0	0.803	0	0	0.803
PUM24	AT1G52930	620884	612167	3702.AT3G16810.1	3702.AT1G52930.1	0	0	0	0	0	0.803	0	0	0.803
AT4G26600	AT1G23280	627267	610202	3702.AT4G26600.1	3702.AT1G23280.1	0	0	0	0	0	0.803	0	0	0.803
AT5G27120	AT4G16630	631316	626179	3702.AT5G27120.1	3702.AT4G16630.1	0	0	0	0	0	0.803	0	0	0.803
MEE49	AT3G57000	624780	623910	3702.AT4G01560.1	3702.AT3G57000.1	0	0	0	0	0	0.803	0	0	0.803
MEE49	AT3G21540	624780	621403	3702.AT4G01560.1	3702.AT3G21540.1	0	0	0	0	0	0.803	0	0	0.803
AT1G79150	AT1G50920	614735	611953	3702.AT1G79150.1	3702.AT1G50920.1	0	0	0	0	0	0.802	0	0	0.802
PUM24	NOP56	620884	612513	3702.AT3G16810.1	3702.AT1G56110.1	0	0	0	0	0	0.801	0	0	0.801
MEE49	EDA7	624780	623909	3702.AT4G01560.1	3702.AT3G56990.1	0	0	0	0	0	0.801	0	0	0.801
AK2	AT4G24830	630028	627072	3702.AT5G14060.2	3702.AT4G24830.1	0	0	0	0	0	0	0.8	0	0.8
ASN2	ASN1	634754	622874	3702.AT5G65010.2	3702.AT3G47340.1	0	0	0	0.98	0	0	0.8	0	0.8
AO	AK2	630099	630028	3702.AT5G14760.1	3702.AT5G14060.2	0	0	0	0	0	0	0.8	0	0.8
AT1G25230	PAP3	610370	609314	3702.AT1G25230.1	3702.AT1G14700.1	0	0	0	0.966	0	0	0.8	0	0.8
RUP1	CRY1	633383	625306	3702.AT5G52250.1	3702.AT4G08920.1	0	0	0	0	0	0	0.8	0	0.8
RUP1	SPA1	633383	618970	3702.AT5G52250.1	3702.AT2G46340.1	0	0	0	0.767	0	0	0.8	0	0.8
WRKY33	WRKY25	618130	617232	3702.AT2G38470.1	3702.AT2G30250.1	0	0	0	0.873	0	0	0.8	0	0.8
DOGT1	UGT73C1	617948	617943	3702.AT2G36800.1	3702.AT2G36750.1	0	0	0	0.979	0	0	0.8	0	0.8
RUP1	CRY2	633383	608194	3702.AT5G52250.1	3702.AT1G04400.1	0	0	0	0	0	0	0.8	0	0.8
CRY1	CRY2	625306	608194	3702.AT4G08920.1	3702.AT1G04400.1	0	0	0	0.948	0	0	0.8	0	0.8
PAP17	PAP3	620993	609314	3702.AT3G17790.1	3702.AT1G14700.1	0	0	0	0.963	0	0	0.8	0	0.8
RUP1	HY5	633383	629775	3702.AT5G52250.1	3702.AT5G11260.1	0	0	0	0	0	0	0.8	0	0.8
PAP17	AT1G25230	620993	610370	3702.AT3G17790.1	3702.AT1G25230.1	0	0	0	0.96	0	0	0.8	0	0.8
RUP1	GI	633383	610142	3702.AT5G52250.1	3702.AT1G22770.1	0	0	0	0	0	0	0.8	0	0.8
CHIL	TT5	629179	623713	3702.AT5G05270.1	3702.AT3G55120.1	0	0	0	0.695	0	0	0.8	0	0.8
TT4	4CL3	630014	613271	3702.AT5G13930.1	3702.AT1G65060.1	0	0	0	0	0	0	0.8	0	0.8
ACS6	MPK3	625551	622703	3702.AT4G11280.1	3702.AT3G45640.1	0	0	0	0	0	0	0.8	0	0.8
AO	IDH-V	630099	628967	3702.AT5G14760.1	3702.AT5G03290.1	0	0	0	0	0	0	0.8	0	0.8
LHB1B1	CAB3	617694	610795	3702.AT2G34430.1	3702.AT1G29910.1	0	0	0	0.985	0	0.8	0	0	0.8
DOGT1	UGT85A1	617948	610105	3702.AT2G36800.1	3702.AT1G22400.1	0	0	0	0.745	0	0	0.8	0	0.8
JAR1	GSTU20	618972	614650	3702.AT2G46370.4	3702.AT1G78370.1	0	0	0	0	0	0.8	0	0	0.8
UGT73C1	UGT85A1	617943	610105	3702.AT2G36750.1	3702.AT1G22400.1	0	0	0	0.751	0	0	0.8	0	0.8
TT4	4CL1	630014	612034	3702.AT5G13930.1	3702.AT1G51680.1	0	0	0	0	0	0	0.8	0	0.8
AT4G27130	RACK1C_AT	627322	621027	3702.AT4G27130.1	3702.AT3G18130.1	0	0	0	0	0	0.796	0	0	0.796
NSN1	NOP56	619849	612513	3702.AT3G07050.1	3702.AT1G56110.1	0	0	0	0	0	0.796	0	0	0.796
AT5G54940	RACK1C_AT	633680	621027	3702.AT5G54940.1	3702.AT3G18130.1	0	0	0	0	0	0.796	0	0	0.796
AT4G13170	RACK1C_AT	625749	621027	3702.AT4G13170.1	3702.AT3G18130.1	0	0	0	0	0	0.796	0	0	0.796
AT2G18900	AT1G31660	616045	610973	3702.AT2G18900.1	3702.AT1G31660.1	0	0	0	0	0	0.794	0	0	0.794
AT5G08600	AT3G58660	629535	624079	3702.AT5G08600.2	3702.AT3G58660.1	0	0	0	0	0	0.794	0	0	0.794
OLI2	NSN1	633787	619849	3702.AT5G55920.1	3702.AT3G07050.1	0	0	0	0	0	0.793	0	0	0.793
AT4G26600	NSN1	627267	619849	3702.AT4G26600.1	3702.AT3G07050.1	0	0	0	0	0	0.793	0	0	0.793
EDA25	AT1G50920	614042	611953	3702.AT1G72440.1	3702.AT1G50920.1	0	0	0	0	0	0.792	0	0	0.792
ckl4	CRY2	627516	608194	3702.AT4G28860.1	3702.AT1G04400.1	0	0	0	0	0	0.79	0	0	0.79
ckl3	CRY2	627518	608194	3702.AT4G28880.1	3702.AT1G04400.1	0	0	0	0	0	0.79	0	0	0.79
AT5G15550	AT3G58660	630178	624079	3702.AT5G15550.1	3702.AT3G58660.1	0	0	0	0	0	0.79	0	0	0.79
SNRK2.2	HAI2	623216	608517	3702.AT3G50500.2	3702.AT1G07430.1	0	0	0	0	0	0.494	0.6	0	0.789
RGL1	PIF3	613410	608747	3702.AT1G66350.1	3702.AT1G09530.2	0	0	0	0	0	0.488	0.6	0	0.786
MEE49	AT1G50920	624780	611953	3702.AT4G01560.1	3702.AT1G50920.1	0	0	0	0	0	0.786	0	0	0.786
AT3G58660	AT1G63810	624079	613137	3702.AT3G58660.1	3702.AT1G63810.1	0	0	0	0	0	0.785	0	0	0.785
AT4G16630	NOP56	626179	612513	3702.AT4G16630.1	3702.AT1G56110.1	0	0	0	0	0	0.782	0	0	0.782
MEE49	AT3G58660	624780	624079	3702.AT4G01560.1	3702.AT3G58660.1	0	0	0	0	0	0.779	0	0	0.779
AT4G26600	AT4G25730	627267	627171	3702.AT4G26600.1	3702.AT4G25730.1	0	0	0	0	0	0.778	0	0	0.778
OLI2	AT4G25730	633787	627171	3702.AT5G55920.1	3702.AT4G25730.1	0	0	0	0	0	0.778	0	0	0.778
RLP23	SOBIR1	617499	617413	3702.AT2G32680.1	3702.AT2G31880.1	0	0	0	0.553	0	0.776	0	0	0.776
AT2G40360	RPL3B	618335	612904	3702.AT2G40360.1	3702.AT1G61580.1	0	0	0	0	0	0.776	0	0	0.776
AT4G25730	PUM24	627171	620884	3702.AT4G25730.1	3702.AT3G16810.1	0	0	0	0	0	0.776	0	0	0.776
MEE49	AT3G57940	624780	624006	3702.AT4G01560.1	3702.AT3G57940.1	0	0	0	0	0	0.775	0	0	0.775
AT2G30600	CUL3	617270	610496	3702.AT2G30600.5	3702.AT1G26830.1	0	0	0	0	0	0.774	0	0	0.774
AT4G26600	AT1G63810	627267	613137	3702.AT4G26600.1	3702.AT1G63810.1	0	0	0	0	0	0.773	0	0	0.773
EDA7	AT3G09720	623909	620081	3702.AT3G56990.1	3702.AT3G09720.1	0	0	0	0	0	0.773	0	0	0.773
AT4G25730	NOP56	627171	612513	3702.AT4G25730.1	3702.AT1G56110.1	0	0	0	0	0	0.773	0	0	0.773
OLI2	AT1G63810	633787	613137	3702.AT5G55920.1	3702.AT1G63810.1	0	0	0	0	0	0.773	0	0	0.773
AT4G25730	AT2G37990	627171	618078	3702.AT4G25730.1	3702.AT2G37990.1	0	0	0	0	0	0.772	0	0	0.772
AT4G04940	REBELOTE	625105	623753	3702.AT4G04940.1	3702.AT3G55510.1	0	0	0	0	0	0.772	0	0	0.772
KDR	HFR1	610509	607982	3702.AT1G26945.1	3702.AT1G02340.1	0	0	0	0	0	0.765	0	0	0.765
CIB1	CRY2	628135	608194	3702.AT4G34530.1	3702.AT1G04400.1	0	0	0	0	0	0.765	0	0	0.765
PAT3	PHYA	618046	608751	3702.AT2G37678.1	3702.AT1G09570.1	0	0	0	0	0	0.765	0	0	0.765
ZTL	HSP81-2	633942	633798	3702.AT5G57360.2	3702.AT5G56030.2	0	0	0	0	0	0.765	0	0	0.765
ANK6	SIGE	634352	631019	3702.AT5G61230.1	3702.AT5G24120.1	0	0	0	0	0	0.765	0	0	0.765
PIL5	HFR1	616174	607982	3702.AT2G20180.2	3702.AT1G02340.1	0	0	0	0.653	0	0.765	0	0	0.765
SPA1	PHYB	618970	616034	3702.AT2G46340.1	3702.AT2G18790.1	0	0	0	0	0	0.765	0	0	0.765
SPA1	HFR1	618970	607982	3702.AT2G46340.1	3702.AT1G02340.1	0	0	0	0	0	0.765	0	0	0.765
SCL13	PHYB	626244	616034	3702.AT4G17230.1	3702.AT2G18790.1	0	0	0	0	0	0.765	0	0	0.765
HSP81-3	RPP4	633796	626209	3702.AT5G56010.1	3702.AT4G16860.1	0	0	0	0	0	0.765	0	0	0.765
ROF2	ROF1	632985	621811	3702.AT5G48570.1	3702.AT3G25230.2	0	0	0	0.977	0	0.765	0	0	0.765
PHYB	ARR4	616034	608850	3702.AT2G18790.1	3702.AT1G10470.1	0	0	0	0	0	0.765	0	0	0.765
SPX1	T5F17.60	630675	627487	3702.AT5G20150.1	3702.AT4G28610.1	0	0	0	0	0	0.765	0	0	0.765
PHYB	CRY2	616034	608194	3702.AT2G18790.1	3702.AT1G04400.1	0	0	0	0	0	0.765	0	0	0.765
DREB2A	PFT1	629195	610405	3702.AT5G05410.1	3702.AT1G25540.1	0	0	0	0	0	0.765	0	0	0.765
GPA1	GCR1	616824	611694	3702.AT2G26300.1	3702.AT1G48270.1	0	0	0	0	0	0.765	0	0	0.765
AT4G25730	REBELOTE	627171	623753	3702.AT4G25730.1	3702.AT3G55510.1	0	0	0	0	0	0.765	0	0	0.765
HY5	PHYB	629775	616034	3702.AT5G11260.1	3702.AT2G18790.1	0	0	0	0	0	0.765	0	0	0.765
PP7	HRB1	634627	633059	3702.AT5G63870.2	3702.AT5G49230.1	0	0	0	0	0	0.765	0	0	0.765
PHYB	PHYA	616034	608751	3702.AT2G18790.1	3702.AT1G09570.1	0	0	0	0.949	0	0.765	0	0	0.765
HSP81-2	BES1	633798	609787	3702.AT5G56030.2	3702.AT1G19350.3	0	0	0	0	0	0.765	0	0	0.765
CRY1	PHYA	625306	608751	3702.AT4G08920.1	3702.AT1G09570.1	0	0	0	0	0	0.765	0	0	0.765
HSP90.1	BES1	633425	609787	3702.AT5G52640.1	3702.AT1G19350.3	0	0	0	0	0	0.765	0	0	0.765
PHYB	PAPP2C	616034	610096	3702.AT2G18790.1	3702.AT1G22280.3	0	0	0	0	0	0.765	0	0	0.765
AT4G26600	AT3G15460	627267	620738	3702.AT4G26600.1	3702.AT3G15460.1	0	0	0	0	0	0.763	0	0	0.763
OLI2	AT1G52930	633787	612167	3702.AT5G55920.1	3702.AT1G52930.1	0	0	0	0	0	0.763	0	0	0.763
OLI2	AT3G15460	633787	620738	3702.AT5G55920.1	3702.AT3G15460.1	0	0	0	0	0	0.763	0	0	0.763
AT4G26600	AT1G52930	627267	612167	3702.AT4G26600.1	3702.AT1G52930.1	0	0	0	0	0	0.763	0	0	0.763
TOZ	NAP57	630307	623927	3702.AT5G16750.1	3702.AT3G57150.1	0	0	0	0	0	0.763	0	0	0.763
MARD1	MPK3	624562	622703	3702.AT3G63210.1	3702.AT3G45640.1	0	0	0	0	0	0.762	0	0	0.762
AO	MARD1	630099	624562	3702.AT5G14760.1	3702.AT3G63210.1	0	0	0	0	0	0.762	0	0	0.762
TCP11	PYE	629502	622906	3702.AT5G08330.1	3702.AT3G47640.2	0	0	0	0	0	0.762	0	0	0.762
MEE49	PUM24	624780	620884	3702.AT4G01560.1	3702.AT3G16810.1	0	0	0	0	0	0.762	0	0	0.762
HSP23.6	AT1G52560	627110	612126	3702.AT4G25200.1	3702.AT1G52560.1	0	0	0	0.733	0	0.762	0	0	0.762
RPC14	AT1G75510	617158	614358	3702.AT2G29540.3	3702.AT1G75510.1	0	0	0	0	0	0.761	0	0	0.761
REBELOTE	AT3G11964	623753	620332	3702.AT3G55510.1	3702.AT3G11964.1	0	0	0	0	0	0.76	0	0	0.76
AT4G26600	AT4G16630	627267	626179	3702.AT4G26600.1	3702.AT4G16630.1	0	0	0	0	0	0.76	0	0	0.76
OLI2	AT4G16630	633787	626179	3702.AT5G55920.1	3702.AT4G16630.1	0	0	0	0	0	0.76	0	0	0.76
RPL3B	PWP2	612904	609393	3702.AT1G61580.1	3702.AT1G15440.1	0	0	0	0	0	0.76	0	0	0.76
AT3G58660	AT1G79150	624079	614735	3702.AT3G58660.1	3702.AT1G79150.1	0	0	0	0	0	0.759	0	0	0.759
MEE49	AT2G18900	624780	616045	3702.AT4G01560.1	3702.AT2G18900.1	0	0	0	0	0	0.757	0	0	0.757
CPR	AT1G50920	623360	611953	3702.AT3G51800.2	3702.AT1G50920.1	0	0	0	0	0	0.757	0	0	0.757
AT3G18600	AT2G40360	621083	618335	3702.AT3G18600.1	3702.AT2G40360.1	0	0	0	0	0	0.755	0	0	0.755
PDE340	AT2G40360	629536	618335	3702.AT5G08610.1	3702.AT2G40360.1	0	0	0	0	0	0.755	0	0	0.755
AT3G15460	RPL3B	620738	612904	3702.AT3G15460.1	3702.AT1G61580.1	0	0	0	0	0	0.755	0	0	0.755
STRS2	AT2G40360	629537	618335	3702.AT5G08620.1	3702.AT2G40360.1	0	0	0	0	0	0.755	0	0	0.755
OLI2	AT3G58660	633787	624079	3702.AT5G55920.1	3702.AT3G58660.1	0	0	0	0	0	0.755	0	0	0.755
AT4G26600	AT3G58660	627267	624079	3702.AT4G26600.1	3702.AT3G58660.1	0	0	0	0	0	0.755	0	0	0.755
RPL3B	AT1G52930	612904	612167	3702.AT1G61580.1	3702.AT1G52930.1	0	0	0	0	0	0.755	0	0	0.755
AT3G58660	CPR	624079	623360	3702.AT3G58660.1	3702.AT3G51800.2	0	0	0	0	0	0.754	0	0	0.754
MPK3	NIA1	622703	614589	3702.AT3G45640.1	3702.AT1G77760.1	0	0	0	0	0	0.753	0	0	0.753
ZTL	PHYB	633942	616034	3702.AT5G57360.2	3702.AT2G18790.1	0	0	0	0	0	0.753	0	0	0.753
MPK3	NIA2	622703	611395	3702.AT3G45640.1	3702.AT1G37130.1	0	0	0	0	0	0.753	0	0	0.753
WRKY18	PIF3	627832	608747	3702.AT4G31800.1	3702.AT1G09530.2	0	0	0	0	0	0.752	0	0	0.752
PIF4	WRKY40	618619	614902	3702.AT2G43010.1	3702.AT1G80840.1	0	0	0	0	0	0.752	0	0	0.752
PIF4	PAR1	618619	618603	3702.AT2G43010.1	3702.AT2G42870.1	0	0	0	0	0	0.752	0	0	0.752
PHYB	PAP3	616034	609314	3702.AT2G18790.1	3702.AT1G14700.1	0	0	0	0	0	0.752	0	0	0.752
PHOT1	PKS1	622718	615110	3702.AT3G45780.2	3702.AT2G02950.1	0	0	0	0	0	0.752	0	0	0.752
HY5	PIF3	629775	608747	3702.AT5G11260.1	3702.AT1G09530.2	0	0	0	0	0	0.752	0	0	0.752
RAV2	GI	613678	610142	3702.AT1G68840.2	3702.AT1G22770.1	0	0	0	0	0	0.752	0	0	0.752
HY5	PIL5	629775	616174	3702.AT5G11260.1	3702.AT2G20180.2	0	0	0	0	0	0.752	0	0	0.752
WRKY18	PIF4	627832	618619	3702.AT4G31800.1	3702.AT2G43010.1	0	0	0	0	0	0.752	0	0	0.752
PIF7	PHYB	634356	616034	3702.AT5G61270.1	3702.AT2G18790.1	0	0	0	0	0	0.752	0	0	0.752
AT5G23280	TCP11	630930	629502	3702.AT5G23280.1	3702.AT5G08330.1	0	0	0	0.955	0	0.752	0	0	0.752
BIR1	SERK4	632961	615601	3702.AT5G48380.1	3702.AT2G13790.1	0	0	0	0.784	0	0.752	0	0	0.752
SPA1	PIL5	618970	616174	3702.AT2G46340.1	3702.AT2G20180.2	0	0	0	0	0	0.752	0	0	0.752
HY5	FCAALL.134	629775	625991	3702.AT5G11260.1	3702.AT4G15090.1	0	0	0	0	0	0.752	0	0	0.752
ZTL	ROC1	633942	628579	3702.AT5G57360.2	3702.AT4G38740.1	0	0	0	0	0	0.752	0	0	0.752
NPH4	MYB77	630735	623170	3702.AT5G20730.1	3702.AT3G50060.1	0	0	0	0	0	0.752	0	0	0.752
PRMT11	PRMT1A	627583	616123	3702.AT4G29510.1	3702.AT2G19670.1	0	0	0	0.981	0	0.752	0	0	0.752
WRKY40	PIF3	614902	608747	3702.AT1G80840.1	3702.AT1G09530.2	0	0	0	0	0	0.752	0	0	0.752
PAP3	PHYA	609314	608751	3702.AT1G14700.1	3702.AT1G09570.1	0	0	0	0	0	0.752	0	0	0.752
PIF7	PIF4	634356	618619	3702.AT5G61270.1	3702.AT2G43010.1	0	0	0	0.629	0	0.752	0	0	0.752
PHYD	PHYB	626135	616034	3702.AT4G16250.1	3702.AT2G18790.1	0	0	0	0.981	0	0.752	0	0	0.752
NPH3	PKS1	634675	615110	3702.AT5G64330.1	3702.AT2G02950.1	0	0	0	0	0	0.752	0	0	0.752
CIB5	CRY2	610429	608194	3702.AT1G26260.1	3702.AT1G04400.1	0	0	0	0	0	0.752	0	0	0.752
AT5G48560	CIB1	632984	628135	3702.AT5G48560.1	3702.AT4G34530.1	0	0	0	0.785	0	0.752	0	0	0.752
NPH3	PHOT1	634675	622718	3702.AT5G64330.1	3702.AT3G45780.2	0	0	0	0	0	0.752	0	0	0.752
SPA1	PHYA	618970	608751	3702.AT2G46340.1	3702.AT1G09570.1	0	0	0	0	0	0.752	0	0	0.752
CIB1	CIB5	628135	610429	3702.AT4G34530.1	3702.AT1G26260.1	0	0	0	0.79	0	0.752	0	0	0.752
PIF7	PIF3	634356	608747	3702.AT5G61270.1	3702.AT1G09530.2	0	0	0	0.642	0	0.752	0	0	0.752
LHCB2.3	LHCB4.2	622087	620000	3702.AT3G27690.1	3702.AT3G08940.2	0	0	0	0.723	0	0.481	0.54	0	0.751
LHCB4.2	LHCB2.1	620000	615304	3702.AT3G08940.2	3702.AT2G05100.1	0	0	0	0.73	0	0.481	0.54	0	0.751
LHCB4.2	LHCB2.2	620000	615303	3702.AT3G08940.2	3702.AT2G05070.1	0	0	0	0.729	0	0.481	0.54	0	0.751
PUM24	AT1G50920	620884	611953	3702.AT3G16810.1	3702.AT1G50920.1	0	0	0	0	0	0.751	0	0	0.751
LHCB4.2	CAB3	620000	610795	3702.AT3G08940.2	3702.AT1G29910.1	0	0	0	0.773	0	0.481	0.54	0	0.751
HSP90.1	ROF1	633425	621811	3702.AT5G52640.1	3702.AT3G25230.2	0	0	0	0	0	0.75	0	0	0.75
EDA7	NOP56	623909	612513	3702.AT3G56990.1	3702.AT1G56110.1	0	0	0	0	0	0.749	0	0	0.749
AT4G15770	RPL3B	626072	612904	3702.AT4G15770.1	3702.AT1G61580.1	0	0	0	0	0	0.749	0	0	0.749
AT4G25730	AT4G15770	627171	626072	3702.AT4G25730.1	3702.AT4G15770.1	0	0	0	0	0	0.749	0	0	0.749
NSN1	AT1G23280	619849	610202	3702.AT3G07050.1	3702.AT1G23280.1	0	0	0	0	0	0.749	0	0	0.749
AT1G79150	RPL3B	614735	612904	3702.AT1G79150.1	3702.AT1G61580.1	0	0	0	0	0	0.749	0	0	0.749
MEE49	RPL3B	624780	612904	3702.AT4G01560.1	3702.AT1G61580.1	0	0	0	0	0	0.749	0	0	0.749
EDA7	AT2G18900	623909	616045	3702.AT3G56990.1	3702.AT2G18900.1	0	0	0	0	0	0.749	0	0	0.749
AT5G15550	RPL3B	630178	612904	3702.AT5G15550.1	3702.AT1G61580.1	0	0	0	0	0	0.749	0	0	0.749
AT5G08600	AT1G31660	629535	610973	3702.AT5G08600.2	3702.AT1G31660.1	0	0	0	0	0	0.749	0	0	0.749
HSP90.1	AT3G12050	633425	620341	3702.AT5G52640.1	3702.AT3G12050.1	0	0	0	0	0	0.748	0	0	0.748
HSP81-2	AT3G12050	633798	620341	3702.AT5G56030.2	3702.AT3G12050.1	0	0	0	0	0	0.748	0	0	0.748
HSP81-3	AT3G12050	633796	620341	3702.AT5G56010.1	3702.AT3G12050.1	0	0	0	0	0	0.748	0	0	0.748
AT3G12050	CR88	620341	615213	3702.AT3G12050.1	3702.AT2G04030.1	0	0	0	0	0	0.748	0	0	0.748
MEE49	AT1G31660	624780	610973	3702.AT4G01560.1	3702.AT1G31660.1	0	0	0	0	0	0.746	0	0	0.746
MEE49	AT1G63810	624780	613137	3702.AT4G01560.1	3702.AT1G63810.1	0	0	0	0	0	0.746	0	0	0.746
LHCA4	CAB3	622888	610795	3702.AT3G47470.1	3702.AT1G29910.1	0	0	0	0.776	0	0.47	0.54	0	0.745
REBELOTE	AT2G40360	623753	618335	3702.AT3G55510.1	3702.AT2G40360.1	0	0	0	0	0	0.744	0	0	0.744
AT4G15770	AT1G50920	626072	611953	3702.AT4G15770.1	3702.AT1G50920.1	0	0	0	0	0	0.744	0	0	0.744
AT4G25730	AT1G50920	627171	611953	3702.AT4G25730.1	3702.AT1G50920.1	0	0	0	0	0	0.744	0	0	0.744
AT5G27120	NSN1	631316	619849	3702.AT5G27120.1	3702.AT3G07050.1	0	0	0	0	0	0.743	0	0	0.743
NSN1	AT3G05060	619849	619621	3702.AT3G07050.1	3702.AT3G05060.1	0	0	0	0	0	0.743	0	0	0.743
NSN1	RPL3B	619849	612904	3702.AT3G07050.1	3702.AT1G61580.1	0	0	0	0	0	0.741	0	0	0.741
ACD6	HSP70	625904	620395	3702.AT4G14400.1	3702.AT3G12580.1	0	0	0	0	0	0.74	0	0	0.74
AT1G52930	AT1G50920	612167	611953	3702.AT1G52930.1	3702.AT1G50920.1	0	0	0	0	0	0.739	0	0	0.739
AT3G15460	AT1G50920	620738	611953	3702.AT3G15460.1	3702.AT1G50920.1	0	0	0	0	0	0.739	0	0	0.739
LHCB2.2	PSAD-2	615303	608069	3702.AT2G05070.1	3702.AT1G03130.1	0	0	0	0	0	0.603	0.36	0	0.735
LHCB2.3	PSAD-2	622087	608069	3702.AT3G27690.1	3702.AT1G03130.1	0	0	0	0	0	0.603	0.36	0	0.735
AT3G57490	RACK1C_AT	623961	621027	3702.AT3G57490.1	3702.AT3G18130.1	0	0	0	0	0	0.735	0	0	0.735
LHCB2.1	PSAD-2	615304	608069	3702.AT2G05100.1	3702.AT1G03130.1	0	0	0	0	0	0.603	0.36	0	0.735
ROF1	HSFA2	621811	616809	3702.AT3G25230.2	3702.AT2G26150.1	0	0	0	0	0	0.734	0	0	0.734
REBELOTE	AT1G50920	623753	611953	3702.AT3G55510.1	3702.AT1G50920.1	0	0	0	0	0	0.734	0	0	0.734
AT4G13170	AT2G37990	625749	618078	3702.AT4G13170.1	3702.AT2G37990.1	0	0	0	0	0	0.733	0	0	0.733
AT3G18600	AT1G29320	621083	610735	3702.AT3G18600.1	3702.AT1G29320.1	0	0	0	0	0	0.733	0	0	0.733
STRS2	AT1G79150	629537	614735	3702.AT5G08620.1	3702.AT1G79150.1	0	0	0	0	0	0.733	0	0	0.733
OLI2	AT1G50920	633787	611953	3702.AT5G55920.1	3702.AT1G50920.1	0	0	0	0	0	0.733	0	0	0.733
STRS2	AT1G29320	629537	610735	3702.AT5G08620.1	3702.AT1G29320.1	0	0	0	0	0	0.733	0	0	0.733
AT5G27120	AT2G37990	631316	618078	3702.AT5G27120.1	3702.AT2G37990.1	0	0	0	0	0	0.733	0	0	0.733
PDE340	AT1G29320	629536	610735	3702.AT5G08610.1	3702.AT1G29320.1	0	0	0	0	0	0.733	0	0	0.733
PDE340	AT1G79150	629536	614735	3702.AT5G08610.1	3702.AT1G79150.1	0	0	0	0	0	0.733	0	0	0.733
AT4G26600	AT1G50920	627267	611953	3702.AT4G26600.1	3702.AT1G50920.1	0	0	0	0	0	0.733	0	0	0.733
AT3G18600	AT1G79150	621083	614735	3702.AT3G18600.1	3702.AT1G79150.1	0	0	0	0	0	0.733	0	0	0.733
AT3G05060	AT2G37990	619621	618078	3702.AT3G05060.1	3702.AT2G37990.1	0	0	0	0	0	0.733	0	0	0.733
AT5G27120	AT1G50920	631316	611953	3702.AT5G27120.1	3702.AT1G50920.1	0	0	0	0	0	0.732	0	0	0.732
AT3G15460	NSN1	620738	619849	3702.AT3G15460.1	3702.AT3G07050.1	0	0	0	0	0	0.732	0	0	0.732
AT4G26600	AT3G05060	627267	619621	3702.AT4G26600.1	3702.AT3G05060.1	0	0	0	0	0	0.732	0	0	0.732
AT3G05060	AT1G50920	619621	611953	3702.AT3G05060.1	3702.AT1G50920.1	0	0	0	0	0	0.732	0	0	0.732
AT5G08600	AT4G16630	629535	626179	3702.AT5G08600.2	3702.AT4G16630.1	0	0	0	0	0	0.732	0	0	0.732
AT3G05060	AT2G34357	619621	617686	3702.AT3G05060.1	3702.AT2G34357.1	0	0	0	0	0	0.732	0	0	0.732
AT5G27120	EDA25	631316	614042	3702.AT5G27120.1	3702.AT1G72440.1	0	0	0	0	0	0.732	0	0	0.732
AT5G54910	AT5G08600	633677	629535	3702.AT5G54910.1	3702.AT5G08600.2	0	0	0	0	0	0.732	0	0	0.732
NAP57	NSN1	623927	619849	3702.AT3G57150.1	3702.AT3G07050.1	0	0	0	0	0	0.732	0	0	0.732
OLI2	AT1G29320	633787	610735	3702.AT5G55920.1	3702.AT1G29320.1	0	0	0	0	0	0.732	0	0	0.732
AT4G26600	AT1G29320	627267	610735	3702.AT4G26600.1	3702.AT1G29320.1	0	0	0	0	0	0.732	0	0	0.732
HSP81-2	SGT1A	633798	626937	3702.AT5G56030.2	3702.AT4G23570.3	0	0	0	0	0	0.732	0	0	0.732
AT5G27120	AT2G34357	631316	617686	3702.AT5G27120.1	3702.AT2G34357.1	0	0	0	0	0	0.732	0	0	0.732
AT5G15550	AT3G05060	630178	619621	3702.AT5G15550.1	3702.AT3G05060.1	0	0	0	0	0	0.732	0	0	0.732
AT5G27120	AT4G26600	631316	627267	3702.AT5G27120.1	3702.AT4G26600.1	0	0	0	0	0	0.732	0	0	0.732
MEE49	AT3G05060	624780	619621	3702.AT4G01560.1	3702.AT3G05060.1	0	0	0	0	0	0.732	0	0	0.732
RH1	AT3G05060	626081	619621	3702.AT4G15850.1	3702.AT3G05060.1	0	0	0	0	0	0.732	0	0	0.732
AT5G27120	AT5G14520	631316	630075	3702.AT5G27120.1	3702.AT5G14520.1	0	0	0	0	0	0.732	0	0	0.732
NSN1	AT1G52930	619849	612167	3702.AT3G07050.1	3702.AT1G52930.1	0	0	0	0	0	0.732	0	0	0.732
OLI2	AT5G27120	633787	631316	3702.AT5G55920.1	3702.AT5G27120.1	0	0	0	0	0	0.732	0	0	0.732
AT3G05060	AT1G29320	619621	610735	3702.AT3G05060.1	3702.AT1G29320.1	0	0	0	0	0	0.732	0	0	0.732
AT5G27120	NRPA2	631316	610798	3702.AT5G27120.1	3702.AT1G29940.1	0	0	0	0	0	0.732	0	0	0.732
AT3G05060	NRPA2	619621	610798	3702.AT3G05060.1	3702.AT1G29940.1	0	0	0	0	0	0.732	0	0	0.732
AT3G05060	EDA25	619621	614042	3702.AT3G05060.1	3702.AT1G72440.1	0	0	0	0	0	0.732	0	0	0.732
AT5G27120	AT1G29320	631316	610735	3702.AT5G27120.1	3702.AT1G29320.1	0	0	0	0	0	0.732	0	0	0.732
OLI2	AT3G05060	633787	619621	3702.AT5G55920.1	3702.AT3G05060.1	0	0	0	0	0	0.732	0	0	0.732
AT2G40360	EDA25	618335	614042	3702.AT2G40360.1	3702.AT1G72440.1	0	0	0	0	0	0.732	0	0	0.732
AT5G14520	AT3G05060	630075	619621	3702.AT5G14520.1	3702.AT3G05060.1	0	0	0	0	0	0.732	0	0	0.732
AT5G27120	RH1	631316	626081	3702.AT5G27120.1	3702.AT4G15850.1	0	0	0	0	0	0.732	0	0	0.732
AT5G27120	AT5G15550	631316	630178	3702.AT5G27120.1	3702.AT5G15550.1	0	0	0	0	0	0.732	0	0	0.732
AT5G27120	MEE49	631316	624780	3702.AT5G27120.1	3702.AT4G01560.1	0	0	0	0	0	0.732	0	0	0.732
PDE340	AT4G15770	629536	626072	3702.AT5G08610.1	3702.AT4G15770.1	0	0	0	0	0	0.731	0	0	0.731
LHB1B1	LHCB2.1	617694	615304	3702.AT2G34430.1	3702.AT2G05100.1	0	0	0	0.974	0	0.731	0	0	0.731
LHB1B1	LHCB2.2	617694	615303	3702.AT2G34430.1	3702.AT2G05070.1	0	0	0	0.975	0	0.731	0	0	0.731
AT5G08600	MEE49	629535	624780	3702.AT5G08600.2	3702.AT4G01560.1	0	0	0	0	0	0.731	0	0	0.731
OLI2	REBELOTE	633787	623753	3702.AT5G55920.1	3702.AT3G55510.1	0	0	0	0	0	0.731	0	0	0.731
AT5G08600	PUM24	629535	620884	3702.AT5G08600.2	3702.AT3G16810.1	0	0	0	0	0	0.731	0	0	0.731
AT5G14520	AT3G18600	630075	621083	3702.AT5G14520.1	3702.AT3G18600.1	0	0	0	0	0	0.731	0	0	0.731
STRS2	AT4G15770	629537	626072	3702.AT5G08620.1	3702.AT4G15770.1	0	0	0	0	0	0.731	0	0	0.731
STRS2	MEE49	629537	624780	3702.AT5G08620.1	3702.AT4G01560.1	0	0	0	0	0	0.731	0	0	0.731
AT4G02930	RPL3P	624941	620955	3702.AT4G02930.1	3702.AT3G17465.1	0	0	0	0	0	0.731	0	0	0.731
AT5G14520	STRS2	630075	629537	3702.AT5G14520.1	3702.AT5G08620.1	0	0	0	0	0	0.731	0	0	0.731
MEE49	AT3G18600	624780	621083	3702.AT4G01560.1	3702.AT3G18600.1	0	0	0	0	0	0.731	0	0	0.731
AT4G16630	AT2G40360	626179	618335	3702.AT4G16630.1	3702.AT2G40360.1	0	0	0	0	0	0.731	0	0	0.731
PDE340	MEE49	629536	624780	3702.AT5G08610.1	3702.AT4G01560.1	0	0	0	0	0	0.731	0	0	0.731
AT5G14520	PDE340	630075	629536	3702.AT5G14520.1	3702.AT5G08610.1	0	0	0	0	0	0.731	0	0	0.731
REBELOTE	AT1G79150	623753	614735	3702.AT3G55510.1	3702.AT1G79150.1	0	0	0	0	0	0.731	0	0	0.731
AT4G02930	RPL3B	624941	612904	3702.AT4G02930.1	3702.AT1G61580.1	0	0	0	0	0	0.731	0	0	0.731
RACK1C_AT	NUDT21	621027	614153	3702.AT3G18130.1	3702.AT1G73540.1	0	0	0	0	0	0.731	0	0	0.731
LHCB2.3	LHB1B1	622087	617694	3702.AT3G27690.1	3702.AT2G34430.1	0	0	0	0.974	0	0.731	0	0	0.731
AT5G15550	EDA25	630178	614042	3702.AT5G15550.1	3702.AT1G72440.1	0	0	0	0	0	0.731	0	0	0.731
AT4G26600	REBELOTE	627267	623753	3702.AT4G26600.1	3702.AT3G55510.1	0	0	0	0	0	0.731	0	0	0.731
AT4G15770	AT3G18600	626072	621083	3702.AT4G15770.1	3702.AT3G18600.1	0	0	0	0	0	0.731	0	0	0.731
AT2G37990	NOP56	618078	612513	3702.AT2G37990.1	3702.AT1G56110.1	0	0	0	0	0	0.731	0	0	0.731
AT5G66540	NAP57	634922	623927	3702.AT5G66540.1	3702.AT3G57150.1	0	0	0	0	0	0.731	0	0	0.731
RACK1C_AT	NUDT4	621027	609680	3702.AT3G18130.1	3702.AT1G18300.1	0	0	0	0	0	0.731	0	0	0.731
AT3G58660	AT2G40360	624079	618335	3702.AT3G58660.1	3702.AT2G40360.1	0	0	0	0	0	0.73	0	0	0.73
AT3G58660	AT3G11964	624079	620332	3702.AT3G58660.1	3702.AT3G11964.1	0	0	0	0	0	0.73	0	0	0.73
AT5G15750	AT4G02930	630199	624941	3702.AT5G15750.1	3702.AT4G02930.1	0	0	0	0	0	0.73	0	0	0.73
AT4G15770	AT3G58660	626072	624079	3702.AT4G15770.1	3702.AT3G58660.1	0	0	0	0	0	0.73	0	0	0.73
AT5G66540	AT1G50920	634922	611953	3702.AT5G66540.1	3702.AT1G50920.1	0	0	0	0	0	0.73	0	0	0.73
AT4G27130	AT3G57490	627322	623961	3702.AT4G27130.1	3702.AT3G57490.1	0	0	0	0	0	0.73	0	0	0.73
AT3G58660	AT1G25260	624079	610373	3702.AT3G58660.1	3702.AT1G25260.1	0	0	0	0	0	0.73	0	0	0.73
AT5G08600	EDA7	629535	623909	3702.AT5G08600.2	3702.AT3G56990.1	0	0	0	0	0	0.73	0	0	0.73
AT5G54940	AT3G57490	633680	623961	3702.AT5G54940.1	3702.AT3G57490.1	0	0	0	0	0	0.73	0	0	0.73
AT3G58660	AT1G29320	624079	610735	3702.AT3G58660.1	3702.AT1G29320.1	0	0	0	0	0	0.73	0	0	0.73
TOZ	AT1G50920	630307	611953	3702.AT5G16750.1	3702.AT1G50920.1	0	0	0	0	0	0.729	0	0	0.729
BIP2	Fes1A	632249	620046	3702.AT5G42020.1	3702.AT3G09350.1	0	0	0	0	0	0.728	0	0	0.728
AT3G18600	PWP2	621083	609393	3702.AT3G18600.1	3702.AT1G15440.1	0	0	0	0	0	0.724	0	0	0.724
STRS2	PWP2	629537	609393	3702.AT5G08620.1	3702.AT1G15440.1	0	0	0	0	0	0.724	0	0	0.724
PDE340	PWP2	629536	609393	3702.AT5G08610.1	3702.AT1G15440.1	0	0	0	0	0	0.724	0	0	0.724
RUP1	AT5G15550	633383	630178	3702.AT5G52250.1	3702.AT5G15550.1	0	0	0	0	0	0	0.72	0	0.72
MAX2	AT1G80440	618579	614860	3702.AT2G42620.1	3702.AT1G80440.1	0	0	0	0	0	0	0.72	0	0.72
AT5G15550	SPA4	630178	612185	3702.AT5G15550.1	3702.AT1G53090.2	0	0	0	0	0	0	0.72	0	0.72
SGT1A	AT1G80440	626937	614860	3702.AT4G23570.3	3702.AT1G80440.1	0	0	0	0	0	0	0.72	0	0.72
SPA1	PWP2	618970	609393	3702.AT2G46340.1	3702.AT1G15440.1	0	0	0	0	0	0	0.72	0	0.72
RUP1	PWP2	633383	609393	3702.AT5G52250.1	3702.AT1G15440.1	0	0	0	0	0	0	0.72	0	0.72
AT5G15550	PWP2	630178	609393	3702.AT5G15550.1	3702.AT1G15440.1	0	0	0	0	0	0	0.72	0	0.72
SGT1A	MAX2	626937	618579	3702.AT4G23570.3	3702.AT2G42620.1	0	0	0	0	0	0	0.72	0	0.72
AT5G15550	SPA1	630178	618970	3702.AT5G15550.1	3702.AT2G46340.1	0	0	0	0	0	0	0.72	0	0.72
RUP1	SPA4	633383	612185	3702.AT5G52250.1	3702.AT1G53090.2	0	0	0	0.8	0	0	0.72	0	0.72
SPA4	PWP2	612185	609393	3702.AT1G53090.2	3702.AT1G15440.1	0	0	0	0	0	0	0.72	0	0.72
FLN2	PRIN2	613713	608856	3702.AT1G69200.1	3702.AT1G10522.2	0	0	0	0	0	0	0.72	0	0.72
AT1G75510	ATRPAC42	614358	612815	3702.AT1G75510.1	3702.AT1G60850.1	0	0	0	0	0	0.719	0	0	0.719
AT4G04940	NAP57	625105	623927	3702.AT4G04940.1	3702.AT3G57150.1	0	0	0	0	0	0.716	0	0	0.716
CNI1	SYP121	631345	620315	3702.AT5G27420.1	3702.AT3G11820.1	0	0	0	0	0	0.715	0	0	0.715
WRKY30	WRKY70	631018	623849	3702.AT5G24110.1	3702.AT3G56400.1	0	0	0	0.679	0	0.715	0	0	0.715
PIL5	PHYB	616174	616034	3702.AT2G20180.2	3702.AT2G18790.1	0	0	0	0	0	0.715	0	0	0.715
PIL5	PHYA	616174	608751	3702.AT2G20180.2	3702.AT1G09570.1	0	0	0	0	0	0.715	0	0	0.715
PTAC5	FLN2	625808	613713	3702.AT4G13670.1	3702.AT1G69200.1	0	0	0	0	0	0.715	0	0	0.715
HY5	PAT3	629775	618046	3702.AT5G11260.1	3702.AT2G37678.1	0	0	0	0	0	0.715	0	0	0.715
AT5G66540	PDE340	634922	629536	3702.AT5G66540.1	3702.AT5G08610.1	0	0	0	0	0	0.715	0	0	0.715
PIF4	PAP3	618619	609314	3702.AT2G43010.1	3702.AT1G14700.1	0	0	0	0	0	0.715	0	0	0.715
PIF4	BES1	618619	609787	3702.AT2G43010.1	3702.AT1G19350.3	0	0	0	0	0	0.715	0	0	0.715
AT5G08180	AT3G05060	629485	619621	3702.AT5G08180.2	3702.AT3G05060.1	0	0	0	0	0	0.406	0.54	0	0.715
AT5G66540	STRS2	634922	629537	3702.AT5G66540.1	3702.AT5G08620.1	0	0	0	0	0	0.715	0	0	0.715
WRKY30	WRKY53	631018	626961	3702.AT5G24110.1	3702.AT4G23810.1	0	0	0	0.781	0	0.715	0	0	0.715
WRKY18	WRKY40	627832	614902	3702.AT4G31800.1	3702.AT1G80840.1	0	0	0	0.892	0	0.715	0	0	0.715
NAP57	AT3G11964	623927	620332	3702.AT3G57150.1	3702.AT3G11964.1	0	0	0	0	0	0.715	0	0	0.715
CRY1	PHYB	625306	616034	3702.AT4G08920.1	3702.AT2G18790.1	0	0	0	0	0	0.715	0	0	0.715
PAP3	PIF3	609314	608747	3702.AT1G14700.1	3702.AT1G09530.2	0	0	0	0	0	0.715	0	0	0.715
SNRK2.2	RAV1	623216	609156	3702.AT3G50500.2	3702.AT1G13260.1	0	0	0	0	0	0.715	0	0	0.715
CNI1	SYP122	631345	623425	3702.AT5G27420.1	3702.AT3G52400.1	0	0	0	0	0	0.715	0	0	0.715
AT5G27120	AT5G08180	631316	629485	3702.AT5G27120.1	3702.AT5G08180.2	0	0	0	0	0	0.406	0.54	0	0.715
FHL	PHYA	628856	608751	3702.AT5G02200.2	3702.AT1G09570.1	0	0	0	0	0	0.715	0	0	0.715
AT5G66540	AT3G18600	634922	621083	3702.AT5G66540.1	3702.AT3G18600.1	0	0	0	0	0	0.715	0	0	0.715
GI	LHY	610142	607846	3702.AT1G22770.1	3702.AT1G01060.2	0	0	0	0	0	0.715	0	0	0.715
PAT3	PIF3	618046	608747	3702.AT2G37678.1	3702.AT1G09530.2	0	0	0	0	0	0.715	0	0	0.715
HSP21	PTAC5	627381	625808	3702.AT4G27670.1	3702.AT4G13670.1	0	0	0	0	0	0.715	0	0	0.715
AT4G26600	AT2G37990	627267	618078	3702.AT4G26600.1	3702.AT2G37990.1	0	0	0	0	0	0.713	0	0	0.713
OLI2	AT2G37990	633787	618078	3702.AT5G55920.1	3702.AT2G37990.1	0	0	0	0	0	0.713	0	0	0.713
AT5G15550	AT4G16630	630178	626179	3702.AT5G15550.1	3702.AT4G16630.1	0	0	0	0	0	0.712	0	0	0.712
AT4G02930	AT2G42710	624941	618587	3702.AT4G02930.1	3702.AT2G42710.1	0	0	0	0	0	0.711	0	0	0.711
NAP57	AT1G50920	623927	611953	3702.AT3G57150.1	3702.AT1G50920.1	0	0	0	0	0	0.711	0	0	0.711
RPL3B	AT1G50920	612904	611953	3702.AT1G61580.1	3702.AT1G50920.1	0	0	0	0	0	0.708	0	0	0.708
AT3G58660	AT1G31660	624079	610973	3702.AT3G58660.1	3702.AT1G31660.1	0	0	0	0	0	0.704	0	0	0.704
AT5G15550	AT3G18600	630178	621083	3702.AT5G15550.1	3702.AT3G18600.1	0	0	0	0	0	0.703	0	0	0.703
AT5G27395	RPL3P	631342	620955	3702.AT5G27395.1	3702.AT3G17465.1	0	0	0	0	0	0.703	0	0	0.703
AT5G15550	PDE340	630178	629536	3702.AT5G15550.1	3702.AT5G08610.1	0	0	0	0	0	0.703	0	0	0.703
AT5G15550	STRS2	630178	629537	3702.AT5G15550.1	3702.AT5G08620.1	0	0	0	0	0	0.703	0	0	0.703
AT4G25730	RPL3B	627171	612904	3702.AT4G25730.1	3702.AT1G61580.1	0	0	0	0	0	0.703	0	0	0.703
RACK1C_AT	RPL3P	621027	620955	3702.AT3G18130.1	3702.AT3G17465.1	0	0	0	0	0	0.702	0	0	0.702
AT5G15750	RACK1C_AT	630199	621027	3702.AT5G15750.1	3702.AT3G18130.1	0	0	0	0	0	0.702	0	0	0.702
AT4G13170	CPR	625749	623360	3702.AT4G13170.1	3702.AT3G51800.2	0	0	0	0	0	0.701	0	0	0.701
AT5G54910	AT1G31660	633677	610973	3702.AT5G54910.1	3702.AT1G31660.1	0	0	0	0	0	0.7	0	0	0.7
AT5G14520	AT5G08600	630075	629535	3702.AT5G14520.1	3702.AT5G08600.2	0	0	0	0	0	0.699	0	0	0.699
AT4G13170	AT4G02930	625749	624941	3702.AT4G13170.1	3702.AT4G02930.1	0	0	0	0	0	0.698	0	0	0.698
AT1G75510	NRPA2	614358	610798	3702.AT1G75510.1	3702.AT1G29940.1	0	0	0	0	0	0.698	0	0	0.698
Hop3	CR88	625668	615213	3702.AT4G12400.2	3702.AT2G04030.1	0	0	0	0	0	0.697	0	0	0.697
HSP81-2	Hop3	633798	625668	3702.AT5G56030.2	3702.AT4G12400.2	0	0	0	0	0	0.697	0	0	0.697
AT5G14520	NAP57	630075	623927	3702.AT5G14520.1	3702.AT3G57150.1	0	0	0	0	0	0.696	0	0	0.696
AT2G30600	UBC28	617270	613183	3702.AT2G30600.5	3702.AT1G64230.5	0	0	0	0	0	0.696	0	0	0.696
AT5G66540	AT5G08180	634922	629485	3702.AT5G66540.1	3702.AT5G08180.2	0	0	0	0	0	0.696	0	0	0.696
AT4G13170	AT1G25260	625749	610373	3702.AT4G13170.1	3702.AT1G25260.1	0	0	0	0	0	0.695	0	0	0.695
AT3G58660	AT2G34357	624079	617686	3702.AT3G58660.1	3702.AT2G34357.1	0	0	0	0	0	0.695	0	0	0.695
MTHSC70-2	AR192	629597	627286	3702.AT5G09590.1	3702.AT4G26780.1	0	0	0	0	0	0.694	0	0	0.694
mtHsc70-1	AR192	628494	627286	3702.AT4G37910.1	3702.AT4G26780.1	0	0	0	0	0	0.694	0	0	0.694
NAP57	ATRPAC42	623927	612815	3702.AT3G57150.1	3702.AT1G60850.1	0	0	0	0	0	0.694	0	0	0.694
AR192	cpHsc70-1	627286	627017	3702.AT4G26780.1	3702.AT4G24280.1	0	0	0	0	0	0.694	0	0	0.694
cpHsc70-2	AR192	633130	627286	3702.AT5G49910.1	3702.AT4G26780.1	0	0	0	0	0	0.694	0	0	0.694
Fes1A	Hsp70b	620046	609455	3702.AT3G09350.1	3702.AT1G16030.1	0	0	0	0	0	0.693	0	0	0.693
MPK3	STZ	622703	610593	3702.AT3G45640.1	3702.AT1G27730.1	0	0	0	0	0	0.693	0	0	0.693
Fes1A	HSP70T-2	620046	617441	3702.AT3G09350.1	3702.AT2G32120.1	0	0	0	0	0	0.693	0	0	0.693
HSP70	Fes1A	620395	620046	3702.AT3G12580.1	3702.AT3G09350.1	0	0	0	0	0	0.693	0	0	0.693
AT3G09440	Fes1A	620055	620046	3702.AT3G09440.1	3702.AT3G09350.1	0	0	0	0	0	0.693	0	0	0.693
Hsp70-2	Fes1A	628884	620046	3702.AT5G02490.1	3702.AT3G09350.1	0	0	0	0	0	0.693	0	0	0.693
AT5G08600	AT4G25730	629535	627171	3702.AT5G08600.2	3702.AT4G25730.1	0	0	0	0	0	0.692	0	0	0.692
AT4G02930	AT3G11964	624941	620332	3702.AT4G02930.1	3702.AT3G11964.1	0	0	0	0	0	0.69	0	0	0.69
PDE340	AT3G05060	629536	619621	3702.AT5G08610.1	3702.AT3G05060.1	0	0	0	0	0	0.689	0	0	0.689
AT3G18600	AT3G05060	621083	619621	3702.AT3G18600.1	3702.AT3G05060.1	0	0	0	0	0	0.689	0	0	0.689
AT5G27120	PDE340	631316	629536	3702.AT5G27120.1	3702.AT5G08610.1	0	0	0	0	0	0.689	0	0	0.689
AT5G27120	STRS2	631316	629537	3702.AT5G27120.1	3702.AT5G08620.1	0	0	0	0	0	0.689	0	0	0.689
STRS2	AT3G05060	629537	619621	3702.AT5G08620.1	3702.AT3G05060.1	0	0	0	0	0	0.689	0	0	0.689
AT5G27120	AT3G18600	631316	621083	3702.AT5G27120.1	3702.AT3G18600.1	0	0	0	0	0	0.689	0	0	0.689
BIP2	ATERDJ3B	632249	624497	3702.AT5G42020.1	3702.AT3G62600.1	0	0	0	0	0	0.688	0	0	0.688
AT2G34357	AT1G31660	617686	610973	3702.AT2G34357.1	3702.AT1G31660.1	0	0	0	0	0	0.684	0	0	0.684
At3g03780	MAT3	619478	617957	3702.AT3G03780.1	3702.AT2G36880.2	0	0	0	0	0	0.132	0.65	0	0.683
AT4G13170	MEE49	625749	624780	3702.AT4G13170.1	3702.AT4G01560.1	0	0	0	0	0	0.681	0	0	0.681
AT4G13170	AT1G79150	625749	614735	3702.AT4G13170.1	3702.AT1G79150.1	0	0	0	0	0	0.681	0	0	0.681
AT5G15550	AT4G13170	630178	625749	3702.AT5G15550.1	3702.AT4G13170.1	0	0	0	0	0	0.681	0	0	0.681
AT5G14520	AT4G13170	630075	625749	3702.AT5G14520.1	3702.AT4G13170.1	0	0	0	0	0	0.681	0	0	0.681
AT4G13170	AT1G29320	625749	610735	3702.AT4G13170.1	3702.AT1G29320.1	0	0	0	0	0	0.681	0	0	0.681
MYBR1	MPK3	635007	622703	3702.AT5G67300.1	3702.AT3G45640.1	0	0	0	0	0	0.68	0	0	0.68
HSFA4A	MPK3	626431	622703	3702.AT4G18880.1	3702.AT3G45640.1	0	0	0	0	0	0.679	0	0	0.679
RACK1C_AT	AT2G42710	621027	618587	3702.AT3G18130.1	3702.AT2G42710.1	0	0	0	0	0	0.679	0	0	0.679
AT5G14580	ATRPAC42	630081	612815	3702.AT5G14580.1	3702.AT1G60850.1	0	0	0	0	0	0.078	0.65	0	0.663
AT5G54910	PUM24	633677	620884	3702.AT5G54910.1	3702.AT3G16810.1	0	0	0	0	0	0.663	0	0	0.663
BCAT3	DIN4	623127	620504	3702.AT3G49680.1	3702.AT3G13450.1	0	0	0	0	0	0.065	0.65	0	0.658
MYBR1	MKK4	635007	612032	3702.AT5G67300.1	3702.AT1G51660.1	0	0	0	0	0	0.656	0	0	0.656
AT3G09440	CR88	620055	615213	3702.AT3G09440.1	3702.AT2G04030.1	0	0	0	0	0	0.655	0	0	0.655
ERF6	MPK3	626270	622703	3702.AT4G17490.1	3702.AT3G45640.1	0	0	0	0	0	0.655	0	0	0.655
HSP81-2	Hsp70b	633798	609455	3702.AT5G56030.2	3702.AT1G16030.1	0	0	0	0	0	0.655	0	0	0.655
PIF4	HFR1	618619	607982	3702.AT2G43010.1	3702.AT1G02340.1	0	0	0	0.616	0	0.655	0	0	0.655
NPH3	CUL3	634675	610496	3702.AT5G64330.1	3702.AT1G26830.1	0	0	0	0	0	0.655	0	0	0.655
RFI2	GI	619116	610142	3702.AT2G47700.1	3702.AT1G22770.1	0	0	0	0	0	0.655	0	0	0.655
LAF1	HFR1	627151	607982	3702.AT4G25560.1	3702.AT1G02340.1	0	0	0	0	0	0.655	0	0	0.655
ZTL	CRY1	633942	625306	3702.AT5G57360.2	3702.AT4G08920.1	0	0	0	0	0	0.655	0	0	0.655
HSP81-2	Hsp70-2	633798	628884	3702.AT5G56030.2	3702.AT5G02490.1	0	0	0	0	0	0.655	0	0	0.655
HSP81-2	HSP70	633798	620395	3702.AT5G56030.2	3702.AT3G12580.1	0	0	0	0	0	0.655	0	0	0.655
HSP81-3	HSP70T-2	633796	617441	3702.AT5G56010.1	3702.AT2G32120.1	0	0	0	0	0	0.655	0	0	0.655
PRSL1	TOPP4	628727	618272	3702.AT4G40100.1	3702.AT2G39840.1	0	0	0	0	0	0.655	0	0	0.655
Hsp70-2	CR88	628884	615213	3702.AT5G02490.1	3702.AT2G04030.1	0	0	0	0	0	0.655	0	0	0.655
HSP70T-2	CR88	617441	615213	3702.AT2G32120.1	3702.AT2G04030.1	0	0	0	0	0	0.655	0	0	0.655
PRN	GPA1	624137	616824	3702.AT3G59220.1	3702.AT2G26300.1	0	0	0	0	0	0.655	0	0	0.655
ARCK1	CRK36	625617	625060	3702.AT4G11890.3	3702.AT4G04490.1	0	0	0	0.895	0	0.655	0	0	0.655
HSP81-2	HSP70T-2	633798	617441	3702.AT5G56030.2	3702.AT2G32120.1	0	0	0	0	0	0.655	0	0	0.655
CR88	Hsp70b	615213	609455	3702.AT2G04030.1	3702.AT1G16030.1	0	0	0	0	0	0.655	0	0	0.655
SIB1	WRKY33	623880	618130	3702.AT3G56710.1	3702.AT2G38470.1	0	0	0	0	0	0.655	0	0	0.655
HSP81-2	AT3G09440	633798	620055	3702.AT5G56030.2	3702.AT3G09440.1	0	0	0	0	0	0.655	0	0	0.655
PKS1	PHYA	615110	608751	3702.AT2G02950.1	3702.AT1G09570.1	0	0	0	0	0	0.655	0	0	0.655
ZTL	FKF1	633942	613591	3702.AT5G57360.2	3702.AT1G68050.1	0	0	0	0.964	0	0.655	0	0	0.655
HSP90.1	HSP70T-2	633425	617441	3702.AT5G52640.1	3702.AT2G32120.1	0	0	0	0	0	0.655	0	0	0.655
FHL	PAT3	628856	618046	3702.AT5G02200.2	3702.AT2G37678.1	0	0	0	0.708	0	0.655	0	0	0.655
PHYB	PKS1	616034	615110	3702.AT2G18790.1	3702.AT2G02950.1	0	0	0	0	0	0.655	0	0	0.655
EDA25	AT1G52930	614042	612167	3702.AT1G72440.1	3702.AT1G52930.1	0	0	0	0	0	0.654	0	0	0.654
AT3G15460	EDA25	620738	614042	3702.AT3G15460.1	3702.AT1G72440.1	0	0	0	0	0	0.654	0	0	0.654
AT5G27120	AT3G15460	631316	620738	3702.AT5G27120.1	3702.AT3G15460.1	0	0	0	0	0	0.653	0	0	0.653
AT5G27120	AT1G52930	631316	612167	3702.AT5G27120.1	3702.AT1G52930.1	0	0	0	0	0	0.653	0	0	0.653
AT5G27120	ATRPAC42	631316	612815	3702.AT5G27120.1	3702.AT1G60850.1	0	0	0	0	0	0.653	0	0	0.653
AT3G05060	AT1G52930	619621	612167	3702.AT3G05060.1	3702.AT1G52930.1	0	0	0	0	0	0.653	0	0	0.653
AT3G05060	ATRPAC42	619621	612815	3702.AT3G05060.1	3702.AT1G60850.1	0	0	0	0	0	0.653	0	0	0.653
REBELOTE	AT3G05060	623753	619621	3702.AT3G55510.1	3702.AT3G05060.1	0	0	0	0	0	0.653	0	0	0.653
AT3G15460	AT3G05060	620738	619621	3702.AT3G15460.1	3702.AT3G05060.1	0	0	0	0	0	0.653	0	0	0.653
AT5G27120	REBELOTE	631316	623753	3702.AT5G27120.1	3702.AT3G55510.1	0	0	0	0	0	0.653	0	0	0.653
GSTU5	DHAR1	617148	609811	3702.AT2G29450.1	3702.AT1G19570.1	0	0	0	0	0	0.048	0.65	0	0.652
GSTU23	DHAR1	614647	609811	3702.AT1G78320.1	3702.AT1G19570.1	0	0	0	0	0	0.048	0.65	0	0.652
AT5G15750	RPL3P	630199	620955	3702.AT5G15750.1	3702.AT3G17465.1	0	0	0	0	0	0.652	0	0	0.652
DHAR1	ERD9	609811	608839	3702.AT1G19570.1	3702.AT1G10370.1	0	0	0	0	0	0.048	0.65	0	0.652
GSTU20	DHAR1	614650	609811	3702.AT1G78370.1	3702.AT1G19570.1	0	0	0	0	0	0.048	0.65	0	0.652
AT5G15750	RPL3B	630199	612904	3702.AT5G15750.1	3702.AT1G61580.1	0	0	0	0	0	0.652	0	0	0.652
PAL1	4CL1	617980	612034	3702.AT2G37040.1	3702.AT1G51680.1	0	0	0	0	0	0	0.65	0	0.65
DIN10	cwINV6	630686	629844	3702.AT5G20250.4	3702.AT5G11920.1	0	0	0	0	0	0	0.65	0	0.65
GolS1	UGE1	619064	609105	3702.AT2G47180.1	3702.AT1G12780.1	0	0	0	0	0	0	0.65	0	0.65
SIP2	GolS1	623964	619064	3702.AT3G57520.1	3702.AT2G47180.1	0	0	0	0	0	0	0.65	0	0.65
OPR3	OPCL1	615372	609902	3702.AT2G06050.2	3702.AT1G20510.1	0	0	0	0	0	0	0.65	0	0.65
NRT2.6	NIA1	622643	614589	3702.AT3G45060.1	3702.AT1G77760.1	0	0	0	0	0	0	0.65	0	0.65
AOC2	OPR3	621866	615372	3702.AT3G25770.1	3702.AT2G06050.2	0	0	0	0	0	0	0.65	0	0.65
AT5G14580	AT1G14250	630081	609260	3702.AT5G14580.1	3702.AT1G14250.1	0	0	0	0	0	0	0.65	0	0.65
AT3G43670	PAO2	622502	618621	3702.AT3G43670.1	3702.AT2G43020.1	0	0	0	0	0	0	0.65	0	0.65
UGP1	UGE1	619417	609105	3702.AT3G03250.1	3702.AT1G12780.1	0	0	0	0	0	0	0.65	0	0.65
SPDS3	ACS6	633478	625551	3702.AT5G53120.6	3702.AT4G11280.1	0	0	0	0	0	0	0.65	0	0.65
POLGAMMA1	AT1G14250	621293	609260	3702.AT3G20540.2	3702.AT1G14250.1	0	0	0	0	0	0	0.65	0	0.65
PAL1	4CL3	617980	613271	3702.AT2G37040.1	3702.AT1G65060.1	0	0	0	0	0	0	0.65	0	0.65
AT3G13940	AT1G14250	620567	609260	3702.AT3G13940.1	3702.AT1G14250.1	0	0	0	0	0	0	0.65	0	0.65
KAT5	ACX4	633021	623364	3702.AT5G48880.2	3702.AT3G51840.1	0	0	0	0	0	0	0.65	0	0.65
AT3G18600	AT1G23280	621083	610202	3702.AT3G18600.1	3702.AT1G23280.1	0	0	0	0	0	0.65	0	0	0.65
NRT2.6	NIA2	622643	611395	3702.AT3G45060.1	3702.AT1G37130.1	0	0	0	0	0	0	0.65	0	0.65
cwINV6	BGLU8	629844	624512	3702.AT5G11920.1	3702.AT3G62750.1	0	0	0	0	0	0	0.65	0	0.65
AT5G15950	MAT3	630222	617957	3702.AT5G15950.2	3702.AT2G36880.2	0	0	0	0	0	0	0.65	0	0.65
PFK3	AT1G06030	627229	608374	3702.AT4G26270.1	3702.AT1G06030.1	0	0	0	0	0	0	0.65	0	0.65
ACS6	MAT3	625551	617957	3702.AT4G11280.1	3702.AT2G36880.2	0	0	0	0	0	0	0.65	0	0.65
DHAR1	GSTF6	609811	608044	3702.AT1G19570.1	3702.AT1G02930.1	0	0	0	0	0	0	0.65	0	0.65
DIN10	GolS1	630686	619064	3702.AT5G20250.4	3702.AT2G47180.1	0	0	0	0	0	0	0.65	0	0.65
AT5G14580	AT3G13940	630081	620567	3702.AT5G14580.1	3702.AT3G13940.1	0	0	0	0	0	0	0.65	0	0.65
AT1G16350	AT1G14250	609484	609260	3702.AT1G16350.1	3702.AT1G14250.1	0	0	0	0	0	0	0.65	0	0.65
PDE340	AT1G23280	629536	610202	3702.AT5G08610.1	3702.AT1G23280.1	0	0	0	0	0	0.65	0	0	0.65
GLN1-1	GDH1	631781	630457	3702.AT5G37600.1	3702.AT5G18170.1	0	0	0	0	0	0	0.65	0	0.65
AT5G14580	RPC14	630081	617158	3702.AT5G14580.1	3702.AT2G29540.3	0	0	0	0	0	0	0.65	0	0.65
AT5G14580	NRPA2	630081	610798	3702.AT5G14580.1	3702.AT1G29940.1	0	0	0	0	0	0	0.65	0	0.65
APX2	DHAR1	620073	609811	3702.AT3G09640.1	3702.AT1G19570.1	0	0	0	0	0	0	0.65	0	0.65
UGP1	TPS8	619417	613827	3702.AT3G03250.1	3702.AT1G70290.1	0	0	0	0	0	0	0.65	0	0.65
NRPA2	AT1G14250	610798	609260	3702.AT1G29940.1	3702.AT1G14250.1	0	0	0	0	0	0	0.65	0	0.65
SPDS3	AT5G15950	633478	630222	3702.AT5G53120.6	3702.AT5G15950.2	0	0	0	0	0	0	0.65	0	0.65
AOC3	OPR3	621867	615372	3702.AT3G25780.1	3702.AT2G06050.2	0	0	0	0	0	0	0.65	0	0.65
TK1b	AT1G14250	630908	609260	3702.AT5G23070.1	3702.AT1G14250.1	0	0	0	0	0	0	0.65	0	0.65
RHM1	UGE1	614671	609105	3702.AT1G78570.1	3702.AT1G12780.1	0	0	0	0.621	0	0	0.65	0	0.65
DHAR1	GSTF7	609811	608043	3702.AT1G19570.1	3702.AT1G02920.1	0	0	0	0	0	0	0.65	0	0.65
cwINV6	BGLU16	629844	624227	3702.AT5G11920.1	3702.AT3G60130.1	0	0	0	0	0	0	0.65	0	0.65
ACX4	OPCL1	623364	609902	3702.AT3G51840.1	3702.AT1G20510.1	0	0	0	0	0	0	0.65	0	0.65
RPC14	AT1G14250	617158	609260	3702.AT2G29540.3	3702.AT1G14250.1	0	0	0	0	0	0	0.65	0	0.65
STRS2	AT1G23280	629537	610202	3702.AT5G08620.1	3702.AT1G23280.1	0	0	0	0	0	0.65	0	0	0.65
ACS6	SPDS1	625551	610253	3702.AT4G11280.1	3702.AT1G23820.1	0	0	0	0	0	0	0.65	0	0.65
cwINV6	SIP2	629844	623964	3702.AT5G11920.1	3702.AT3G57520.1	0	0	0	0	0	0	0.65	0	0.65
DHAR1	GSTF5	609811	608045	3702.AT1G19570.1	3702.AT1G02940.1	0	0	0	0	0	0	0.65	0	0.65
cwINV6	AT1G06030	629844	608374	3702.AT5G11920.1	3702.AT1G06030.1	0	0	0	0	0	0	0.65	0	0.65
AT5G15950	SPDS1	630222	610253	3702.AT5G15950.2	3702.AT1G23820.1	0	0	0	0	0	0	0.65	0	0.65
ATRPAC42	AT1G14250	612815	609260	3702.AT1G60850.1	3702.AT1G14250.1	0	0	0	0	0	0	0.65	0	0.65
cwINV6	BGLU1	629844	611551	3702.AT5G11920.1	3702.AT1G45191.1	0	0	0	0	0	0	0.65	0	0.65
AT5G15950	ACS6	630222	625551	3702.AT5G15950.2	3702.AT4G11280.1	0	0	0	0	0	0	0.65	0	0.65
GSTF8	DHAR1	619119	609811	3702.AT2G47730.1	3702.AT1G19570.1	0	0	0	0	0	0	0.65	0	0.65
AT4G02930	AT3G57490	624941	623961	3702.AT4G02930.1	3702.AT3G57490.1	0	0	0	0	0	0.647	0	0	0.647
PSAF	CAB3	610943	610795	3702.AT1G31330.1	3702.AT1G29910.1	0	0	0	0	0	0.47	0.36	0	0.646
AT5G54910	NOP56	633677	612513	3702.AT5G54910.1	3702.AT1G56110.1	0	0	0	0	0	0.644	0	0	0.644
AT4G30990	AT3G57940	627744	624006	3702.AT4G30990.2	3702.AT3G57940.1	0	0	0	0	0	0.643	0	0	0.643
AT5G15750	MEE49	630199	624780	3702.AT5G15750.1	3702.AT4G01560.1	0	0	0	0	0	0.642	0	0	0.642
RPL3P	AT2G37990	620955	618078	3702.AT3G17465.1	3702.AT2G37990.1	0	0	0	0	0	0.64	0	0	0.64
EMB2785	RPL3B	617322	612904	3702.AT2G31060.3	3702.AT1G61580.1	0	0	0	0	0	0.639	0	0	0.639
RPL3P	EMB2785	620955	617322	3702.AT3G17465.1	3702.AT2G31060.3	0	0	0	0	0	0.639	0	0	0.639
AT4G16630	AT1G23280	626179	610202	3702.AT4G16630.1	3702.AT1G23280.1	0	0	0	0	0	0.638	0	0	0.638
AT3G58660	NSN1	624079	619849	3702.AT3G58660.1	3702.AT3G07050.1	0	0	0	0	0	0.637	0	0	0.637
AT5G14520	AT3G57940	630075	624006	3702.AT5G14520.1	3702.AT3G57940.1	0	0	0	0	0	0.236	0.54	0	0.633
STRS2	AT1G50920	629537	611953	3702.AT5G08620.1	3702.AT1G50920.1	0	0	0	0	0	0.631	0	0	0.631
AT3G18600	AT1G50920	621083	611953	3702.AT3G18600.1	3702.AT1G50920.1	0	0	0	0	0	0.631	0	0	0.631
PDE340	AT1G50920	629536	611953	3702.AT5G08610.1	3702.AT1G50920.1	0	0	0	0	0	0.631	0	0	0.631
FBA5	LOS2	627259	617918	3702.AT4G26530.2	3702.AT2G36530.1	0	0	0	0	0	0.102	0.6	0	0.625
LOS2	FBA6	617918	617912	3702.AT2G36530.1	3702.AT2G36460.1	0	0	0	0	0	0.102	0.6	0	0.625
AT4G02930	AT1G25260	624941	610373	3702.AT4G02930.1	3702.AT1G25260.1	0	0	0	0	0	0.622	0	0	0.622
AT3G58660	EDA7	624079	623909	3702.AT3G58660.1	3702.AT3G56990.1	0	0	0	0	0	0.62	0	0	0.62
AT3G58660	AT1G23280	624079	610202	3702.AT3G58660.1	3702.AT1G23280.1	0	0	0	0	0	0.62	0	0	0.62
BIP2	ATERDJ3A	632249	620005	3702.AT5G42020.1	3702.AT3G08970.1	0	0	0	0	0	0.619	0	0	0.619
OASA2	MGL	621506	613231	3702.AT3G22460.1	3702.AT1G64660.1	0	0	0	0	0	0.082	0.6	0	0.617
AT5G15750	EMB2785	630199	617322	3702.AT5G15750.1	3702.AT2G31060.3	0	0	0	0	0	0.617	0	0	0.617
COP9	CUL3	625859	610496	3702.AT4G14110.1	3702.AT1G26830.1	0	0	0	0	0	0.617	0	0	0.617
Hsp70-2	JAC1	628884	614317	3702.AT5G02490.1	3702.AT1G75100.1	0	0	0	0	0	0.616	0	0	0.616
JAC1	Hsp70b	614317	609455	3702.AT1G75100.1	3702.AT1G16030.1	0	0	0	0	0	0.616	0	0	0.616
HSP70T-2	JAC1	617441	614317	3702.AT2G32120.1	3702.AT1G75100.1	0	0	0	0	0	0.616	0	0	0.616
AT3G09440	JAC1	620055	614317	3702.AT3G09440.1	3702.AT1G75100.1	0	0	0	0	0	0.616	0	0	0.616
RPL3P	AT1G23280	620955	610202	3702.AT3G17465.1	3702.AT1G23280.1	0	0	0	0	0	0.616	0	0	0.616
HSP70	JAC1	620395	614317	3702.AT3G12580.1	3702.AT1G75100.1	0	0	0	0	0	0.616	0	0	0.616
RACK1C_AT	AT1G25260	621027	610373	3702.AT3G18130.1	3702.AT1G25260.1	0	0	0	0	0	0.613	0	0	0.613
SGT1A	AT2G30600	626937	617270	3702.AT4G23570.3	3702.AT2G30600.5	0	0	0	0	0	0.194	0.54	0	0.613
NPR3	CUL3	632609	610496	3702.AT5G45110.1	3702.AT1G26830.1	0	0	0	0	0	0.612	0	0	0.612
AT5G08180	AT1G06720	629485	608446	3702.AT5G08180.2	3702.AT1G06720.1	0	0	0	0	0	0.611	0	0	0.611
AT5G08180	PWP2	629485	609393	3702.AT5G08180.2	3702.AT1G15440.1	0	0	0	0	0	0.611	0	0	0.611
AT5G08180	AT4G04940	629485	625105	3702.AT5G08180.2	3702.AT4G04940.1	0	0	0	0	0	0.611	0	0	0.611
AT5G08180	AT3G06530	629485	619794	3702.AT5G08180.2	3702.AT3G06530.2	0	0	0	0	0	0.611	0	0	0.611
AT5G08180	AT3G57000	629485	623910	3702.AT5G08180.2	3702.AT3G57000.1	0	0	0	0	0	0.611	0	0	0.611
AT5G22100	AT5G08180	630804	629485	3702.AT5G22100.1	3702.AT5G08180.2	0	0	0	0	0	0.611	0	0	0.611
AT5G08180	AT3G10530	629485	620173	3702.AT5G08180.2	3702.AT3G10530.1	0	0	0	0	0	0.611	0	0	0.611
TOZ	AT5G08180	630307	629485	3702.AT5G16750.1	3702.AT5G08180.2	0	0	0	0	0	0.611	0	0	0.611
AT5G08180	AT4G28450	629485	627468	3702.AT5G08180.2	3702.AT4G28450.1	0	0	0	0	0	0.611	0	0	0.611
ACBP5	ckl3	631365	627518	3702.AT5G27630.1	3702.AT4G28880.1	0	0	0	0	0	0.611	0	0	0.611
AT5G08180	AT3G21540	629485	621403	3702.AT5G08180.2	3702.AT3G21540.1	0	0	0	0	0	0.611	0	0	0.611
AT1G79150	NOP56	614735	612513	3702.AT1G79150.1	3702.AT1G56110.1	0	0	0	0	0	0.603	0	0	0.603
CPK28	RBOHD	634888	632911	3702.AT5G66210.1	3702.AT5G47910.1	0	0	0	0	0	0	0.6	0	0.6
PIF4	RGL1	618619	613410	3702.AT2G43010.1	3702.AT1G66350.1	0	0	0	0	0	0	0.6	0	0.6
SAHH2	OASA2	621659	621506	3702.AT3G23810.1	3702.AT3G22460.1	0	0	0	0	0	0	0.6	0	0.6
RBOHD	CPK29	632911	614406	3702.AT5G47910.1	3702.AT1G76040.2	0	0	0	0	0	0	0.6	0	0.6
AT3G43670	GLX1	622502	609003	3702.AT3G43670.1	3702.AT1G11840.6	0	0	0	0	0	0	0.6	0	0.6
DHS1	FBA6	628711	617912	3702.AT4G39980.1	3702.AT2G36460.1	0	0	0	0	0	0	0.6	0	0.6
PAL1	ADT1	617980	608999	3702.AT2G37040.1	3702.AT1G11790.1	0	0	0	0	0	0	0.6	0	0.6
NPR3	SGT1A	632609	626937	3702.AT5G45110.1	3702.AT4G23570.3	0	0	0	0	0	0.167	0.54	0	0.6
OASA2	At3g03780	621506	619478	3702.AT3G22460.1	3702.AT3G03780.1	0	0	0	0	0	0	0.6	0	0.6
GDH1	IDH-V	630457	628967	3702.AT5G18170.1	3702.AT5G03290.1	0	0	0	0	0	0	0.6	0	0.6
DHS1	FBA5	628711	627259	3702.AT4G39980.1	3702.AT4G26530.2	0	0	0	0	0	0	0.6	0	0.6
ASN2	AK2	634754	630028	3702.AT5G65010.2	3702.AT5G14060.2	0	0	0	0	0	0	0.6	0	0.6
RBOHD	CPK32	632911	623965	3702.AT5G47910.1	3702.AT3G57530.1	0	0	0	0	0	0	0.6	0	0.6
AK2	ASN1	630028	622874	3702.AT5G14060.2	3702.AT3G47340.1	0	0	0	0	0	0	0.6	0	0.6
AT4G26600	AT3G18600	627267	621083	3702.AT4G26600.1	3702.AT3G18600.1	0	0	0	0	0	0.599	0	0	0.599
OLI2	AT3G18600	633787	621083	3702.AT5G55920.1	3702.AT3G18600.1	0	0	0	0	0	0.599	0	0	0.599
OLI2	PDE340	633787	629536	3702.AT5G55920.1	3702.AT5G08610.1	0	0	0	0	0	0.599	0	0	0.599
OLI2	STRS2	633787	629537	3702.AT5G55920.1	3702.AT5G08620.1	0	0	0	0	0	0.599	0	0	0.599
STRS2	AT4G26600	629537	627267	3702.AT5G08620.1	3702.AT4G26600.1	0	0	0	0	0	0.599	0	0	0.599
PDE340	AT4G26600	629536	627267	3702.AT5G08610.1	3702.AT4G26600.1	0	0	0	0	0	0.599	0	0	0.599
AT3G58660	AT3G15460	624079	620738	3702.AT3G58660.1	3702.AT3G15460.1	0	0	0	0	0	0.598	0	0	0.598
EMB3007	CPN10	630530	609343	3702.AT5G18820.1	3702.AT1G14980.1	0	0	0	0	0	0.598	0	0	0.598
CPN60A	CPN10	617000	609343	3702.AT2G28000.1	3702.AT1G14980.1	0	0	0	0	0	0.598	0	0	0.598
Cpn60beta2	CPN10	620506	609343	3702.AT3G13470.1	3702.AT1G14980.1	0	0	0	0	0	0.598	0	0	0.598
HSP60-2	CPN10	617560	609343	3702.AT2G33210.1	3702.AT1G14980.1	0	0	0	0	0	0.598	0	0	0.598
HSP60	CPN10	621678	609343	3702.AT3G23990.1	3702.AT1G14980.1	0	0	0	0	0	0.598	0	0	0.598
AT3G58660	AT1G52930	624079	612167	3702.AT3G58660.1	3702.AT1G52930.1	0	0	0	0	0	0.598	0	0	0.598
AT2G42710	RPL3B	618587	612904	3702.AT2G42710.1	3702.AT1G61580.1	0	0	0	0	0	0.595	0	0	0.595
AT5G15750	AT4G27130	630199	627322	3702.AT5G15750.1	3702.AT4G27130.1	0	0	0	0	0	0.595	0	0	0.595
AT5G15750	AT2G42710	630199	618587	3702.AT5G15750.1	3702.AT2G42710.1	0	0	0	0	0	0.595	0	0	0.595
AT5G54940	AT5G15750	633680	630199	3702.AT5G54940.1	3702.AT5G15750.1	0	0	0	0	0	0.595	0	0	0.595
MEE49	NOP56	624780	612513	3702.AT4G01560.1	3702.AT1G56110.1	0	0	0	0	0	0.594	0	0	0.594
AT3G11964	AT1G52930	620332	612167	3702.AT3G11964.1	3702.AT1G52930.1	0	0	0	0	0	0.592	0	0	0.592
AT3G15460	AT3G11964	620738	620332	3702.AT3G15460.1	3702.AT3G11964.1	0	0	0	0	0	0.592	0	0	0.592
RPL3P	AT3G11964	620955	620332	3702.AT3G17465.1	3702.AT3G11964.1	0	0	0	0	0	0.591	0	0	0.591
AT3G11964	RPL3B	620332	612904	3702.AT3G11964.1	3702.AT1G61580.1	0	0	0	0	0	0.591	0	0	0.591
AT3G57940	NAP57	624006	623927	3702.AT3G57940.1	3702.AT3G57150.1	0	0	0	0	0	0.584	0	0	0.584
AT5G15950	AT3G12050	630222	620341	3702.AT5G15950.2	3702.AT3G12050.1	0	0	0	0	0	0.583	0	0	0.583
NPR3	AT2G30600	632609	617270	3702.AT5G45110.1	3702.AT2G30600.5	0	0	0	0	0	0.131	0.54	0	0.583
NF-YB3	NF-YA5	625919	612310	3702.AT4G14540.1	3702.AT1G54160.1	0	0	0	0	0	0.583	0	0	0.583
STRS2	NSN1	629537	619849	3702.AT5G08620.1	3702.AT3G07050.1	0	0	0	0	0	0.578	0	0	0.578
AT5G15550	AT2G37990	630178	618078	3702.AT5G15550.1	3702.AT2G37990.1	0	0	0	0	0	0.121	0.54	0	0.578
AT3G18600	NSN1	621083	619849	3702.AT3G18600.1	3702.AT3G07050.1	0	0	0	0	0	0.578	0	0	0.578
PDE340	NSN1	629536	619849	3702.AT5G08610.1	3702.AT3G07050.1	0	0	0	0	0	0.578	0	0	0.578
AT4G26600	NOP56	627267	612513	3702.AT4G26600.1	3702.AT1G56110.1	0	0	0	0	0	0.576	0	0	0.576
OLI2	NOP56	633787	612513	3702.AT5G55920.1	3702.AT1G56110.1	0	0	0	0	0	0.576	0	0	0.576
BIR1	GPA1	632961	616824	3702.AT5G48380.1	3702.AT2G26300.1	0	0	0	0	0	0.575	0	0	0.575
BT4	SGT1A	635027	626937	3702.AT5G67480.2	3702.AT4G23570.3	0	0	0	0	0	0.114	0.54	0	0.575
AT4G25730	AT3G58660	627171	624079	3702.AT4G25730.1	3702.AT3G58660.1	0	0	0	0	0	0.567	0	0	0.567
ROC1	CUL3	628579	610496	3702.AT4G38740.1	3702.AT1G26830.1	0	0	0	0	0	0.566	0	0	0.566
BT4	AT2G30600	635027	617270	3702.AT5G67480.2	3702.AT2G30600.5	0	0	0	0	0	0.096	0.54	0	0.566
AT2G26190	PHYB	616813	616034	3702.AT2G26190.1	3702.AT2G18790.1	0	0	0	0	0	0.566	0	0	0.566
PHYB	AtHB23	616034	610510	3702.AT2G18790.1	3702.AT1G26960.1	0	0	0	0	0	0.566	0	0	0.566
CLPB3	PHYB	630168	616034	3702.AT5G15450.1	3702.AT2G18790.1	0	0	0	0	0	0.566	0	0	0.566
AT4G02930	Fes1A	624941	620046	3702.AT4G02930.1	3702.AT3G09350.1	0	0	0	0	0	0.565	0	0	0.565
PIL5	PIF3	616174	608747	3702.AT2G20180.2	3702.AT1G09530.2	0	0	0	0.657	0	0.564	0	0	0.564
PHYD	PIF3	626135	608747	3702.AT4G16250.1	3702.AT1G09530.2	0	0	0	0	0	0.564	0	0	0.564
PIF7	PIL5	634356	616174	3702.AT5G61270.1	3702.AT2G20180.2	0	0	0	0.632	0	0.564	0	0	0.564
PIF4	PIL5	618619	616174	3702.AT2G43010.1	3702.AT2G20180.2	0	0	0	0.707	0	0.564	0	0	0.564
PIL5	PAP3	616174	609314	3702.AT2G20180.2	3702.AT1G14700.1	0	0	0	0	0	0.564	0	0	0.564
PHYD	PAP3	626135	609314	3702.AT4G16250.1	3702.AT1G14700.1	0	0	0	0	0	0.564	0	0	0.564
RGL1	BES1	613410	609787	3702.AT1G66350.1	3702.AT1G19350.3	0	0	0	0	0	0.563	0	0	0.563
PHOT1	RPT2	622718	617261	3702.AT3G45780.2	3702.AT2G30520.1	0	0	0	0	0	0.562	0	0	0.562
PHYA	HFR1	608751	607982	3702.AT1G09570.1	3702.AT1G02340.1	0	0	0	0	0	0.562	0	0	0.562
CBF1	HAG1	627143	623657	3702.AT4G25490.1	3702.AT3G54610.1	0	0	0	0	0	0.562	0	0	0.562
PAL1	AT1G80440	617980	614860	3702.AT2G37040.1	3702.AT1G80440.1	0	0	0	0	0	0.562	0	0	0.562
AT4G34290	AT1G04880	628109	608247	3702.AT4G34290.1	3702.AT1G04880.1	0	0	0	0	0	0.562	0	0	0.562
PAR1	HBI1	618603	615986	3702.AT2G42870.1	3702.AT2G18300.3	0	0	0	0	0	0.562	0	0	0.562
BZIP28	BZIP60	620203	611431	3702.AT3G10800.1	3702.AT1G42990.1	0	0	0	0.61	0	0.562	0	0	0.562
PIF3	HFR1	608747	607982	3702.AT1G09530.2	3702.AT1G02340.1	0	0	0	0.662	0	0.562	0	0	0.562
HSP81-3	FKF1	633796	613591	3702.AT5G56010.1	3702.AT1G68050.1	0	0	0	0	0	0.562	0	0	0.562
PHYB	HFR1	616034	607982	3702.AT2G18790.1	3702.AT1G02340.1	0	0	0	0	0	0.562	0	0	0.562
NF-YB3	BZIP28	625919	620203	3702.AT4G14540.1	3702.AT3G10800.1	0	0	0	0	0	0.562	0	0	0.562
AT4G34290	AT1G76110	628109	614414	3702.AT4G34290.1	3702.AT1G76110.1	0	0	0	0	0	0.562	0	0	0.562
NUDT7	TUB5	625701	609853	3702.AT4G12720.4	3702.AT1G20010.1	0	0	0	0	0	0.562	0	0	0.562
PIF4	ELF4	618619	618299	3702.AT2G43010.1	3702.AT2G40080.1	0	0	0	0	0	0.562	0	0	0.562
PAP3	HFR1	609314	607982	3702.AT1G14700.1	3702.AT1G02340.1	0	0	0	0	0	0.562	0	0	0.562
RRTF1	PFT1	628121	610405	3702.AT4G34410.1	3702.AT1G25540.1	0	0	0	0	0	0.561	0	0	0.561
GSTF6	GSTF7	608044	608043	3702.AT1G02930.1	3702.AT1G02920.1	0	0	0	0.984	0	0.561	0	0	0.561
JKD	MGP	628952	608137	3702.AT5G03150.1	3702.AT1G03840.1	0	0	0	0.877	0	0.561	0	0	0.561
RGL1	JAZ1	613410	609771	3702.AT1G66350.1	3702.AT1G19180.1	0	0	0	0	0	0.56	0	0	0.56
PIF4	PHYB	618619	616034	3702.AT2G43010.1	3702.AT2G18790.1	0	0	0	0	0	0.56	0	0	0.56
WAK2	MYB51	609982	609708	3702.AT1G21270.1	3702.AT1G18570.1	0	0	0	0	0	0.56	0	0	0.56
PIF4	PHYA	618619	608751	3702.AT2G43010.1	3702.AT1G09570.1	0	0	0	0	0	0.56	0	0	0.56
PHOT2	PKS1	634029	615110	3702.AT5G58140.2	3702.AT2G02950.1	0	0	0	0	0	0.559	0	0	0.559
RPP8	EDS1	632420	622952	3702.AT5G43470.2	3702.AT3G48090.1	0	0	0	0	0	0.559	0	0	0.559
HRB1	PFT1	633059	610405	3702.AT5G49230.1	3702.AT1G25540.1	0	0	0	0	0	0.559	0	0	0.559
NPH3	PHOT2	634675	634029	3702.AT5G64330.1	3702.AT5G58140.2	0	0	0	0	0	0.559	0	0	0.559
TOZ	AT4G25730	630307	627171	3702.AT5G16750.1	3702.AT4G25730.1	0	0	0	0	0	0.559	0	0	0.559
HRB1	CRY2	633059	608194	3702.AT5G49230.1	3702.AT1G04400.1	0	0	0	0	0	0.559	0	0	0.559
HRB1	PHYB	633059	616034	3702.AT5G49230.1	3702.AT2G18790.1	0	0	0	0	0	0.559	0	0	0.559
CDF2	FKF1	631999	613591	3702.AT5G39660.1	3702.AT1G68050.1	0	0	0	0	0	0.559	0	0	0.559
HRB1	PIF4	633059	618619	3702.AT5G49230.1	3702.AT2G43010.1	0	0	0	0	0	0.559	0	0	0.559
FHL	LAF1	628856	627151	3702.AT5G02200.2	3702.AT4G25560.1	0	0	0	0	0	0.558	0	0	0.558
AT3G28270	PDIL1-1	622149	610035	3702.AT3G28270.1	3702.AT1G21750.1	0	0	0	0	0	0.558	0	0	0.558
MAX2	BES1	618579	609787	3702.AT2G42620.1	3702.AT1G19350.3	0	0	0	0	0	0.558	0	0	0.558
PAT3	HFR1	618046	607982	3702.AT2G37678.1	3702.AT1G02340.1	0	0	0	0	0	0.558	0	0	0.558
SAL1	PAT3	634640	618046	3702.AT5G63980.1	3702.AT2G37678.1	0	0	0	0	0	0.558	0	0	0.558
EMB1789	TOPP4	633894	618272	3702.AT5G56930.1	3702.AT2G39840.1	0	0	0	0	0	0.558	0	0	0.558
MYBL2	BES1	613907	609787	3702.AT1G71030.1	3702.AT1G19350.3	0	0	0	0	0	0.558	0	0	0.558
LAF1	PAT3	627151	618046	3702.AT4G25560.1	3702.AT2G37678.1	0	0	0	0	0	0.558	0	0	0.558
HY5	LAF1	629775	627151	3702.AT5G11260.1	3702.AT4G25560.1	0	0	0	0	0	0.558	0	0	0.558
FHL	HFR1	628856	607982	3702.AT5G02200.2	3702.AT1G02340.1	0	0	0	0	0	0.558	0	0	0.558
ERF4	PFT1	620706	610405	3702.AT3G15210.1	3702.AT1G25540.1	0	0	0	0	0	0.558	0	0	0.558
HY5	HFR1	629775	607982	3702.AT5G11260.1	3702.AT1G02340.1	0	0	0	0	0	0.558	0	0	0.558
ATHB-15	MYB51	612083	609708	3702.AT1G52150.2	3702.AT1G18570.1	0	0	0	0	0	0.557	0	0	0.557
BRG3	MYB51	620433	609708	3702.AT3G12920.1	3702.AT1G18570.1	0	0	0	0	0	0.557	0	0	0.557
RING	MYB51	626520	609708	3702.AT4G19700.1	3702.AT1G18570.1	0	0	0	0	0	0.557	0	0	0.557
SPDS3	MYB51	633478	609708	3702.AT5G53120.6	3702.AT1G18570.1	0	0	0	0	0	0.557	0	0	0.557
PDE340	AT4G28450	629536	627468	3702.AT5G08610.1	3702.AT4G28450.1	0	0	0	0	0	0.555	0	0	0.555
STRS2	AT4G28450	629537	627468	3702.AT5G08620.1	3702.AT4G28450.1	0	0	0	0	0	0.555	0	0	0.555
AT4G28450	AT3G18600	627468	621083	3702.AT4G28450.1	3702.AT3G18600.1	0	0	0	0	0	0.555	0	0	0.555
AT3G18600	AT3G15460	621083	620738	3702.AT3G18600.1	3702.AT3G15460.1	0	0	0	0	0	0.553	0	0	0.553
PDE340	AT3G15460	629536	620738	3702.AT5G08610.1	3702.AT3G15460.1	0	0	0	0	0	0.553	0	0	0.553
STRS2	AT3G15460	629537	620738	3702.AT5G08620.1	3702.AT3G15460.1	0	0	0	0	0	0.553	0	0	0.553
STRS2	AT1G52930	629537	612167	3702.AT5G08620.1	3702.AT1G52930.1	0	0	0	0	0	0.553	0	0	0.553
AT3G18600	AT1G52930	621083	612167	3702.AT3G18600.1	3702.AT1G52930.1	0	0	0	0	0	0.553	0	0	0.553
PDE340	AT1G52930	629536	612167	3702.AT5G08610.1	3702.AT1G52930.1	0	0	0	0	0	0.553	0	0	0.553
AT4G13170	AT1G23280	625749	610202	3702.AT4G13170.1	3702.AT1G23280.1	0	0	0	0	0	0.552	0	0	0.552
AT4G13170	AT2G40360	625749	618335	3702.AT4G13170.1	3702.AT2G40360.1	0	0	0	0	0	0.552	0	0	0.552
AT4G15770	AT4G13170	626072	625749	3702.AT4G15770.1	3702.AT4G13170.1	0	0	0	0	0	0.552	0	0	0.552
CAB3	PSAD-2	610795	608069	3702.AT1G29910.1	3702.AT1G03130.1	0	0	0	0	0	0.327	0.36	0	0.55
AT5G15750	AT1G25260	630199	610373	3702.AT5G15750.1	3702.AT1G25260.1	0	0	0	0	0	0.547	0	0	0.547
PDE340	AT5G08600	629536	629535	3702.AT5G08610.1	3702.AT5G08600.2	0	0	0	0	0	0.547	0	0	0.547
AT4G13170	RPL3P	625749	620955	3702.AT4G13170.1	3702.AT3G17465.1	0	0	0	0	0	0.547	0	0	0.547
AT5G15750	AT4G13170	630199	625749	3702.AT5G15750.1	3702.AT4G13170.1	0	0	0	0	0	0.547	0	0	0.547
TOZ	STRS2	630307	629537	3702.AT5G16750.1	3702.AT5G08620.1	0	0	0	0	0	0.547	0	0	0.547
STRS2	AT5G08600	629537	629535	3702.AT5G08620.1	3702.AT5G08600.2	0	0	0	0	0	0.547	0	0	0.547
RPL3P	AT1G25260	620955	610373	3702.AT3G17465.1	3702.AT1G25260.1	0	0	0	0	0	0.547	0	0	0.547
TOZ	AT3G18600	630307	621083	3702.AT5G16750.1	3702.AT3G18600.1	0	0	0	0	0	0.547	0	0	0.547
AT5G08600	AT3G18600	629535	621083	3702.AT5G08600.2	3702.AT3G18600.1	0	0	0	0	0	0.547	0	0	0.547
TOZ	PDE340	630307	629536	3702.AT5G16750.1	3702.AT5G08610.1	0	0	0	0	0	0.547	0	0	0.547
HSP81-3	ORG1	633796	633513	3702.AT5G56010.1	3702.AT5G53450.1	0	0	0	0	0	0.546	0	0	0.546
AT4G13170	EMB2785	625749	617322	3702.AT4G13170.1	3702.AT2G31060.3	0	0	0	0	0	0.546	0	0	0.546
AT5G54910	AT3G05060	633677	619621	3702.AT5G54910.1	3702.AT3G05060.1	0	0	0	0	0	0.546	0	0	0.546
AT4G13170	NSN1	625749	619849	3702.AT4G13170.1	3702.AT3G07050.1	0	0	0	0	0	0.546	0	0	0.546
AT4G25730	AT3G18600	627171	621083	3702.AT4G25730.1	3702.AT3G18600.1	0	0	0	0	0	0.546	0	0	0.546
AT5G14520	RPL3P	630075	620955	3702.AT5G14520.1	3702.AT3G17465.1	0	0	0	0	0	0.546	0	0	0.546
ORG1	HSP90.1	633513	633425	3702.AT5G53450.1	3702.AT5G52640.1	0	0	0	0	0	0.546	0	0	0.546
AT5G54910	AT5G27120	633677	631316	3702.AT5G54910.1	3702.AT5G27120.1	0	0	0	0	0	0.546	0	0	0.546
ORG1	CR88	633513	615213	3702.AT5G53450.1	3702.AT2G04030.1	0	0	0	0	0	0.546	0	0	0.546
HSP81-2	ORG1	633798	633513	3702.AT5G56030.2	3702.AT5G53450.1	0	0	0	0	0	0.546	0	0	0.546
dNK	HCF173	614000	609518	3702.AT1G72040.1	3702.AT1G16720.1	0	0	0	0	0	0.546	0	0	0.546
PDE340	AT4G25730	629536	627171	3702.AT5G08610.1	3702.AT4G25730.1	0	0	0	0	0	0.546	0	0	0.546
STRS2	AT4G25730	629537	627171	3702.AT5G08620.1	3702.AT4G25730.1	0	0	0	0	0	0.546	0	0	0.546
AT4G26600	RPL3B	627267	612904	3702.AT4G26600.1	3702.AT1G61580.1	0	0	0	0	0	0.545	0	0	0.545
HY5	MPK19	629775	620655	3702.AT5G11260.1	3702.AT3G14720.1	0	0	0	0	0	0.545	0	0	0.545
AT1G76110	HDA08	614414	608635	3702.AT1G76110.1	3702.AT1G08460.1	0	0	0	0	0	0.545	0	0	0.545
AT5G15750	ATRPAC42	630199	612815	3702.AT5G15750.1	3702.AT1G60850.1	0	0	0	0	0	0.545	0	0	0.545
HY5	MPK3	629775	622703	3702.AT5G11260.1	3702.AT3G45640.1	0	0	0	0	0	0.545	0	0	0.545
AT5G08180	AT1G31660	629485	610973	3702.AT5G08180.2	3702.AT1G31660.1	0	0	0	0	0	0.545	0	0	0.545
HDA08	AT1G04880	608635	608247	3702.AT1G08460.1	3702.AT1G04880.1	0	0	0	0	0	0.545	0	0	0.545
AT5G08180	RACK1C_AT	629485	621027	3702.AT5G08180.2	3702.AT3G18130.1	0	0	0	0	0	0.545	0	0	0.545
AT3G18600	AT1G25260	621083	610373	3702.AT3G18600.1	3702.AT1G25260.1	0	0	0	0	0	0.545	0	0	0.545
PDE340	AT1G25260	629536	610373	3702.AT5G08610.1	3702.AT1G25260.1	0	0	0	0	0	0.545	0	0	0.545
STRS2	AT1G25260	629537	610373	3702.AT5G08620.1	3702.AT1G25260.1	0	0	0	0	0	0.545	0	0	0.545
OLI2	RPL3B	633787	612904	3702.AT5G55920.1	3702.AT1G61580.1	0	0	0	0	0	0.545	0	0	0.545
BT4	NPR3	635027	632609	3702.AT5G67480.2	3702.AT5G45110.1	0	0	0	0	0	0.051	0.54	0	0.544
AT5G08600	AT1G50920	629535	611953	3702.AT5G08600.2	3702.AT1G50920.1	0	0	0	0	0	0.542	0	0	0.542
CR88	Hsp70-15	615213	614810	3702.AT2G04030.1	3702.AT1G79920.1	0	0	0	0	0	0.541	0	0	0.541
HSP81-3	Hsp70-15	633796	614810	3702.AT5G56010.1	3702.AT1G79920.1	0	0	0	0	0	0.541	0	0	0.541
HSP81-2	Hsp70-15	633798	614810	3702.AT5G56030.2	3702.AT1G79920.1	0	0	0	0	0	0.541	0	0	0.541
HSP90.1	Hsp70-15	633425	614810	3702.AT5G52640.1	3702.AT1G79920.1	0	0	0	0	0	0.541	0	0	0.541
AT2G40360	AT2G37990	618335	618078	3702.AT2G40360.1	3702.AT2G37990.1	0	0	0	0	0	0	0.54	0	0.54
MAX2	AT2G30600	618579	617270	3702.AT2G42620.1	3702.AT2G30600.5	0	0	0	0	0	0	0.54	0	0.54
ELIP1	LHCB4.2	621544	620000	3702.AT3G22840.1	3702.AT3G08940.2	0	0	0	0	0	0	0.54	0	0.54
NPR3	MAX2	632609	618579	3702.AT5G45110.1	3702.AT2G42620.1	0	0	0	0	0	0	0.54	0	0.54
AT5G14520	AT3G06530	630075	619794	3702.AT5G14520.1	3702.AT3G06530.2	0	0	0	0	0	0	0.54	0	0.54
ELIP2	AT1G76570	625936	614461	3702.AT4G14690.1	3702.AT1G76570.1	0	0	0	0	0	0	0.54	0	0.54
BT4	MAX2	635027	618579	3702.AT5G67480.2	3702.AT2G42620.1	0	0	0	0	0	0	0.54	0	0.54
AT5G14520	PWP2	630075	609393	3702.AT5G14520.1	3702.AT1G15440.1	0	0	0	0	0	0	0.54	0	0.54
LHCB2.2	AT1G76570	615303	614461	3702.AT2G05070.1	3702.AT1G76570.1	0	0	0	0.894	0	0	0.54	0	0.54
LHCA4	LHCB4.2	622888	620000	3702.AT3G47470.1	3702.AT3G08940.2	0	0	0	0.786	0	0	0.54	0	0.54
NPR3	AT1G80440	632609	614860	3702.AT5G45110.1	3702.AT1G80440.1	0	0	0	0	0	0	0.54	0	0.54
AT3G57940	AT2G40360	624006	618335	3702.AT3G57940.1	3702.AT2G40360.1	0	0	0	0	0	0	0.54	0	0.54
ELIP1	LHCB2.1	621544	615304	3702.AT3G22840.1	3702.AT2G05100.1	0	0	0	0	0	0	0.54	0	0.54
ELIP2	LHCB2.2	625936	615303	3702.AT4G14690.1	3702.AT2G05070.1	0	0	0	0	0	0	0.54	0	0.54
ELIP2	LHCB2.1	625936	615304	3702.AT4G14690.1	3702.AT2G05100.1	0	0	0	0	0	0	0.54	0	0.54
LHCB2.3	AT1G76570	622087	614461	3702.AT3G27690.1	3702.AT1G76570.1	0	0	0	0.896	0	0	0.54	0	0.54
ELIP2	ELIP1	625936	621544	3702.AT4G14690.1	3702.AT3G22840.1	0	0	0	0.972	0	0	0.54	0	0.54
AT5G15550	AT3G57940	630178	624006	3702.AT5G15550.1	3702.AT3G57940.1	0	0	0	0	0	0	0.54	0	0.54
LHCB2.1	AT1G76570	615304	614461	3702.AT2G05100.1	3702.AT1G76570.1	0	0	0	0.896	0	0	0.54	0	0.54
LHCB4.2	AT1G76570	620000	614461	3702.AT3G08940.2	3702.AT1G76570.1	0	0	0	0.751	0	0	0.54	0	0.54
AT2G40360	PWP2	618335	609393	3702.AT2G40360.1	3702.AT1G15440.1	0	0	0	0	0	0	0.54	0	0.54
AT5G15550	AT3G06530	630178	619794	3702.AT5G15550.1	3702.AT3G06530.2	0	0	0	0	0	0	0.54	0	0.54
AT2G30600	AT1G80440	617270	614860	3702.AT2G30600.5	3702.AT1G80440.1	0	0	0	0	0	0	0.54	0	0.54
LHCB2.3	ELIP1	622087	621544	3702.AT3G27690.1	3702.AT3G22840.1	0	0	0	0	0	0	0.54	0	0.54
ELIP1	LHCB2.2	621544	615303	3702.AT3G22840.1	3702.AT2G05070.1	0	0	0	0	0	0	0.54	0	0.54
AT1G76570	CAB3	614461	610795	3702.AT1G76570.1	3702.AT1G29910.1	0	0	0	0.89	0	0	0.54	0	0.54
ELIP1	CAB3	621544	610795	3702.AT3G22840.1	3702.AT1G29910.1	0	0	0	0	0	0	0.54	0	0.54
ELIP2	LHCA4	625936	622888	3702.AT4G14690.1	3702.AT3G47470.1	0	0	0	0	0	0	0.54	0	0.54
ELIP2	LHCB2.3	625936	622087	3702.AT4G14690.1	3702.AT3G27690.1	0	0	0	0	0	0	0.54	0	0.54
ELIP2	CAB3	625936	610795	3702.AT4G14690.1	3702.AT1G29910.1	0	0	0	0	0	0	0.54	0	0.54
AT3G06530	AT2G40360	619794	618335	3702.AT3G06530.2	3702.AT2G40360.1	0	0	0	0	0	0	0.54	0	0.54
LHCA4	ELIP1	622888	621544	3702.AT3G47470.1	3702.AT3G22840.1	0	0	0	0	0	0	0.54	0	0.54
LHCA4	AT1G76570	622888	614461	3702.AT3G47470.1	3702.AT1G76570.1	0	0	0	0.773	0	0	0.54	0	0.54
ELIP1	AT1G76570	621544	614461	3702.AT3G22840.1	3702.AT1G76570.1	0	0	0	0	0	0	0.54	0	0.54
ELIP2	LHCB4.2	625936	620000	3702.AT4G14690.1	3702.AT3G08940.2	0	0	0	0	0	0	0.54	0	0.54
BT4	AT1G80440	635027	614860	3702.AT5G67480.2	3702.AT1G80440.1	0	0	0	0	0	0	0.54	0	0.54
AT4G25730	AT4G13170	627171	625749	3702.AT4G25730.1	3702.AT4G13170.1	0	0	0	0	0	0.538	0	0	0.538
SIGF	ATRPAC42	617973	612815	3702.AT2G36990.1	3702.AT1G60850.1	0	0	0	0	0	0.537	0	0	0.537
ATRPAC42	SIG2	612815	608644	3702.AT1G60850.1	3702.AT1G08540.1	0	0	0	0	0	0.537	0	0	0.537
AT2G42710	AT1G25260	618587	610373	3702.AT2G42710.1	3702.AT1G25260.1	0	0	0	0	0	0.537	0	0	0.537
MEE49	AT3G11964	624780	620332	3702.AT4G01560.1	3702.AT3G11964.1	0	0	0	0	0	0.537	0	0	0.537
AT4G13170	AT2G42710	625749	618587	3702.AT4G13170.1	3702.AT2G42710.1	0	0	0	0	0	0.537	0	0	0.537
RACK1C_AT	Fes1A	621027	620046	3702.AT3G18130.1	3702.AT3G09350.1	0	0	0	0	0	0.537	0	0	0.537
SIGE	ATRPAC42	631019	612815	3702.AT5G24120.1	3702.AT1G60850.1	0	0	0	0	0	0.537	0	0	0.537
AT3G11964	AT1G25260	620332	610373	3702.AT3G11964.1	3702.AT1G25260.1	0	0	0	0	0	0.537	0	0	0.537
REBELOTE	AT3G18600	623753	621083	3702.AT3G55510.1	3702.AT3G18600.1	0	0	0	0	0	0.535	0	0	0.535
PDE340	REBELOTE	629536	623753	3702.AT5G08610.1	3702.AT3G55510.1	0	0	0	0	0	0.535	0	0	0.535
STRS2	REBELOTE	629537	623753	3702.AT5G08620.1	3702.AT3G55510.1	0	0	0	0	0	0.535	0	0	0.535
PHYD	ELF4	626135	618299	3702.AT4G16250.1	3702.AT2G40080.1	0	0	0	0	0	0.534	0	0	0.534
NAP57	NRPA2	623927	610798	3702.AT3G57150.1	3702.AT1G29940.1	0	0	0	0	0	0.534	0	0	0.534
SPA1	ELF4	618970	618299	3702.AT2G46340.1	3702.AT2G40080.1	0	0	0	0	0	0.534	0	0	0.534
NAP57	AT2G40360	623927	618335	3702.AT3G57150.1	3702.AT2G40360.1	0	0	0	0	0	0.534	0	0	0.534
NAP57	AT1G79150	623927	614735	3702.AT3G57150.1	3702.AT1G79150.1	0	0	0	0	0	0.534	0	0	0.534
AT5G15550	NAP57	630178	623927	3702.AT5G15550.1	3702.AT3G57150.1	0	0	0	0	0	0.534	0	0	0.534
TZP	ELF4	632439	618299	3702.AT5G43630.1	3702.AT2G40080.1	0	0	0	0	0	0.534	0	0	0.534
NAP57	EDA25	623927	614042	3702.AT3G57150.1	3702.AT1G72440.1	0	0	0	0	0	0.534	0	0	0.534
ELF4	PHYA	618299	608751	3702.AT2G40080.1	3702.AT1G09570.1	0	0	0	0	0	0.534	0	0	0.534
ELF4	PHYB	618299	616034	3702.AT2G40080.1	3702.AT2G18790.1	0	0	0	0	0	0.534	0	0	0.534
NAP57	AT3G13940	623927	620567	3702.AT3G57150.1	3702.AT3G13940.1	0	0	0	0	0	0.534	0	0	0.534
NAP57	AT1G63810	623927	613137	3702.AT3G57150.1	3702.AT1G63810.1	0	0	0	0	0	0.534	0	0	0.534
AT2G42710	EMB2785	618587	617322	3702.AT2G42710.1	3702.AT2G31060.3	0	0	0	0	0	0.533	0	0	0.533
NPR3	NIMIN1	632609	607995	3702.AT5G45110.1	3702.AT1G02450.1	0	0	0	0	0	0.532	0	0	0.532
AT4G13170	AT3G11964	625749	620332	3702.AT4G13170.1	3702.AT3G11964.1	0	0	0	0	0	0.531	0	0	0.531
ZAT7	OPR3	622751	615372	3702.AT3G46090.1	3702.AT2G06050.2	0	0	0	0	0	0.529	0	0	0.529
WRKY70	ZAT7	623849	622751	3702.AT3G56400.1	3702.AT3G46090.1	0	0	0	0	0	0.529	0	0	0.529
AT4G27130	ZAT7	627322	622751	3702.AT4G27130.1	3702.AT3G46090.1	0	0	0	0	0	0.529	0	0	0.529
AT5G08180	AT1G23280	629485	610202	3702.AT5G08180.2	3702.AT1G23280.1	0	0	0	0	0	0.529	0	0	0.529
ASN2	Fes1A	634754	620046	3702.AT5G65010.2	3702.AT3G09350.1	0	0	0	0	0	0.527	0	0	0.527
ASN1	Fes1A	622874	620046	3702.AT3G47340.1	3702.AT3G09350.1	0	0	0	0	0	0.527	0	0	0.527
AT3G58660	REBELOTE	624079	623753	3702.AT3G58660.1	3702.AT3G55510.1	0	0	0	0	0	0.525	0	0	0.525
AT3G57490	RPL3P	623961	620955	3702.AT3G57490.1	3702.AT3G17465.1	0	0	0	0	0	0.524	0	0	0.524
JAZ1	JAZ5	609771	609591	3702.AT1G19180.1	3702.AT1G17380.1	0	0	0	0.73	0	0.523	0	0	0.523
NF-YA5	LEC1	612310	610060	3702.AT1G54160.1	3702.AT1G21970.1	0	0	0	0	0	0.523	0	0	0.523
TIFY7	JAZ1	613869	609771	3702.AT1G70700.1	3702.AT1G19180.1	0	0	0	0.611	0	0.523	0	0	0.523
MPK3	RACK1C_AT	622703	621027	3702.AT3G45640.1	3702.AT3G18130.1	0	0	0	0	0	0.522	0	0	0.522
SGT1A	ROC4	626937	624438	3702.AT4G23570.3	3702.AT3G62030.2	0	0	0	0	0	0.522	0	0	0.522
ROC1	SGT1A	628579	626937	3702.AT4G38740.1	3702.AT4G23570.3	0	0	0	0	0	0.522	0	0	0.522
AT4G04940	AT1G50920	625105	611953	3702.AT4G04940.1	3702.AT1G50920.1	0	0	0	0	0	0.519	0	0	0.519
ORP2A	AT1G51270	626823	611990	3702.AT4G22540.1	3702.AT1G51270.3	0	0	0	0	0	0.519	0	0	0.519
BBX32	COL2	621357	619324	3702.AT3G21150.1	3702.AT3G02380.1	0	0	0	0.615	0	0.516	0	0	0.516
AIB	TIFY7	618992	613869	3702.AT2G46510.1	3702.AT1G70700.1	0	0	0	0	0	0.515	0	0	0.515
AT3G58660	RPL3B	624079	612904	3702.AT3G58660.1	3702.AT1G61580.1	0	0	0	0	0	0.515	0	0	0.515
AIB	JAZ1	618992	609771	3702.AT2G46510.1	3702.AT1G19180.1	0	0	0	0	0	0.515	0	0	0.515
AIB	JAZ5	618992	609591	3702.AT2G46510.1	3702.AT1G17380.1	0	0	0	0	0	0.515	0	0	0.515
AT4G13170	PUM24	625749	620884	3702.AT4G13170.1	3702.AT3G16810.1	0	0	0	0	0	0.515	0	0	0.515
MORF1	RIP1	626556	620683	3702.AT4G20020.1	3702.AT3G15000.1	0	0	0	0.671	0	0.512	0	0	0.512
AT3G11964	AT2G42710	620332	618587	3702.AT3G11964.1	3702.AT2G42710.1	0	0	0	0	0	0.512	0	0	0.512
GRF11	HDA08	611259	608635	3702.AT1G34760.1	3702.AT1G08460.1	0	0	0	0	0	0.511	0	0	0.511
AT5G08600	NAP57	629535	623927	3702.AT5G08600.2	3702.AT3G57150.1	0	0	0	0	0	0.51	0	0	0.51
STRS2	AT4G04940	629537	625105	3702.AT5G08620.1	3702.AT4G04940.1	0	0	0	0	0	0.508	0	0	0.508
AT3G57490	EMB2785	623961	617322	3702.AT3G57490.1	3702.AT2G31060.3	0	0	0	0	0	0.508	0	0	0.508
AT4G04940	AT3G18600	625105	621083	3702.AT4G04940.1	3702.AT3G18600.1	0	0	0	0	0	0.508	0	0	0.508
PDE340	AT4G04940	629536	625105	3702.AT5G08610.1	3702.AT4G04940.1	0	0	0	0	0	0.508	0	0	0.508
RPL3P	AT1G29320	620955	610735	3702.AT3G17465.1	3702.AT1G29320.1	0	0	0	0	0	0.506	0	0	0.506
AT1G80440	ABCG36	614860	612729	3702.AT1G80440.1	3702.AT1G59870.1	0	0	0	0	0	0.504	0	0	0.504
AT2G46600	ABCG36	619003	612729	3702.AT2G46600.1	3702.AT1G59870.1	0	0	0	0	0	0.504	0	0	0.504
FSD1	POLGAMMA1	627100	621293	3702.AT4G25100.1	3702.AT3G20540.2	0	0	0	0	0	0.504	0	0	0.504
TCH3	ABCG36	618418	612729	3702.AT2G41100.4	3702.AT1G59870.1	0	0	0	0	0	0.504	0	0	0.504
AT5G08180	AT2G40360	629485	618335	3702.AT5G08180.2	3702.AT2G40360.1	0	0	0	0	0	0.501	0	0	0.501
DREB2A	IGMT4	629195	609970	3702.AT5G05410.1	3702.AT1G21130.1	0	0	0	0	0	0.5	0	0	0.499
SIGF	NRPA2	617973	610798	3702.AT2G36990.1	3702.AT1G29940.1	0	0	0	0	0	0.5	0	0	0.499
AT5G08180	RPL3P	629485	620955	3702.AT5G08180.2	3702.AT3G17465.1	0	0	0	0	0	0.5	0	0	0.499
AT5G08180	AT3G57940	629485	624006	3702.AT5G08180.2	3702.AT3G57940.1	0	0	0	0	0	0.499	0	0	0.499
AT5G08180	RPL3B	629485	612904	3702.AT5G08180.2	3702.AT1G61580.1	0	0	0	0	0	0.5	0	0	0.499
AT5G15750	AT5G08180	630199	629485	3702.AT5G15750.1	3702.AT5G08180.2	0	0	0	0	0	0.5	0	0	0.499
NRPA2	SIG2	610798	608644	3702.AT1G29940.1	3702.AT1G08540.1	0	0	0	0	0	0.5	0	0	0.499
AT5G08180	AT2G18900	629485	616045	3702.AT5G08180.2	3702.AT2G18900.1	0	0	0	0	0	0.499	0	0	0.499
SIGE	NRPA2	631019	610798	3702.AT5G24120.1	3702.AT1G29940.1	0	0	0	0	0	0.5	0	0	0.499
HY5	BBX16	629775	614190	3702.AT5G11260.1	3702.AT1G73870.1	0	0	0	0	0	0.496	0	0	0.496
AT5G27395	AT4G13170	631342	625749	3702.AT5G27395.1	3702.AT4G13170.1	0	0	0	0	0	0.493	0	0	0.493
HY5	BHLH101	629775	629065	3702.AT5G11260.1	3702.AT5G04150.1	0	0	0	0	0	0.492	0	0	0.491
HY5	GBF2	629775	624734	3702.AT5G11260.1	3702.AT4G01120.1	0	0	0	0	0	0.492	0	0	0.491
HY5	PYE	629775	622906	3702.AT5G11260.1	3702.AT3G47640.2	0	0	0	0	0	0.492	0	0	0.491
AT5G48560	HY5	632984	629775	3702.AT5G48560.1	3702.AT5G11260.1	0	0	0	0	0	0.492	0	0	0.491
AT5G25450	dNK	631165	614000	3702.AT5G25450.1	3702.AT1G72040.1	0	0	0	0	0	0.489	0	0	0.489
AT3G57490	PRMT1A	623961	616123	3702.AT3G57490.1	3702.AT2G19670.1	0	0	0	0	0	0.49	0	0	0.489
PRMT11	AT3G57490	627583	623961	3702.AT4G29510.1	3702.AT3G57490.1	0	0	0	0	0	0.49	0	0	0.489
AT3G57490	PRMT3	623961	620365	3702.AT3G57490.1	3702.AT3G12270.1	0	0	0	0	0	0.49	0	0	0.489
STRS2	AT1G63810	629537	613137	3702.AT5G08620.1	3702.AT1G63810.1	0	0	0	0	0	0.488	0	0	0.487
RGL1	PAP3	613410	609314	3702.AT1G66350.1	3702.AT1G14700.1	0	0	0	0	0	0.488	0	0	0.487
PDE340	AT1G63810	629536	613137	3702.AT5G08610.1	3702.AT1G63810.1	0	0	0	0	0	0.488	0	0	0.487
AT3G18600	AT1G63810	621083	613137	3702.AT3G18600.1	3702.AT1G63810.1	0	0	0	0	0	0.488	0	0	0.487
HAG1	NUDT6	623657	615258	3702.AT3G54610.1	3702.AT2G04450.1	0	0	0	0	0	0.483	0	0	0.483
AT3G58660	AT1G50920	624079	611953	3702.AT3G58660.1	3702.AT1G50920.1	0	0	0	0	0	0.484	0	0	0.483
AT2G41250	AT2G30600	618436	617270	3702.AT2G41250.1	3702.AT2G30600.5	0	0	0	0	0	0.481	0	0	0.481
LHCB4.2	LHB1B1	620000	617694	3702.AT3G08940.2	3702.AT2G34430.1	0	0	0	0.772	0	0.481	0	0	0.481
AT5G08180	MEE49	629485	624780	3702.AT5G08180.2	3702.AT4G01560.1	0	0	0	0	0	0.479	0	0	0.479
RPL3P	Fes1A	620955	620046	3702.AT3G17465.1	3702.AT3G09350.1	0	0	0	0	0	0.479	0	0	0.479
AT5G15750	Fes1A	630199	620046	3702.AT5G15750.1	3702.AT3G09350.1	0	0	0	0	0	0.479	0	0	0.479
AT1G72820	AT1G16350	614080	609484	3702.AT1G72820.1	3702.AT1G16350.1	0	0	0	0	0	0.479	0	0	0.479
AT3G57490	ATRPAC42	623961	612815	3702.AT3G57490.1	3702.AT1G60850.1	0	0	0	0	0	0.479	0	0	0.479
Fes1A	RPL3B	620046	612904	3702.AT3G09350.1	3702.AT1G61580.1	0	0	0	0	0	0.479	0	0	0.479
AT3G57490	AT2G42710	623961	618587	3702.AT3G57490.1	3702.AT2G42710.1	0	0	0	0	0	0.479	0	0	0.479
AT2G34357	NOP56	617686	612513	3702.AT2G34357.1	3702.AT1G56110.1	0	0	0	0	0	0.478	0	0	0.478
AT5G25450	AO	631165	630099	3702.AT5G25450.1	3702.AT5G14760.1	0	0	0	0	0	0.477	0	0	0.477
AT5G54910	STRS2	633677	629537	3702.AT5G54910.1	3702.AT5G08620.1	0	0	0	0.747	0	0.476	0	0	0.476
AT5G54910	PDE340	633677	629536	3702.AT5G54910.1	3702.AT5G08610.1	0	0	0	0.671	0	0.476	0	0	0.476
STRS2	AT1G06720	629537	608446	3702.AT5G08620.1	3702.AT1G06720.1	0	0	0	0	0	0.476	0	0	0.476
AT5G54910	AT3G18600	633677	621083	3702.AT5G54910.1	3702.AT3G18600.1	0	0	0	0.844	0	0.476	0	0	0.476
PDE340	AT1G06720	629536	608446	3702.AT5G08610.1	3702.AT1G06720.1	0	0	0	0	0	0.476	0	0	0.476
AT3G18600	AT1G06720	621083	608446	3702.AT3G18600.1	3702.AT1G06720.1	0	0	0	0	0	0.476	0	0	0.476
Fes1A	EMB2785	620046	617322	3702.AT3G09350.1	3702.AT2G31060.3	0	0	0	0	0	0.475	0	0	0.475
AT5G08180	AT3G58660	629485	624079	3702.AT5G08180.2	3702.AT3G58660.1	0	0	0	0	0	0.474	0	0	0.474
RPL3B	AT1G06720	612904	608446	3702.AT1G61580.1	3702.AT1G06720.1	0	0	0	0	0	0.473	0	0	0.473
AT2G37990	AT1G79150	618078	614735	3702.AT2G37990.1	3702.AT1G79150.1	0	0	0	0	0	0.473	0	0	0.473
AT5G54910	NAP57	633677	623927	3702.AT5G54910.1	3702.AT3G57150.1	0	0	0	0	0	0.473	0	0	0.473
AT4G13170	AT3G15460	625749	620738	3702.AT4G13170.1	3702.AT3G15460.1	0	0	0	0	0	0.473	0	0	0.473
AT4G13170	AT1G52930	625749	612167	3702.AT4G13170.1	3702.AT1G52930.1	0	0	0	0	0	0.473	0	0	0.473
AT5G08180	AT2G42710	629485	618587	3702.AT5G08180.2	3702.AT2G42710.1	0	0	0	0	0	0.472	0	0	0.472
AT3G58660	AT3G09720	624079	620081	3702.AT3G58660.1	3702.AT3G09720.1	0	0	0	0	0	0.472	0	0	0.472
TRXF1	PFT1	619363	610405	3702.AT3G02730.1	3702.AT1G25540.1	0	0	0	0	0	0.472	0	0	0.472
AT5G54940	AT5G08180	633680	629485	3702.AT5G54940.1	3702.AT5G08180.2	0	0	0	0	0	0.472	0	0	0.472
TRXF2	PFT1	630269	610405	3702.AT5G16400.1	3702.AT1G25540.1	0	0	0	0	0	0.472	0	0	0.472
AT5G08180	AT4G27130	629485	627322	3702.AT5G08180.2	3702.AT4G27130.1	0	0	0	0	0	0.472	0	0	0.472
AT4G33920	AT3G12830	628065	620422	3702.AT4G33920.1	3702.AT3G12830.1	0	0	0	0	0	0.471	0	0	0.471
LHCA4	LHB1B1	622888	617694	3702.AT3G47470.1	3702.AT2G34430.1	0	0	0	0.774	0	0.47	0	0	0.47
LHB1B1	PSAF	617694	610943	3702.AT2G34430.1	3702.AT1G31330.1	0	0	0	0	0	0.47	0	0	0.47
BIP2	DER1	632249	627566	3702.AT5G42020.1	3702.AT4G29330.1	0	0	0	0	0	0.469	0	0	0.469
AT3G57490	AT1G25260	623961	610373	3702.AT3G57490.1	3702.AT1G25260.1	0	0	0	0	0	0.469	0	0	0.469
AT5G08600	AT5G08180	629535	629485	3702.AT5G08600.2	3702.AT5G08180.2	0	0	0	0	0	0.468	0	0	0.468
AT3G58660	EDA25	624079	614042	3702.AT3G58660.1	3702.AT1G72440.1	0	0	0	0	0	0.467	0	0	0.467
AT5G35735	AT3G57490	631613	623961	3702.AT5G35735.1	3702.AT3G57490.1	0	0	0	0	0	0.467	0	0	0.467
AT5G15750	NRPA2	630199	610798	3702.AT5G15750.1	3702.AT1G29940.1	0	0	0	0	0	0.467	0	0	0.467
AT4G16630	AT1G79150	626179	614735	3702.AT4G16630.1	3702.AT1G79150.1	0	0	0	0	0	0.467	0	0	0.467
ASN1	AT1G29880	622874	610792	3702.AT3G47340.1	3702.AT1G29880.1	0	0	0	0	0	0.467	0	0	0.467
Fes1A	AT2G42710	620046	618587	3702.AT3G09350.1	3702.AT2G42710.1	0	0	0	0	0	0.467	0	0	0.467
ASN2	AT1G29880	634754	610792	3702.AT5G65010.2	3702.AT1G29880.1	0	0	0	0	0	0.467	0	0	0.467
AT4G12980	AT3G57490	625730	623961	3702.AT4G12980.1	3702.AT3G57490.1	0	0	0	0	0	0.467	0	0	0.467
STRS2	NAP57	629537	623927	3702.AT5G08620.1	3702.AT3G57150.1	0	0	0	0	0	0.466	0	0	0.465
AT5G12110	GSTF8	629864	619119	3702.AT5G12110.1	3702.AT2G47730.1	0	0	0	0	0	0.465	0	0	0.465
AT5G12110	GSTF6	629864	608044	3702.AT5G12110.1	3702.AT1G02930.1	0	0	0	0	0	0.465	0	0	0.465
AT3G13940	NOP56	620567	612513	3702.AT3G13940.1	3702.AT1G56110.1	0	0	0	0	0	0.466	0	0	0.465
AT5G08180	AT1G25260	629485	610373	3702.AT5G08180.2	3702.AT1G25260.1	0	0	0	0	0	0.465	0	0	0.465
PDE340	NAP57	629536	623927	3702.AT5G08610.1	3702.AT3G57150.1	0	0	0	0	0	0.466	0	0	0.465
AT5G12110	GSTF5	629864	608045	3702.AT5G12110.1	3702.AT1G02940.1	0	0	0	0	0	0.465	0	0	0.465
NAP57	AT3G18600	623927	621083	3702.AT3G57150.1	3702.AT3G18600.1	0	0	0	0	0	0.466	0	0	0.465
AT5G08180	AT4G13170	629485	625749	3702.AT5G08180.2	3702.AT4G13170.1	0	0	0	0	0	0.465	0	0	0.465
AT5G12110	GSTF7	629864	608043	3702.AT5G12110.1	3702.AT1G02920.1	0	0	0	0	0	0.465	0	0	0.465
FLN2	PFT1	613713	610405	3702.AT1G69200.1	3702.AT1G25540.1	0	0	0	0	0	0.463	0	0	0.463
PFT1	AT1G06030	610405	608374	3702.AT1G25540.1	3702.AT1G06030.1	0	0	0	0	0	0.463	0	0	0.463
NAP57	AT2G34357	623927	617686	3702.AT3G57150.1	3702.AT2G34357.1	0	0	0	0	0	0.463	0	0	0.463
AT4G15420	AT1G79150	626032	614735	3702.AT4G15420.1	3702.AT1G79150.1	0	0	0	0	0	0.463	0	0	0.463
ORG1	CYCH;1	633513	631364	3702.AT5G53450.1	3702.AT5G27620.1	0	0	0	0	0	0.464	0	0	0.463
RH39	NOP56	625383	612513	3702.AT4G09730.1	3702.AT1G56110.1	0	0	0	0	0	0.464	0	0	0.463
AT1G25260	AT1G06720	610373	608446	3702.AT1G25260.1	3702.AT1G06720.1	0	0	0	0	0	0.462	0	0	0.461
RACK1C_AT	MKK4	621027	612032	3702.AT3G18130.1	3702.AT1G51660.1	0	0	0	0	0	0.457	0	0	0.457
CYCH;1	NOP56	631364	612513	3702.AT5G27620.1	3702.AT1G56110.1	0	0	0	0	0	0.452	0	0	0.452
SAL1	PIN3	634640	613894	3702.AT5G63980.1	3702.AT1G70940.1	0	0	0	0	0	0.45	0	0	0.45
RPL3P	AT2G40360	620955	618335	3702.AT3G17465.1	3702.AT2G40360.1	0	0	0	0	0	0.445	0	0	0.445
AT5G08180	REBELOTE	629485	623753	3702.AT5G08180.2	3702.AT3G55510.1	0	0	0	0	0	0.434	0	0	0.434
Fes1A	AT1G29880	620046	610792	3702.AT3G09350.1	3702.AT1G29880.1	0	0	0	0	0	0.427	0	0	0.426
HAG1	HDA08	623657	608635	3702.AT3G54610.1	3702.AT1G08460.1	0	0	0	0	0	0.425	0	0	0.424
AT4G13170	AT1G50920	625749	611953	3702.AT4G13170.1	3702.AT1G50920.1	0	0	0	0	0	0.423	0	0	0.422
AT5G08180	AT2G37990	629485	618078	3702.AT5G08180.2	3702.AT2G37990.1	0	0	0	0	0	0.422	0	0	0.422
AT4G13170	Fes1A	625749	620046	3702.AT4G13170.1	3702.AT3G09350.1	0	0	0	0	0	0.421	0	0	0.42
Fes1A	AT1G25260	620046	610373	3702.AT3G09350.1	3702.AT1G25260.1	0	0	0	0	0	0.421	0	0	0.42
AT5G14520	NOP56	630075	612513	3702.AT5G14520.1	3702.AT1G56110.1	0	0	0	0	0	0.419	0	0	0.418
HSP70T-2	Hsp70-15	617441	614810	3702.AT2G32120.1	3702.AT1G79920.1	0	0	0	0.591	0	0.416	0	0	0.416
AT2G35040	MIPS2	617758	616402	3702.AT2G35040.1	3702.AT2G22240.1	0	0	0	0	0	0.414	0	0	0.414
AT5G08180	NOP56	629485	612513	3702.AT5G08180.2	3702.AT1G56110.1	0	0	0	0	0	0.406	0	0	0.406
PUM24	AT1G29320	620884	610735	3702.AT3G16810.1	3702.AT1G29320.1	0	0	0	0	0	0.401	0	0	0.4
AT5G15550	PUM24	630178	620884	3702.AT5G15550.1	3702.AT3G16810.1	0	0	0	0	0	0.401	0	0	0.4
AT3G11964	Fes1A	620332	620046	3702.AT3G11964.1	3702.AT3G09350.1	0	0	0	0	0	0.401	0	0	0.4
DER1	AT4G15420	627566	626032	3702.AT4G29330.1	3702.AT4G15420.1	0	0	0	0	0	0.401	0	0	0.4
