# Supplementary material for: Transcriptomic Data Meta-Analysis Sheds Light on High Light Response in Arabidopsis thaliana L
Source: Int J Mol Sci. 2022 Apr 18;23(8):4455. doi: 10.3390/ijms23084455 (PMC9026532; doi:10.3390/ijms23084455)
Supplement: Supplementary file 1 [file ijms-23-04455-s001.zip › S9.xlsx]

## Sheet: Лист1
Table S9
Identified enriched processes and their metaterm groups in the set of 1151 DEGs
name of term	metaterm	Enrichment FDR	nGenes	Pathway Genes	Fold Enrichment	URL	genes involved
Aromatic_compound_biosynthetic_process	transription_regulation	3.14e-07	197	3242	1.47	GO:0019438	AT1G01060 AT1G01520 AT1G01720 AT1G02450 AT1G03850 AT1G06180 AT1G07050 AT1G09250 AT1G09570 AT1G09932 AT1G11790 AT1G12780 AT1G16350 AT1G18330 AT1G18570 AT1G19000 AT1G19050 AT1G19330 AT1G19350 AT1G19490 AT1G20640 AT1G21120 AT1G21130 AT1G22190 AT1G22770 AT1G25440 AT1G25550 AT1G26790 AT1G27045 AT1G27730 AT1G28370 AT1G29880 AT1G29940 AT1G42990 AT1G44446 AT1G49130 AT1G51140 AT1G52880 AT1G52890 AT1G60850…
Cellular_nitrogen_compound_biosynthetic_process	transription_regulation	6.74e-05	220	4002	1.33	GO:0044271	AT1G01060 AT1G01520 AT1G01720 AT1G02450 AT1G03360 AT1G03850 AT1G06180 AT1G07050 AT1G09250 AT1G09570 AT1G09932 AT1G12780 AT1G14205 AT1G15870 AT1G16350 AT1G16720 AT1G18330 AT1G18570 AT1G19000 AT1G19050 AT1G19330 AT1G19350 AT1G19490 AT1G20640 AT1G22190 AT1G22770 AT1G23820 AT1G25440 AT1G25550 AT1G26790 AT1G27045 AT1G27730 AT1G28370 AT1G29880 AT1G29940 AT1G42990 AT1G44446 AT1G48920 AT1G49130 AT1G49500…
Gene_expression	transription_regulation	1.43e-05	249	4534	1.33	GO:0010467	AT1G01060 AT1G01520 AT1G01720 AT1G02450 AT1G03360 AT1G03850 AT1G04530 AT1G06180 AT1G06720 AT1G07050 AT1G07350 AT1G09250 AT1G09570 AT1G10522 AT1G12780 AT1G14205 AT1G15440 AT1G15870 AT1G16720 AT1G18330 AT1G18570 AT1G19000 AT1G19050 AT1G19330 AT1G19350 AT1G19490 AT1G20640 AT1G22190 AT1G22770 AT1G23280 AT1G25260 AT1G25440 AT1G25550 AT1G26790 AT1G27045 AT1G27730 AT1G28370 AT1G29880 AT1G29940 AT1G31660…
Heterocycle_biosynthetic_process	transription_regulation	3.5e-06	189	3189	1.43	GO:0018130	AT1G01060 AT1G01520 AT1G01720 AT1G02450 AT1G03850 AT1G06180 AT1G07050 AT1G09250 AT1G09570 AT1G09932 AT1G12780 AT1G14520 AT1G16350 AT1G18330 AT1G18570 AT1G19000 AT1G19050 AT1G19250 AT1G19330 AT1G19350 AT1G19490 AT1G20640 AT1G22190 AT1G22770 AT1G25440 AT1G25550 AT1G26790 AT1G27045 AT1G27730 AT1G28370 AT1G29880 AT1G29940 AT1G42990 AT1G44446 AT1G49130 AT1G51140 AT1G52880 AT1G52890 AT1G60850 AT1G63660…
Nucleic_acid-templated_transcription	transription_regulation	5.79e-07	162	2563	1.53	GO:0097659	AT1G01060 AT1G01520 AT1G01720 AT1G02450 AT1G03850 AT1G06180 AT1G07050 AT1G09250 AT1G09570 AT1G18330 AT1G18570 AT1G19000 AT1G19050 AT1G19330 AT1G19350 AT1G19490 AT1G20640 AT1G22190 AT1G22770 AT1G25440 AT1G25550 AT1G26790 AT1G27045 AT1G27730 AT1G28370 AT1G29940 AT1G42990 AT1G49130 AT1G51140 AT1G52880 AT1G52890 AT1G60850 AT1G66230 AT1G66350 AT1G66500 AT1G67970 AT1G68190 AT1G68520 AT1G68840 AT1G69200…
Nucleic_acid_metabolic_process	transription_regulation	0.000272	237	4464	1.28	GO:0090304	AT1G01060 AT1G01520 AT1G01720 AT1G02450 AT1G03360 AT1G03850 AT1G04530 AT1G06180 AT1G06720 AT1G07050 AT1G07350 AT1G09250 AT1G09570 AT1G12780 AT1G15440 AT1G15510 AT1G18330 AT1G18570 AT1G19000 AT1G19050 AT1G19330 AT1G19350 AT1G19490 AT1G20640 AT1G22190 AT1G22770 AT1G23280 AT1G25260 AT1G25360 AT1G25440 AT1G25550 AT1G26790 AT1G27045 AT1G27730 AT1G28370 AT1G29880 AT1G29940 AT1G31660 AT1G42990 AT1G48920…
Nucleobase-containing_compound_biosynthetic_process	transription_regulation	4.32e-06	177	2952	1.45	GO:0034654	AT1G01060 AT1G01520 AT1G01720 AT1G02450 AT1G03850 AT1G06180 AT1G07050 AT1G09250 AT1G09570 AT1G12780 AT1G16350 AT1G18330 AT1G18570 AT1G19000 AT1G19050 AT1G19330 AT1G19350 AT1G19490 AT1G20640 AT1G22190 AT1G22770 AT1G25440 AT1G25550 AT1G26790 AT1G27045 AT1G27730 AT1G28370 AT1G29880 AT1G29940 AT1G42990 AT1G49130 AT1G51140 AT1G52880 AT1G52890 AT1G60850 AT1G63660 AT1G66230 AT1G66350 AT1G66500 AT1G67970…
Nucleobase-containing_compound_metabolic_process	transription_regulation	0.00029	255	4864	1.27	GO:0006139	AT1G01060 AT1G01520 AT1G01720 AT1G02450 AT1G03360 AT1G03850 AT1G04530 AT1G06180 AT1G06720 AT1G07050 AT1G07350 AT1G09250 AT1G09570 AT1G12780 AT1G14250 AT1G15440 AT1G15510 AT1G16350 AT1G18330 AT1G18570 AT1G19000 AT1G19050 AT1G19330 AT1G19350 AT1G19490 AT1G20640 AT1G22190 AT1G22770 AT1G23280 AT1G25260 AT1G25360 AT1G25440 AT1G25550 AT1G26790 AT1G27045 AT1G27730 AT1G28370 AT1G29880 AT1G29940 AT1G31660…
Organic_cyclic_compound_biosynthetic_process	transription_regulation	1.79e-06	200	3385	1.43	GO:1901362	AT1G01060 AT1G01520 AT1G01720 AT1G02205 AT1G02450 AT1G03850 AT1G06180 AT1G07050 AT1G09250 AT1G09570 AT1G09932 AT1G11790 AT1G12780 AT1G14520 AT1G16350 AT1G18330 AT1G18570 AT1G19000 AT1G19050 AT1G19250 AT1G19330 AT1G19350 AT1G19490 AT1G20640 AT1G22190 AT1G22770 AT1G25440 AT1G25550 AT1G26790 AT1G27045 AT1G27730 AT1G28370 AT1G29880 AT1G29940 AT1G42990 AT1G44446 AT1G49130 AT1G51140 AT1G52880 AT1G52890…
RNA_biosynthetic_process	transription_regulation	1.13e-06	162	2590	1.51	GO:0032774	AT1G01060 AT1G01520 AT1G01720 AT1G02450 AT1G03850 AT1G06180 AT1G07050 AT1G09250 AT1G09570 AT1G18330 AT1G18570 AT1G19000 AT1G19050 AT1G19330 AT1G19350 AT1G19490 AT1G20640 AT1G22190 AT1G22770 AT1G25440 AT1G25550 AT1G26790 AT1G27045 AT1G27730 AT1G28370 AT1G29940 AT1G42990 AT1G49130 AT1G51140 AT1G52880 AT1G52890 AT1G60850 AT1G66230 AT1G66350 AT1G66500 AT1G67970 AT1G68190 AT1G68520 AT1G68840 AT1G69200…
RNA_metabolic_process	transription_regulation	1.21e-06	225	3888	1.4	GO:0016070	AT1G01060 AT1G01520 AT1G01720 AT1G02450 AT1G03360 AT1G03850 AT1G04530 AT1G06180 AT1G06720 AT1G07050 AT1G07350 AT1G09250 AT1G09570 AT1G12780 AT1G15440 AT1G15510 AT1G18330 AT1G18570 AT1G19000 AT1G19050 AT1G19330 AT1G19350 AT1G19490 AT1G20640 AT1G22190 AT1G22770 AT1G23280 AT1G25260 AT1G25360 AT1G25440 AT1G25550 AT1G26790 AT1G27045 AT1G27730 AT1G28370 AT1G29880 AT1G29940 AT1G31660 AT1G42990 AT1G48920…
Regulation_of_RNA_biosynthetic_process	transription_regulation	2.1e-07	155	2383	1.57	GO:2001141	AT1G01060 AT1G01520 AT1G01720 AT1G02450 AT1G03850 AT1G06180 AT1G07050 AT1G09250 AT1G09570 AT1G18330 AT1G18570 AT1G19000 AT1G19050 AT1G19330 AT1G19350 AT1G19490 AT1G20640 AT1G22190 AT1G22770 AT1G25440 AT1G25550 AT1G26790 AT1G27045 AT1G27730 AT1G28370 AT1G42990 AT1G49130 AT1G51140 AT1G52880 AT1G52890 AT1G66230 AT1G66350 AT1G67970 AT1G68190 AT1G68520 AT1G68840 AT1G69200 AT1G69260 AT1G69490 AT1G70000…
Regulation_of_RNA_metabolic_process	transription_regulation	2.92e-07	161	2514	1.55	GO:0051252	AT1G01060 AT1G01520 AT1G01720 AT1G02450 AT1G03360 AT1G03850 AT1G06180 AT1G07050 AT1G07350 AT1G09250 AT1G09570 AT1G18330 AT1G18570 AT1G19000 AT1G19050 AT1G19330 AT1G19350 AT1G19490 AT1G20640 AT1G22190 AT1G22770 AT1G25440 AT1G25550 AT1G26790 AT1G27045 AT1G27730 AT1G28370 AT1G42990 AT1G49130 AT1G51140 AT1G52880 AT1G52890 AT1G66230 AT1G66350 AT1G67970 AT1G68190 AT1G68520 AT1G68840 AT1G69200 AT1G69260…
Regulation_of_biosynthetic_process	transription_regulation	1.07e-07	177	2787	1.54	GO:0009889	AT1G01060 AT1G01520 AT1G01720 AT1G02450 AT1G03360 AT1G03850 AT1G04770 AT1G06180 AT1G07050 AT1G09250 AT1G09570 AT1G15870 AT1G18330 AT1G18570 AT1G19000 AT1G19050 AT1G19330 AT1G19350 AT1G19490 AT1G20640 AT1G22190 AT1G22770 AT1G25440 AT1G25550 AT1G26790 AT1G27045 AT1G27730 AT1G28370 AT1G42990 AT1G49130 AT1G49760 AT1G51140 AT1G52880 AT1G52890 AT1G66230 AT1G66350 AT1G67970 AT1G68190 AT1G68520 AT1G68840…
Regulation_of_cellular_biosynthetic_process	transription_regulation	1.47e-07	175	2761	1.53	GO:0031326	AT1G01060 AT1G01520 AT1G01720 AT1G02450 AT1G03360 AT1G03850 AT1G04770 AT1G06180 AT1G07050 AT1G09250 AT1G09570 AT1G15870 AT1G18330 AT1G18570 AT1G19000 AT1G19050 AT1G19330 AT1G19350 AT1G19490 AT1G20640 AT1G22190 AT1G22770 AT1G25440 AT1G25550 AT1G26790 AT1G27045 AT1G27730 AT1G28370 AT1G42990 AT1G49130 AT1G49760 AT1G51140 AT1G52880 AT1G52890 AT1G66230 AT1G66350 AT1G67970 AT1G68190 AT1G68520 AT1G68840…
Regulation_of_cellular_macromolecule_biosynthetic_process	transription_regulation	4.04e-07	168	2667	1.52	GO:2000112	AT1G01060 AT1G01520 AT1G01720 AT1G02450 AT1G03360 AT1G03850 AT1G06180 AT1G07050 AT1G09250 AT1G09570 AT1G15870 AT1G18330 AT1G18570 AT1G19000 AT1G19050 AT1G19330 AT1G19350 AT1G19490 AT1G20640 AT1G22190 AT1G22770 AT1G25440 AT1G25550 AT1G26790 AT1G27045 AT1G27730 AT1G28370 AT1G42990 AT1G49130 AT1G49760 AT1G51140 AT1G52880 AT1G52890 AT1G66230 AT1G66350 AT1G67970 AT1G68190 AT1G68520 AT1G68840 AT1G69200…
Regulation_of_cellular_metabolic_process	transription_regulation	3.91e-05	191	3354	1.38	GO:0031323	AT1G01060 AT1G01520 AT1G01720 AT1G02450 AT1G03360 AT1G03850 AT1G04770 AT1G06180 AT1G07050 AT1G07350 AT1G09250 AT1G09570 AT1G15870 AT1G18330 AT1G18570 AT1G19000 AT1G19050 AT1G19330 AT1G19350 AT1G19490 AT1G20640 AT1G22190 AT1G22770 AT1G25440 AT1G25550 AT1G26790 AT1G27045 AT1G27730 AT1G28370 AT1G42990 AT1G49130 AT1G49760 AT1G51140 AT1G52880 AT1G52890 AT1G61800 AT1G66230 AT1G66350 AT1G67970 AT1G68190…
Regulation_of_gene_expression	transription_regulation	6e-06	178	2988	1.44	GO:0010468	AT1G01060 AT1G01520 AT1G01720 AT1G02450 AT1G03360 AT1G03850 AT1G06180 AT1G07050 AT1G07350 AT1G09250 AT1G09570 AT1G10522 AT1G15870 AT1G18330 AT1G18570 AT1G19000 AT1G19050 AT1G19330 AT1G19350 AT1G19490 AT1G20640 AT1G22190 AT1G22770 AT1G25260 AT1G25440 AT1G25550 AT1G26790 AT1G27045 AT1G27730 AT1G28370 AT1G42990 AT1G49130 AT1G49760 AT1G51140 AT1G52880 AT1G52890 AT1G66230 AT1G66350 AT1G67970 AT1G68190…
Regulation_of_macromolecule_biosynthetic_process	transription_regulation	4.95e-07	168	2676	1.52	GO:0010556	AT1G01060 AT1G01520 AT1G01720 AT1G02450 AT1G03360 AT1G03850 AT1G06180 AT1G07050 AT1G09250 AT1G09570 AT1G15870 AT1G18330 AT1G18570 AT1G19000 AT1G19050 AT1G19330 AT1G19350 AT1G19490 AT1G20640 AT1G22190 AT1G22770 AT1G25440 AT1G25550 AT1G26790 AT1G27045 AT1G27730 AT1G28370 AT1G42990 AT1G49130 AT1G49760 AT1G51140 AT1G52880 AT1G52890 AT1G66230 AT1G66350 AT1G67970 AT1G68190 AT1G68520 AT1G68840 AT1G69200…
Regulation_of_macromolecule_metabolic_process	transription_regulation	0.00231	183	3445	1.29	GO:0060255	AT1G01060 AT1G01520 AT1G01720 AT1G02450 AT1G03360 AT1G03850 AT1G06180 AT1G07050 AT1G07350 AT1G09250 AT1G09570 AT1G10522 AT1G15870 AT1G18330 AT1G18570 AT1G19000 AT1G19050 AT1G19330 AT1G19350 AT1G19490 AT1G20640 AT1G22190 AT1G22770 AT1G25260 AT1G25440 AT1G25550 AT1G26790 AT1G27045 AT1G27730 AT1G28370 AT1G42990 AT1G49130 AT1G49760 AT1G51140 AT1G52880 AT1G52890 AT1G66230 AT1G66350 AT1G67970 AT1G68190…
Regulation_of_metabolic_process	transription_regulation	0.000222	202	3691	1.32	GO:0019222	AT1G01060 AT1G01520 AT1G01720 AT1G02450 AT1G03360 AT1G03850 AT1G04770 AT1G06180 AT1G07050 AT1G07350 AT1G09250 AT1G09570 AT1G10522 AT1G15870 AT1G18330 AT1G18570 AT1G19000 AT1G19050 AT1G19330 AT1G19350 AT1G19490 AT1G20640 AT1G22190 AT1G22770 AT1G25260 AT1G25440 AT1G25550 AT1G26790 AT1G27045 AT1G27730 AT1G28370 AT1G42990 AT1G49130 AT1G49760 AT1G51140 AT1G52880 AT1G52890 AT1G61800 AT1G66230 AT1G66350…
Regulation_of_nitrogen_compound_metabolic_process	transription_regulation	0.000163	177	3140	1.36	GO:0051171	AT1G01060 AT1G01520 AT1G01720 AT1G02450 AT1G03360 AT1G03850 AT1G04770 AT1G06180 AT1G07050 AT1G07350 AT1G09250 AT1G09570 AT1G15870 AT1G18330 AT1G18570 AT1G19000 AT1G19050 AT1G19330 AT1G19350 AT1G19490 AT1G20640 AT1G22190 AT1G22770 AT1G25440 AT1G25550 AT1G26790 AT1G27045 AT1G27730 AT1G28370 AT1G42990 AT1G49130 AT1G49760 AT1G51140 AT1G52880 AT1G52890 AT1G66230 AT1G66350 AT1G67970 AT1G68190 AT1G68520…
Regulation_of_nucleic_acid-templated_transcription	transription_regulation	2.1e-07	155	2383	1.57	GO:1903506	AT1G01060 AT1G01520 AT1G01720 AT1G02450 AT1G03850 AT1G06180 AT1G07050 AT1G09250 AT1G09570 AT1G18330 AT1G18570 AT1G19000 AT1G19050 AT1G19330 AT1G19350 AT1G19490 AT1G20640 AT1G22190 AT1G22770 AT1G25440 AT1G25550 AT1G26790 AT1G27045 AT1G27730 AT1G28370 AT1G42990 AT1G49130 AT1G51140 AT1G52880 AT1G52890 AT1G66230 AT1G66350 AT1G67970 AT1G68190 AT1G68520 AT1G68840 AT1G69200 AT1G69260 AT1G69490 AT1G70000…
Regulation_of_nucleobase-containing_compound_metabolic_process	transription_regulation	1.05e-06	162	2587	1.51	GO:0019219	AT1G01060 AT1G01520 AT1G01720 AT1G02450 AT1G03360 AT1G03850 AT1G06180 AT1G07050 AT1G07350 AT1G09250 AT1G09570 AT1G18330 AT1G18570 AT1G19000 AT1G19050 AT1G19330 AT1G19350 AT1G19490 AT1G20640 AT1G22190 AT1G22770 AT1G25440 AT1G25550 AT1G26790 AT1G27045 AT1G27730 AT1G28370 AT1G42990 AT1G49130 AT1G51140 AT1G52880 AT1G52890 AT1G66230 AT1G66350 AT1G67970 AT1G68190 AT1G68520 AT1G68840 AT1G69200 AT1G69260…
Regulation_of_primary_metabolic_process	transription_regulation	0.000366	178	3210	1.34	GO:0080090	AT1G01060 AT1G01520 AT1G01720 AT1G02450 AT1G03360 AT1G03850 AT1G04770 AT1G06180 AT1G07050 AT1G07350 AT1G09250 AT1G09570 AT1G15870 AT1G18330 AT1G18570 AT1G19000 AT1G19050 AT1G19330 AT1G19350 AT1G19490 AT1G20640 AT1G22190 AT1G22770 AT1G25440 AT1G25550 AT1G26790 AT1G27045 AT1G27730 AT1G28370 AT1G42990 AT1G49130 AT1G49760 AT1G51140 AT1G52880 AT1G52890 AT1G66230 AT1G66350 AT1G67970 AT1G68190 AT1G68520…
Regulation_of_transcription_DNA-templated	transription_regulation	2.09557e-07	155	2383	1.57359	GO:0006355	AT1G01060 AT1G01520 AT1G01720 AT1G02450 AT1G03850 AT1G06180 AT1G07050 AT1G09250 AT1G09570 AT1G18330 AT1G18570 AT1G19000 AT1G19050 AT1G19330 AT1G19350 AT1G19490 AT1G20640 AT1G22190 AT1G22770 AT1G25440 AT1G25550 AT1G26790 AT1G27045 AT1G27730 AT1G28370 AT1G42990 AT1G49130 AT1G51140 AT1G52880 AT1G52890 AT1G66230 AT1G66350 AT1G67970 AT1G68190 AT1G68520 AT1G68840 AT1G69200 AT1G69260 AT1G69490 AT1G70000…
Transcription_DNA-templated	transription_regulation	4.83367e-07	162	2555	1.53394	GO:0006351	AT1G01060 AT1G01520 AT1G01720 AT1G02450 AT1G03850 AT1G06180 AT1G07050 AT1G09250 AT1G09570 AT1G18330 AT1G18570 AT1G19000 AT1G19050 AT1G19330 AT1G19350 AT1G19490 AT1G20640 AT1G22190 AT1G22770 AT1G25440 AT1G25550 AT1G26790 AT1G27045 AT1G27730 AT1G28370 AT1G29940 AT1G42990 AT1G49130 AT1G51140 AT1G52880 AT1G52890 AT1G60850 AT1G66230 AT1G66350 AT1G66500 AT1G67970 AT1G68190 AT1G68520 AT1G68840 AT1G69200…
Cell_communication	stress_response	1.82e-12	172	2335	1.78	GO:0007154	AT1G01140 AT1G01720 AT1G04310 AT1G04770 AT1G07430 AT1G08450 AT1G08650 AT1G09570 AT1G17380 AT1G19050 AT1G19180 AT1G19250 AT1G19350 AT1G19570 AT1G21240 AT1G21250 AT1G21270 AT1G22190 AT1G22280 AT1G22770 AT1G25550 AT1G28370 AT1G29450 AT1G29460 AT1G29510 AT1G31540 AT1G35710 AT1G42990 AT1G43910 AT1G51270 AT1G51660 AT1G51940 AT1G52400 AT1G53700 AT1G56510 AT1G59870 AT1G63750 AT1G63860 AT1G63880 AT1G64660…
Cellular_response_to_chemical_stimulus	stress_response	5.65e-47	213	1716	3	GO:0070887	AT1G01720 AT1G04310 AT1G07135 AT1G07400 AT1G07430 AT1G08450 AT1G09070 AT1G13360 AT1G14200 AT1G16030 AT1G17380 AT1G18300 AT1G19050 AT1G19180 AT1G19250 AT1G19350 AT1G19570 AT1G21550 AT1G22190 AT1G22530 AT1G23710 AT1G25550 AT1G26800 AT1G27730 AT1G28370 AT1G29450 AT1G29460 AT1G29510 AT1G30040 AT1G35140 AT1G35710 AT1G42990 AT1G51940 AT1G52400 AT1G53700 AT1G54050 AT1G59860 AT1G59870 AT1G61340 AT1G64660…
Cellular_response_to_decreased_oxygen_levels	stress_response	1.75e-73	102	241	10.24	GO:0036294	AT1G01720 AT1G07135 AT1G07400 AT1G09070 AT1G13360 AT1G14200 AT1G18300 AT1G19250 AT1G21550 AT1G23710 AT1G25550 AT1G26800 AT1G27730 AT1G30040 AT1G35140 AT1G54050 AT1G59860 AT1G61340 AT1G66080 AT1G66090 AT1G66880 AT1G67360 AT1G68840 AT1G72900 AT1G72910 AT1G72920 AT1G72940 AT1G74310 AT1G74940 AT1G76600 AT2G13790 AT2G22500 AT2G25735 AT2G26150 AT2G26190 AT2G26560 AT2G33590 AT2G36460 AT2G36800 AT2G40000…
Cellular_response_to_endogenous_stimulus	stress_response	5.03e-09	88	1038	2.05	GO:0071495	AT1G01720 AT1G04310 AT1G07430 AT1G17380 AT1G19050 AT1G19180 AT1G19350 AT1G22190 AT1G22530 AT1G28370 AT1G29450 AT1G29460 AT1G29510 AT1G35710 AT1G51940 AT1G52400 AT1G53700 AT1G59870 AT1G66350 AT1G68840 AT1G69260 AT1G70700 AT1G74670 AT1G74890 AT1G74930 AT1G78080 AT1G78570 AT1G79700 AT1G80440 AT2G01420 AT2G13790 AT2G18120 AT2G18300 AT2G20880 AT2G30020 AT2G33580 AT2G34070 AT2G38120 AT2G38240 AT2G42870…
Cellular_response_to_hormone_stimulus	stress_response	1.77e-09	87	999	2.11	GO:0032870	AT1G01720 AT1G04310 AT1G07430 AT1G17380 AT1G19050 AT1G19180 AT1G19350 AT1G22190 AT1G22530 AT1G28370 AT1G29450 AT1G29460 AT1G29510 AT1G35710 AT1G51940 AT1G52400 AT1G53700 AT1G59870 AT1G66350 AT1G68840 AT1G69260 AT1G70700 AT1G74670 AT1G74890 AT1G74930 AT1G78080 AT1G78570 AT1G79700 AT1G80440 AT2G01420 AT2G13790 AT2G18120 AT2G18300 AT2G20880 AT2G30020 AT2G34070 AT2G38120 AT2G38240 AT2G42870 AT2G43010…
Cellular_response_to_hypoxia	stress_response	9.4e-74	102	239	10.32	GO:0071456	AT1G01720 AT1G07135 AT1G07400 AT1G09070 AT1G13360 AT1G14200 AT1G18300 AT1G19250 AT1G21550 AT1G23710 AT1G25550 AT1G26800 AT1G27730 AT1G30040 AT1G35140 AT1G54050 AT1G59860 AT1G61340 AT1G66080 AT1G66090 AT1G66880 AT1G67360 AT1G68840 AT1G72900 AT1G72910 AT1G72920 AT1G72940 AT1G74310 AT1G74940 AT1G76600 AT2G13790 AT2G22500 AT2G25735 AT2G26150 AT2G26190 AT2G26560 AT2G33590 AT2G36460 AT2G36800 AT2G40000…
Cellular_response_to_lipid	stress_response	0.000261	44	540	1.97	GO:0071396	AT1G01720 AT1G07430 AT1G17380 AT1G19180 AT1G19350 AT1G51940 AT1G52400 AT1G66350 AT1G69260 AT1G70700 AT1G74670 AT2G13790 AT2G18300 AT2G30020 AT2G34070 AT2G38240 AT2G42870 AT2G46400 AT2G46510 AT3G15210 AT3G18130 AT3G22231 AT3G25010 AT3G45640 AT3G46620 AT3G50500 AT3G56400 AT3G57530 AT3G63060 AT4G11890 AT4G18010 AT4G23810 AT4G26150 AT4G30610 AT5G05600 AT5G08520 AT5G11260 AT5G26920 AT5G45110 AT5G58430…
Cellular_response_to_organic_substance	stress_response	4.03e-14	111	1189	2.26	GO:0071310	AT1G01720 AT1G04310 AT1G07430 AT1G08450 AT1G16030 AT1G17380 AT1G19050 AT1G19180 AT1G19350 AT1G19570 AT1G22190 AT1G22530 AT1G26800 AT1G28370 AT1G29450 AT1G29460 AT1G29510 AT1G35710 AT1G42990 AT1G51940 AT1G52400 AT1G53700 AT1G59870 AT1G66350 AT1G68840 AT1G69260 AT1G70700 AT1G74670 AT1G74890 AT1G74930 AT1G78080 AT1G78570 AT1G79700 AT1G80440 AT2G01420 AT2G04450 AT2G13790 AT2G18120 AT2G18300 AT2G20880…
Cellular_response_to_oxygen-containing_compound	stress_response	0.000188	56	741	1.83	GO:1901701	AT1G01720 AT1G07430 AT1G17380 AT1G19180 AT1G19350 AT1G19570 AT1G51940 AT1G52400 AT1G59870 AT1G64660 AT1G66350 AT1G69260 AT1G70700 AT1G74670 AT2G04450 AT2G13790 AT2G18300 AT2G30020 AT2G33580 AT2G34070 AT2G38240 AT2G42870 AT2G46400 AT2G46510 AT3G15210 AT3G18130 AT3G22231 AT3G25010 AT3G28270 AT3G45060 AT3G45640 AT3G46620 AT3G50500 AT3G50930 AT3G56400 AT3G57530 AT3G63060 AT4G11890 AT4G14400 AT4G18010…
Cellular_response_to_oxygen_levels	stress_response	1.75e-73	102	241	10.24	GO:0071453	AT1G01720 AT1G07135 AT1G07400 AT1G09070 AT1G13360 AT1G14200 AT1G18300 AT1G19250 AT1G21550 AT1G23710 AT1G25550 AT1G26800 AT1G27730 AT1G30040 AT1G35140 AT1G54050 AT1G59860 AT1G61340 AT1G66080 AT1G66090 AT1G66880 AT1G67360 AT1G68840 AT1G72900 AT1G72910 AT1G72920 AT1G72940 AT1G74310 AT1G74940 AT1G76600 AT2G13790 AT2G22500 AT2G25735 AT2G26150 AT2G26190 AT2G26560 AT2G33590 AT2G36460 AT2G36800 AT2G40000…
Cellular_response_to_stimulus	stress_response	1.2e-41	305	3313	2.23	GO:0051716	AT1G01140 AT1G01720 AT1G04310 AT1G04770 AT1G07135 AT1G07400 AT1G07430 AT1G08450 AT1G08650 AT1G09070 AT1G09570 AT1G13360 AT1G14200 AT1G16030 AT1G17380 AT1G18300 AT1G18570 AT1G19050 AT1G19180 AT1G19250 AT1G19350 AT1G19570 AT1G20823 AT1G21240 AT1G21250 AT1G21270 AT1G21550 AT1G21750 AT1G22190 AT1G22280 AT1G22530 AT1G22770 AT1G23710 AT1G25550 AT1G26800 AT1G27730 AT1G28370 AT1G29450 AT1G29460 AT1G29510…
Cellular_response_to_stress	stress_response	2.52e-44	175	1265	3.35	GO:0033554	AT1G01140 AT1G01720 AT1G04770 AT1G07135 AT1G07400 AT1G08450 AT1G09070 AT1G13360 AT1G14200 AT1G16030 AT1G18300 AT1G18570 AT1G19250 AT1G19570 AT1G20823 AT1G21550 AT1G21750 AT1G23710 AT1G25550 AT1G26800 AT1G27730 AT1G30040 AT1G35140 AT1G42990 AT1G43910 AT1G51660 AT1G54050 AT1G59860 AT1G59870 AT1G61340 AT1G64660 AT1G66080 AT1G66090 AT1G66880 AT1G67360 AT1G67970 AT1G68840 AT1G71260 AT1G72900 AT1G72910…
Hormone-mediated_signaling_pathway	stress_response	3.05e-09	83	944	2.13	GO:0009755	AT1G01720 AT1G04310 AT1G07430 AT1G17380 AT1G19050 AT1G19180 AT1G19350 AT1G22190 AT1G28370 AT1G29450 AT1G29460 AT1G29510 AT1G35710 AT1G51940 AT1G52400 AT1G53700 AT1G59870 AT1G66350 AT1G68840 AT1G69260 AT1G70700 AT1G74670 AT1G74890 AT1G74930 AT1G78080 AT1G78570 AT1G79700 AT1G80440 AT2G01420 AT2G13790 AT2G18120 AT2G18300 AT2G20880 AT2G30020 AT2G34070 AT2G38120 AT2G38240 AT2G42870 AT2G43010 AT2G44840…
Response_to_abiotic_stimulus	stress_response	1.18e-85	312	2214	3.41	GO:0009628	AT1G01060 AT1G01140 AT1G01720 AT1G02205 AT1G02820 AT1G02930 AT1G07000 AT1G07135 AT1G07350 AT1G07400 AT1G08650 AT1G08930 AT1G09070 AT1G09570 AT1G10370 AT1G10522 AT1G10760 AT1G13360 AT1G14200 AT1G14980 AT1G15510 AT1G16030 AT1G17420 AT1G18300 AT1G18740 AT1G19180 AT1G19250 AT1G19350 AT1G19490 AT1G20450 AT1G20823 AT1G21550 AT1G22190 AT1G22280 AT1G22770 AT1G23710 AT1G25275 AT1G25550 AT1G26800 AT1G27730…
Response_to_abscisic_acid	stress_response	3.06e-08	59	603	2.37	GO:0009737	AT1G01720 AT1G07430 AT1G08930 AT1G20450 AT1G27730 AT1G43910 AT1G51940 AT1G52400 AT1G55020 AT1G59870 AT1G61340 AT1G66350 AT1G69260 AT2G17840 AT2G26190 AT2G30020 AT2G33380 AT2G33590 AT2G38750 AT2G42540 AT2G46510 AT2G47180 AT3G11820 AT3G15210 AT3G18130 AT3G22231 AT3G24500 AT3G25010 AT3G28210 AT3G45640 AT3G46620 AT3G50500 AT3G53420 AT3G57530 AT3G61890 AT3G63060 AT3G63210 AT4G04020 AT4G04490 AT4G11890…
Response_to_alcohol	stress_response	7.92e-09	61	612	2.41	GO:0097305	AT1G01720 AT1G07430 AT1G08650 AT1G08930 AT1G20450 AT1G27730 AT1G43910 AT1G51940 AT1G52400 AT1G55020 AT1G59870 AT1G61340 AT1G66350 AT1G69260 AT2G14610 AT2G17840 AT2G26190 AT2G30020 AT2G33380 AT2G33590 AT2G38750 AT2G42540 AT2G46510 AT2G47180 AT3G11820 AT3G15210 AT3G18130 AT3G22231 AT3G24500 AT3G25010 AT3G28210 AT3G45640 AT3G46620 AT3G50500 AT3G53420 AT3G57530 AT3G61890 AT3G63060 AT3G63210 AT4G04020…
Response_to_chemical	stress_response	6.76e-78	365	3152	2.8	GO:0042221	AT1G01140 AT1G01720 AT1G02205 AT1G02820 AT1G02920 AT1G02930 AT1G02940 AT1G03850 AT1G04310 AT1G07000 AT1G07135 AT1G07400 AT1G07430 AT1G08450 AT1G08650 AT1G08930 AT1G09070 AT1G09570 AT1G10370 AT1G11840 AT1G13360 AT1G13430 AT1G14200 AT1G15440 AT1G16030 AT1G17380 AT1G17420 AT1G18300 AT1G19050 AT1G19180 AT1G19250 AT1G19350 AT1G19490 AT1G19570 AT1G20450 AT1G20510 AT1G20823 AT1G21250 AT1G21270 AT1G21550…
Response_to_decreased_oxygen_levels	stress_response	4.62e-69	103	269	9.26	GO:0036293	AT1G01720 AT1G07135 AT1G07400 AT1G09070 AT1G13360 AT1G14200 AT1G18300 AT1G19250 AT1G21550 AT1G23710 AT1G25550 AT1G26800 AT1G27730 AT1G30040 AT1G35140 AT1G54050 AT1G59860 AT1G61340 AT1G66080 AT1G66090 AT1G66880 AT1G67360 AT1G68840 AT1G72900 AT1G72910 AT1G72920 AT1G72940 AT1G74310 AT1G74940 AT1G76600 AT2G13790 AT2G22500 AT2G25735 AT2G26150 AT2G26190 AT2G26560 AT2G33590 AT2G36460 AT2G36800 AT2G40000…
Response_to_endogenous_stimulus	stress_response	5.81e-18	148	1631	2.2	GO:0009719	AT1G01720 AT1G03850 AT1G04310 AT1G07430 AT1G08930 AT1G10370 AT1G13430 AT1G17380 AT1G17420 AT1G19050 AT1G19180 AT1G19350 AT1G19570 AT1G20450 AT1G20510 AT1G22190 AT1G22530 AT1G27730 AT1G28370 AT1G29450 AT1G29460 AT1G29510 AT1G35710 AT1G43910 AT1G44350 AT1G51940 AT1G52400 AT1G53700 AT1G55020 AT1G59870 AT1G61340 AT1G66350 AT1G68840 AT1G69260 AT1G70700 AT1G73080 AT1G74670 AT1G74890 AT1G74930 AT1G78080…
Response_to_hormone	stress_response	1.72e-18	147	1593	2.23	GO:0009725	AT1G01720 AT1G03850 AT1G04310 AT1G07430 AT1G08930 AT1G10370 AT1G13430 AT1G17380 AT1G17420 AT1G19050 AT1G19180 AT1G19350 AT1G19570 AT1G20450 AT1G20510 AT1G22190 AT1G22530 AT1G27730 AT1G28370 AT1G29450 AT1G29460 AT1G29510 AT1G35710 AT1G43910 AT1G44350 AT1G51940 AT1G52400 AT1G53700 AT1G55020 AT1G59870 AT1G61340 AT1G66350 AT1G68840 AT1G69260 AT1G70700 AT1G73080 AT1G74670 AT1G74890 AT1G74930 AT1G78080…
Response_to_hypoxia	stress_response	8.8e-70	103	265	9.4	GO:0001666	AT1G01720 AT1G07135 AT1G07400 AT1G09070 AT1G13360 AT1G14200 AT1G18300 AT1G19250 AT1G21550 AT1G23710 AT1G25550 AT1G26800 AT1G27730 AT1G30040 AT1G35140 AT1G54050 AT1G59860 AT1G61340 AT1G66080 AT1G66090 AT1G66880 AT1G67360 AT1G68840 AT1G72900 AT1G72910 AT1G72920 AT1G72940 AT1G74310 AT1G74940 AT1G76600 AT2G13790 AT2G22500 AT2G25735 AT2G26150 AT2G26190 AT2G26560 AT2G33590 AT2G36460 AT2G36800 AT2G40000…
Response_to_lipid	stress_response	2.08e-13	95	966	2.38	GO:0033993	AT1G01720 AT1G07430 AT1G08930 AT1G17380 AT1G17420 AT1G19180 AT1G19350 AT1G19570 AT1G20450 AT1G20510 AT1G27730 AT1G43910 AT1G44350 AT1G51940 AT1G52400 AT1G55020 AT1G59870 AT1G61340 AT1G66350 AT1G69260 AT1G70700 AT1G73080 AT1G74670 AT2G13790 AT2G17840 AT2G18300 AT2G26190 AT2G30020 AT2G33380 AT2G33590 AT2G34070 AT2G34810 AT2G38240 AT2G38750 AT2G42540 AT2G42870 AT2G44080 AT2G46400 AT2G46510 AT2G47180…
Response_to_organic_substance	stress_response	4.48e-42	228	2063	2.67	GO:0010033	AT1G01140 AT1G01720 AT1G03850 AT1G04310 AT1G07000 AT1G07430 AT1G08450 AT1G08650 AT1G08930 AT1G10370 AT1G13430 AT1G15440 AT1G16030 AT1G17380 AT1G17420 AT1G19050 AT1G19180 AT1G19350 AT1G19570 AT1G20450 AT1G20510 AT1G20823 AT1G21250 AT1G21270 AT1G22160 AT1G22190 AT1G22530 AT1G23030 AT1G26800 AT1G27730 AT1G28330 AT1G28370 AT1G29450 AT1G29460 AT1G29510 AT1G29910 AT1G35710 AT1G42990 AT1G43910 AT1G44350…
Response_to_oxygen-containing_compound	stress_response	2.34e-47	212	1692	3.03	GO:1901700	AT1G01140 AT1G01720 AT1G02205 AT1G02820 AT1G02930 AT1G07000 AT1G07400 AT1G07430 AT1G08650 AT1G08930 AT1G10370 AT1G15440 AT1G17380 AT1G17420 AT1G19050 AT1G19180 AT1G19350 AT1G19490 AT1G19570 AT1G20450 AT1G20510 AT1G20823 AT1G21250 AT1G21270 AT1G22160 AT1G22190 AT1G22770 AT1G23030 AT1G27730 AT1G28330 AT1G29910 AT1G42990 AT1G43910 AT1G44350 AT1G51940 AT1G52400 AT1G52890 AT1G53540 AT1G54050 AT1G55020…
Response_to_oxygen_levels	stress_response	6.39e-69	103	270	9.23	GO:0070482	AT1G01720 AT1G07135 AT1G07400 AT1G09070 AT1G13360 AT1G14200 AT1G18300 AT1G19250 AT1G21550 AT1G23710 AT1G25550 AT1G26800 AT1G27730 AT1G30040 AT1G35140 AT1G54050 AT1G59860 AT1G61340 AT1G66080 AT1G66090 AT1G66880 AT1G67360 AT1G68840 AT1G72900 AT1G72910 AT1G72920 AT1G72940 AT1G74310 AT1G74940 AT1G76600 AT2G13790 AT2G22500 AT2G25735 AT2G26150 AT2G26190 AT2G26560 AT2G33590 AT2G36460 AT2G36800 AT2G40000…
Response_to_stress	stress_response	1.12e-77	412	3906	2.55	GO:0006950	AT1G01060 AT1G01140 AT1G01310 AT1G01720 AT1G02205 AT1G02450 AT1G02820 AT1G02920 AT1G02930 AT1G03850 AT1G04770 AT1G07000 AT1G07135 AT1G07400 AT1G08450 AT1G08930 AT1G09070 AT1G10370 AT1G10760 AT1G13340 AT1G13360 AT1G13608 AT1G14200 AT1G14980 AT1G16030 AT1G17380 AT1G17420 AT1G18300 AT1G18570 AT1G18740 AT1G19180 AT1G19250 AT1G19350 AT1G19490 AT1G19570 AT1G20450 AT1G20510 AT1G20823 AT1G21120 AT1G21250…
Signal_transduction	stress_response	4.62e-13	155	1990	1.88	GO:0007165	AT1G01140 AT1G01720 AT1G04310 AT1G07430 AT1G08450 AT1G08650 AT1G09570 AT1G17380 AT1G19050 AT1G19180 AT1G19250 AT1G19350 AT1G19570 AT1G21240 AT1G21250 AT1G21270 AT1G22190 AT1G22280 AT1G22770 AT1G28370 AT1G29450 AT1G29460 AT1G29510 AT1G31540 AT1G35710 AT1G42990 AT1G51270 AT1G51660 AT1G51940 AT1G52400 AT1G53700 AT1G56510 AT1G59870 AT1G63750 AT1G63860 AT1G63880 AT1G66090 AT1G66350 AT1G68840 AT1G69260…
Signaling	stress_response	2.4e-12	155	2032	1.85	GO:0023052	AT1G01140 AT1G01720 AT1G04310 AT1G07430 AT1G08450 AT1G08650 AT1G09570 AT1G17380 AT1G19050 AT1G19180 AT1G19250 AT1G19350 AT1G19570 AT1G21240 AT1G21250 AT1G21270 AT1G22190 AT1G22280 AT1G22770 AT1G28370 AT1G29450 AT1G29460 AT1G29510 AT1G31540 AT1G35710 AT1G42990 AT1G51270 AT1G51660 AT1G51940 AT1G52400 AT1G53700 AT1G56510 AT1G59870 AT1G63750 AT1G63860 AT1G63880 AT1G66090 AT1G66350 AT1G68840 AT1G69260…
Activation_of_immune_response	immune_response	0.000158	10	44	5.5	GO:0002253	AT1G08450 AT1G19250 AT1G59870 AT2G15080 AT2G32680 AT2G45180 AT3G15210 AT3G22600 AT3G56400 AT4G12720
Activation_of_innate_immune_response	immune_response	0.000158	10	44	5.5	GO:0002218	AT1G08450 AT1G19250 AT1G59870 AT2G15080 AT2G32680 AT2G45180 AT3G15210 AT3G22600 AT3G56400 AT4G12720
Immune_response-activating_signal_transduction	immune_response	0.00033	8	30	6.45	GO:0002757	AT1G08450 AT1G19250 AT1G59870 AT2G15080 AT2G32680 AT2G45180 AT3G22600 AT4G12720
Immune_response-regulating_signaling_pathway	immune_response	2.35e-05	11	44	6.05	GO:0002764	AT1G08450 AT1G19250 AT1G59870 AT2G15080 AT2G18300 AT2G32680 AT2G45180 AT3G09830 AT3G22600 AT3G62600 AT4G12720
Innate_immune_response-activating_signal_transduction	immune_response	0.00033	8	30	6.45	GO:0002758	AT1G08450 AT1G19250 AT1G59870 AT2G15080 AT2G32680 AT2G45180 AT3G22600 AT4G12720
Pattern_recognition_receptor_signaling_pathway	immune_response	0.00148	6	20	7.26	GO:0002221	AT1G59870 AT2G18300 AT2G32680 AT3G09830 AT3G22600 AT3G62600
Positive_regulation_of_defense_response	immune_response	1.16e-05	17	99	4.15	GO:0031349	AT1G07000 AT1G08450 AT1G19250 AT1G59870 AT1G73805 AT2G15080 AT2G31880 AT2G32680 AT2G45180 AT3G15210 AT3G22231 AT3G22600 AT3G56400 AT4G11890 AT4G12720 AT4G14400 AT5G25440
Positive_regulation_of_immune_response	immune_response	7.98e-05	15	91	3.99	GO:0050778	AT1G07000 AT1G08450 AT1G19250 AT1G59870 AT1G73805 AT2G15080 AT2G32680 AT2G45180 AT3G15210 AT3G22231 AT3G22600 AT3G56400 AT4G12720 AT4G14400 AT5G25440
Positive_regulation_of_immune_system_process	immune_response	7.98e-05	15	91	3.99	GO:0002684	AT1G07000 AT1G08450 AT1G19250 AT1G59870 AT1G73805 AT2G15080 AT2G32680 AT2G45180 AT3G15210 AT3G22231 AT3G22600 AT3G56400 AT4G12720 AT4G14400 AT5G25440
Positive_regulation_of_innate_immune_response	immune_response	0.0009	10	54	4.48	GO:0045089	AT1G08450 AT1G19250 AT1G59870 AT2G15080 AT2G32680 AT2G45180 AT3G15210 AT3G22600 AT3G56400 AT4G12720
Positive_regulation_of_response_to_biotic_stimulus	immune_response	7.98e-05	15	91	3.99	GO:0002833	AT1G07000 AT1G08450 AT1G19250 AT1G59870 AT1G73805 AT2G15080 AT2G32680 AT2G45180 AT3G15210 AT3G22231 AT3G22600 AT3G56400 AT4G12720 AT4G14400 AT5G25440
Positive_regulation_of_response_to_external_stimulus	immune_response	2.69e-05	16	94	4.12	GO:0032103	AT1G07000 AT1G08450 AT1G19250 AT1G59870 AT1G73805 AT2G15080 AT2G32680 AT2G45180 AT3G15210 AT3G22231 AT3G22600 AT3G56400 AT4G12720 AT4G14400 AT5G20150 AT5G25440
Regulation_of_defense_response	immune_response	8.27e-12	42	273	3.72	GO:0031347	AT1G02450 AT1G07000 AT1G08450 AT1G17380 AT1G19180 AT1G19250 AT1G44350 AT1G51940 AT1G59870 AT1G70700 AT1G73805 AT1G74710 AT1G80840 AT2G15080 AT2G18300 AT2G31880 AT2G32680 AT2G45180 AT3G11820 AT3G15210 AT3G22231 AT3G22600 AT3G25020 AT3G25882 AT3G56400 AT3G61190 AT4G02550 AT4G11890 AT4G12720 AT4G14400 AT4G23570 AT4G23810 AT4G31800 AT5G24590 AT5G24660 AT5G25440 AT5G26920 AT5G39670 AT5G48380 AT5G62570…
Regulation_of_immune_response	immune_response	7.11e-08	30	207	3.51	GO:0050776	AT1G02450 AT1G07000 AT1G08450 AT1G19250 AT1G44350 AT1G59870 AT1G73805 AT2G15080 AT2G18300 AT2G32680 AT2G45180 AT3G09830 AT3G15210 AT3G22231 AT3G22600 AT3G25020 AT3G25882 AT3G50950 AT3G56400 AT3G62600 AT4G12720 AT4G14400 AT4G23570 AT5G24590 AT5G25440 AT5G26920 AT5G39670 AT5G62570 AT5G66210 AT5G67300
Regulation_of_immune_system_process	immune_response	7.11e-08	30	207	3.51	GO:0002682	AT1G02450 AT1G07000 AT1G08450 AT1G19250 AT1G44350 AT1G59870 AT1G73805 AT2G15080 AT2G18300 AT2G32680 AT2G45180 AT3G09830 AT3G15210 AT3G22231 AT3G22600 AT3G25020 AT3G25882 AT3G50950 AT3G56400 AT3G62600 AT4G12720 AT4G14400 AT4G23570 AT5G24590 AT5G25440 AT5G26920 AT5G39670 AT5G62570 AT5G66210 AT5G67300
Regulation_of_response_to_biotic_stimulus	immune_response	5.01e-07	27	190	3.44	GO:0002831	AT1G02450 AT1G07000 AT1G08450 AT1G19250 AT1G44350 AT1G59870 AT1G73805 AT2G15080 AT2G18300 AT2G32680 AT2G45180 AT3G15210 AT3G22231 AT3G22600 AT3G25020 AT3G25882 AT3G56400 AT4G12720 AT4G14400 AT4G23570 AT5G24590 AT5G25440 AT5G26920 AT5G39670 AT5G62570 AT5G66210 AT5G67300
Regulation_of_response_to_external_stimulus	immune_response	2.39e-07	28	195	3.47	GO:0032101	AT1G02450 AT1G07000 AT1G08450 AT1G19250 AT1G44350 AT1G59870 AT1G73805 AT2G15080 AT2G18300 AT2G32680 AT2G45180 AT3G15210 AT3G22231 AT3G22600 AT3G25020 AT3G25882 AT3G56400 AT4G12720 AT4G14400 AT4G23570 AT5G20150 AT5G24590 AT5G25440 AT5G26920 AT5G39670 AT5G62570 AT5G66210 AT5G67300
Regulation_of_response_to_stimulus	immune_response	1.14e-13	82	760	2.61	GO:0048583	AT1G01720 AT1G02450 AT1G04310 AT1G07000 AT1G07430 AT1G08450 AT1G10370 AT1G17380 AT1G19180 AT1G19250 AT1G19570 AT1G22770 AT1G44350 AT1G51940 AT1G52400 AT1G59870 AT1G66230 AT1G66350 AT1G67360 AT1G70700 AT1G73805 AT1G74710 AT1G76040 AT1G78570 AT1G80440 AT1G80840 AT2G01420 AT2G04450 AT2G15080 AT2G18300 AT2G20880 AT2G31865 AT2G31880 AT2G32680 AT2G38240 AT2G43010 AT2G45180 AT2G46400 AT3G09830 AT3G11820…
Regulation_of_response_to_stress	immune_response	1.92e-13	56	410	3.3	GO:0080134	AT1G02450 AT1G07000 AT1G08450 AT1G10370 AT1G17380 AT1G19180 AT1G19250 AT1G44350 AT1G51940 AT1G59870 AT1G66230 AT1G67360 AT1G70700 AT1G73805 AT1G74710 AT1G76040 AT1G80840 AT2G15080 AT2G18300 AT2G20880 AT2G31865 AT2G31880 AT2G32680 AT2G45180 AT2G46400 AT3G11820 AT3G15210 AT3G22231 AT3G22600 AT3G25020 AT3G25882 AT3G45640 AT3G49530 AT3G56400 AT3G61190 AT4G02550 AT4G11890 AT4G12720 AT4G14400 AT4G23570…
Biological_process_involved_in_interspecies_interaction_between_organisms	response_to_bacterium	8.47e-32	168	1473	2.76	GO:0044419	AT1G02205 AT1G02450 AT1G02920 AT1G02930 AT1G03850 AT1G07000 AT1G08450 AT1G10760 AT1G13608 AT1G14200 AT1G16030 AT1G17420 AT1G18570 AT1G19180 AT1G19250 AT1G19350 AT1G19570 AT1G20510 AT1G21250 AT1G22190 AT1G25275 AT1G33960 AT1G44350 AT1G51660 AT1G51940 AT1G52400 AT1G55260 AT1G56510 AT1G59870 AT1G61340 AT1G61800 AT1G63880 AT1G72520 AT1G73080 AT1G73805 AT1G74710 AT1G74930 AT1G76040 AT1G76600 AT1G80840…
Defense_response	response_to_bacterium	3.32e-23	165	1700	2.35	GO:0006952	AT1G01310 AT1G02205 AT1G02450 AT1G02920 AT1G02930 AT1G03850 AT1G07000 AT1G08450 AT1G13608 AT1G14200 AT1G17380 AT1G18570 AT1G19180 AT1G19250 AT1G19350 AT1G19570 AT1G20823 AT1G21250 AT1G31540 AT1G44350 AT1G51660 AT1G51940 AT1G52400 AT1G55020 AT1G55260 AT1G56510 AT1G59870 AT1G63750 AT1G63860 AT1G63880 AT1G66090 AT1G70700 AT1G71260 AT1G72930 AT1G72940 AT1G73080 AT1G73805 AT1G74710 AT1G74930 AT1G76040…
Defense_response_to_bacterium	response_to_bacterium	1.64e-19	70	457	3.71	GO:0042742	AT1G02205 AT1G02450 AT1G02920 AT1G02930 AT1G07000 AT1G08450 AT1G18570 AT1G19180 AT1G19250 AT1G19350 AT1G59870 AT1G73805 AT1G74710 AT1G80840 AT2G15080 AT2G22240 AT2G23810 AT2G32680 AT2G38470 AT2G40000 AT2G46400 AT2G47130 AT2G47730 AT3G09830 AT3G15210 AT3G44260 AT3G45860 AT3G48090 AT3G50950 AT3G56400 AT3G56710 AT4G11460 AT4G12720 AT4G14400 AT4G19700 AT4G20260 AT4G21380 AT4G23130 AT4G23140 AT4G23150…
Defense_response_to_other_organism	response_to_bacterium	6.25e-21	127	1193	2.58	GO:0098542	AT1G02205 AT1G02450 AT1G02920 AT1G02930 AT1G03850 AT1G07000 AT1G08450 AT1G13608 AT1G14200 AT1G18570 AT1G19180 AT1G19250 AT1G19350 AT1G21250 AT1G44350 AT1G51660 AT1G51940 AT1G52400 AT1G55260 AT1G56510 AT1G59870 AT1G63880 AT1G73080 AT1G73805 AT1G74710 AT1G74930 AT1G76040 AT1G80840 AT2G14560 AT2G14610 AT2G15080 AT2G18300 AT2G18660 AT2G22240 AT2G23810 AT2G26560 AT2G30020 AT2G31865 AT2G32680 AT2G33380…
Immune_response	response_to_bacterium	5.22e-21	128	1205	2.57	GO:0006955	AT1G02205 AT1G02450 AT1G02920 AT1G02930 AT1G03850 AT1G07000 AT1G08450 AT1G13608 AT1G14200 AT1G18570 AT1G19180 AT1G19250 AT1G19350 AT1G21250 AT1G44350 AT1G51660 AT1G51940 AT1G52400 AT1G55260 AT1G56510 AT1G59870 AT1G63880 AT1G73080 AT1G73805 AT1G74710 AT1G74930 AT1G76040 AT1G80840 AT2G14560 AT2G14610 AT2G15080 AT2G18300 AT2G18660 AT2G22240 AT2G23810 AT2G26560 AT2G30020 AT2G31865 AT2G32680 AT2G33380…
Immune_system_process	response_to_bacterium	2.42e-21	129	1209	2.58	GO:0002376	AT1G02205 AT1G02450 AT1G02920 AT1G02930 AT1G03850 AT1G07000 AT1G08450 AT1G13608 AT1G14200 AT1G18570 AT1G19180 AT1G19250 AT1G19350 AT1G21250 AT1G42990 AT1G44350 AT1G51660 AT1G51940 AT1G52400 AT1G55260 AT1G56510 AT1G59870 AT1G63880 AT1G73080 AT1G73805 AT1G74710 AT1G74930 AT1G76040 AT1G80840 AT2G14560 AT2G14610 AT2G15080 AT2G18300 AT2G18660 AT2G22240 AT2G23810 AT2G26560 AT2G30020 AT2G31865 AT2G32680…
Response_to_bacterium	response_to_bacterium	5.62e-27	88	534	3.99	GO:0009617	AT1G02205 AT1G02450 AT1G02920 AT1G02930 AT1G07000 AT1G08450 AT1G18570 AT1G19180 AT1G19250 AT1G19350 AT1G20510 AT1G33960 AT1G59870 AT1G61340 AT1G72520 AT1G73805 AT1G74710 AT1G80840 AT2G15080 AT2G22240 AT2G23810 AT2G26440 AT2G32680 AT2G33830 AT2G38470 AT2G40000 AT2G46400 AT2G47130 AT2G47730 AT3G09830 AT3G12580 AT3G15210 AT3G22231 AT3G22600 AT3G44260 AT3G45640 AT3G45860 AT3G48090 AT3G50480 AT3G50930…
Response_to_biotic_stimulus	response_to_bacterium	1.97e-32	170	1482	2.78	GO:0009607	AT1G01310 AT1G02205 AT1G02450 AT1G02920 AT1G02930 AT1G03850 AT1G07000 AT1G08450 AT1G10760 AT1G13608 AT1G14200 AT1G16030 AT1G17420 AT1G18570 AT1G19180 AT1G19250 AT1G19350 AT1G19570 AT1G20510 AT1G21250 AT1G22190 AT1G25275 AT1G33960 AT1G44350 AT1G51660 AT1G51940 AT1G52400 AT1G55260 AT1G56510 AT1G59870 AT1G61340 AT1G61800 AT1G63880 AT1G72520 AT1G73080 AT1G73805 AT1G74710 AT1G74930 AT1G76040 AT1G76600…
Response_to_external_biotic_stimulus	response_to_bacterium	2.44e-32	168	1457	2.79	GO:0043207	AT1G02205 AT1G02450 AT1G02920 AT1G02930 AT1G03850 AT1G07000 AT1G08450 AT1G10760 AT1G13608 AT1G14200 AT1G16030 AT1G17420 AT1G18570 AT1G19180 AT1G19250 AT1G19350 AT1G19570 AT1G20510 AT1G21250 AT1G22190 AT1G25275 AT1G33960 AT1G44350 AT1G51660 AT1G51940 AT1G52400 AT1G55260 AT1G56510 AT1G59870 AT1G61340 AT1G61800 AT1G63880 AT1G72520 AT1G73080 AT1G73805 AT1G74710 AT1G74930 AT1G76040 AT1G76600 AT1G80840…
Response_to_external_stimulus	response_to_bacterium	4.74e-32	198	1914	2.5	GO:0009605	AT1G01140 AT1G02205 AT1G02450 AT1G02920 AT1G02930 AT1G03850 AT1G04770 AT1G07000 AT1G08450 AT1G09570 AT1G10760 AT1G13608 AT1G14200 AT1G16030 AT1G17420 AT1G18570 AT1G19180 AT1G19250 AT1G19350 AT1G19570 AT1G20510 AT1G21050 AT1G21250 AT1G22160 AT1G22190 AT1G22770 AT1G25275 AT1G25550 AT1G33960 AT1G43910 AT1G44350 AT1G47395 AT1G47400 AT1G51660 AT1G51940 AT1G52400 AT1G55260 AT1G56510 AT1G59870 AT1G61340…
Response_to_other_organism	response_to_bacterium	2.44e-32	168	1457	2.79	GO:0051707	AT1G02205 AT1G02450 AT1G02920 AT1G02930 AT1G03850 AT1G07000 AT1G08450 AT1G10760 AT1G13608 AT1G14200 AT1G16030 AT1G17420 AT1G18570 AT1G19180 AT1G19250 AT1G19350 AT1G19570 AT1G20510 AT1G21250 AT1G22190 AT1G25275 AT1G33960 AT1G44350 AT1G51660 AT1G51940 AT1G52400 AT1G55260 AT1G56510 AT1G59870 AT1G61340 AT1G61800 AT1G63880 AT1G72520 AT1G73080 AT1G73805 AT1G74710 AT1G74930 AT1G76040 AT1G76600 AT1G80840…
Cellular_component_biogenesis	ribosome_biogenesis	0.000597	96	1542	1.51	GO:0044085	AT1G03360 AT1G03870 AT1G06720 AT1G07400 AT1G12780 AT1G15440 AT1G16720 AT1G23280 AT1G25260 AT1G29320 AT1G29940 AT1G31660 AT1G48920 AT1G50920 AT1G51380 AT1G52400 AT1G52930 AT1G53540 AT1G54050 AT1G56110 AT1G59860 AT1G61580 AT1G63810 AT1G64660 AT1G65060 AT1G66230 AT1G74560 AT1G80270 AT2G06510 AT2G19310 AT2G29500 AT2G34357 AT2G37990 AT2G40360 AT2G42540 AT2G42710 AT3G05060 AT3G06530 AT3G09720 AT3G10530…
NcRNA_metabolic_process	ribosome_biogenesis	9.89e-06	48	536	2.17	GO:0034660	AT1G03360 AT1G06720 AT1G12780 AT1G15440 AT1G23280 AT1G25260 AT1G29880 AT1G31660 AT1G48920 AT1G51380 AT1G52930 AT1G63810 AT2G34357 AT2G37990 AT2G40360 AT2G42710 AT3G06530 AT3G09720 AT3G10530 AT3G11964 AT3G15140 AT3G15460 AT3G18600 AT3G21540 AT3G51800 AT3G56990 AT3G57000 AT3G57150 AT3G57940 AT3G58660 AT4G01560 AT4G04940 AT4G09730 AT4G25730 AT4G26600 AT4G28450 AT5G08180 AT5G08600 AT5G14520 AT5G14580…
NcRNA_processing	ribosome_biogenesis	1.78e-07	47	450	2.53	GO:0034470	AT1G03360 AT1G06720 AT1G12780 AT1G15440 AT1G23280 AT1G25260 AT1G31660 AT1G48920 AT1G51380 AT1G52930 AT1G63810 AT2G34357 AT2G37990 AT2G40360 AT2G42710 AT3G06530 AT3G09720 AT3G10530 AT3G11964 AT3G15140 AT3G15460 AT3G18600 AT3G21540 AT3G51800 AT3G56990 AT3G57000 AT3G57150 AT3G57940 AT3G58660 AT4G01560 AT4G04940 AT4G09730 AT4G25730 AT4G26600 AT4G28450 AT5G08180 AT5G08600 AT5G14520 AT5G14580 AT5G15550…
RRNA_metabolic_process	ribosome_biogenesis	1.59e-13	47	299	3.8	GO:0016072	AT1G03360 AT1G06720 AT1G12780 AT1G15440 AT1G23280 AT1G25260 AT1G31660 AT1G48920 AT1G51380 AT1G52930 AT1G63810 AT2G34357 AT2G37990 AT2G40360 AT2G42710 AT3G06530 AT3G09720 AT3G10530 AT3G11964 AT3G15140 AT3G15460 AT3G18600 AT3G21540 AT3G51800 AT3G56990 AT3G57000 AT3G57150 AT3G57940 AT3G58660 AT4G01560 AT4G04940 AT4G09730 AT4G25730 AT4G26600 AT4G28450 AT5G08180 AT5G08600 AT5G14520 AT5G14580 AT5G15550…
RRNA_processing	ribosome_biogenesis	8.54e-14	47	294	3.87	GO:0006364	AT1G03360 AT1G06720 AT1G12780 AT1G15440 AT1G23280 AT1G25260 AT1G31660 AT1G48920 AT1G51380 AT1G52930 AT1G63810 AT2G34357 AT2G37990 AT2G40360 AT2G42710 AT3G06530 AT3G09720 AT3G10530 AT3G11964 AT3G15140 AT3G15460 AT3G18600 AT3G21540 AT3G51800 AT3G56990 AT3G57000 AT3G57150 AT3G57940 AT3G58660 AT4G01560 AT4G04940 AT4G09730 AT4G25730 AT4G26600 AT4G28450 AT5G08180 AT5G08600 AT5G14520 AT5G14580 AT5G15550…
Ribonucleoprotein_complex_biogenesis	ribosome_biogenesis	7.14e-09	56	535	2.53	GO:0022613	AT1G03360 AT1G06720 AT1G12780 AT1G15440 AT1G23280 AT1G25260 AT1G29320 AT1G29940 AT1G31660 AT1G48920 AT1G50920 AT1G51380 AT1G52930 AT1G56110 AT1G61580 AT1G63810 AT2G34357 AT2G37990 AT2G40360 AT2G42710 AT3G05060 AT3G06530 AT3G09720 AT3G10530 AT3G11964 AT3G15140 AT3G15460 AT3G18600 AT3G21540 AT3G51800 AT3G55510 AT3G56990 AT3G57000 AT3G57150 AT3G57940 AT3G58660 AT4G01560 AT4G04940 AT4G09730 AT4G15770…
Ribosome_biogenesis	ribosome_biogenesis	1.43e-12	56	430	3.15	GO:0042254	AT1G03360 AT1G06720 AT1G12780 AT1G15440 AT1G23280 AT1G25260 AT1G29320 AT1G29940 AT1G31660 AT1G48920 AT1G50920 AT1G51380 AT1G52930 AT1G56110 AT1G61580 AT1G63810 AT2G34357 AT2G37990 AT2G40360 AT2G42710 AT3G05060 AT3G06530 AT3G09720 AT3G10530 AT3G11964 AT3G15140 AT3G15460 AT3G18600 AT3G21540 AT3G51800 AT3G55510 AT3G56990 AT3G57000 AT3G57150 AT3G57940 AT3G58660 AT4G01560 AT4G04940 AT4G09730 AT4G15770…
Biological_process_involved_in_interaction_with_symbiont	cell_death	0.0011	13	90	3.49	GO:0051702	AT1G08450 AT1G19250 AT1G51660 AT1G59870 AT1G73805 AT2G26560 AT2G47130 AT3G45640 AT3G48090 AT3G50480 AT3G50930 AT4G12720 AT5G26920
Biological_process_involved_in_symbiotic_interaction	cell_death	0.00283	14	113	3	GO:0044403	AT1G08450 AT1G19250 AT1G19570 AT1G51660 AT1G59870 AT1G73805 AT2G26560 AT2G47130 AT3G45640 AT3G48090 AT3G50480 AT3G50930 AT4G12720 AT5G26920
Cell_death	cell_death	1.37e-07	29	201	3.49	GO:0008219	AT1G08450 AT1G19250 AT1G21750 AT1G51660 AT1G59870 AT1G73805 AT2G13790 AT2G26560 AT2G31880 AT2G46240 AT2G47130 AT3G12920 AT3G45640 AT3G45860 AT3G48090 AT3G50480 AT3G50930 AT4G12720 AT4G14400 AT4G19700 AT4G23130 AT4G25110 AT5G02190 AT5G10380 AT5G26920 AT5G47120 AT5G47910 AT5G48030 AT5G48380
Plant-type_hypersensitive_response	cell_death	0.000908	13	88	3.57	GO:0009626	AT1G08450 AT1G19250 AT1G51660 AT1G59870 AT1G73805 AT2G26560 AT2G47130 AT3G45640 AT3G48090 AT3G50480 AT3G50930 AT4G12720 AT5G26920
Programmed_cell_death	cell_death	4.08e-07	25	164	3.69	GO:0012501	AT1G08450 AT1G19250 AT1G21750 AT1G51660 AT1G59870 AT1G73805 AT2G26560 AT2G46240 AT2G47130 AT3G12920 AT3G45640 AT3G45860 AT3G48090 AT3G50480 AT3G50930 AT4G12720 AT4G19700 AT4G23130 AT4G25110 AT5G02190 AT5G10380 AT5G26920 AT5G47120 AT5G47910 AT5G48030
Programmed_cell_death_induced_by_symbiont	cell_death	0.00101	13	89	3.53	GO:0034050	AT1G08450 AT1G19250 AT1G51660 AT1G59870 AT1G73805 AT2G26560 AT2G47130 AT3G45640 AT3G48090 AT3G50480 AT3G50930 AT4G12720 AT5G26920
Chaperone-mediated_protein_folding	protein_folding	2.07e-07	16	66	5.86	GO:0061077	AT1G14980 AT1G16030 AT2G20560 AT2G32120 AT3G09440 AT3G12580 AT3G13470 AT3G25230 AT4G37910 AT5G02490 AT5G09590 AT5G42020 AT5G48030 AT5G48570 AT5G52640 AT5G56030
Chaperone_cofactor-dependent_protein_refolding	protein_folding	8.12e-06	12	48	6.05	GO:0051085	AT1G14980 AT1G16030 AT2G20560 AT2G32120 AT3G09440 AT3G12580 AT3G13470 AT4G37910 AT5G02490 AT5G09590 AT5G42020 AT5G48030
Protein_refolding	protein_folding	1.71e-12	16	33	11.73	GO:0042026	AT1G16030 AT2G25140 AT2G28000 AT2G32120 AT2G33210 AT3G09440 AT3G12580 AT3G13470 AT3G23990 AT4G37910 AT5G02490 AT5G09590 AT5G15450 AT5G18820 AT5G42020 AT5G48030
de_novo_posttranslational_protein_folding	protein_folding	8.11624e-06	12	48	6.04816	GO:0051084	AT1G14980 AT1G16030 AT2G20560 AT2G32120 AT3G09440 AT3G12580 AT3G13470 AT4G37910 AT5G02490 AT5G09590 AT5G42020 AT5G48030
de_novo_protein_folding	protein_folding	1.27859e-05	12	0	5.80623	GO:0006458	AT1G14980 AT1G16030 AT2G20560 AT2G32120 AT3G09440 AT3G12580 AT3G13470 AT4G37910 AT5G02490 AT5G09590 AT5G42020 AT5G48030
Negative_regulation_of_RNA_biosynthetic_process	negative_regulation_of_transcription	0.00222	23	241	2.31	GO:1902679	AT1G02450 AT1G03850 AT1G19350 AT1G27730 AT1G66230 AT1G68840 AT1G69260 AT1G80840 AT2G27840 AT2G32100 AT2G36050 AT2G42870 AT3G07050 AT3G15210 AT3G21150 AT3G27250 AT3G44750 AT3G56400 AT3G62950 AT4G04025 AT4G11660 AT4G36990 AT5G22650
Negative_regulation_of_cellular_macromolecule_biosynthetic_process	negative_regulation_of_transcription	0.00218	29	337	2.08	GO:2000113	AT1G02450 AT1G03360 AT1G03850 AT1G09570 AT1G19350 AT1G27730 AT1G66230 AT1G68840 AT1G69260 AT1G80840 AT2G25900 AT2G27840 AT2G32100 AT2G36050 AT2G42870 AT3G07050 AT3G15210 AT3G17330 AT3G21150 AT3G27250 AT3G44260 AT3G44750 AT3G56400 AT3G62950 AT4G04025 AT4G11660 AT4G13170 AT4G36990 AT5G22650
Negative_regulation_of_macromolecule_biosynthetic_process	negative_regulation_of_transcription	0.00225	29	338	2.08	GO:0010558	AT1G02450 AT1G03360 AT1G03850 AT1G09570 AT1G19350 AT1G27730 AT1G66230 AT1G68840 AT1G69260 AT1G80840 AT2G25900 AT2G27840 AT2G32100 AT2G36050 AT2G42870 AT3G07050 AT3G15210 AT3G17330 AT3G21150 AT3G27250 AT3G44260 AT3G44750 AT3G56400 AT3G62950 AT4G04025 AT4G11660 AT4G13170 AT4G36990 AT5G22650
Negative_regulation_of_nucleic_acid-templated_transcription	negative_regulation_of_transcription	0.00222	23	241	2.31	GO:1903507	AT1G02450 AT1G03850 AT1G19350 AT1G27730 AT1G66230 AT1G68840 AT1G69260 AT1G80840 AT2G27840 AT2G32100 AT2G36050 AT2G42870 AT3G07050 AT3G15210 AT3G21150 AT3G27250 AT3G44750 AT3G56400 AT3G62950 AT4G04025 AT4G11660 AT4G36990 AT5G22650
Negative_regulation_of_transcription_DNA-templated	negative_regulation_of_transcription	0.00213438	23	240	2.31846	GO:0045892"	AT1G02450 AT1G03850 AT1G19350 AT1G27730 AT1G66230 AT1G68840 AT1G69260 AT1G80840 AT2G27840 AT2G32100 AT2G36050 AT2G42870 AT3G07050 AT3G15210 AT3G21150 AT3G27250 AT3G44750 AT3G56400 AT3G62950 AT4G04025 AT4G11660 AT4G36990 AT5G22650
Cellular_response_to_topologically_incorrect_protein	response_to_unfolded_protein	1.47e-07	17	73	5.63	GO:0035967	AT1G08450 AT1G16030 AT1G26800 AT1G42990 AT2G26150 AT2G32120 AT3G09440 AT3G10800 AT3G12580 AT3G49530 AT4G15420 AT4G28270 AT4G29330 AT4G37910 AT5G02490 AT5G09590 AT5G42020
Cellular_response_to_unfolded_protein	response_to_unfolded_protein	1.83e-07	14	49	6.91	GO:0034620	AT1G08450 AT1G16030 AT1G42990 AT2G26150 AT2G32120 AT3G09440 AT3G10800 AT3G12580 AT3G49530 AT4G29330 AT4G37910 AT5G02490 AT5G09590 AT5G42020
Response_to_topologically_incorrect_protein	response_to_unfolded_protein	2.77e-09	20	81	5.97	GO:0035966	AT1G08450 AT1G16030 AT1G26800 AT1G42990 AT1G74310 AT2G25140 AT2G26150 AT2G32120 AT3G09440 AT3G10800 AT3G12580 AT3G49530 AT4G15420 AT4G28270 AT4G29330 AT4G37910 AT5G02490 AT5G09590 AT5G15450 AT5G42020
Response_to_unfolded_protein	response_to_unfolded_protein	1.12e-09	17	54	7.62	GO:0006986	AT1G08450 AT1G16030 AT1G42990 AT1G74310 AT2G25140 AT2G26150 AT2G32120 AT3G09440 AT3G10800 AT3G12580 AT3G49530 AT4G29330 AT4G37910 AT5G02490 AT5G09590 AT5G15450 AT5G42020
Response_to_acid_chemical	response_to_water	5.34e-16	63	442	3.45	GO:0001101	AT1G02205 AT1G02820 AT1G02930 AT1G07000 AT1G08930 AT1G10370 AT1G19490 AT1G20450 AT1G22190 AT1G27730 AT1G52400 AT1G52890 AT1G59870 AT1G61340 AT1G64660 AT1G65486 AT1G67360 AT1G78080 AT2G04030 AT2G14610 AT2G17840 AT2G20880 AT2G33380 AT2G33590 AT2G37040 AT2G37180 AT2G38470 AT2G38750 AT2G38760 AT2G42540 AT2G46400 AT2G47180 AT3G05640 AT3G23920 AT3G24500 AT3G28270 AT3G45640 AT3G46620 AT3G46970 AT3G50500…
Response_to_inorganic_substance	response_to_water	4.69e-25	119	962	2.99	GO:0010035	AT1G02205 AT1G02820 AT1G02920 AT1G02930 AT1G07000 AT1G07400 AT1G08930 AT1G10370 AT1G11840 AT1G19490 AT1G19570 AT1G20450 AT1G21750 AT1G22190 AT1G22770 AT1G27730 AT1G29880 AT1G49760 AT1G52400 AT1G52890 AT1G53540 AT1G54050 AT1G59860 AT1G59870 AT1G64660 AT1G65486 AT1G67360 AT1G72520 AT1G74560 AT1G78080 AT2G04030 AT2G06050 AT2G14610 AT2G17840 AT2G19310 AT2G20880 AT2G26150 AT2G26530 AT2G26560 AT2G29500…
Response_to_water	response_to_water	2.57e-16	61	411	3.59	GO:0009415	AT1G02205 AT1G02820 AT1G02930 AT1G07000 AT1G08930 AT1G10370 AT1G19490 AT1G20450 AT1G22190 AT1G27730 AT1G52400 AT1G52890 AT1G59870 AT1G64660 AT1G65486 AT1G67360 AT1G78080 AT2G04030 AT2G14610 AT2G17840 AT2G20880 AT2G33380 AT2G33590 AT2G37040 AT2G37180 AT2G38470 AT2G38750 AT2G38760 AT2G42540 AT2G46400 AT2G47180 AT3G05640 AT3G23920 AT3G24500 AT3G28270 AT3G46620 AT3G46970 AT3G50500 AT3G53420 AT3G56400…
Response_to_water_deprivation	response_to_water	8.75e-17	61	402	3.67	GO:0009414	AT1G02205 AT1G02820 AT1G02930 AT1G07000 AT1G08930 AT1G10370 AT1G19490 AT1G20450 AT1G22190 AT1G27730 AT1G52400 AT1G52890 AT1G59870 AT1G64660 AT1G65486 AT1G67360 AT1G78080 AT2G04030 AT2G14610 AT2G17840 AT2G20880 AT2G33380 AT2G33590 AT2G37040 AT2G37180 AT2G38470 AT2G38750 AT2G38760 AT2G42540 AT2G46400 AT2G47180 AT3G05640 AT3G23920 AT3G24500 AT3G28270 AT3G46620 AT3G46970 AT3G50500 AT3G53420 AT3G56400…
Cellular_response_to_ethylene_stimulus	ethylene_signaling	0.0009	22	210	2.53	GO:0071369	AT1G04310 AT1G22190 AT1G28370 AT1G68840 AT1G74930 AT1G78080 AT1G79700 AT2G20880 AT2G44840 AT3G15210 AT3G24500 AT3G56400 AT4G17490 AT4G17500 AT4G34410 AT5G22270 AT5G47230 AT5G53290 AT5G59430 AT5G61590 AT5G61600 AT5G67190
Ethylene-activated_signaling_pathway	ethylene_signaling	0.000558	22	203	2.62	GO:0009873	AT1G04310 AT1G22190 AT1G28370 AT1G68840 AT1G74930 AT1G78080 AT1G79700 AT2G20880 AT2G44840 AT3G15210 AT3G24500 AT3G56400 AT4G17490 AT4G17500 AT4G34410 AT5G22270 AT5G47230 AT5G53290 AT5G59430 AT5G61590 AT5G61600 AT5G67190
Phosphorelay_signal_transduction_system	ethylene_signaling	0.00048	26	260	2.42	GO:0000160	AT1G04310 AT1G09570 AT1G19050 AT1G22190 AT1G28370 AT1G68840 AT1G74890 AT1G74930 AT1G78080 AT1G79700 AT2G20880 AT2G44840 AT3G15210 AT3G24500 AT3G56400 AT3G57040 AT4G17490 AT4G17500 AT4G34410 AT5G22270 AT5G47230 AT5G53290 AT5G59430 AT5G61590 AT5G61600 AT5G67190
Cellular_response_to_abiotic_stimulus	environmental_stimulus_response	0.00107	23	228	2.44	GO:0071214	AT1G09570 AT1G19180 AT1G22280 AT1G22770 AT1G56510 AT1G64660 AT1G75100 AT1G78080 AT2G02950 AT2G34620 AT2G42540 AT2G43010 AT3G21150 AT3G22231 AT3G22840 AT3G28270 AT3G56710 AT4G08930 AT4G14690 AT4G20260 AT5G11260 AT5G24120 AT5G47910
Cellular_response_to_environmental_stimulus	environmental_stimulus_response	0.00107	23	228	2.44	GO:0104004	AT1G09570 AT1G19180 AT1G22280 AT1G22770 AT1G56510 AT1G64660 AT1G75100 AT1G78080 AT2G02950 AT2G34620 AT2G42540 AT2G43010 AT3G21150 AT3G22231 AT3G22840 AT3G28270 AT3G56710 AT4G08930 AT4G14690 AT4G20260 AT5G11260 AT5G24120 AT5G47910
Cellular_response_to_light_stimulus	environmental_stimulus_response	0.0022	16	137	2.83	GO:0071482	AT1G09570 AT1G22280 AT1G22770 AT1G56510 AT1G75100 AT2G02950 AT2G42540 AT2G43010 AT3G21150 AT3G22231 AT3G22840 AT3G56710 AT4G08930 AT4G14690 AT5G11260 AT5G24120
Regulation_of_cell_communication	regulation_of_signaling	1.07e-07	39	328	2.88	GO:0010646	AT1G01720 AT1G04310 AT1G07430 AT1G17380 AT1G19180 AT1G19570 AT1G51940 AT1G52400 AT1G59870 AT1G66350 AT1G70700 AT1G78570 AT1G80440 AT2G01420 AT2G04450 AT2G18300 AT2G38240 AT2G43010 AT2G46400 AT3G15210 AT3G18130 AT3G49530 AT3G50060 AT3G56400 AT4G11890 AT4G14400 AT4G23810 AT4G26150 AT4G34410 AT4G37260 AT5G05600 AT5G08520 AT5G11260 AT5G20150 AT5G26920 AT5G45110 AT5G58430 AT5G66070 AT5G67300
Regulation_of_signal_transduction	regulation_of_signaling	1.49e-07	38	319	2.88	GO:0009966	AT1G01720 AT1G04310 AT1G07430 AT1G17380 AT1G19180 AT1G19570 AT1G51940 AT1G52400 AT1G59870 AT1G66350 AT1G70700 AT1G78570 AT1G80440 AT2G01420 AT2G04450 AT2G18300 AT2G38240 AT2G43010 AT2G46400 AT3G15210 AT3G18130 AT3G49530 AT3G50060 AT3G56400 AT4G11890 AT4G14400 AT4G23810 AT4G26150 AT4G34410 AT4G37260 AT5G05600 AT5G08520 AT5G11260 AT5G26920 AT5G45110 AT5G58430 AT5G66070 AT5G67300
Regulation_of_signaling	regulation_of_signaling	2.1e-07	38	324	2.84	GO:0023051	AT1G01720 AT1G04310 AT1G07430 AT1G17380 AT1G19180 AT1G19570 AT1G51940 AT1G52400 AT1G59870 AT1G66350 AT1G70700 AT1G78570 AT1G80440 AT2G01420 AT2G04450 AT2G18300 AT2G38240 AT2G43010 AT2G46400 AT3G15210 AT3G18130 AT3G49530 AT3G50060 AT3G56400 AT4G11890 AT4G14400 AT4G23810 AT4G26150 AT4G34410 AT4G37260 AT5G05600 AT5G08520 AT5G11260 AT5G26920 AT5G45110 AT5G58430 AT5G66070 AT5G67300
Anion_homeostasis	anion_homeostasis	0.00144	7	28	6.05	GO:0055081	AT3G02040 AT3G17790 AT3G47420 AT3G51860 AT5G04340 AT5G15330 AT5G58070
Phosphate_ion_homeostasis	anion_homeostasis	0.00111	6	19	7.64	GO:0055062	AT3G02040 AT3G17790 AT3G47420 AT3G51860 AT5G04340 AT5G15330
Trivalent_inorganic_anion_homeostasis	anion_homeostasis	0.00111	6	19	7.64	GO:0072506	AT3G02040 AT3G17790 AT3G47420 AT3G51860 AT5G04340 AT5G15330
Positive_regulation_of_cell_communication	positive_regulation_of_cell_communication	0.000522	14	95	3.57	GO:0010647	AT1G07430 AT1G19570 AT1G51940 AT1G52400 AT2G04450 AT3G18130 AT3G49530 AT3G50060 AT3G56400 AT4G37260 AT5G20150 AT5G26920 AT5G58430 AT5G67300
Positive_regulation_of_signal_transduction	positive_regulation_of_cell_communication	0.00122	13	91	3.46	GO:0009967	AT1G07430 AT1G19570 AT1G51940 AT1G52400 AT2G04450 AT3G18130 AT3G49530 AT3G50060 AT3G56400 AT4G37260 AT5G26920 AT5G58430 AT5G67300
Positive_regulation_of_signaling	positive_regulation_of_cell_communication	0.00135	13	92	3.42	GO:0023056	AT1G07430 AT1G19570 AT1G51940 AT1G52400 AT2G04450 AT3G18130 AT3G49530 AT3G50060 AT3G56400 AT4G37260 AT5G26920 AT5G58430 AT5G67300
Response_to_chitin	response_to_nitrogen_compound	1.68e-29	48	138	8.41	GO:0010200	AT1G08930 AT1G19050 AT1G20823 AT1G23030 AT1G27730 AT1G42990 AT1G59870 AT1G75490 AT1G80840 AT2G13790 AT2G17040 AT2G23320 AT2G26150 AT2G33580 AT2G38470 AT2G40140 AT2G44840 AT2G46400 AT3G15210 AT3G16720 AT3G21150 AT3G28210 AT3G45640 AT3G46090 AT3G46600 AT3G46620 AT3G49530 AT3G50060 AT3G52800 AT3G55980 AT3G56400 AT4G11660 AT4G17490 AT4G17500 AT4G18880 AT4G23810 AT4G31800 AT4G33050 AT4G34410 AT4G37260…
Response_to_nitrogen_compound	response_to_nitrogen_compound	1e-19	58	319	4.4	GO:1901698	AT1G08650 AT1G08930 AT1G10370 AT1G19050 AT1G20823 AT1G23030 AT1G27730 AT1G42990 AT1G59870 AT1G61340 AT1G75490 AT1G80840 AT2G13790 AT2G14610 AT2G17040 AT2G23320 AT2G26150 AT2G33580 AT2G38470 AT2G40140 AT2G44840 AT2G46400 AT3G15210 AT3G16720 AT3G21150 AT3G28210 AT3G45060 AT3G45640 AT3G46090 AT3G46600 AT3G46620 AT3G49530 AT3G50060 AT3G52800 AT3G55980 AT3G56400 AT4G11660 AT4G15420 AT4G17490 AT4G17500…
Response_to_organonitrogen_compound	response_to_nitrogen_compound	4.99e-22	56	268	5.06	GO:0010243	AT1G08650 AT1G08930 AT1G10370 AT1G19050 AT1G20823 AT1G23030 AT1G27730 AT1G42990 AT1G59870 AT1G61340 AT1G75490 AT1G80840 AT2G13790 AT2G14610 AT2G17040 AT2G23320 AT2G26150 AT2G33580 AT2G38470 AT2G40140 AT2G44840 AT2G46400 AT3G15210 AT3G16720 AT3G21150 AT3G28210 AT3G45640 AT3G46090 AT3G46600 AT3G46620 AT3G49530 AT3G50060 AT3G52800 AT3G55980 AT3G56400 AT4G11660 AT4G15420 AT4G17490 AT4G17500 AT4G18880…
Flavonoid_biosynthetic_process	flavonoid_biosynthesis	1.89e-08	19	81	5.67	GO:0009813	AT1G30530 AT1G70000 AT1G71030 AT1G78570 AT2G16720 AT2G38240 AT2G40890 AT3G21560 AT3G29590 AT3G55120 AT4G22880 AT5G05270 AT5G05600 AT5G07990 AT5G13930 AT5G24530 AT5G48930 AT5G49330 AT5G54160
Flavonoid_metabolic_process	flavonoid_biosynthesis	2.11e-08	21	100	5.08	GO:0009812	AT1G08450 AT1G30530 AT1G70000 AT1G71030 AT1G78570 AT2G16720 AT2G38240 AT2G40890 AT3G21560 AT3G29590 AT3G55120 AT4G22880 AT5G05270 AT5G05600 AT5G07990 AT5G11260 AT5G13930 AT5G24530 AT5G48930 AT5G49330 AT5G54160
Pigment_biosynthetic_process	flavonoid_biosynthesis	0.000796	19	165	2.79	GO:0046148	AT1G09932 AT1G30530 AT1G44446 AT1G70000 AT1G71030 AT1G78570 AT2G16720 AT3G21560 AT3G22840 AT3G29590 AT4G14690 AT4G22880 AT4G26150 AT5G13930 AT5G24530 AT5G26030 AT5G44190 AT5G49330 AT5G54160
Pigment_metabolic_process	flavonoid_biosynthesis	0.00126	21	201	2.53	GO:0042440	AT1G08450 AT1G09932 AT1G30530 AT1G44446 AT1G70000 AT1G71030 AT1G78570 AT2G16720 AT3G21560 AT3G22840 AT3G29590 AT4G14690 AT4G22880 AT4G26150 AT5G11260 AT5G13930 AT5G24530 AT5G26030 AT5G44190 AT5G49330 AT5G54160
Response_to_hydrogen_peroxide	response_to_ROS	1.18e-10	20	69	7.01	GO:0042542	AT1G07400 AT1G19570 AT1G22770 AT1G53540 AT1G54050 AT1G59860 AT2G19310 AT2G26150 AT2G29500 AT3G17790 AT3G46230 AT4G23810 AT5G05410 AT5G12020 AT5G12030 AT5G24110 AT5G37670 AT5G37770 AT5G59720 AT5G67480
Response_to_oxidative_stress	response_to_ROS	2.36e-14	62	465	3.23	GO:0006979	AT1G02930 AT1G03850 AT1G07400 AT1G13340 AT1G19570 AT1G21520 AT1G22770 AT1G27730 AT1G52200 AT1G53540 AT1G54050 AT1G59860 AT1G72520 AT1G75100 AT1G80130 AT2G06050 AT2G19310 AT2G26150 AT2G29450 AT2G29500 AT2G37040 AT2G40000 AT2G47180 AT3G10020 AT3G10985 AT3G17790 AT3G17800 AT3G45640 AT3G46090 AT3G46230 AT3G48090 AT3G56400 AT3G57520 AT4G04840 AT4G11280 AT4G12720 AT4G17490 AT4G18880 AT4G23140 AT4G23150…
Response_to_reactive_oxygen_species	response_to_ROS	4.82e-14	34	155	5.31	GO:0000302	AT1G07400 AT1G19570 AT1G22770 AT1G53540 AT1G54050 AT1G59860 AT1G72520 AT2G06050 AT2G19310 AT2G26150 AT2G29500 AT3G10985 AT3G17790 AT3G17800 AT3G46230 AT3G48090 AT3G56400 AT4G12720 AT4G17490 AT4G18880 AT4G23140 AT4G23150 AT4G23810 AT4G25100 AT5G05410 AT5G12020 AT5G12030 AT5G24110 AT5G37670 AT5G37770 AT5G52310 AT5G58070 AT5G59720 AT5G67480
Response_to_cold	response_to_temperature	4.56e-16	61	416	3.55	GO:0009409	AT1G01060 AT1G01140 AT1G08930 AT1G10760 AT1G18740 AT1G20450 AT1G20823 AT1G22190 AT1G22770 AT1G27730 AT1G74710 AT1G78080 AT2G17840 AT2G30250 AT2G33380 AT2G35040 AT2G38470 AT2G38750 AT2G38760 AT2G40140 AT2G42540 AT2G47180 AT2G47730 AT3G08720 AT3G22840 AT3G25770 AT3G45640 AT3G47470 AT3G49530 AT3G57260 AT3G61190 AT4G04020 AT4G11890 AT4G14400 AT4G20260 AT4G24280 AT4G25470 AT4G25490 AT4G34150 AT4G34710…
Response_to_heat	response_to_temperature	3.69e-35	68	243	6.77	GO:0009408	AT1G07400 AT1G14980 AT1G16030 AT1G53540 AT1G54050 AT1G59860 AT1G66080 AT1G67970 AT1G74310 AT2G04030 AT2G19310 AT2G20880 AT2G25140 AT2G26150 AT2G29500 AT2G30250 AT2G32120 AT2G33590 AT2G38470 AT2G38750 AT2G38760 AT2G42540 AT2G46240 AT2G47180 AT3G08720 AT3G08970 AT3G09350 AT3G09440 AT3G10800 AT3G12580 AT3G22840 AT3G23990 AT3G24500 AT3G25230 AT3G46230 AT3G51910 AT3G61190 AT4G12400 AT4G14690 AT4G17250…
Response_to_temperature_stimulus	response_to_temperature	4.91e-39	114	633	4.36	GO:0009266	AT1G01060 AT1G01140 AT1G07400 AT1G08930 AT1G10760 AT1G14980 AT1G16030 AT1G18740 AT1G20450 AT1G20823 AT1G22190 AT1G22770 AT1G27730 AT1G53540 AT1G54050 AT1G59860 AT1G66080 AT1G67970 AT1G74310 AT1G74710 AT1G78080 AT2G04030 AT2G17840 AT2G19310 AT2G20880 AT2G25140 AT2G26150 AT2G29500 AT2G30250 AT2G32120 AT2G33380 AT2G33590 AT2G35040 AT2G38470 AT2G38750 AT2G38760 AT2G40140 AT2G42540 AT2G46240 AT2G47180…
Jasmonic_acid_mediated_signaling_pathway	response_to_JA	0.00239	13	98	3.21	GO:0009867	AT1G17380 AT1G19180 AT1G66350 AT1G70700 AT2G34070 AT2G38240 AT2G46400 AT3G15210 AT3G56400 AT4G23810 AT5G05600 AT5G45110 AT5G67300
Regulation_of_jasmonic_acid_mediated_signaling_pathway	response_to_JA	8.35e-05	10	41	5.9	GO:2000022	AT1G17380 AT1G19180 AT1G70700 AT2G38240 AT2G46400 AT3G56400 AT4G23810 AT5G05600 AT5G45110 AT5G67300
Response_to_fatty_acid	response_to_JA	8.95e-11	34	200	4.11	GO:0070542	AT1G17380 AT1G17420 AT1G19180 AT1G19570 AT1G20510 AT1G44350 AT1G55020 AT1G61340 AT1G66350 AT1G70700 AT1G73080 AT2G34070 AT2G34810 AT2G38240 AT2G46400 AT3G15210 AT3G44860 AT3G50480 AT3G51430 AT3G56400 AT4G11280 AT4G20860 AT4G22880 AT4G23600 AT4G23810 AT4G34710 AT4G35770 AT5G05600 AT5G11790 AT5G13930 AT5G24780 AT5G45110 AT5G67300 AT5G67480
Response_to_jasmonic_acid	response_to_JA	5.03e-11	34	196	4.2	GO:0009753	AT1G17380 AT1G17420 AT1G19180 AT1G19570 AT1G20510 AT1G44350 AT1G55020 AT1G61340 AT1G66350 AT1G70700 AT1G73080 AT2G34070 AT2G34810 AT2G38240 AT2G46400 AT3G15210 AT3G44860 AT3G50480 AT3G51430 AT3G56400 AT4G11280 AT4G20860 AT4G22880 AT4G23600 AT4G23810 AT4G34710 AT4G35770 AT5G05600 AT5G11790 AT5G13930 AT5G24780 AT5G45110 AT5G67300 AT5G67480
Defense_response_to_oomycetes	response_to_oomycetes	4.64e-05	15	87	4.17	GO:0002229	AT1G07000 AT1G56510 AT1G59870 AT1G73805 AT2G32680 AT3G22231 AT3G23550 AT3G25020 AT3G56400 AT4G10500 AT4G14400 AT5G24530 AT5G24660 AT5G26920 AT5G60270
Response_to_oomycetes	response_to_oomycetes	1.19e-07	21	110	4.62	GO:0002239	AT1G07000 AT1G56510 AT1G59870 AT1G73805 AT2G32680 AT2G34930 AT3G01290 AT3G22231 AT3G22600 AT3G23550 AT3G25020 AT3G56400 AT4G10500 AT4G11890 AT4G14400 AT5G20230 AT5G24530 AT5G24660 AT5G26920 AT5G60270 AT5G60950
Response_to_organic_cyclic_compound	response_to_organic_cyic_compound	1.71e-12	47	319	3.56	GO:0014070	AT1G08650 AT1G19350 AT1G19570 AT1G21250 AT1G21270 AT1G59870 AT1G61340 AT1G66350 AT1G80840 AT2G04450 AT2G13790 AT2G14560 AT2G14610 AT2G18300 AT2G33380 AT2G40000 AT2G42870 AT2G44080 AT2G46400 AT3G04290 AT3G22231 AT3G44860 AT3G45860 AT3G50480 AT3G50930 AT3G51430 AT3G56400 AT3G61190 AT4G10500 AT4G14400 AT4G23130 AT4G23270 AT4G23810 AT4G30610 AT4G31800 AT5G03350 AT5G06320 AT5G08520 AT5G08760 AT5G24110…
Response_to_salicylic_acid	response_to_organic_cyic_compound	2.98e-15	37	169	5.3	GO:0009751	AT1G19570 AT1G21250 AT1G21270 AT1G61340 AT1G66350 AT1G80840 AT2G04450 AT2G14560 AT2G33380 AT2G40000 AT2G46400 AT3G04290 AT3G22231 AT3G44860 AT3G45860 AT3G50480 AT3G50930 AT3G51430 AT3G56400 AT3G61190 AT4G10500 AT4G14400 AT4G23130 AT4G23270 AT4G23810 AT4G31800 AT5G03350 AT5G06320 AT5G08520 AT5G08760 AT5G24110 AT5G24530 AT5G44568 AT5G45110 AT5G54610 AT5G67300 AT5G67480
Response_to_far_red_light	response_to_red_light	0.000781	9	43	5.06	GO:0010218	AT1G09570 AT1G22770 AT2G02950 AT3G22840 AT4G14690 AT5G11260 AT5G24120 AT5G44110 AT5G52250
Response_to_red_light	response_to_red_light	2.71e-05	13	63	4.99	GO:0010114	AT1G09570 AT1G22280 AT1G30040 AT2G02950 AT2G21650 AT2G43010 AT3G22840 AT4G14690 AT4G26150 AT5G11260 AT5G24120 AT5G44110 AT5G52250
Response_to_UV	response_to_UV-B	2.07e-07	21	114	4.46	GO:0009411	AT1G19350 AT1G35210 AT1G56510 AT1G73805 AT2G36750 AT2G37040 AT3G17800 AT3G21890 AT3G22231 AT3G22840 AT3G45640 AT3G50930 AT3G55120 AT4G14690 AT5G05410 AT5G11260 AT5G13930 AT5G26920 AT5G49330 AT5G52250 AT5G59820
Response_to_UV-B	response_to_UV-B	8.19e-07	16	73	5.3	GO:0010224	AT1G35210 AT1G73805 AT2G36750 AT2G37040 AT3G17800 AT3G21890 AT3G45640 AT3G55120 AT4G14690 AT5G05410 AT5G11260 AT5G13930 AT5G26920 AT5G49330 AT5G52250 AT5G59820
Defense_response_to_fungus	response_to_fungus	7.7e-05	47	562	2.02	GO:0050832	AT1G02205 AT1G02920 AT1G03850 AT1G07000 AT1G13608 AT1G19250 AT1G21250 AT1G51940 AT1G52400 AT1G55260 AT1G56510 AT1G59870 AT1G63880 AT1G74710 AT1G76040 AT1G80840 AT2G14560 AT2G22240 AT2G30020 AT2G31865 AT2G32680 AT2G33380 AT2G34930 AT2G38470 AT2G40140 AT2G43535 AT2G46240 AT3G04220 AT3G11820 AT3G22231 AT3G22600 AT3G25020 AT3G50480 AT3G52400 AT3G56400 AT4G08870 AT4G14400 AT4G16860 AT4G19700 AT4G23570…
Response_to_fungus	response_to_fungus	3.09e-08	62	650	2.31	GO:0009620	AT1G02205 AT1G02920 AT1G03850 AT1G07000 AT1G10760 AT1G13608 AT1G17420 AT1G19250 AT1G19570 AT1G21250 AT1G22190 AT1G51940 AT1G52400 AT1G55260 AT1G56510 AT1G59870 AT1G63880 AT1G74710 AT1G76040 AT1G76600 AT1G80840 AT2G06050 AT2G14560 AT2G22240 AT2G30020 AT2G31865 AT2G32680 AT2G33380 AT2G34930 AT2G38470 AT2G40140 AT2G43535 AT2G46240 AT3G04220 AT3G10985 AT3G11820 AT3G22231 AT3G22600 AT3G25020 AT3G25780…
Cleavage_involved_in_rRNA_processing	cleavage_involved_in_rRNA_processing	0.000152	8	27	7.17	GO:0000469	AT1G03360 AT1G06720 AT1G48920 AT2G37990 AT3G15140 AT5G08180 AT5G16750 AT5G22100
Endonucleolytic_cleavage_involved_in_rRNA_processing	cleavage_involved_in_rRNA_processing	0.00148	5	13	9.3	GO:0000478	AT1G06720 AT1G48920 AT2G37990 AT5G16750 AT5G22100
Maturation_of_LSU-rRNA	ribosomal_large_subunit_biogenesis	6.43e-06	12	47	6.18	GO:0000470	AT1G23280 AT2G40360 AT2G42710 AT3G18600 AT3G58660 AT4G01560 AT4G25730 AT4G26600 AT5G08180 AT5G14520 AT5G15550 AT5G55920
Ribosomal_large_subunit_biogenesis	ribosomal_large_subunit_biogenesis	2.07e-07	21	114	4.46	GO:0042273	AT1G23280 AT1G25260 AT1G29320 AT1G52930 AT1G61580 AT2G37990 AT2G40360 AT2G42710 AT3G15460 AT3G18600 AT3G55510 AT3G58660 AT4G01560 AT4G09730 AT4G15770 AT4G25730 AT4G26600 AT5G08180 AT5G14520 AT5G15550 AT5G55920
Response_to_light_stimulus	response_to_light	3.67e-10	73	746	2.37	GO:0009416	AT1G01060 AT1G07350 AT1G08650 AT1G09570 AT1G10370 AT1G10522 AT1G15510 AT1G17420 AT1G19350 AT1G22280 AT1G22770 AT1G27730 AT1G29910 AT1G30040 AT1G35210 AT1G44575 AT1G51140 AT1G56510 AT1G61800 AT1G73805 AT1G73870 AT1G75100 AT1G76570 AT1G78080 AT1G78440 AT2G02950 AT2G04030 AT2G17840 AT2G21650 AT2G30520 AT2G34430 AT2G36750 AT2G37040 AT2G41100 AT2G42540 AT2G42870 AT2G43010 AT3G08940 AT3G13450 AT3G17800…
Response_to_radiation	response_to_light	1.56e-09	73	770	2.29	GO:0009314	AT1G01060 AT1G07350 AT1G08650 AT1G09570 AT1G10370 AT1G10522 AT1G15510 AT1G17420 AT1G19350 AT1G22280 AT1G22770 AT1G27730 AT1G29910 AT1G30040 AT1G35210 AT1G44575 AT1G51140 AT1G56510 AT1G61800 AT1G73805 AT1G73870 AT1G75100 AT1G76570 AT1G78080 AT1G78440 AT2G02950 AT2G04030 AT2G17840 AT2G21650 AT2G30520 AT2G34430 AT2G36750 AT2G37040 AT2G41100 AT2G42540 AT2G42870 AT2G43010 AT3G08940 AT3G13450 AT3G17800…
Circadian_rhythm	сircadian_rhythm	1.07e-07	24	141	4.12	GO:0007623	AT1G01060 AT1G18330 AT1G19330 AT1G22770 AT2G17840 AT2G42540 AT3G04910 AT3G06080 AT3G06500 AT3G12320 AT3G14620 AT3G21890 AT3G22231 AT3G57040 AT4G15248 AT4G25100 AT4G26150 AT5G02840 AT5G06980 AT5G08330 AT5G11260 AT5G17300 AT5G23280 AT5G52310
Rhythmic_process	сircadian_rhythm	3.1e-07	24	150	3.87	GO:0048511	AT1G01060 AT1G18330 AT1G19330 AT1G22770 AT2G17840 AT2G42540 AT3G04910 AT3G06080 AT3G06500 AT3G12320 AT3G14620 AT3G21890 AT3G22231 AT3G57040 AT4G15248 AT4G25100 AT4G26150 AT5G02840 AT5G06980 AT5G08330 AT5G11260 AT5G17300 AT5G23280 AT5G52310
Regulation_of_seed_germination	seedlings_development	0.00256	12	86	3.38	GO:0010029	AT1G07430 AT1G20450 AT1G60190 AT1G66350 AT3G06500 AT3G22840 AT3G50500 AT3G63060 AT4G14690 AT4G26150 AT5G13200 AT5G56030
Regulation_of_seedling_development	seedlings_development	0.0011	13	90	3.49	GO:1900140	AT1G07430 AT1G20450 AT1G60190 AT1G66350 AT2G13790 AT3G06500 AT3G22840 AT3G50500 AT3G63060 AT4G14690 AT4G26150 AT5G13200 AT5G56030
Response_to_osmotic_stress	response_to_osmotic_stress	1.96e-17	74	549	3.26	GO:0006970	AT1G01140 AT1G02820 AT1G07400 AT1G08930 AT1G10370 AT1G22190 AT1G27730 AT1G52400 AT1G53540 AT1G54050 AT1G59860 AT1G59870 AT1G61340 AT1G66230 AT1G66350 AT1G76040 AT1G78080 AT2G04030 AT2G17840 AT2G19310 AT2G20880 AT2G26190 AT2G29500 AT2G30250 AT2G33380 AT2G34620 AT2G38470 AT2G38750 AT2G38760 AT2G42540 AT2G45180 AT2G47180 AT3G04290 AT3G08720 AT3G09350 AT3G23940 AT3G25230 AT3G45640 AT3G46230 AT3G50500…
Response_to_salt_stress	response_to_osmotic_stress	1.31e-17	68	470	3.5	GO:0009651	AT1G01140 AT1G02820 AT1G07400 AT1G08930 AT1G10370 AT1G27730 AT1G52400 AT1G53540 AT1G54050 AT1G59860 AT1G59870 AT1G61340 AT1G66230 AT1G66350 AT1G76040 AT1G78080 AT2G04030 AT2G17840 AT2G19310 AT2G20880 AT2G26190 AT2G29500 AT2G30250 AT2G33380 AT2G34620 AT2G38470 AT2G38750 AT2G38760 AT2G42540 AT2G45180 AT2G47180 AT3G04290 AT3G08720 AT3G09350 AT3G23940 AT3G46230 AT3G50500 AT3G56880 AT3G57530 AT3G60130…
Maturation_of_SSU-rRNA	maturation_of_SSU-rRNA	0.000208	11	55	4.84	GO:0030490	AT1G06720 AT1G15440 AT2G37990 AT3G06530 AT3G09720 AT3G10530 AT3G21540 AT3G56990 AT3G57940 AT4G28450 AT5G16750
Maturation_of_SSU-rRNA_from_tricistronic_rRNA_transcript_(SSU-rRNA_5.8S_rRNA_LSU-rRNA)	maturation_of_SSU-rRNA	0.0103909	5	20	6.04816	GO:0000463	AT1G06720 AT1G15440 AT2G37990 AT3G06530 AT3G10530 AT3G56990 AT4G28450 AT5G16750
Maturation_of_5.8S_rRNA	maturation_of_5.8S_rRNA	0.000152	9	35	6.22	GO:0000460	AT1G03360 AT1G23280 AT2G37990 AT2G40360 AT3G15140 AT4G01560 AT4G25730 AT5G14520 AT5G15550
Maturation_of_5.8S_rRNA_from_tricistronic_rRNA_transcript_(SSU-rRNA_5.8S_rRNA_LSU-rRNA)	maturation_of_5.8S_rRNA	0.000554995	7	24	7.05619	GO:0000466	AT1G03360 AT2G37990 AT2G40360 AT3G15140 AT4G25730 AT5G14520 AT5G15550
